# Supplementary material for: Novel triphenylphosphonium amphiphilic conjugates of glycerolipid type: synthesis, cytotoxic and antibacterial activity, and targeted cancer cell delivery
Source: Royal Society of Chemistry journal article supplement (doi:10.1039/d2md00363e), 2023-01-01
Supplement: d2md00363e1.pdf [file d2md00363e1.pdf]

## Electronic supplementary information

RCS Med. Chem.

### Novel triphenylphosphonium amphiphilic conjugates of glycerolipid type: Synthesis, cytotoxic and antibacterial activity, targeted cancer-cells delivery

Olga V. Tsepaeva,<sup>a</sup> Andrey V. Nemtarev,<sup>a</sup> Tatiana N. Pashirova,<sup>a</sup> Michail V. Khokhlachev,<sup>b</sup> Anna P. Lyubina,<sup>a</sup> Syumbelya K. Amerkhanova,<sup>a</sup> Alexandra D. Voloshina,<sup>a</sup> Vladimir F. Mironov<sup>a</sup>

<sup>a</sup> Arbuzov Institute of Organic and Physical Chemistry, FRC Kazan Scientific Center of RAS,  
Arbuzov Str. 8, 420088 Kazan, Russian Federation

<sup>b</sup> Kazan (Volga Region) Federal University, Kremlevskaya Str. 18, 420008 Kazan, Russian Federation

#### Table of contents

|                                                                                                                    |     |
|--------------------------------------------------------------------------------------------------------------------|-----|
| Electronic supplementary Information                                                                               | S1  |
| Table of contents                                                                                                  | S1  |
| Figure S1. <sup>1</sup> H NMR spectrum (400 MHz, CDCl <sub>3</sub> ) of compound <b>1a</b> .                       | S5  |
| Figure S2. IR (KBr) spectrum of <b>1a</b> .                                                                        | S6  |
| Figure S3. <sup>1</sup> H NMR spectrum (400 MHz, CDCl <sub>3</sub> ) of compound <b>1b</b> .                       | S7  |
| Figure S4. IR (KBr) spectrum of <b>1b</b>                                                                          | S8  |
| Figure S5. <sup>1</sup> H NMR spectrum (400 MHz, CDCl <sub>3</sub> ) of compound <b>1c</b> .                       | S9  |
| Figure S6. IR (KBr) spectrum of <b>1c</b> .                                                                        | S10 |
| Figure S7. <sup>13</sup> C- <sup>1</sup> H NMR (CDCl <sub>3</sub> , 100.6 MHz) spectrum of <b>1c</b> .             | S11 |
| Figure S8. Fragment of <sup>13</sup> C- <sup>1</sup> H NMR (CDCl <sub>3</sub> , 100.6 MHz) spectrum of <b>1c</b> . | S12 |
| Figure S9. <sup>13</sup> C NMR (CDCl <sub>3</sub> , 100.6 MHz) spectrum of <b>1c</b> .                             | S13 |
| Figure S10. <sup>13</sup> C- <sup>1</sup> H apt NMR (CDCl <sub>3</sub> , 100.6 MHz) spectrum of <b>1c</b> .        | S14 |
| Figure S11. <sup>1</sup> H NMR spectrum (400 MHz, CDCl <sub>3</sub> ) of compound <b>2a</b> .                      | S15 |
| Figure S12. IR (KBr) spectrum of <b>2a</b> .                                                                       | S16 |
| Figure S13. <sup>1</sup> H NMR spectrum (400 MHz, CDCl <sub>3</sub> ) of compound <b>2b</b>                        | S17 |
| Figure S14. IR (KBr) spectrum of <b>2b</b> .                                                                       | S18 |

|                                                                                                                                                                                   |     |
|-----------------------------------------------------------------------------------------------------------------------------------------------------------------------------------|-----|
| Figure S15. $^1\text{H}$ NMR spectrum (400 MHz, $\text{CDCl}_3$ ) of compound <b>2c</b> .                                                                                         | S19 |
| Figure S16. IR (KBr) spectrum of <b>2c</b> .                                                                                                                                      | S20 |
| Figure S17. $^{13}\text{C}$ - $\{^1\text{H}\}$ NMR ( $\text{CDCl}_3$ , 100.6 MHz) spectrum of <b>2c</b> .                                                                         | S21 |
| Figure S18. $^1\text{H}$ NMR spectrum (400 MHz, $\text{CDCl}_3$ ) of compound <b>3b</b> .                                                                                         | S22 |
| Figure S19. IR (KBr) spectrum of <b>3b</b> .                                                                                                                                      | S23 |
| Figure S20. $^1\text{H}$ NMR spectrum (400 MHz, $\text{CDCl}_3$ ) of compound <b>4a</b> .                                                                                         | S24 |
| Figure S21. IR (KBr) spectrum of <b>4a</b> .                                                                                                                                      | S25 |
| Figure S22. $^{13}\text{C}$ - $\{^1\text{H}\}$ NMR ( $\text{CDCl}_3$ , 100.6 MHz) spectrum of <b>4a</b> .                                                                         | S26 |
| Figure S23. $^{13}\text{C}$ - $\{^1\text{H}\}$ apt NMR ( $\text{CDCl}_3$ , 100.6 MHz) spectrum of <b>4a</b> .                                                                     | S27 |
| Figure S24. $^{31}\text{P}$ - $\{^1\text{H}\}$ NMR ( $\text{CDCl}_3$ , 162 MHz) spectrum of <b>4a</b> .                                                                           | S28 |
| Figure S25. $^1\text{H}$ NMR spectrum (400 MHz, $\text{CDCl}_3$ ) of compound <b>4b</b> .                                                                                         | S29 |
| Figure S26. IR (KBr) spectrum of <b>4b</b> .                                                                                                                                      | S30 |
| Figure S27. $^{13}\text{C}$ - $\{^1\text{H}\}$ NMR ( $\text{CDCl}_3$ , 100.6 MHz) spectrum of <b>4b</b> .                                                                         | S31 |
| Figure S28. $^{13}\text{C}$ - $\{^1\text{H}\}$ apt NMR ( $\text{CDCl}_3$ , 100.6 MHz) spectrum of <b>4b</b> .                                                                     | S32 |
| Figure S29. $^{31}\text{P}$ - $\{^1\text{H}\}$ NMR ( $\text{CDCl}_3$ , 162 MHz) spectrum of <b>4b</b> .                                                                           | S33 |
| Figure S30. $^{13}\text{C}$ - $\{^1\text{H}\}$ NMR ( $\text{CDCl}_3$ , 100.6 MHz) spectrum of <b>4c</b> .                                                                         | S34 |
| Figure S31. $^{13}\text{C}$ - $\{^1\text{H}\}$ apt NMR ( $\text{CDCl}_3$ , 100.6 MHz) spectrum of <b>4c</b> .                                                                     | S35 |
| Figure S32. $^{31}\text{P}$ - $\{^1\text{H}\}$ NMR ( $\text{CDCl}_3$ , 162 MHz) spectrum of <b>4c</b> .                                                                           | S36 |
| Figure S33. $^1\text{H}$ NMR spectrum (400 MHz, $\text{CDCl}_3$ ) of compound <b>5b</b> .                                                                                         | S37 |
| Figure S34. IR (KBr) spectrum of <b>5b</b> .                                                                                                                                      | S38 |
| Figure S35. $^{13}\text{C}$ - $\{^1\text{H}\}$ NMR ( $\text{CDCl}_3$ , 100.6 MHz) spectrum of <b>5b</b> .                                                                         | S39 |
| Figure S36. $^{31}\text{P}$ - $\{^1\text{H}\}$ NMR ( $\text{CDCl}_3$ , 162 MHz) spectrum of <b>5b</b> .                                                                           | S40 |
| Figure S37. $^1\text{H}$ NMR spectrum (400 MHz, $\text{CDCl}_3$ ) of compound <b>6</b> .                                                                                          | S41 |
| Figure S38. IR (KBr) spectrum of <b>6</b> .                                                                                                                                       | S42 |
| Figure S39. $^1\text{H}$ NMR spectrum (400 MHz, $\text{CDCl}_3$ ) of compound <b>7</b> .                                                                                          | S43 |
| Figure S40. High-field region of $^1\text{H}$ NMR spectrum (400 MHz, $\text{CDCl}_3$ ) of compound <b>7</b> .                                                                     | S44 |
| Figure S41. IR (KBr) spectrum of <b>7</b> .                                                                                                                                       | S45 |
| Figure S42. $^{13}\text{C}$ - $\{^1\text{H}\}$ NMR spectrum (100.6 MHz, $\text{CDCl}_3$ ) of compound <b>7</b> .                                                                  | S46 |
| Figure S43. $^{13}\text{C}$ NMR spectrum (100.6 MHz, $\text{CDCl}_3$ ) of compound <b>7</b> .                                                                                     | S47 |
| Figure S44. High-field region of $^{13}\text{C}$ NMR spectrum (100.6 MHz, $\text{CDCl}_3$ ) of compound <b>7</b> .                                                                | S48 |
| Figure S45. $^{13}\text{C}$ - $\{^1\text{H}\}$ and $^{13}\text{C}$ - $\{^1\text{H}\}$ -dept NMR spectra (100.6 MHz, $\text{CDCl}_3$ ) of compound <b>7</b> .                      | S49 |
| Figure S46. High-field region of $^{13}\text{C}$ - $\{^1\text{H}\}$ and $^{13}\text{C}$ - $\{^1\text{H}\}$ -dept NMR spectra (100.6 MHz, $\text{CDCl}_3$ ) of compound <b>7</b> . | S50 |
| Figure S47. $^{13}\text{C}$ - $\{^1\text{H}\}$ and $^{13}\text{C}$ NMR spectra (100.6 MHz, $\text{CDCl}_3$ ) of compound <b>7</b> .                                               | S51 |
| Figure S48. Aromatic carbons region of $^{13}\text{C}$ - $\{^1\text{H}\}$ and $^{13}\text{C}$ NMR spectra (100.6 MHz, $\text{CDCl}_3$ ) of compound <b>7</b> .                    | S52 |

|                                                                                                                                                                                       |     |
|---------------------------------------------------------------------------------------------------------------------------------------------------------------------------------------|-----|
| Figure S49. High-field region of $^{13}\text{C}$ - $\{^1\text{H}\}$ and $^{13}\text{C}$ NMR spectra (100.6 MHz, $\text{CDCl}_3$ ) of compound <b>7</b> .                              | S53 |
| Figure S50. $^{31}\text{P}$ - $\{^1\text{H}\}$ NMR spectrum (162 MHz, $\text{CDCl}_3$ ) of compound <b>7</b> .                                                                        | S54 |
| Figure S51. $^1\text{H}$ NMR spectrum (400 MHz, $\text{CDCl}_3$ ) of compound <b>8</b> .                                                                                              | S55 |
| Figure S52. IR (KBr) spectrum of <b>8</b> .                                                                                                                                           | S56 |
| Figure S53. $^1\text{H}$ NMR spectrum (400 MHz, $\text{CDCl}_3$ ) of compound <b>9</b> .                                                                                              | S57 |
| Figure S54. IR (KBr) spectrum of <b>9</b> .                                                                                                                                           | S58 |
| Figure S55. $^1\text{H}$ NMR spectrum (400 MHz, $\text{CDCl}_3$ ) of compound <b>10</b> .                                                                                             | S59 |
| Figure S56. Fragments of $^1\text{H}$ NMR spectrum (400 MHz, $\text{CDCl}_3$ ) of compound <b>10</b> .                                                                                | S60 |
| Figure S57. IR (KBr) spectrum of <b>10</b> .                                                                                                                                          | S61 |
| Figure S58. $^{13}\text{C}$ - $\{^1\text{H}\}$ NMR spectrum (100.6 MHz, $\text{CDCl}_3$ ) of compound <b>10</b> .                                                                     | S62 |
| Figure S59. High-field region of $^{13}\text{C}$ - $\{^1\text{H}\}$ NMR spectrum (100.6 MHz, $\text{CDCl}_3$ ) of compound <b>10</b> .                                                | S63 |
| Figure S60. $^{13}\text{C}$ - $\{^1\text{H}\}$ and $^{13}\text{C}$ - $\{^1\text{H}\}$ -dept NMR spectra (100.6 MHz, $\text{CDCl}_3$ ) of compound <b>10</b> .                         | S64 |
| Figure S61. High-field region of $^{13}\text{C}$ - $\{^1\text{H}\}$ and $^{13}\text{C}$ - $\{^1\text{H}\}$ -dept NMR spectra (100.6 MHz, $\text{CDCl}_3$ ) of compound <b>10</b> .    | S65 |
| Figure S62. The 14-44 ppm region of $^{13}\text{C}$ - $\{^1\text{H}\}$ and $^{13}\text{C}$ - $\{^1\text{H}\}$ -dept NMR spectra (100.6 MHz, $\text{CDCl}_3$ ) of compound <b>10</b> . | S66 |
| Figure S63. $^{13}\text{C}$ NMR spectrum (100.6 MHz, $\text{CDCl}_3$ ) of compound <b>10</b> .                                                                                        | S67 |
| Figure S64. The 46-57 and 31-44 ppm regions of $^{13}\text{C}$ NMR spectrum (100.6 MHz, $\text{CDCl}_3$ ) of compound <b>10</b> .                                                     | S68 |
| Figure S65. The 12-32 ppm region of $^{13}\text{C}$ NMR spectrum (100.6 MHz, $\text{CDCl}_3$ ) of compound <b>10</b> .                                                                | S69 |
| Figure S66. $^{13}\text{C}$ - $\{^1\text{H}\}$ and $^{13}\text{C}$ NMR spectra (100.6 MHz, $\text{CDCl}_3$ ) of compound <b>10</b> .                                                  | S70 |
| Figure S67. Down-field region of $^{13}\text{C}$ - $\{^1\text{H}\}$ and $^{13}\text{C}$ NMR spectra (100.6 MHz, $\text{CDCl}_3$ ) of compound <b>10</b> .                             | S71 |
| Figure S68. High-field region of $^{13}\text{C}$ - $\{^1\text{H}\}$ and $^{13}\text{C}$ NMR spectra (100.6 MHz, $\text{CDCl}_3$ ) of compound <b>10</b> .                             | S72 |
| Figure S69. The 32-57 ppm region of $^{13}\text{C}$ - $\{^1\text{H}\}$ and $^{13}\text{C}$ NMR spectra (100.6 MHz, $\text{CDCl}_3$ ) of compound <b>10</b> .                          | S73 |
| Figure S70. The 12-36 ppm region of $^{13}\text{C}$ - $\{^1\text{H}\}$ and $^{13}\text{C}$ NMR spectra (100.6 MHz, $\text{CDCl}_3$ ) of compound <b>10</b> .                          | S74 |
| Figure S71. $^{31}\text{P}$ - $\{^1\text{H}\}$ NMR spectrum (162 MHz, $\text{CDCl}_3$ ) of compound <b>10</b> .                                                                       | S75 |
| Figure S72. $^1\text{H}$ NMR spectrum (400 MHz, $\text{CDCl}_3$ ) of compound <b>12</b> .                                                                                             | S76 |
| Figure S73. IR (KBr) spectrum of <b>12</b> .                                                                                                                                          | S77 |
| Figure S74. $^{13}\text{C}$ - $\{^1\text{H}\}$ NMR ( $\text{CDCl}_3$ , 100.6 MHz) spectrum of <b>12</b> .                                                                             | S78 |
| Figure S75. $^{13}\text{C}$ - $\{^1\text{H}\}$ apt NMR ( $\text{CDCl}_3$ , 100.6 MHz) spectrum of <b>12</b> .                                                                         | S79 |
| Figure S76. $^1\text{H}$ NMR spectrum (400 MHz, $\text{CDCl}_3$ ) of compound <b>13</b> .                                                                                             | S80 |
| Figure S77. IR (KBr) spectrum of <b>13</b> .                                                                                                                                          | S81 |
| Figure S78. $^{13}\text{C}$ - $\{^1\text{H}\}$ NMR ( $\text{CDCl}_3$ , 100.6 MHz) spectrum of <b>13</b> .                                                                             | S82 |
| Figure S79. $^{13}\text{C}$ NMR ( $\text{CDCl}_3$ , 100.6 MHz) spectrum of <b>13</b> .                                                                                                | S83 |
| Figure S80. $^{13}\text{C}$ - $\{^1\text{H}\}$ apt NMR ( $\text{CDCl}_3$ , 100.6 MHz) spectrum of <b>13</b> .                                                                         | S84 |
| Figure S81. $^1\text{H}$ NMR spectrum (400 MHz, $\text{CDCl}_3$ ) of compound <b>14</b> .                                                                                             | S85 |
| Figure S82. IR (KBr) spectrum of <b>14</b> .                                                                                                                                          | S86 |

Figure S83.  $^{13}\text{C}\{-^1\text{H}\}$  NMR ( $\text{CDCl}_3$ , 100.6 MHz) spectrum of **14**.  
Figure S84.  $^{13}\text{C}\{-^1\text{H}\}$  apt NMR ( $\text{CDCl}_3$ , 100.6 MHz) spectrum of **14**.  
Figure S85.  $^{31}\text{P}\{-^1\text{H}\}$  NMR ( $\text{CDCl}_3$ , 162 MHz) spectrum of **14**.

S87  
S88  
S89

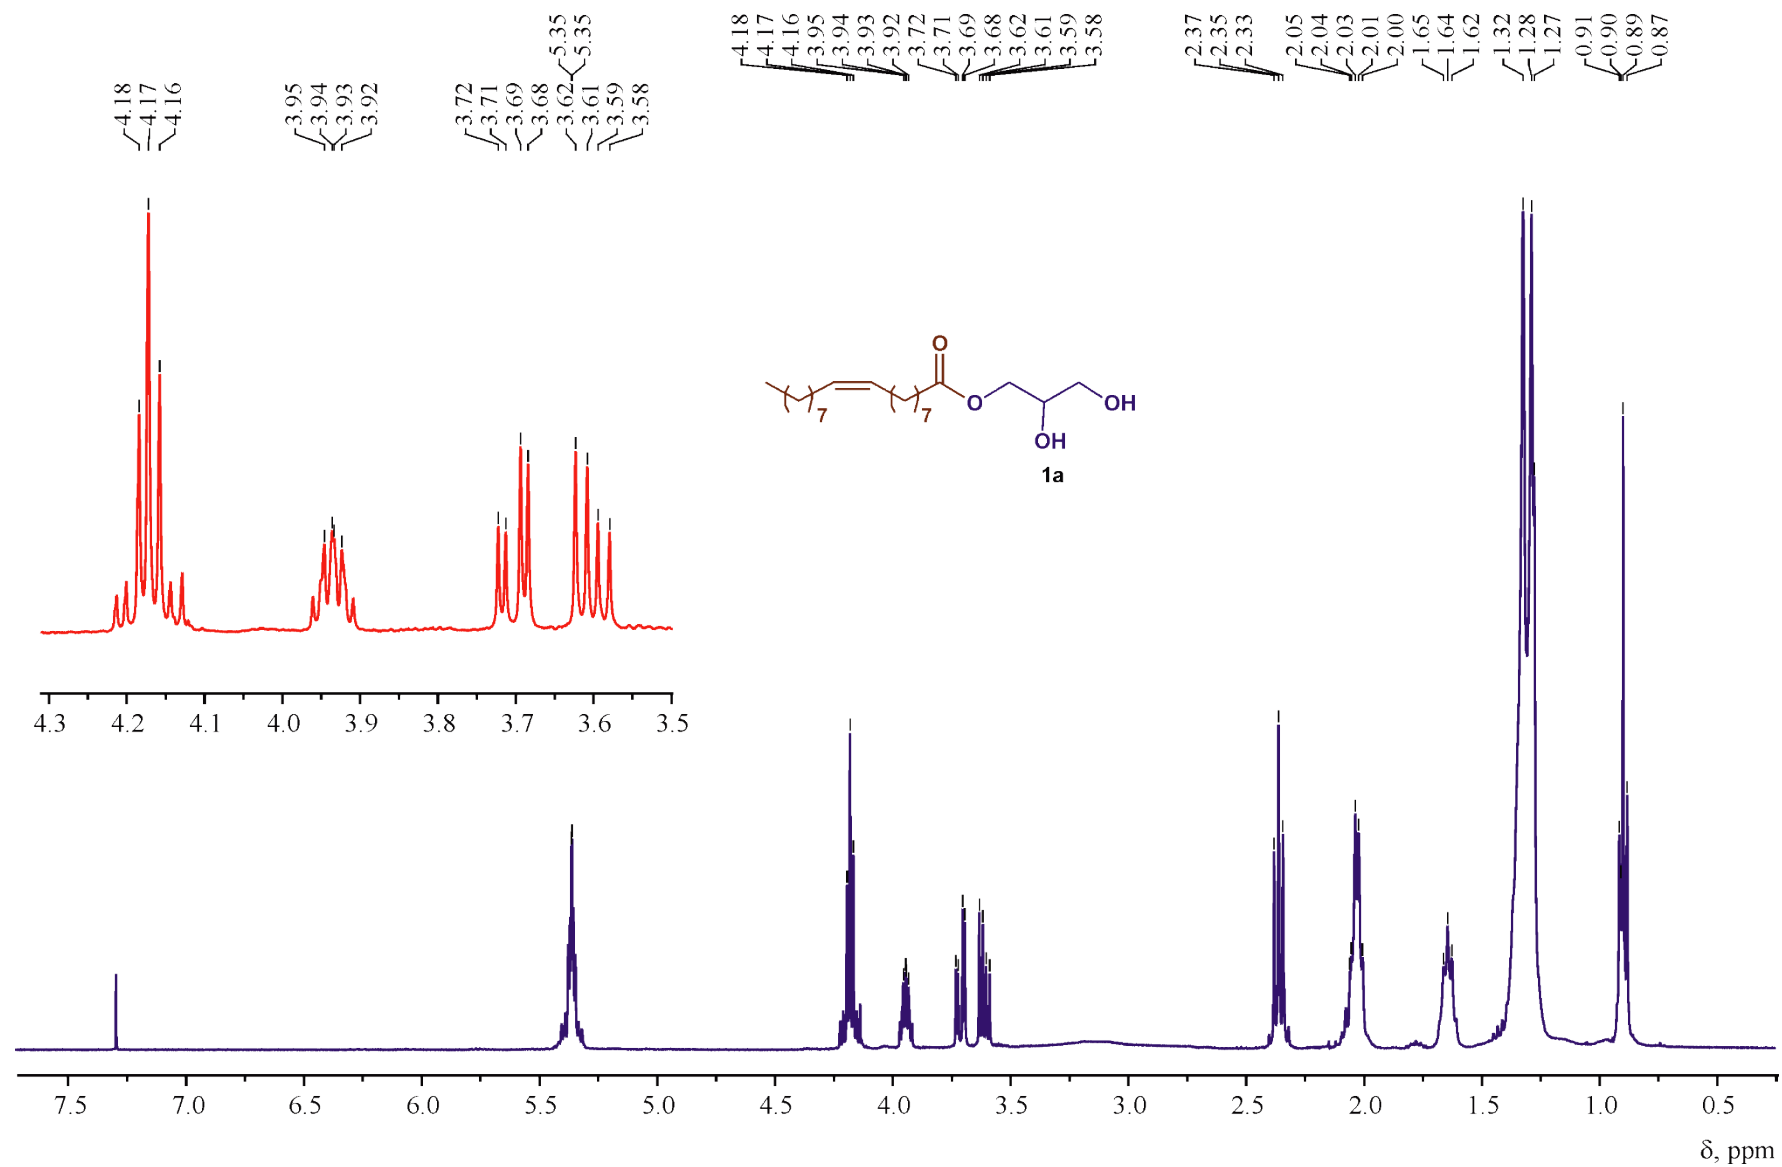

Figure S1.  $^1\text{H}$  NMR spectrum (400 MHz,  $\text{CDCl}_3$ ) of compound **1a**.

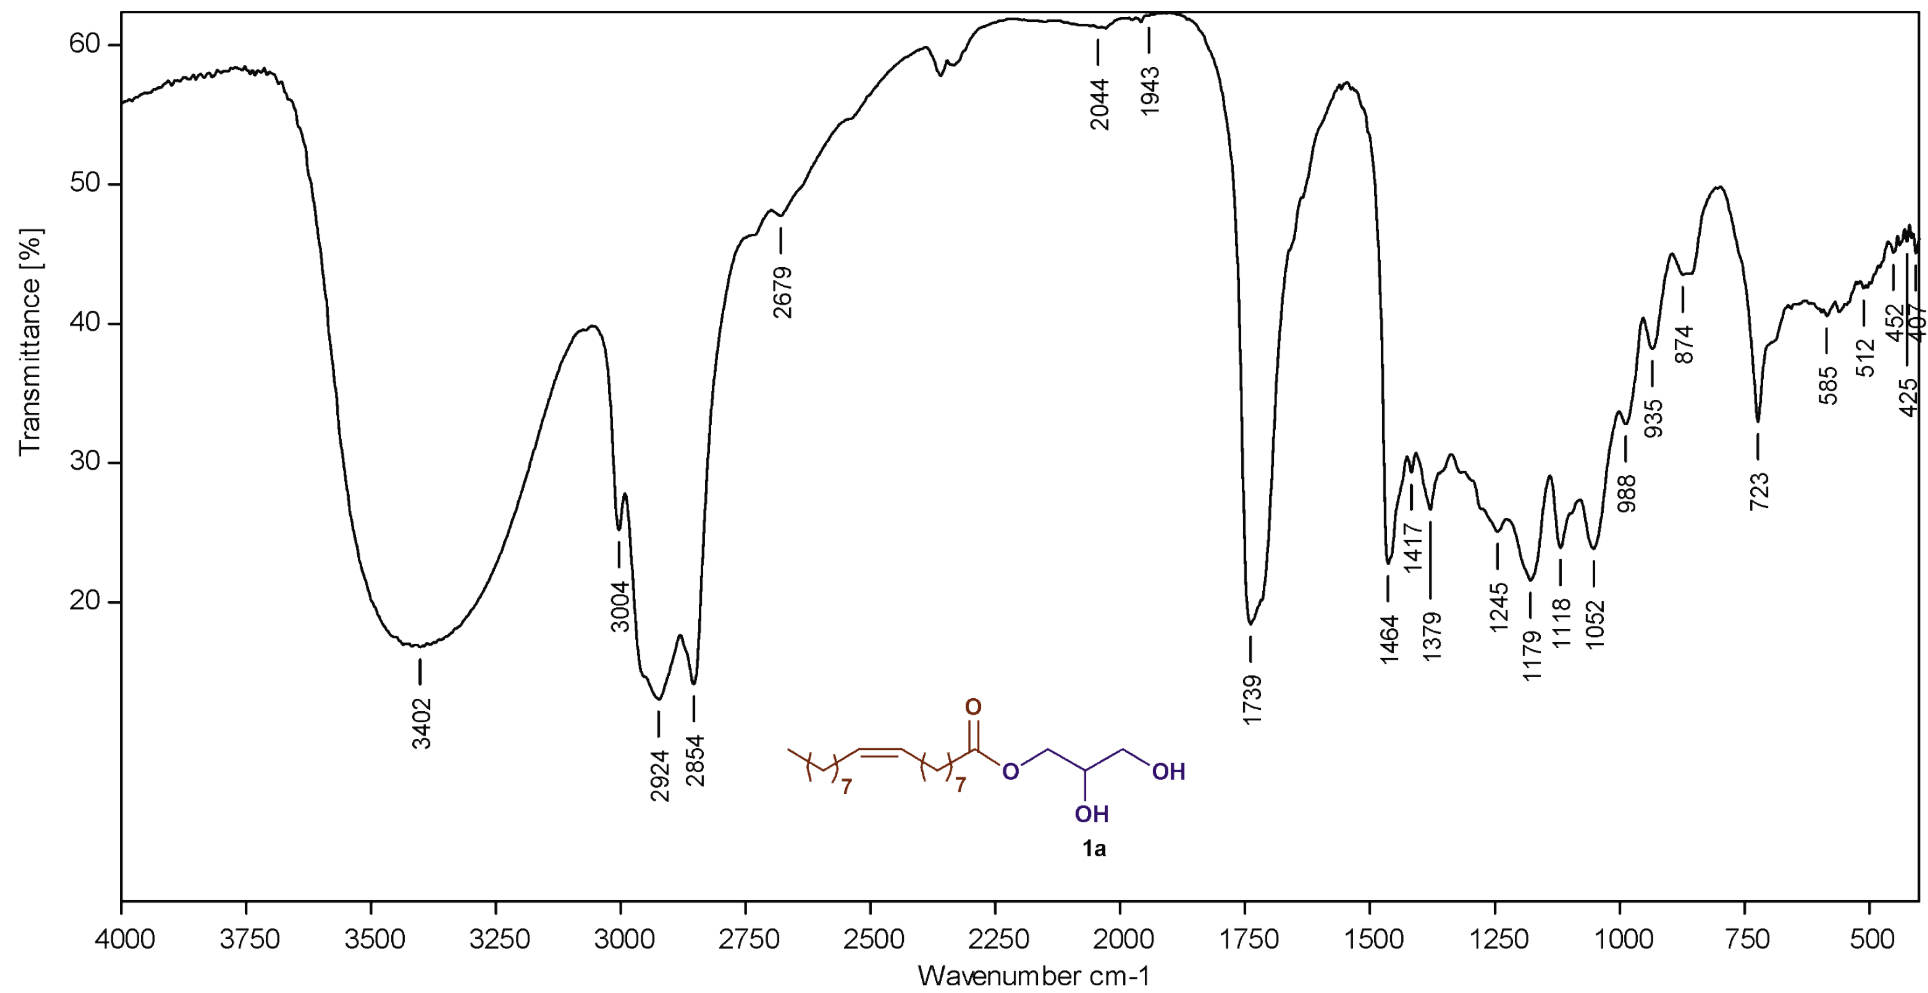

Figure S2. IR (KBr) spectrum of **1a**.

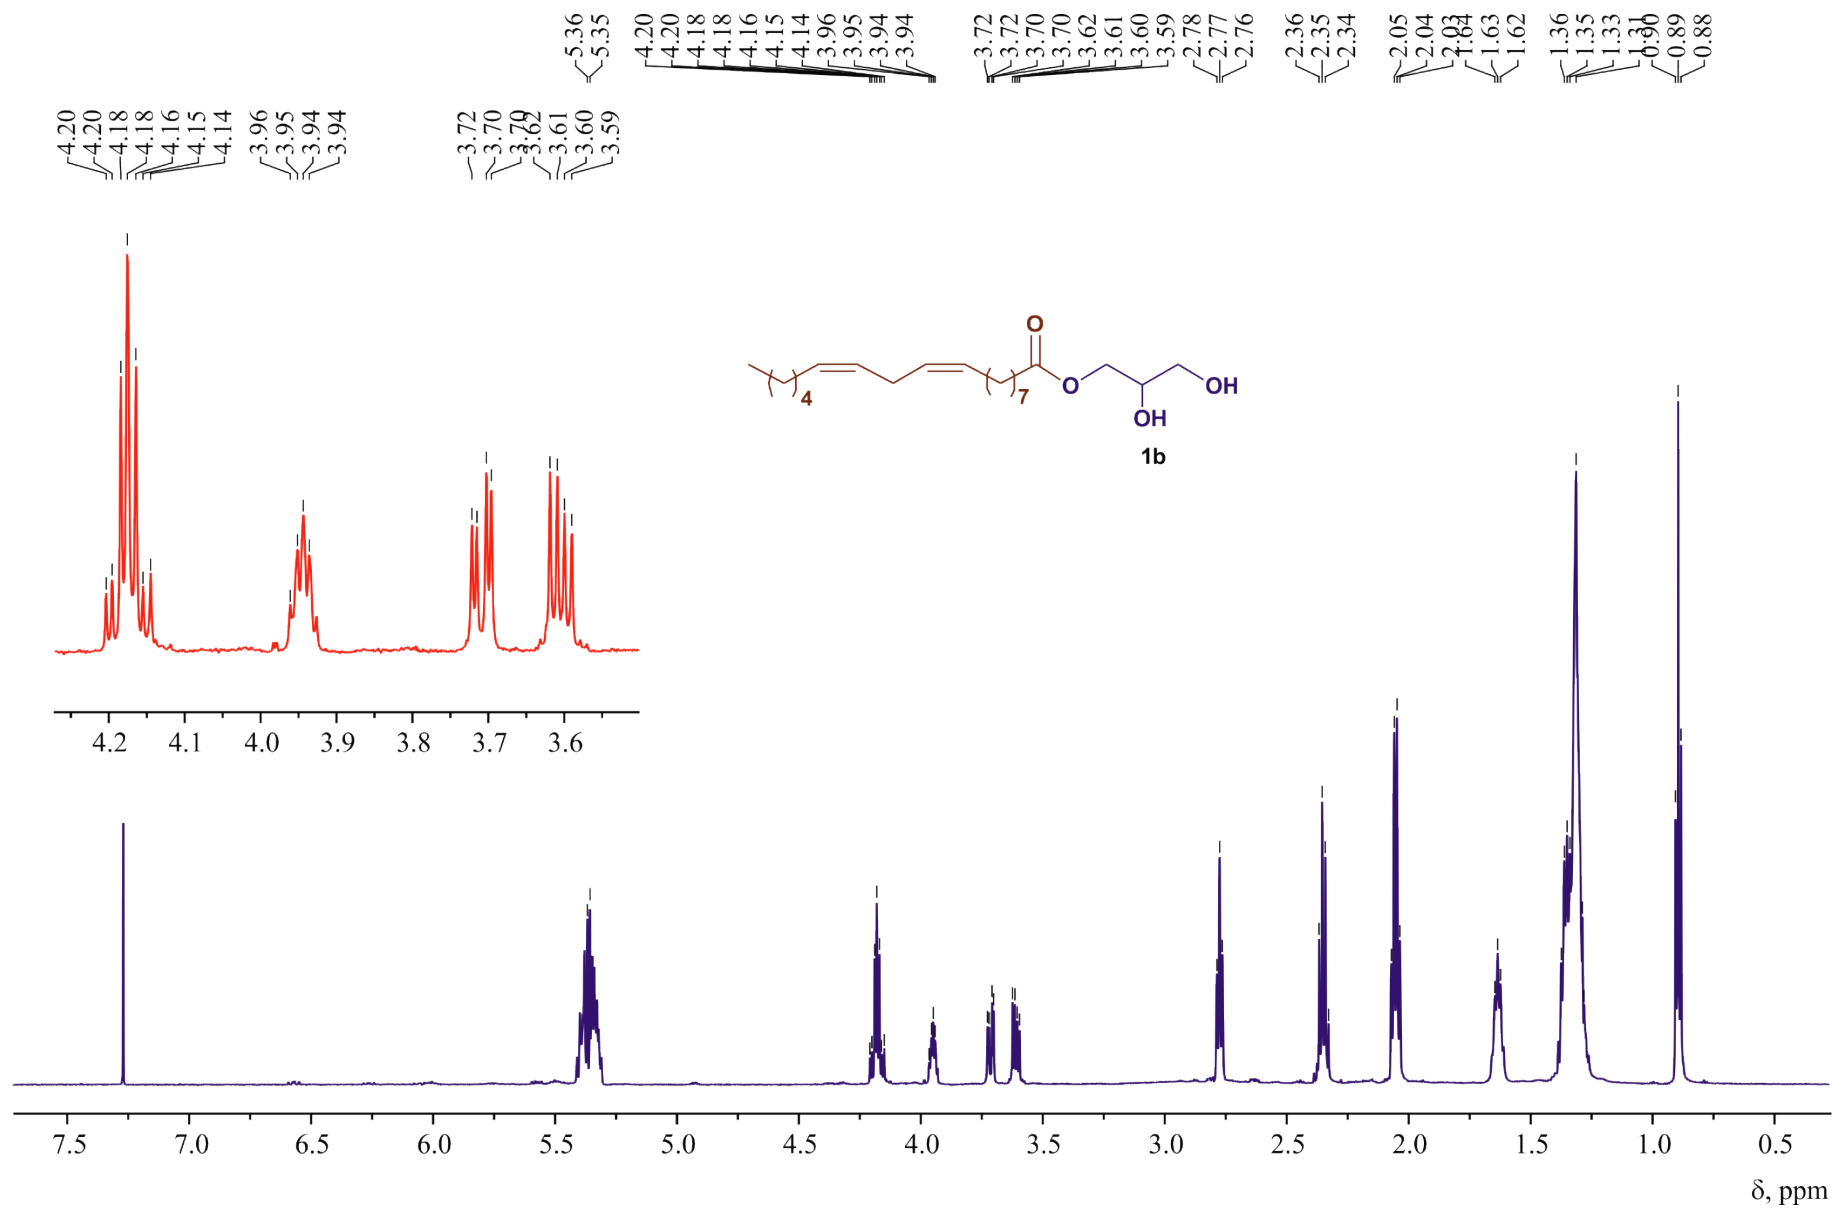

Figure S3. <sup>1</sup>H NMR spectrum (400 MHz, CDCl<sub>3</sub>) of compound **1b**.

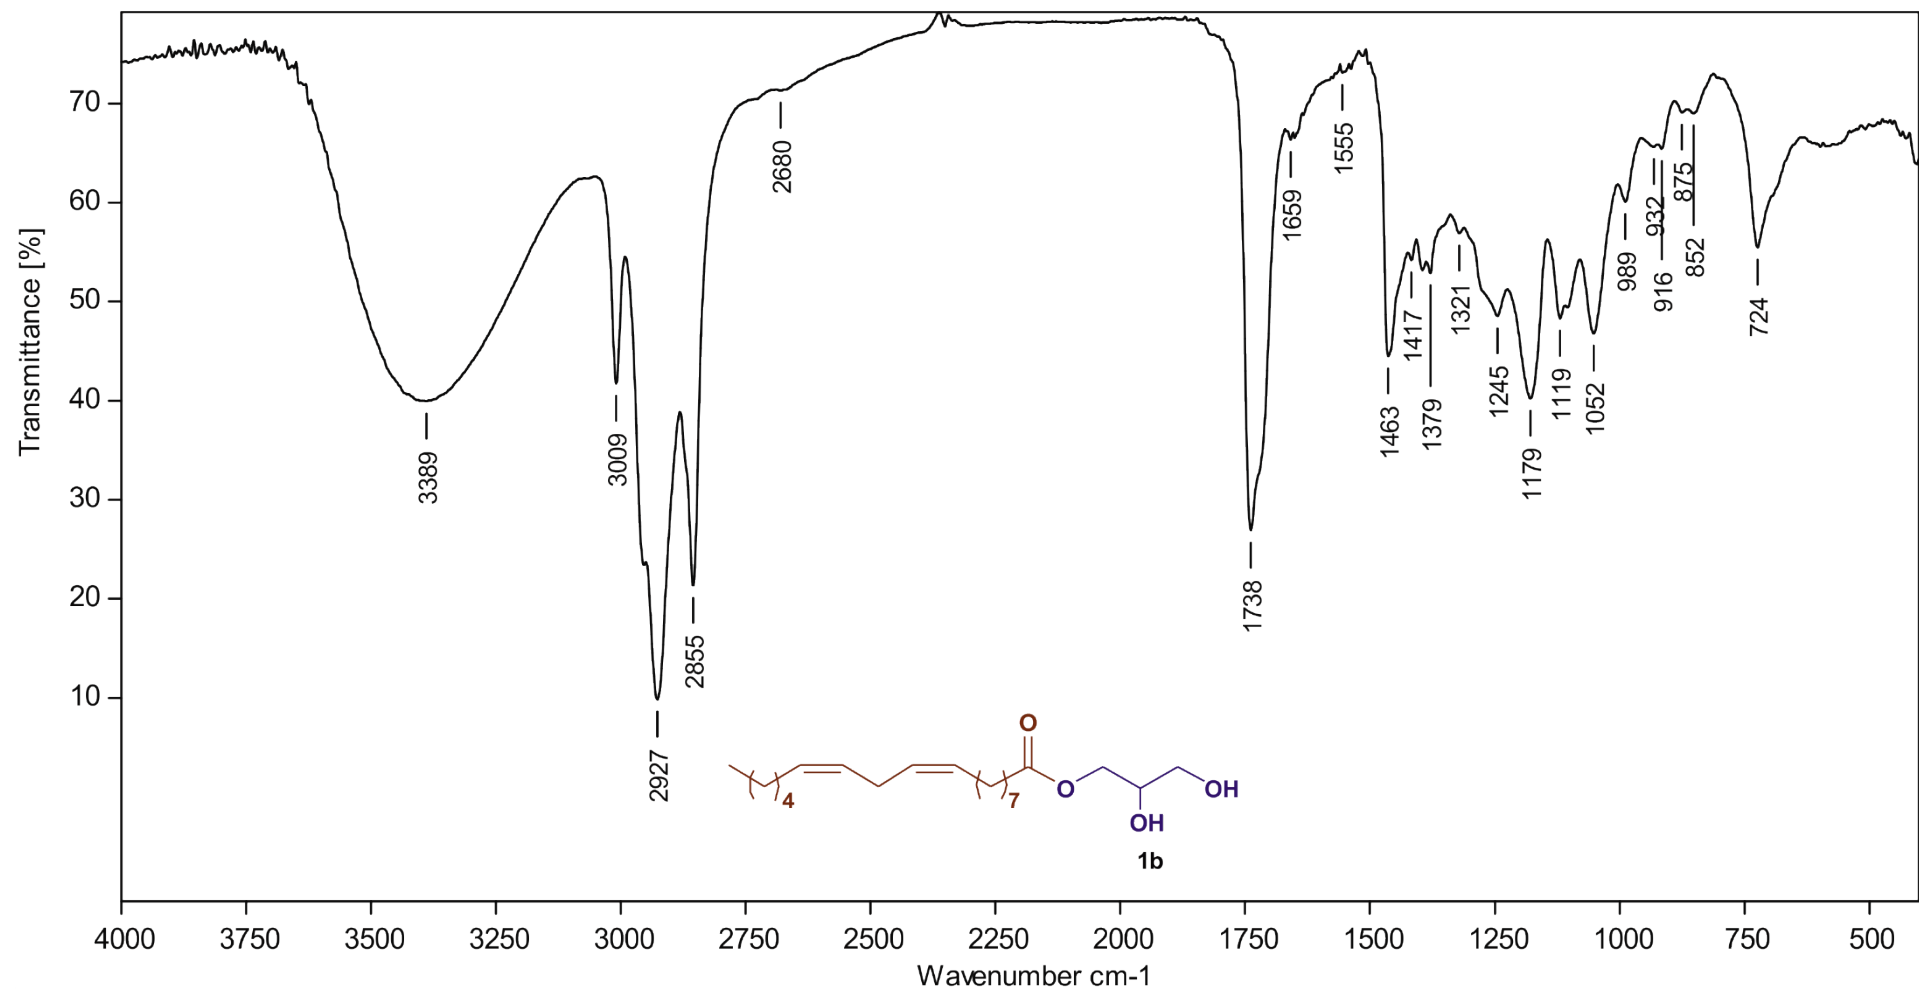

Figure S4. IR (KBr) spectrum of **1b**.



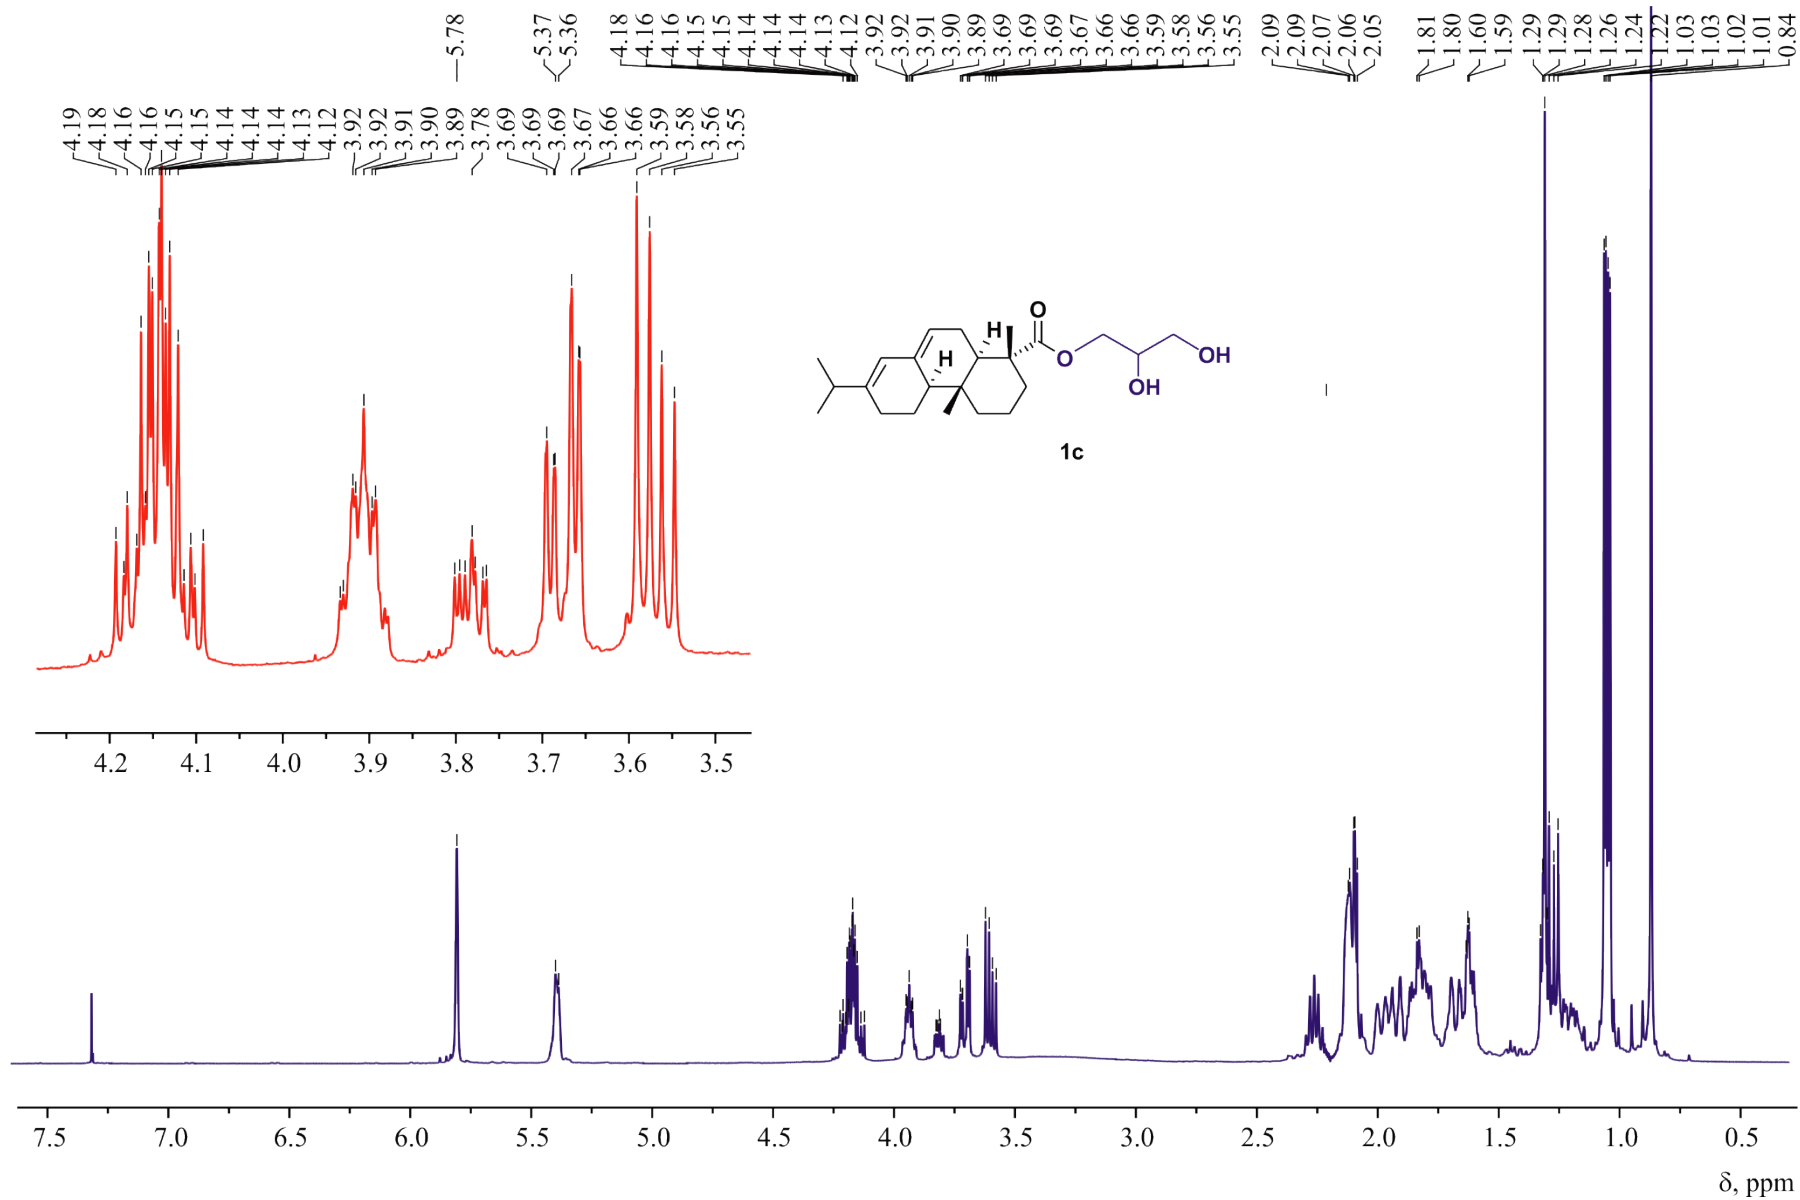

Figure S5. <sup>1</sup>H NMR spectrum (400 MHz, CDCl<sub>3</sub>) of compound **1c**.

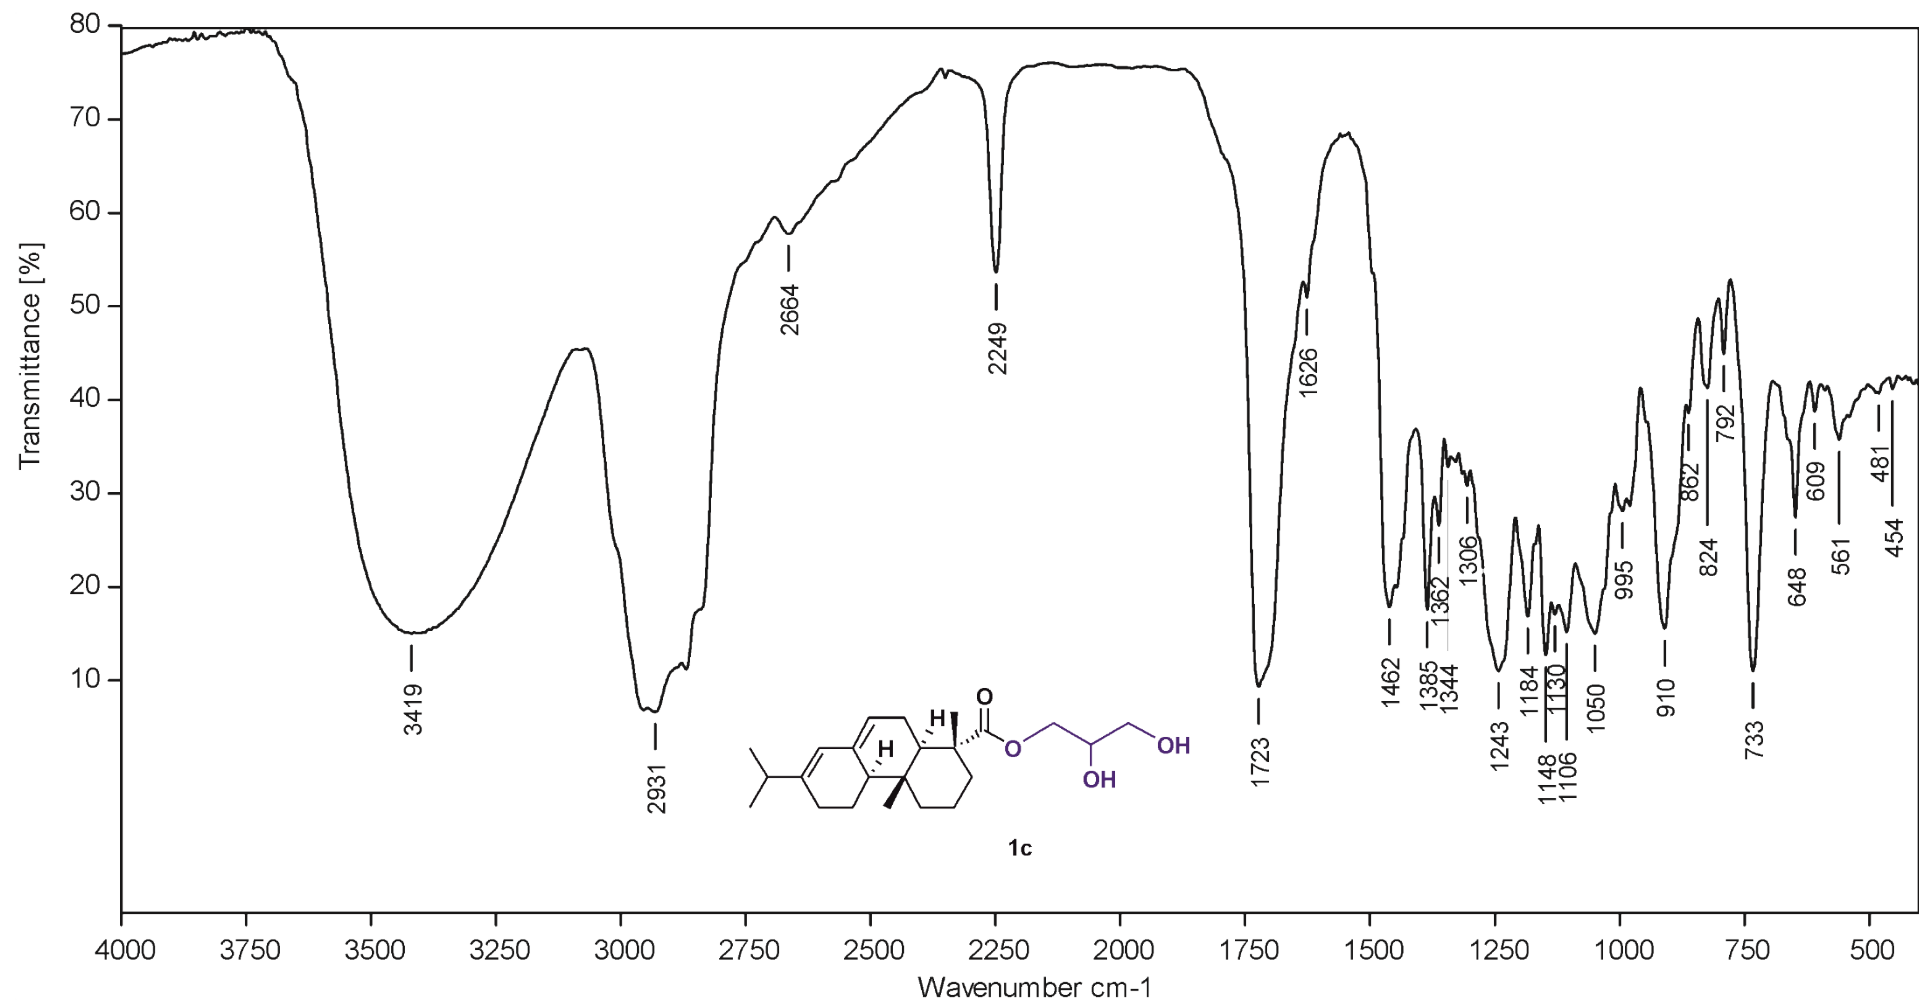

Figure S6. IR (KBr) spectrum of **1c**.

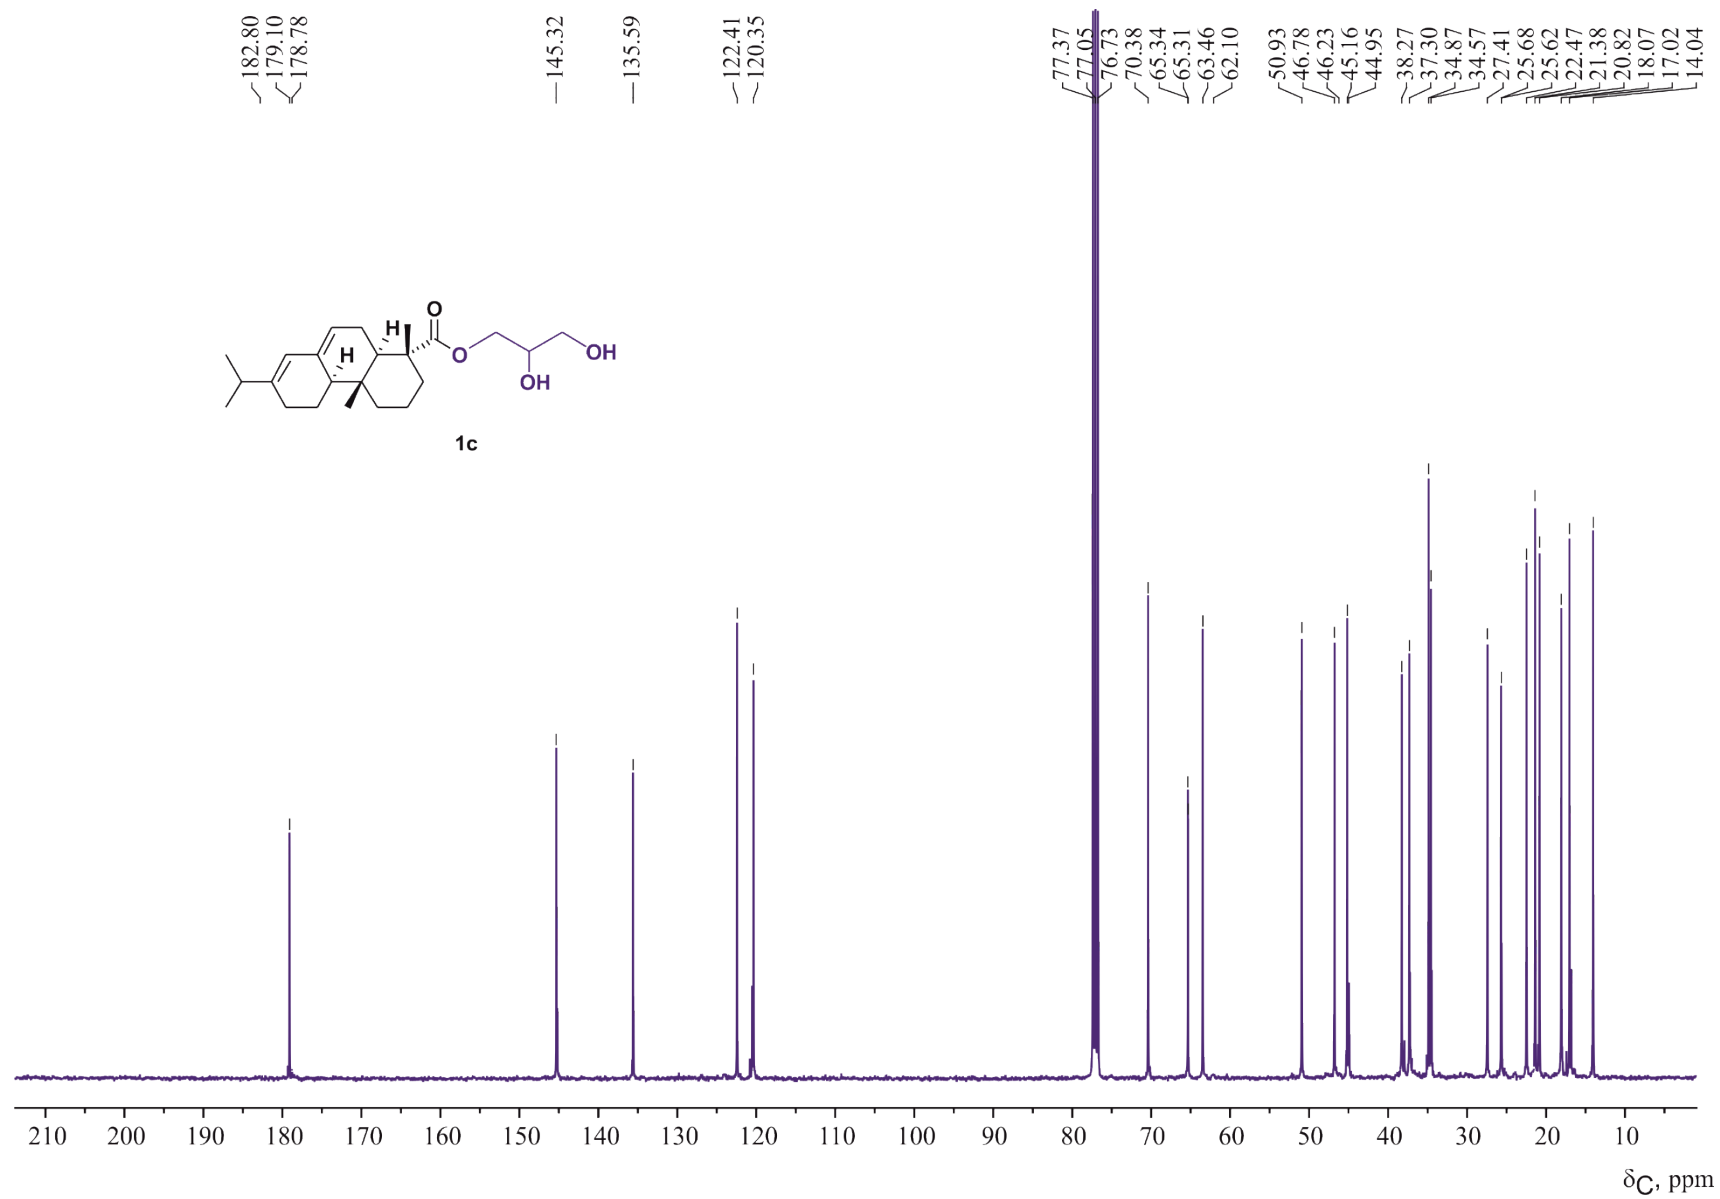

Figure S7.  $^{13}\text{C}$ - $\{^1\text{H}\}$  NMR (CDCl<sub>3</sub>, 100.6 MHz) spectrum of **1c**.

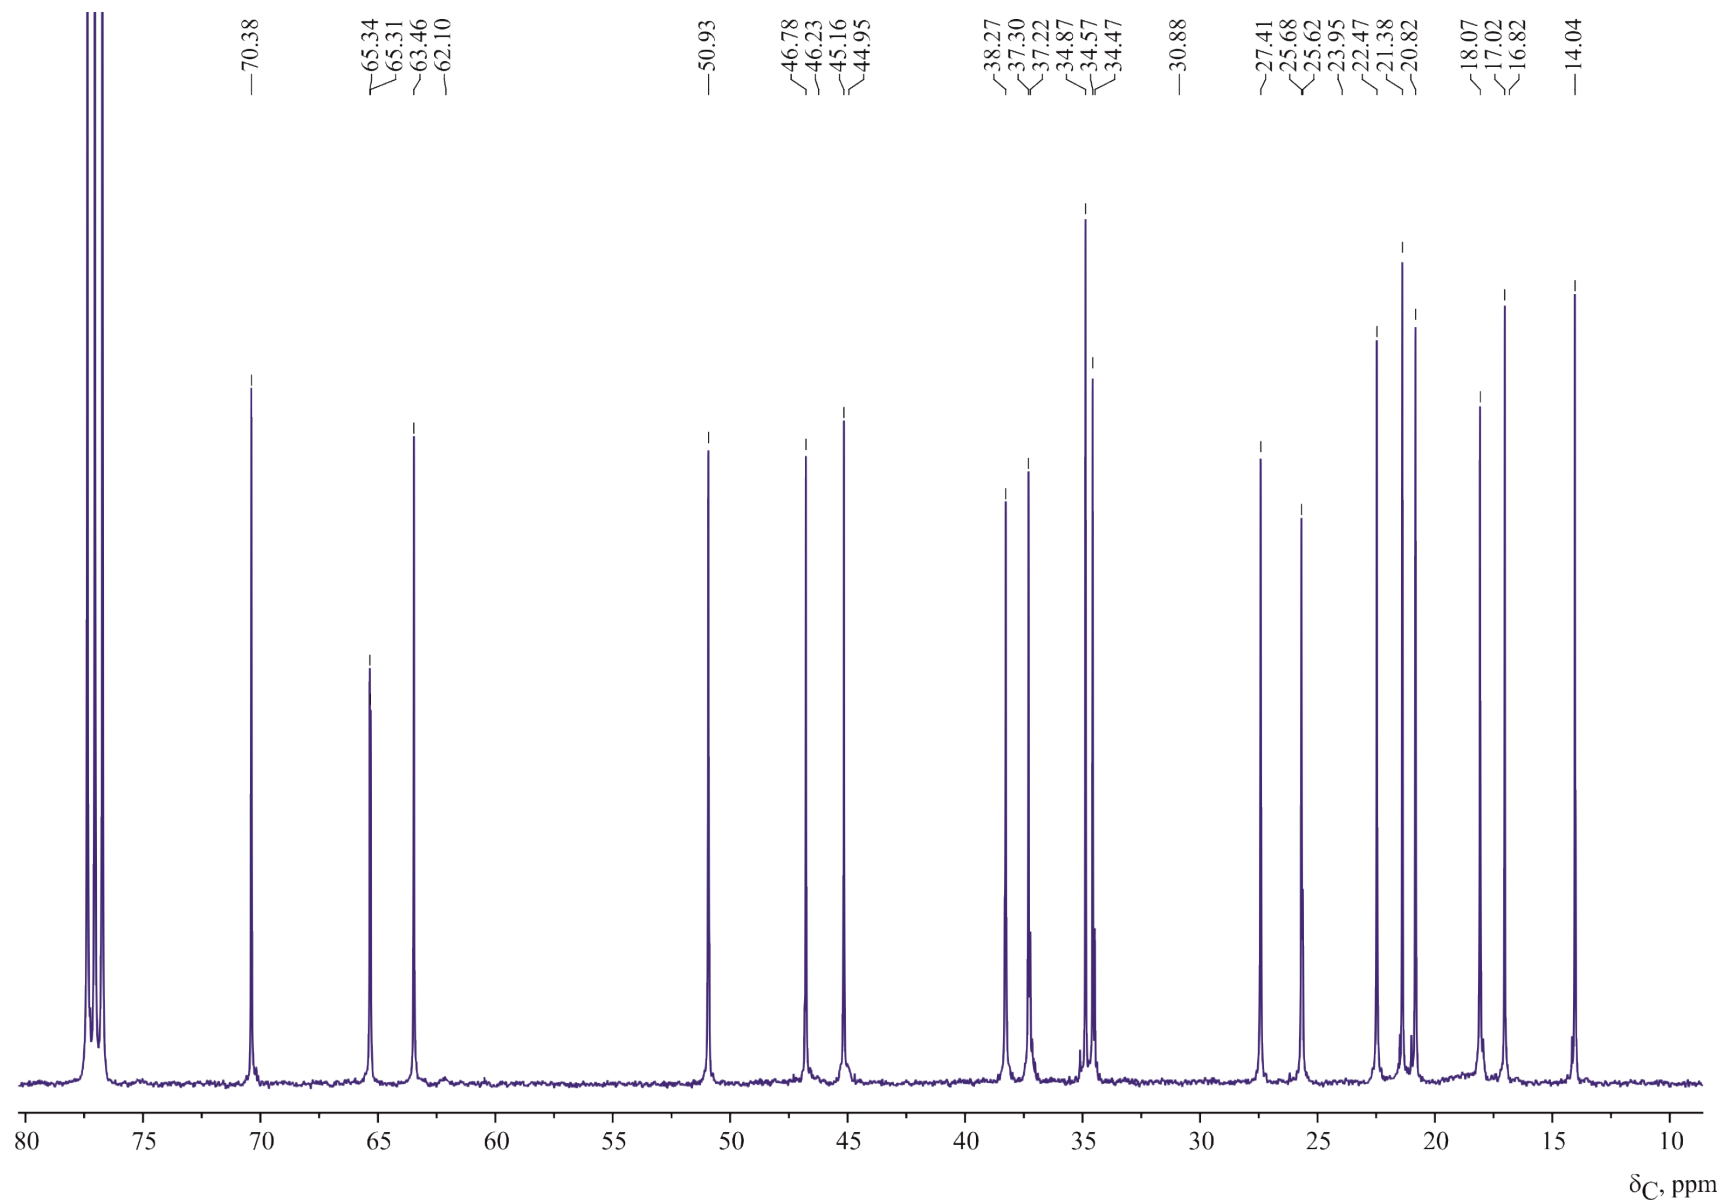

Figure S8. Fragment of  $^{13}\text{C}$ - $\{^1\text{H}\}$  NMR ( $\text{CDCl}_3$ , 100.6 MHz) spectrum of **1c**.

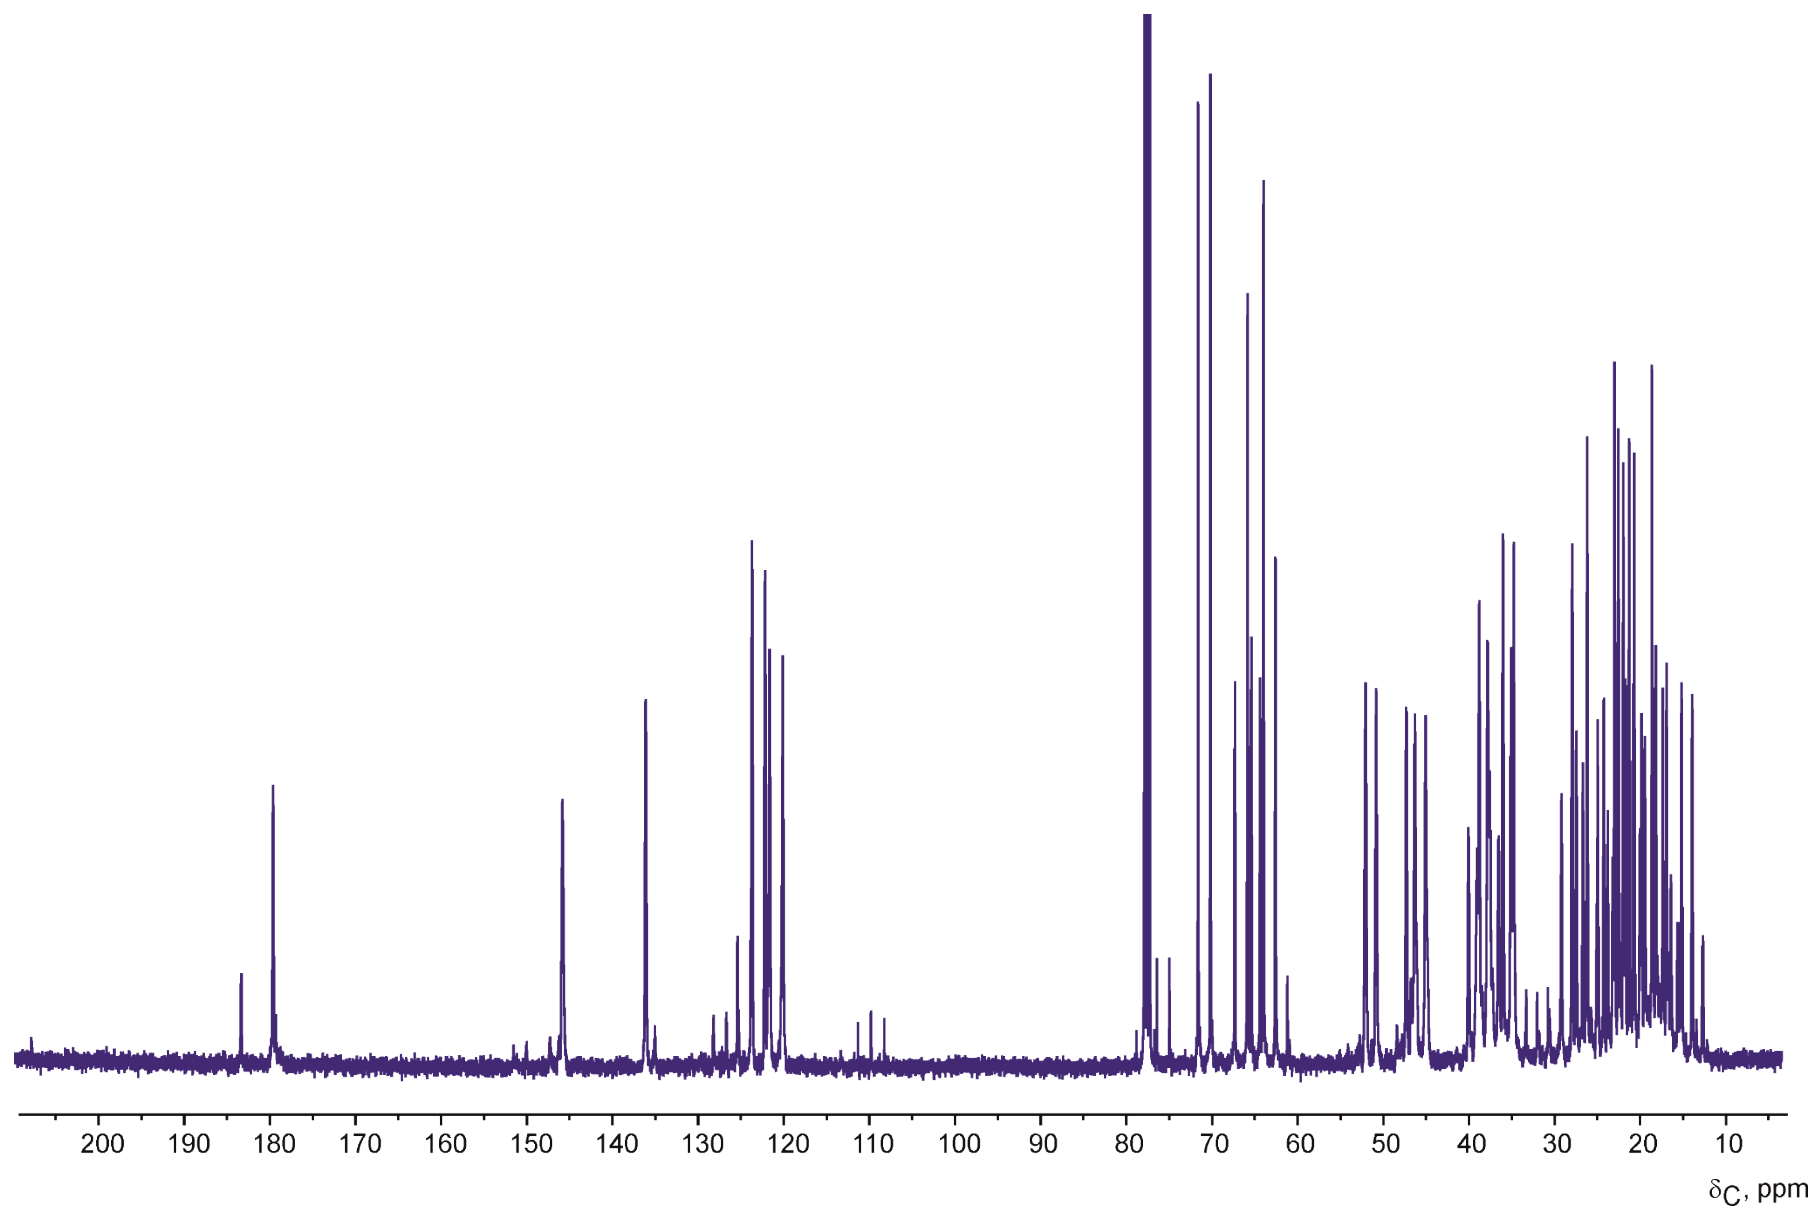

Figure S9.  $^{13}\text{C}$  NMR ( $\text{CDCl}_3$ , 100.6 MHz) spectrum of **1c**.

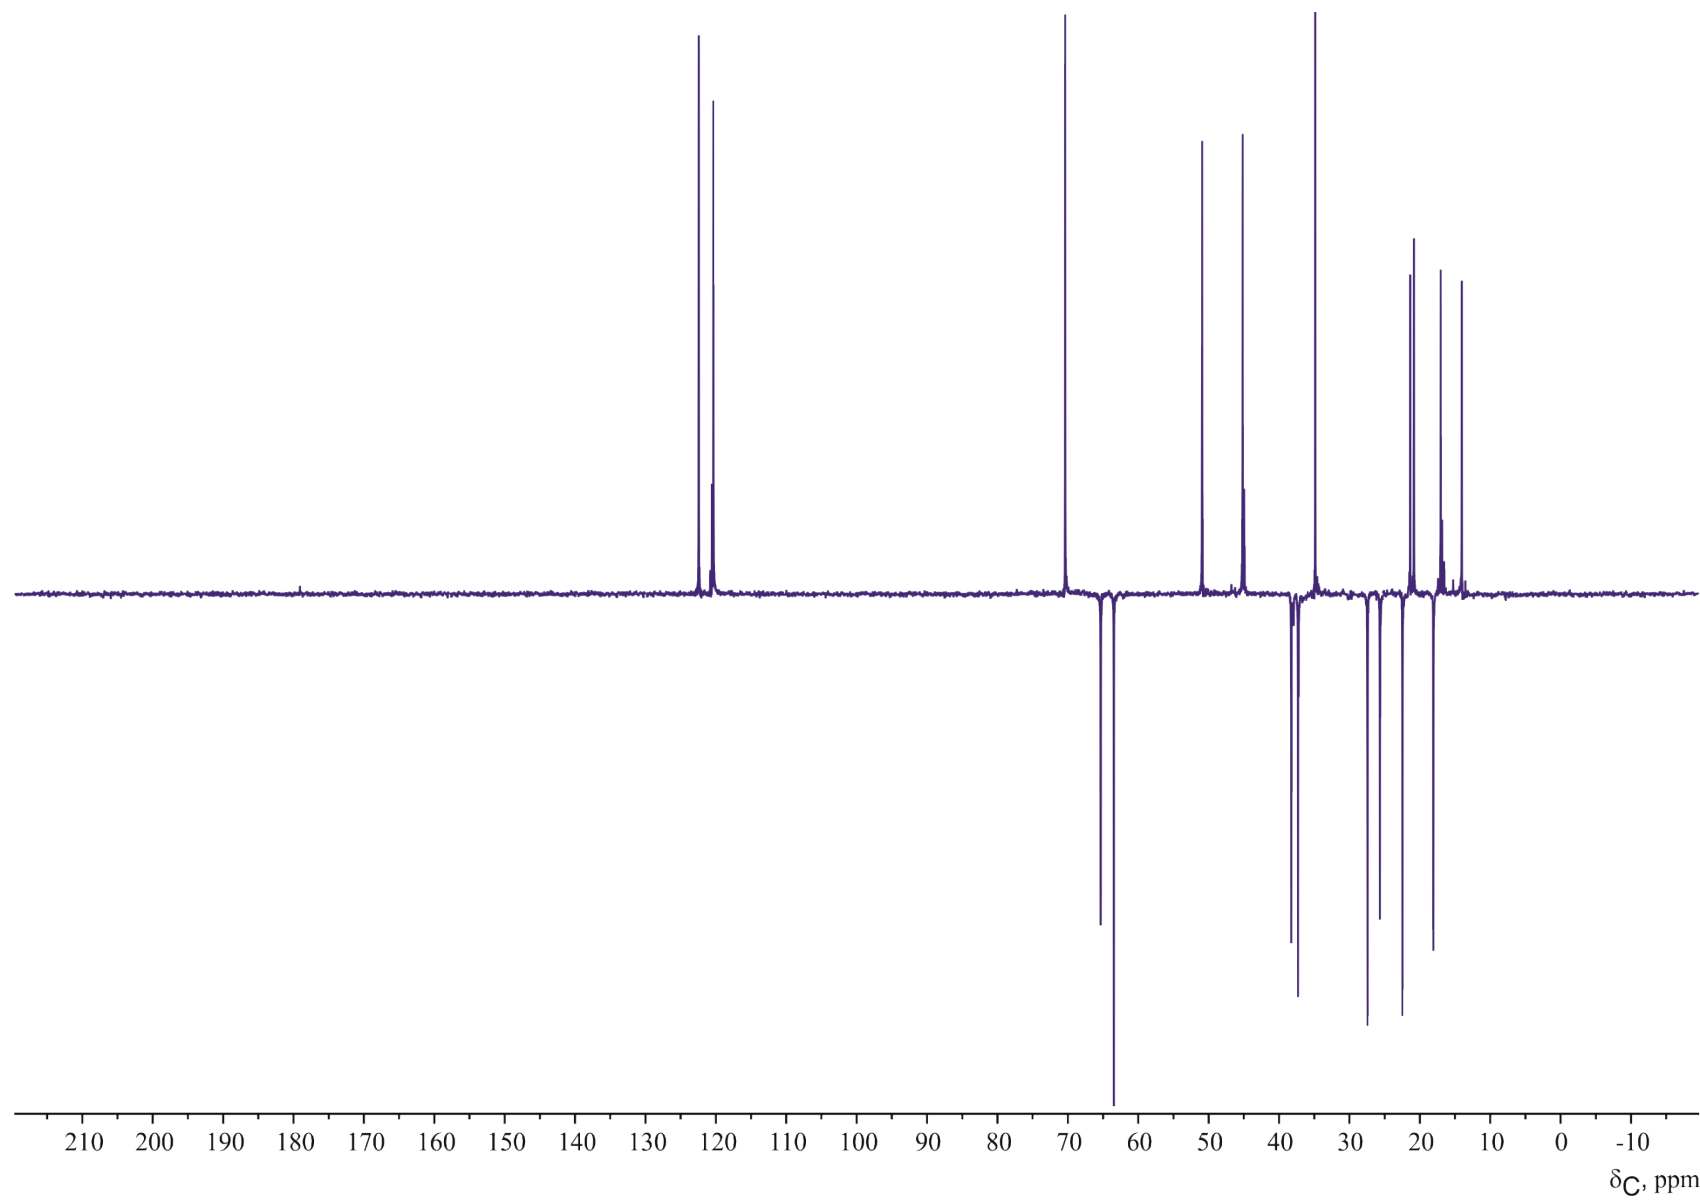

Figure S10.  $^{13}\text{C}$ - $\{^1\text{H}\}$  apt NMR ( $\text{CDCl}_3$ , 100.6 MHz) spectrum of **1c**.

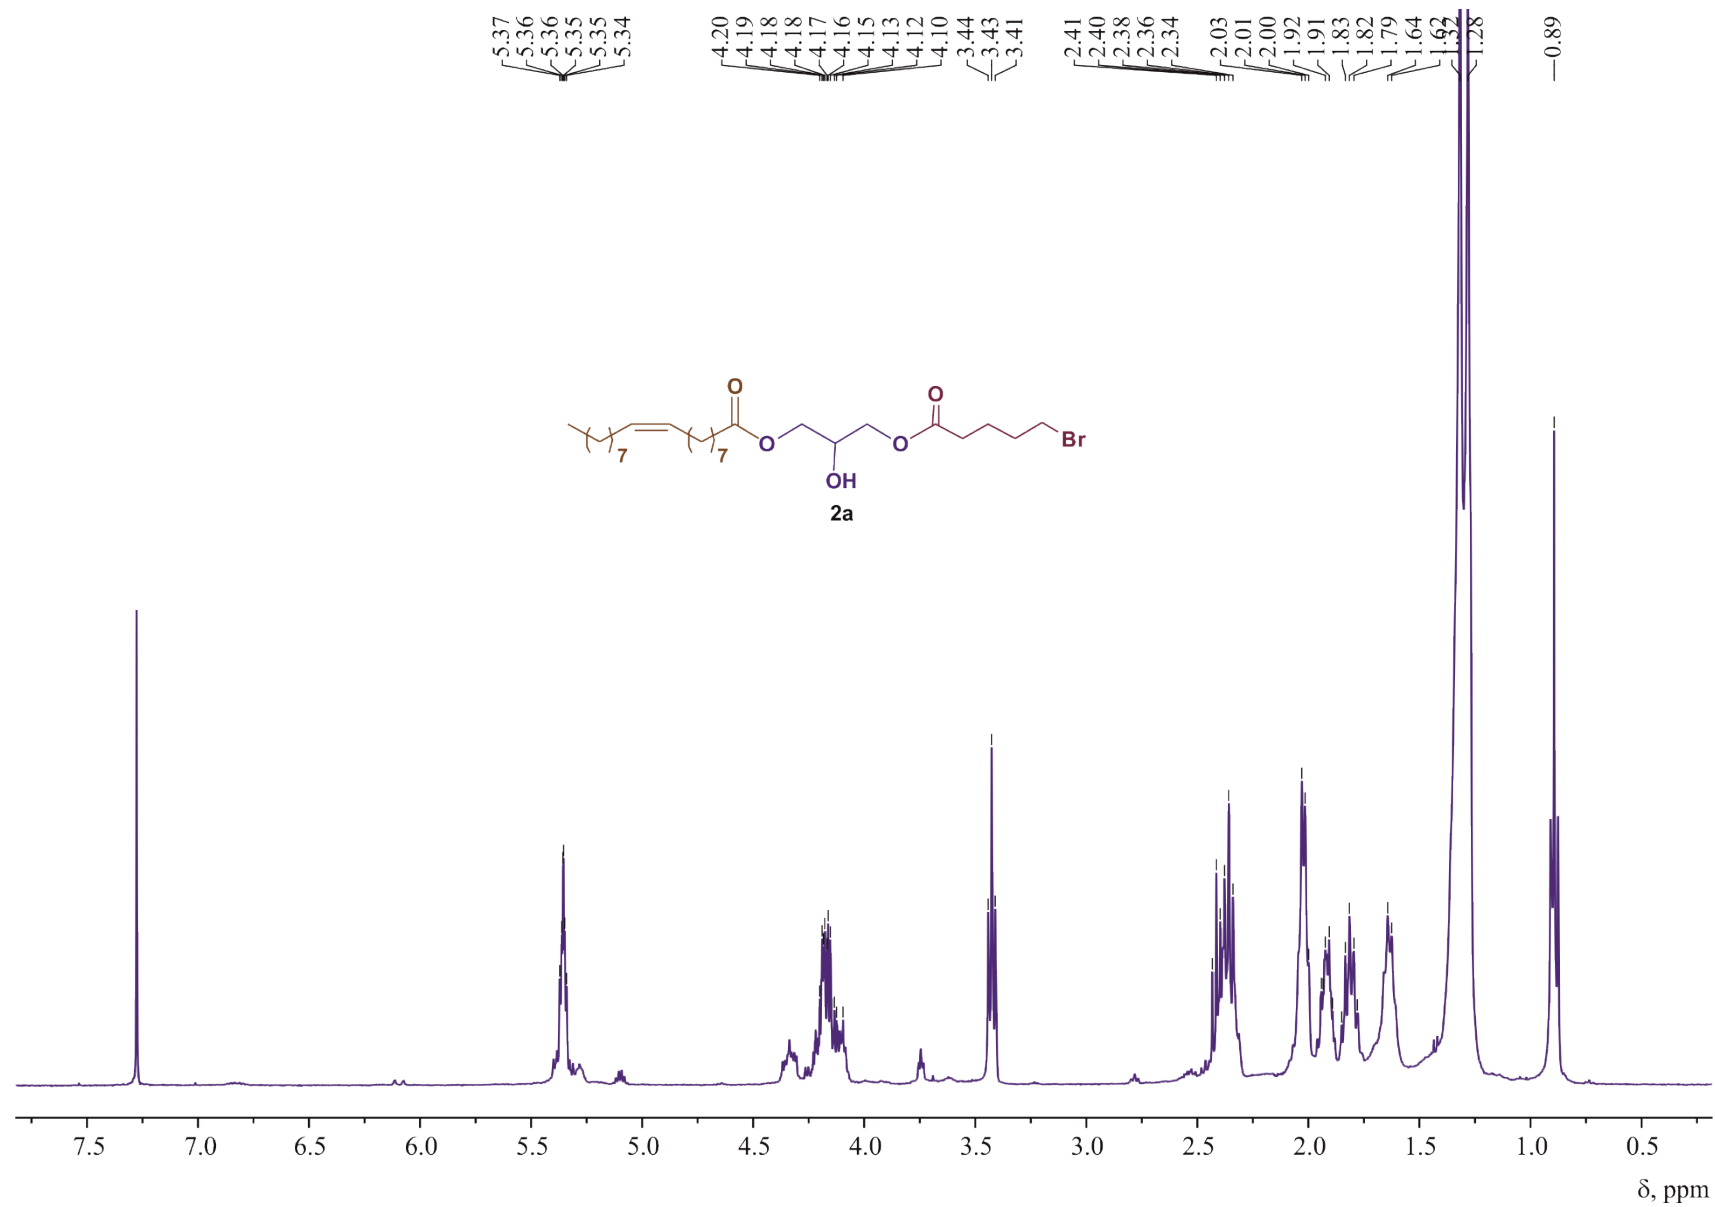

Figure S11. <sup>1</sup>H NMR spectrum (400 MHz, CDCl<sub>3</sub>) of compound **2a**.

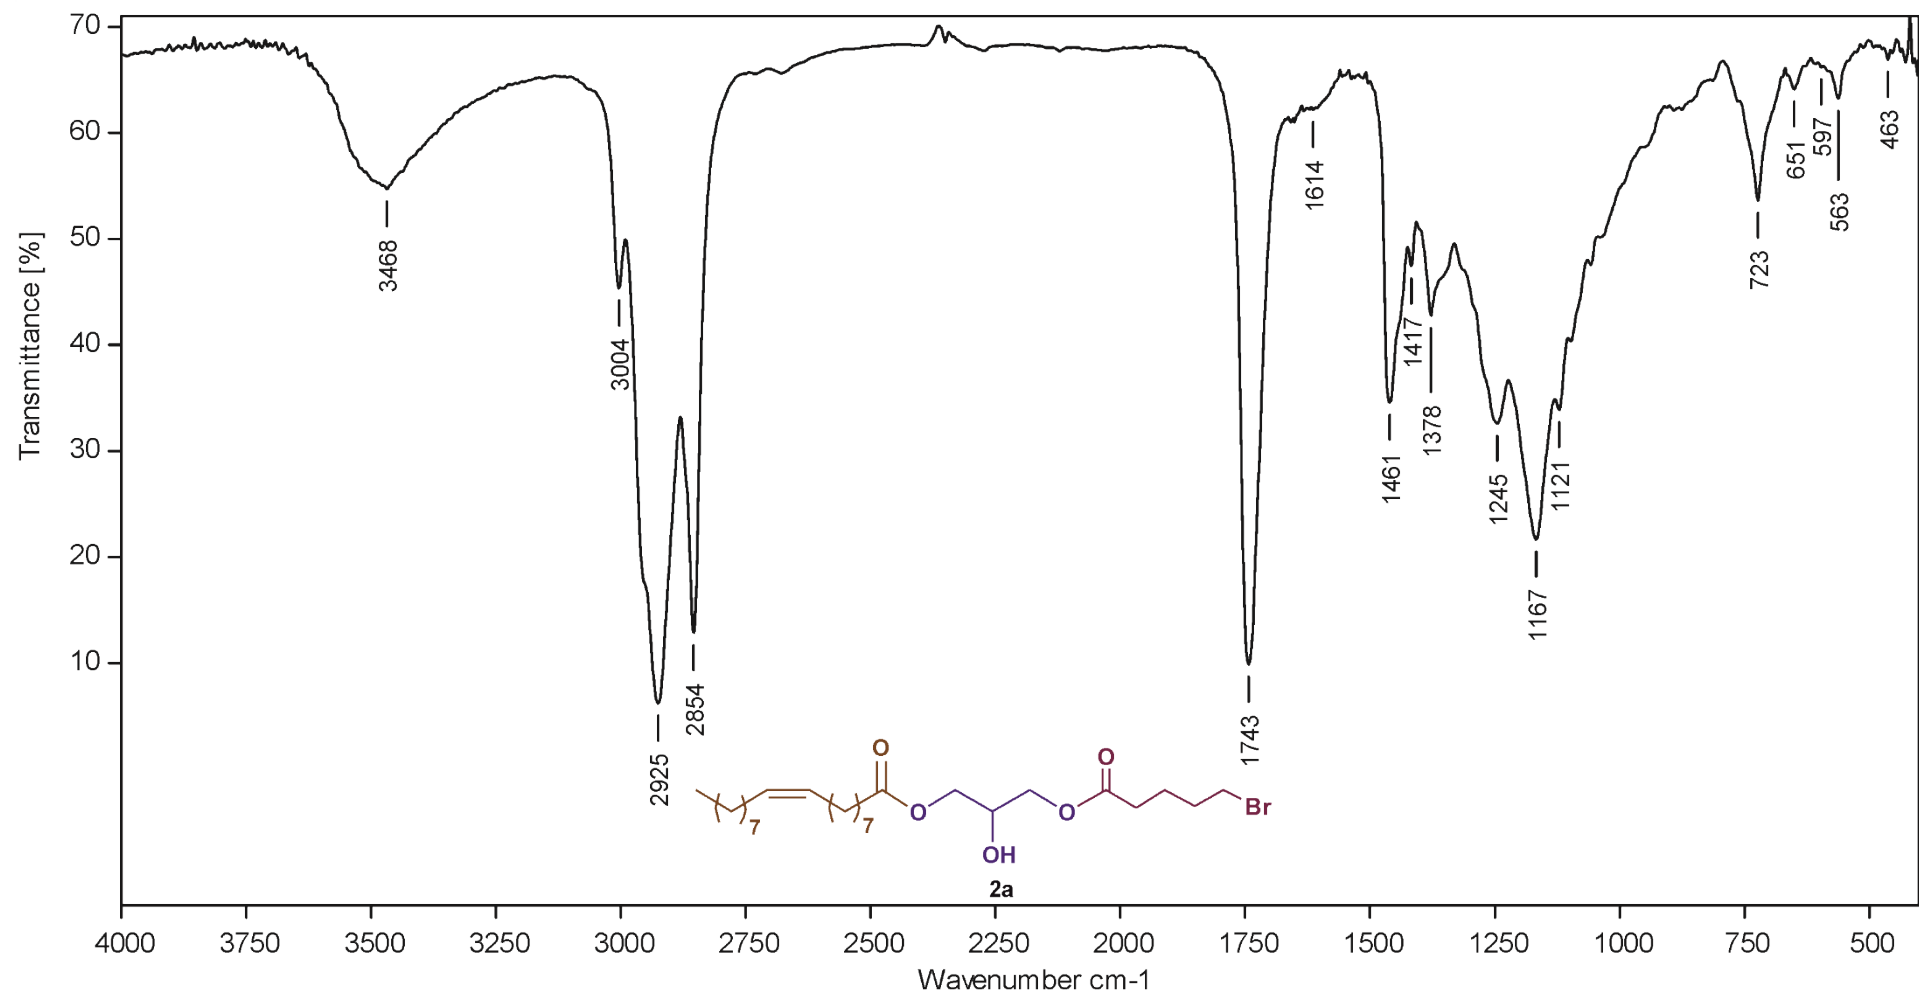

Figure S12. IR (KBr) spectrum of **2a**.



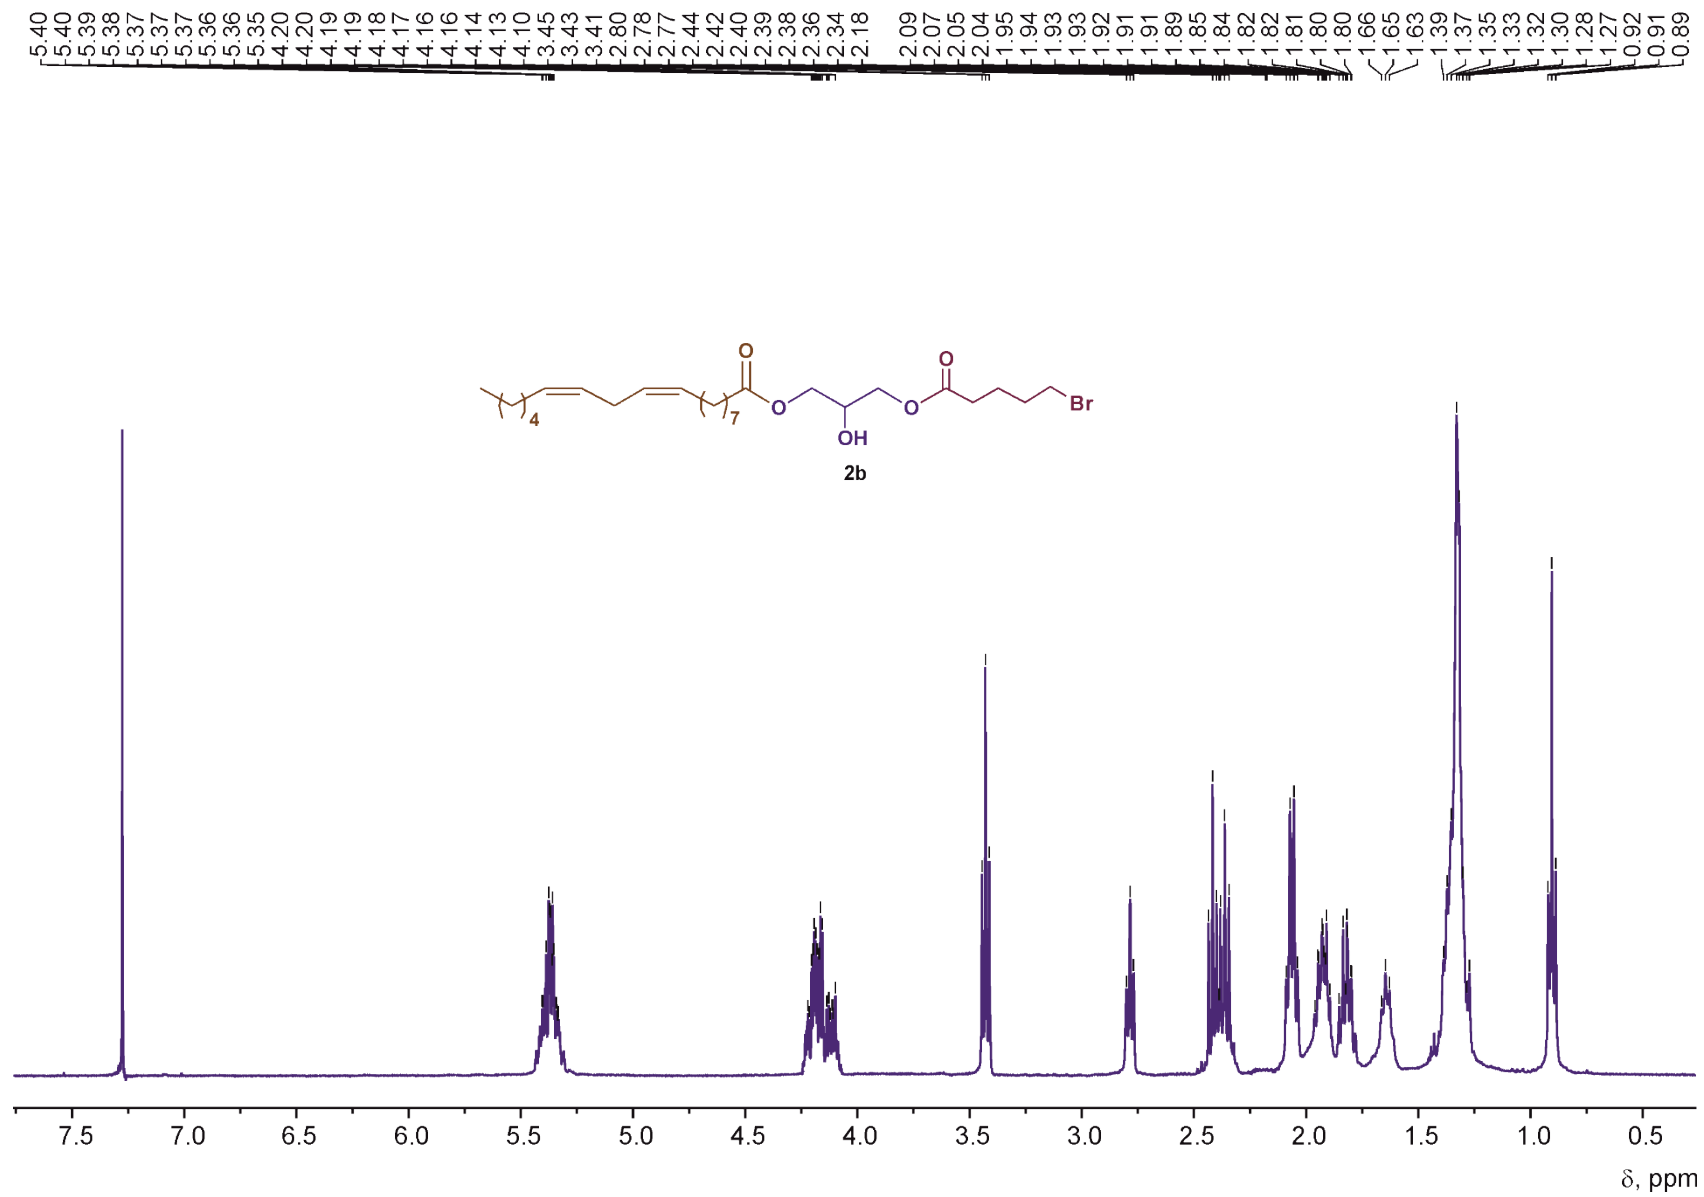

Figure S13. <sup>1</sup>H NMR spectrum (400 MHz, CDCl<sub>3</sub>) of compound **2b**.

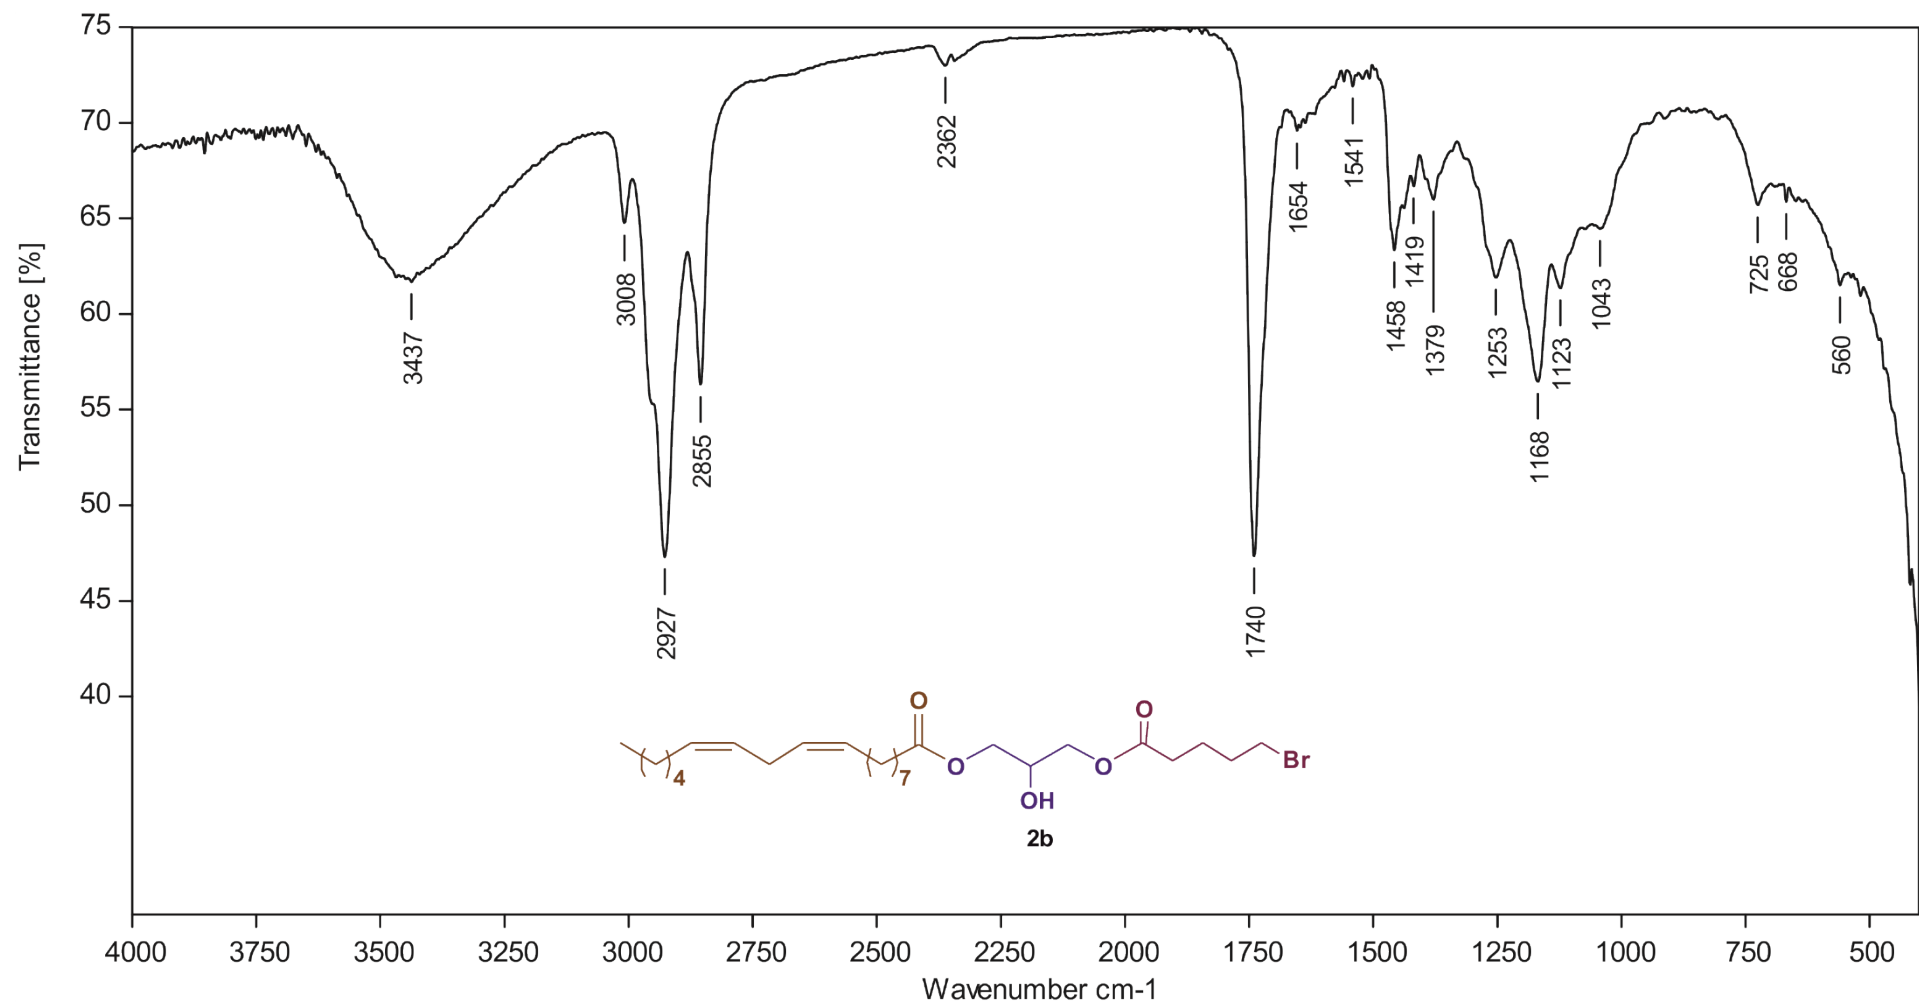

Figure S14. IR (KBr) spectrum of **2b**.

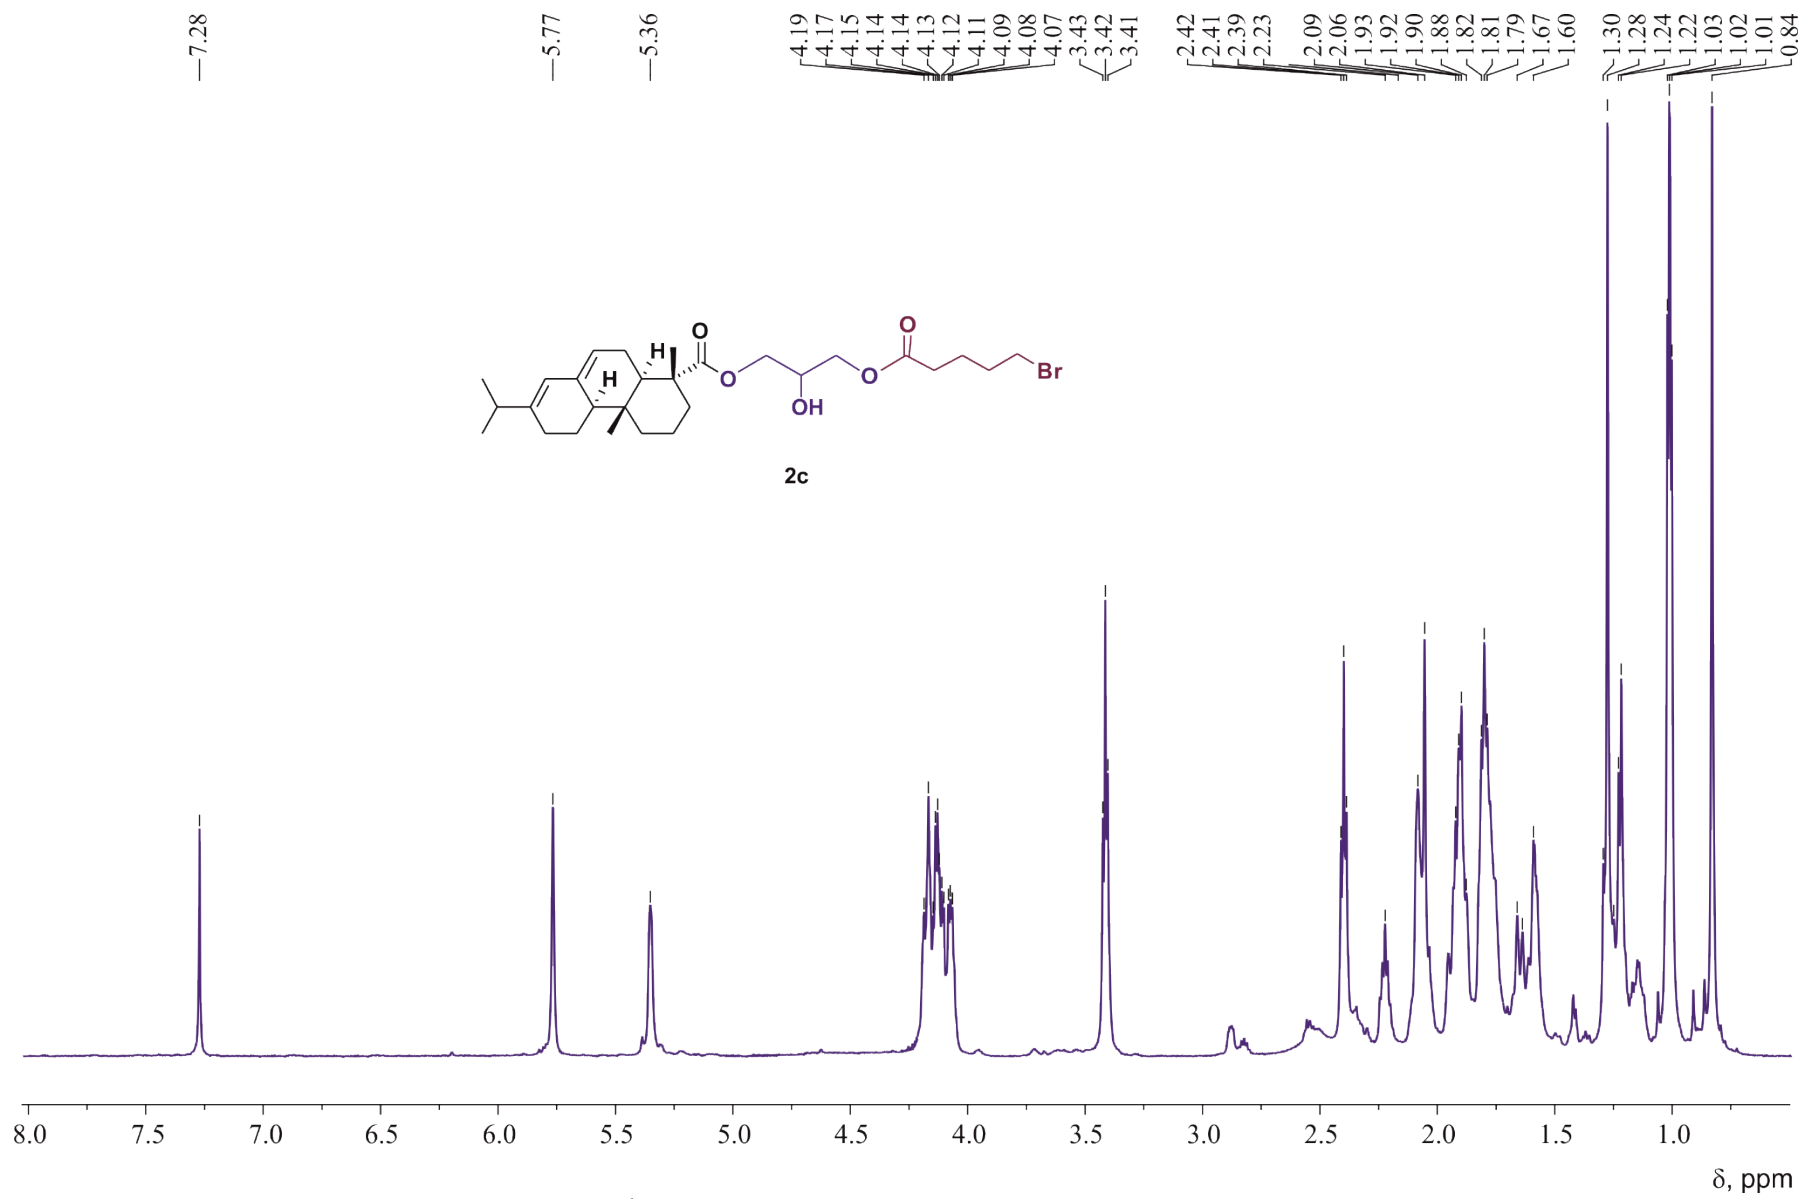

Figure S15. <sup>1</sup>H NMR spectrum (400 MHz, CDCl<sub>3</sub>) of compound **2c**.

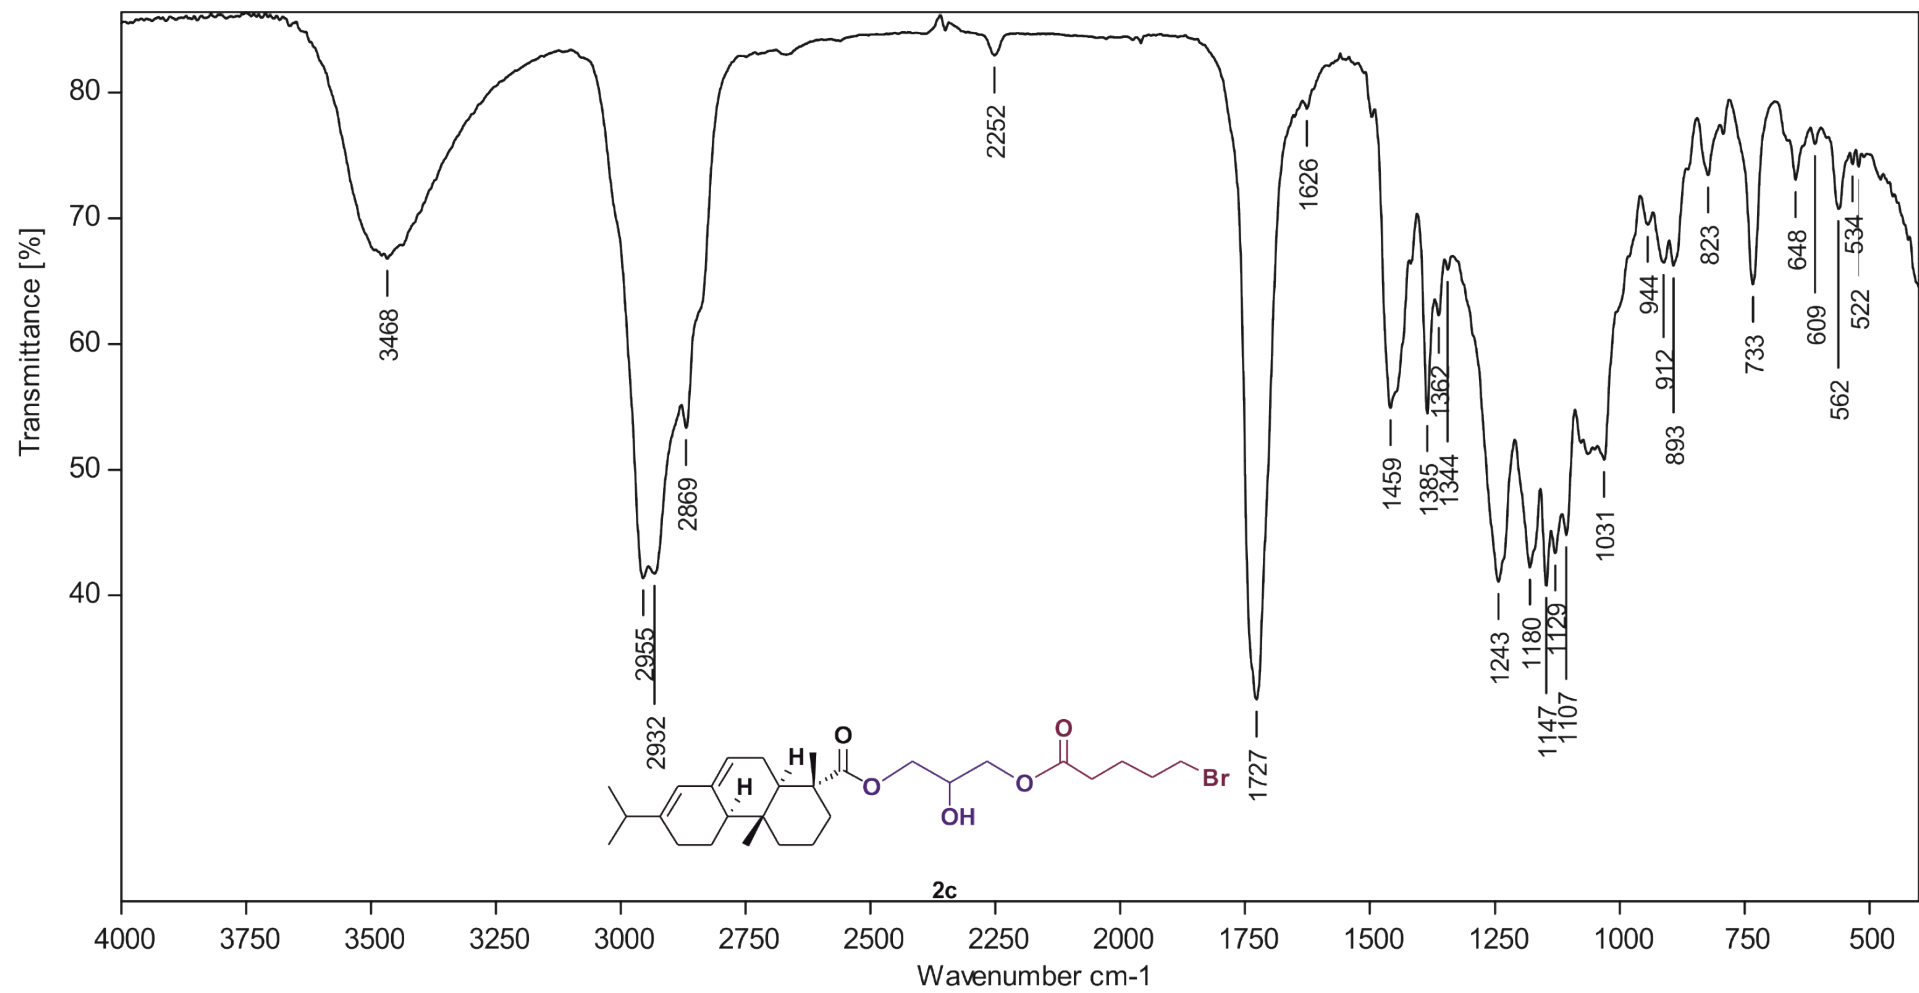

Figure S16. IR (KBr) spectrum of **2c**.

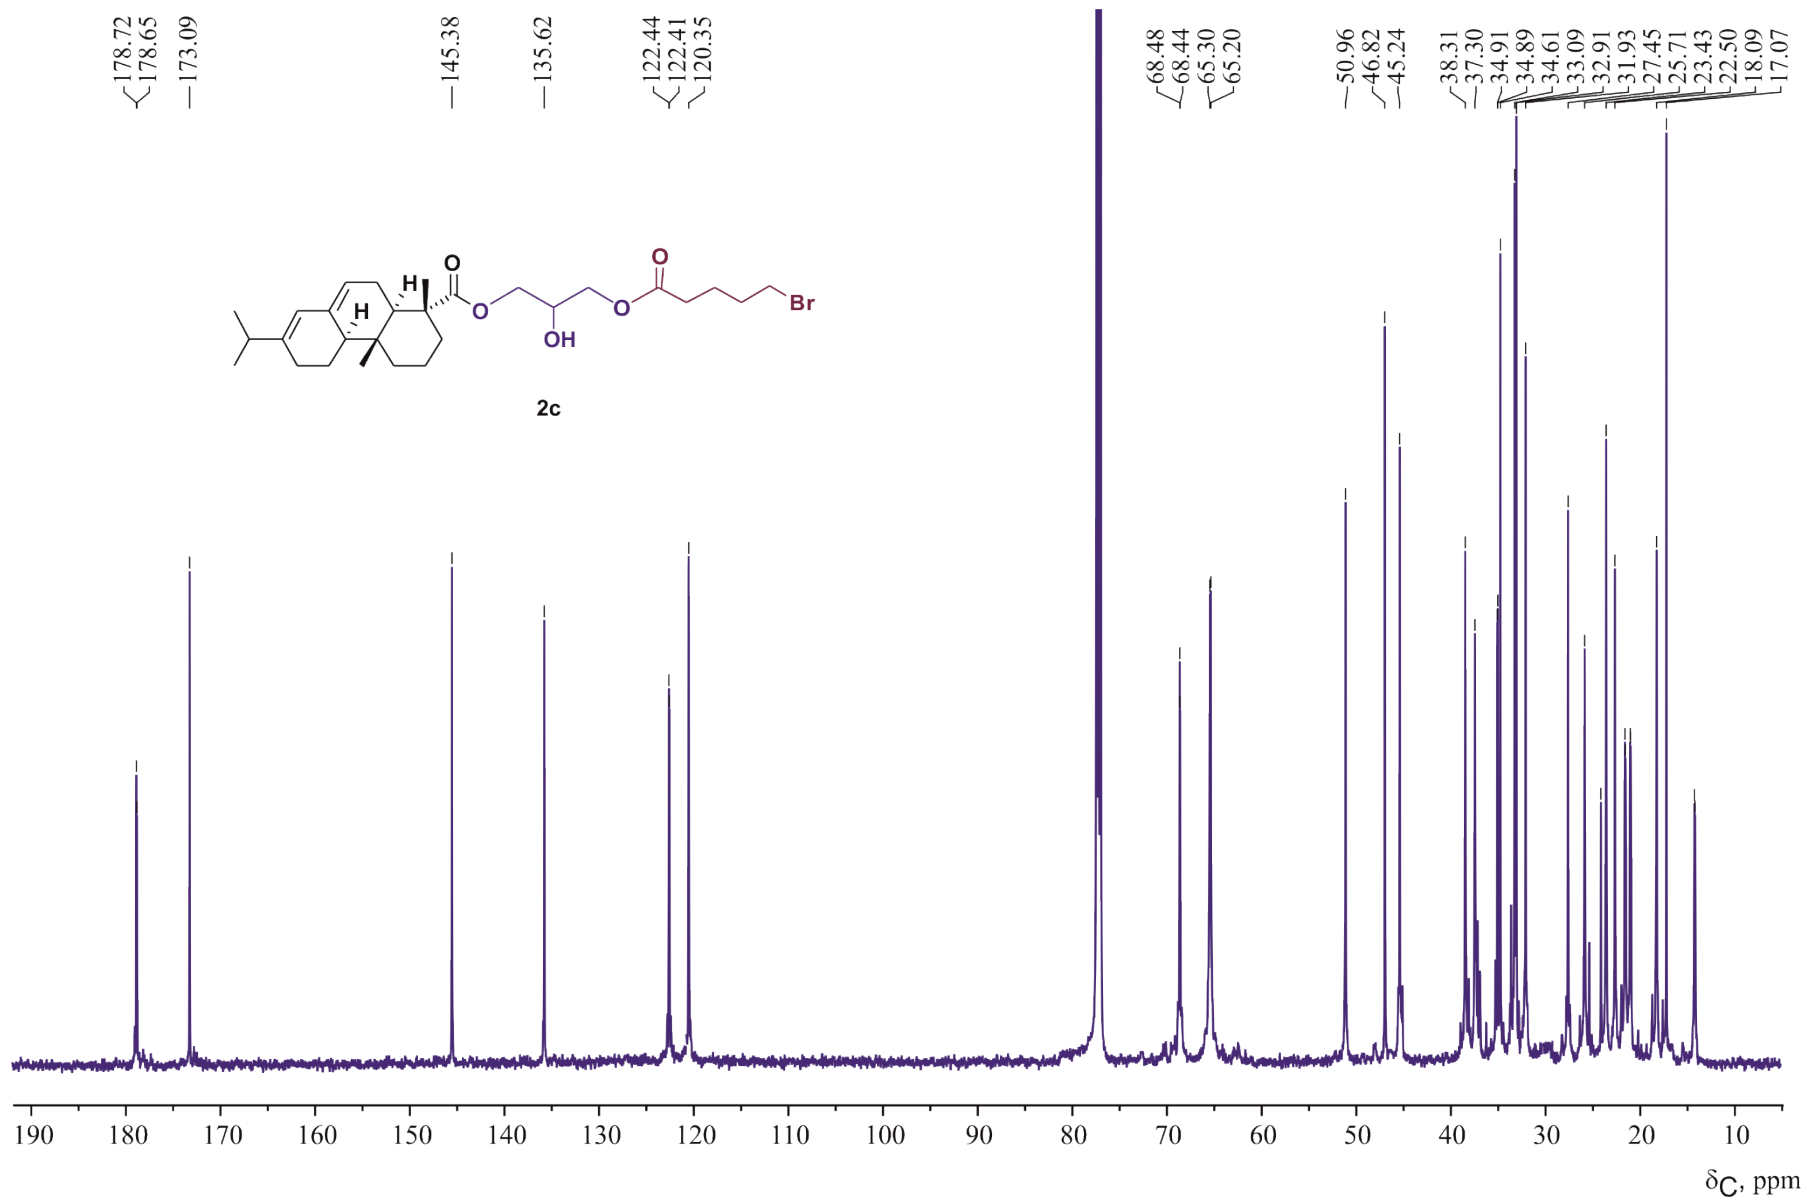

Figure S17.  $^{13}\text{C}\{-^1\text{H}\}$  NMR ( $\text{CDCl}_3$ , 100.6 MHz) spectrum of **2c**.

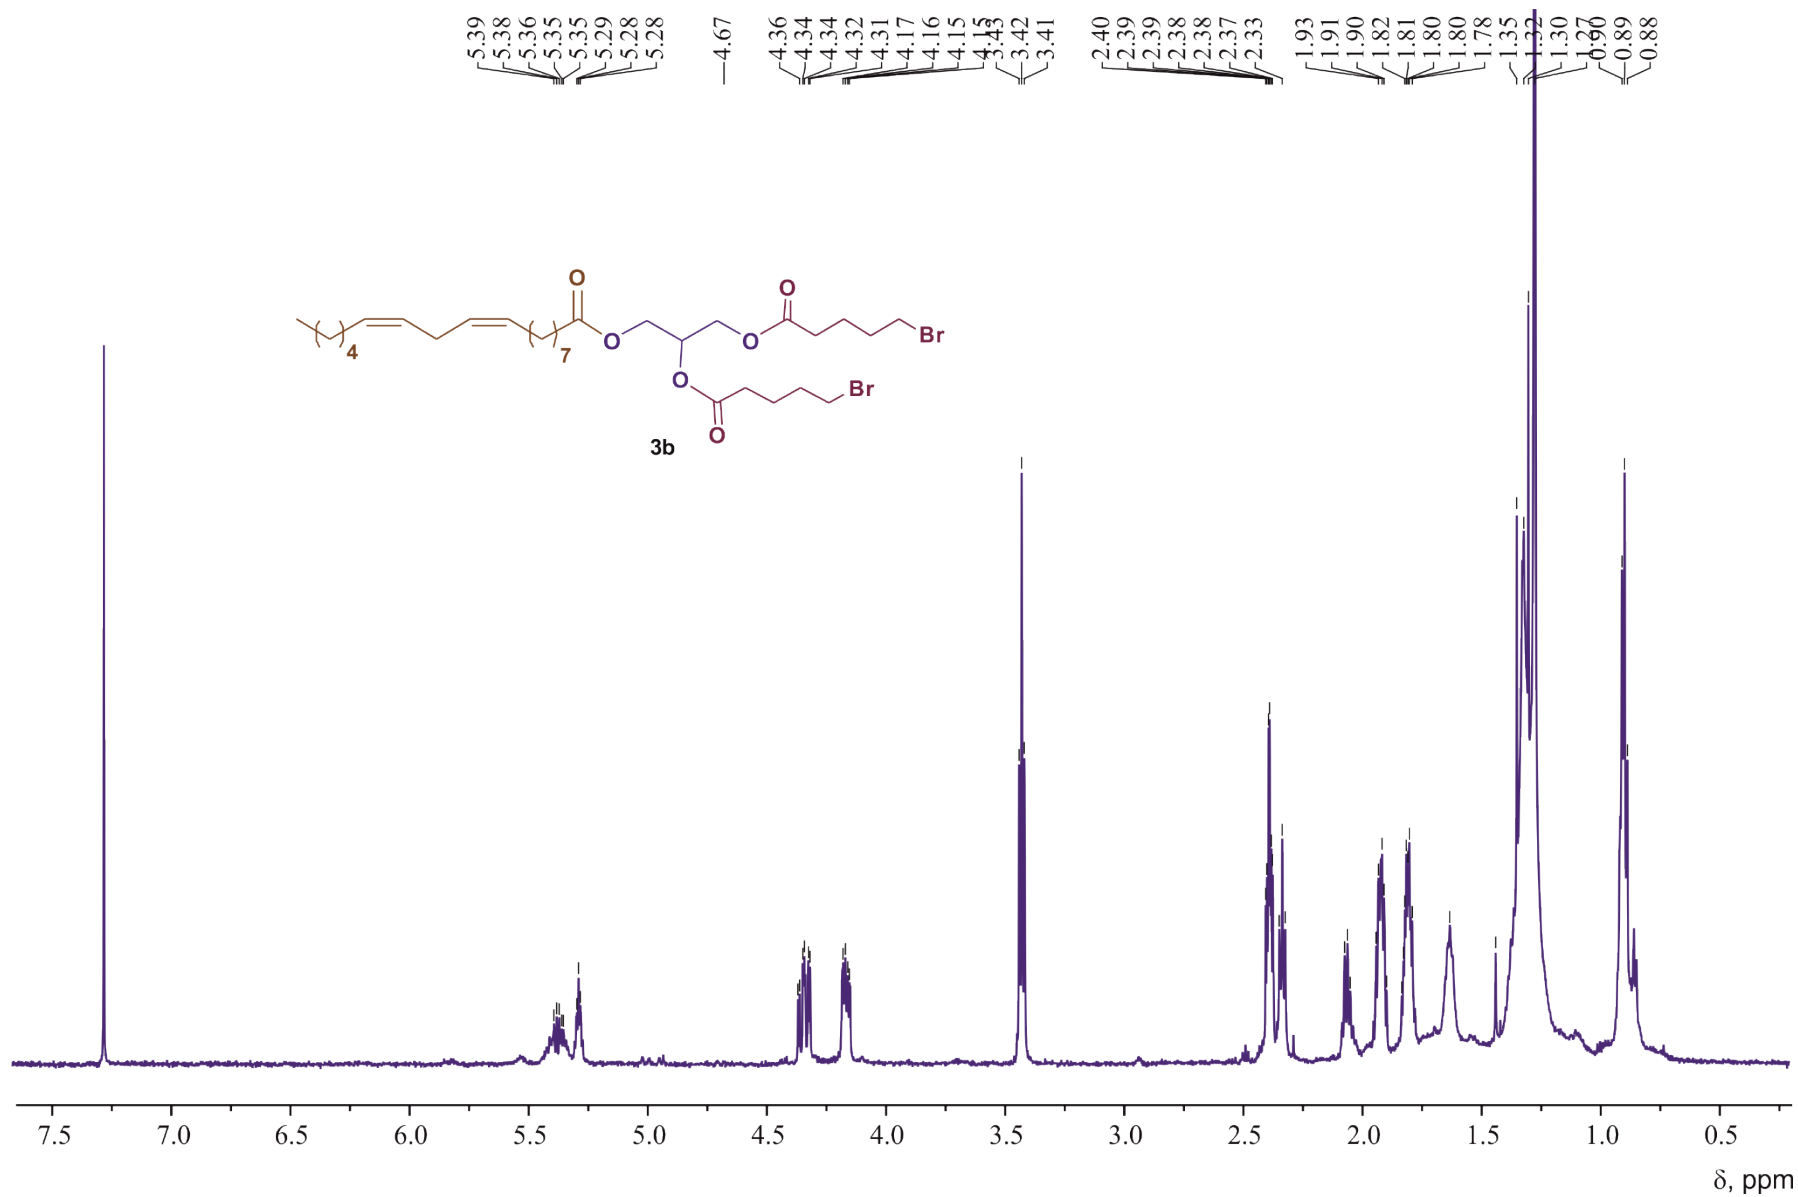

Figure S18. <sup>1</sup>H NMR spectrum (400 MHz, CDCl<sub>3</sub>) of compound **3b**.

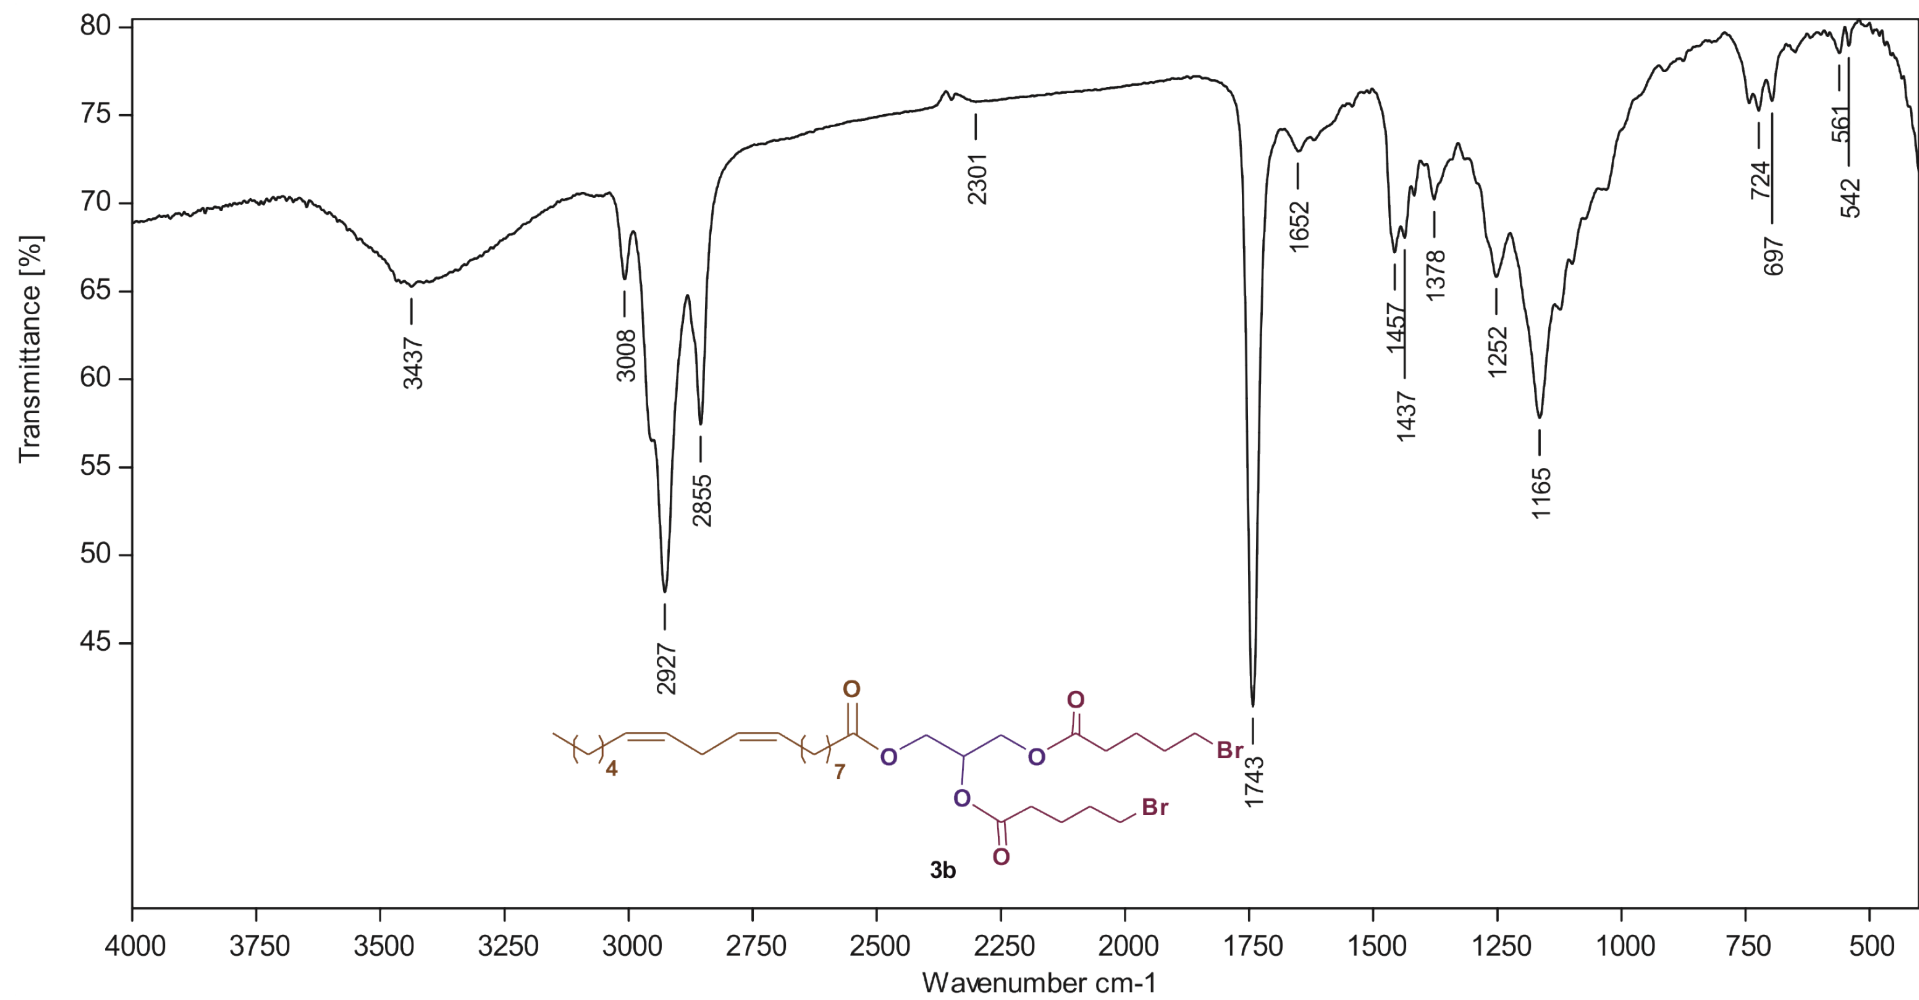

Figure S19. IR (KBr) spectrum of **3b**.

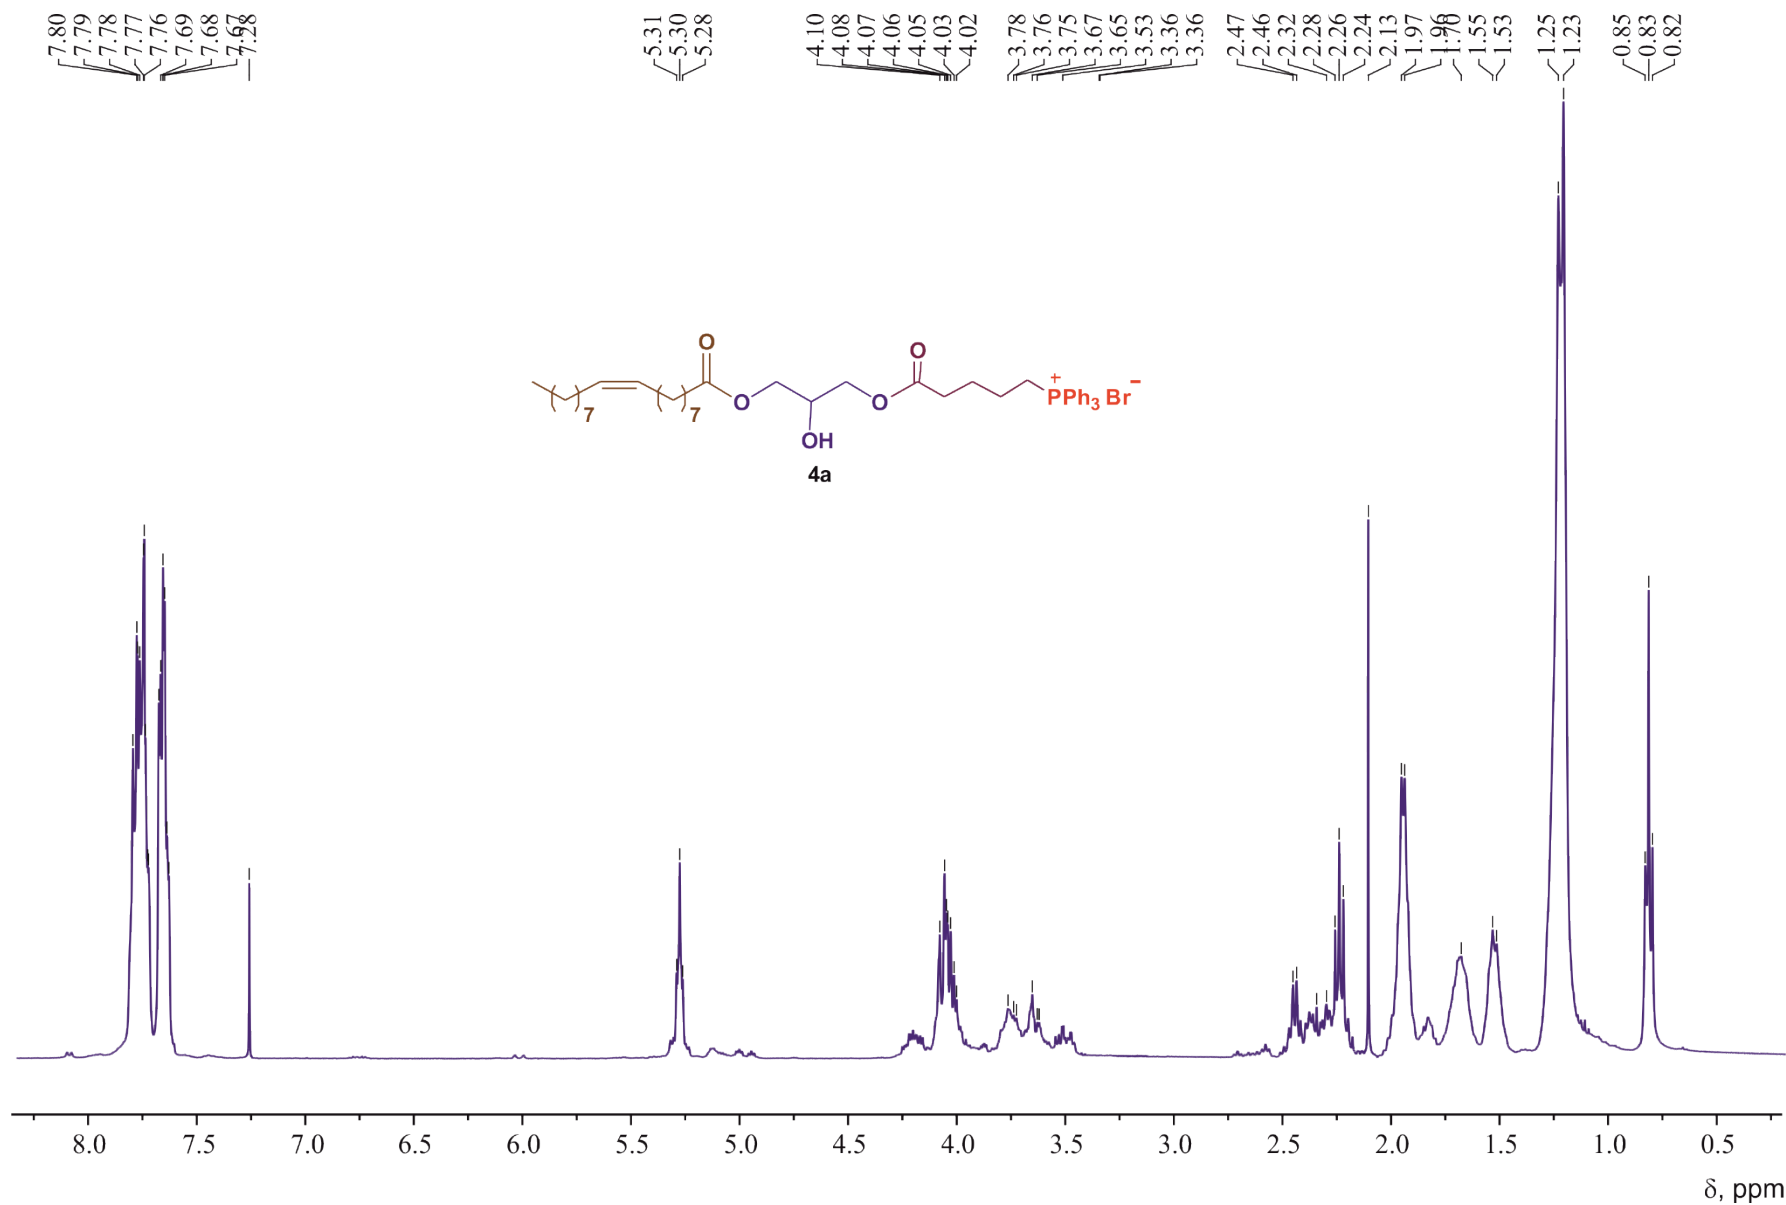

Figure S20.  $^1\text{H}$  NMR spectrum (400 MHz,  $\text{CDCl}_3$ ) of compound **4a**.



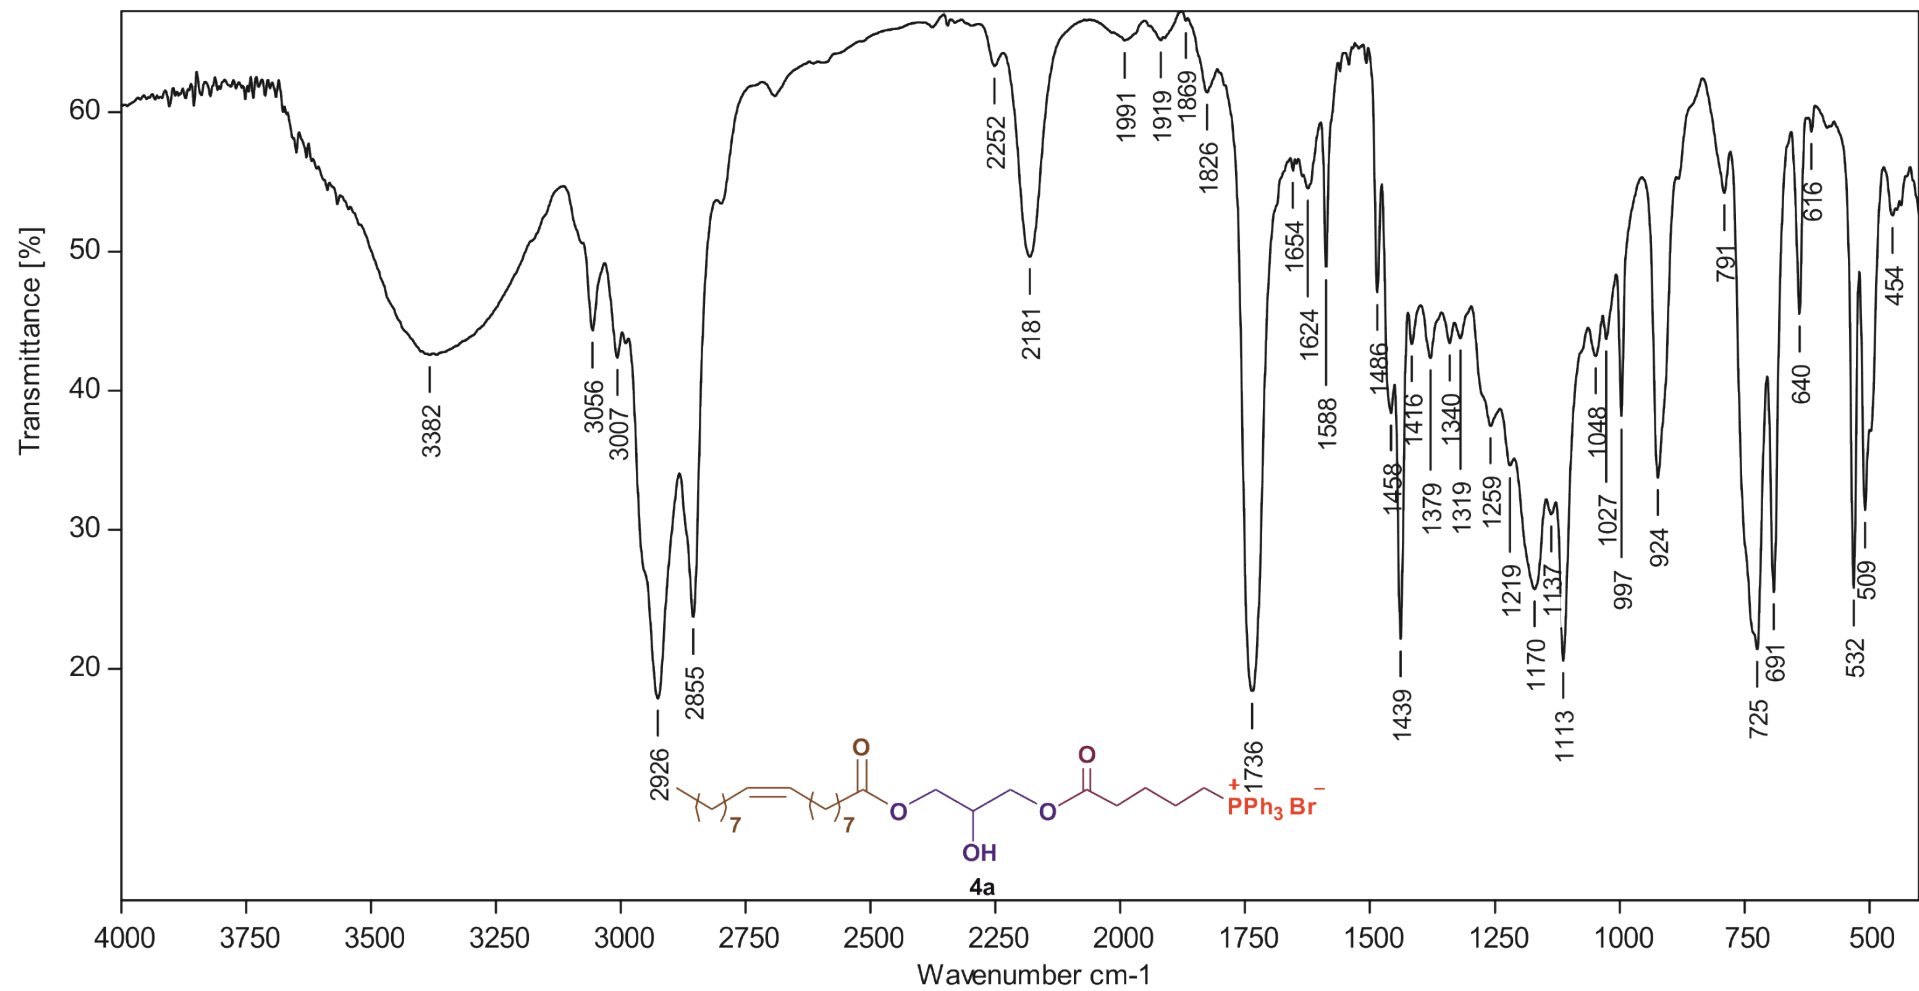

Figure S21. IR (KBr) spectrum of **4a**.

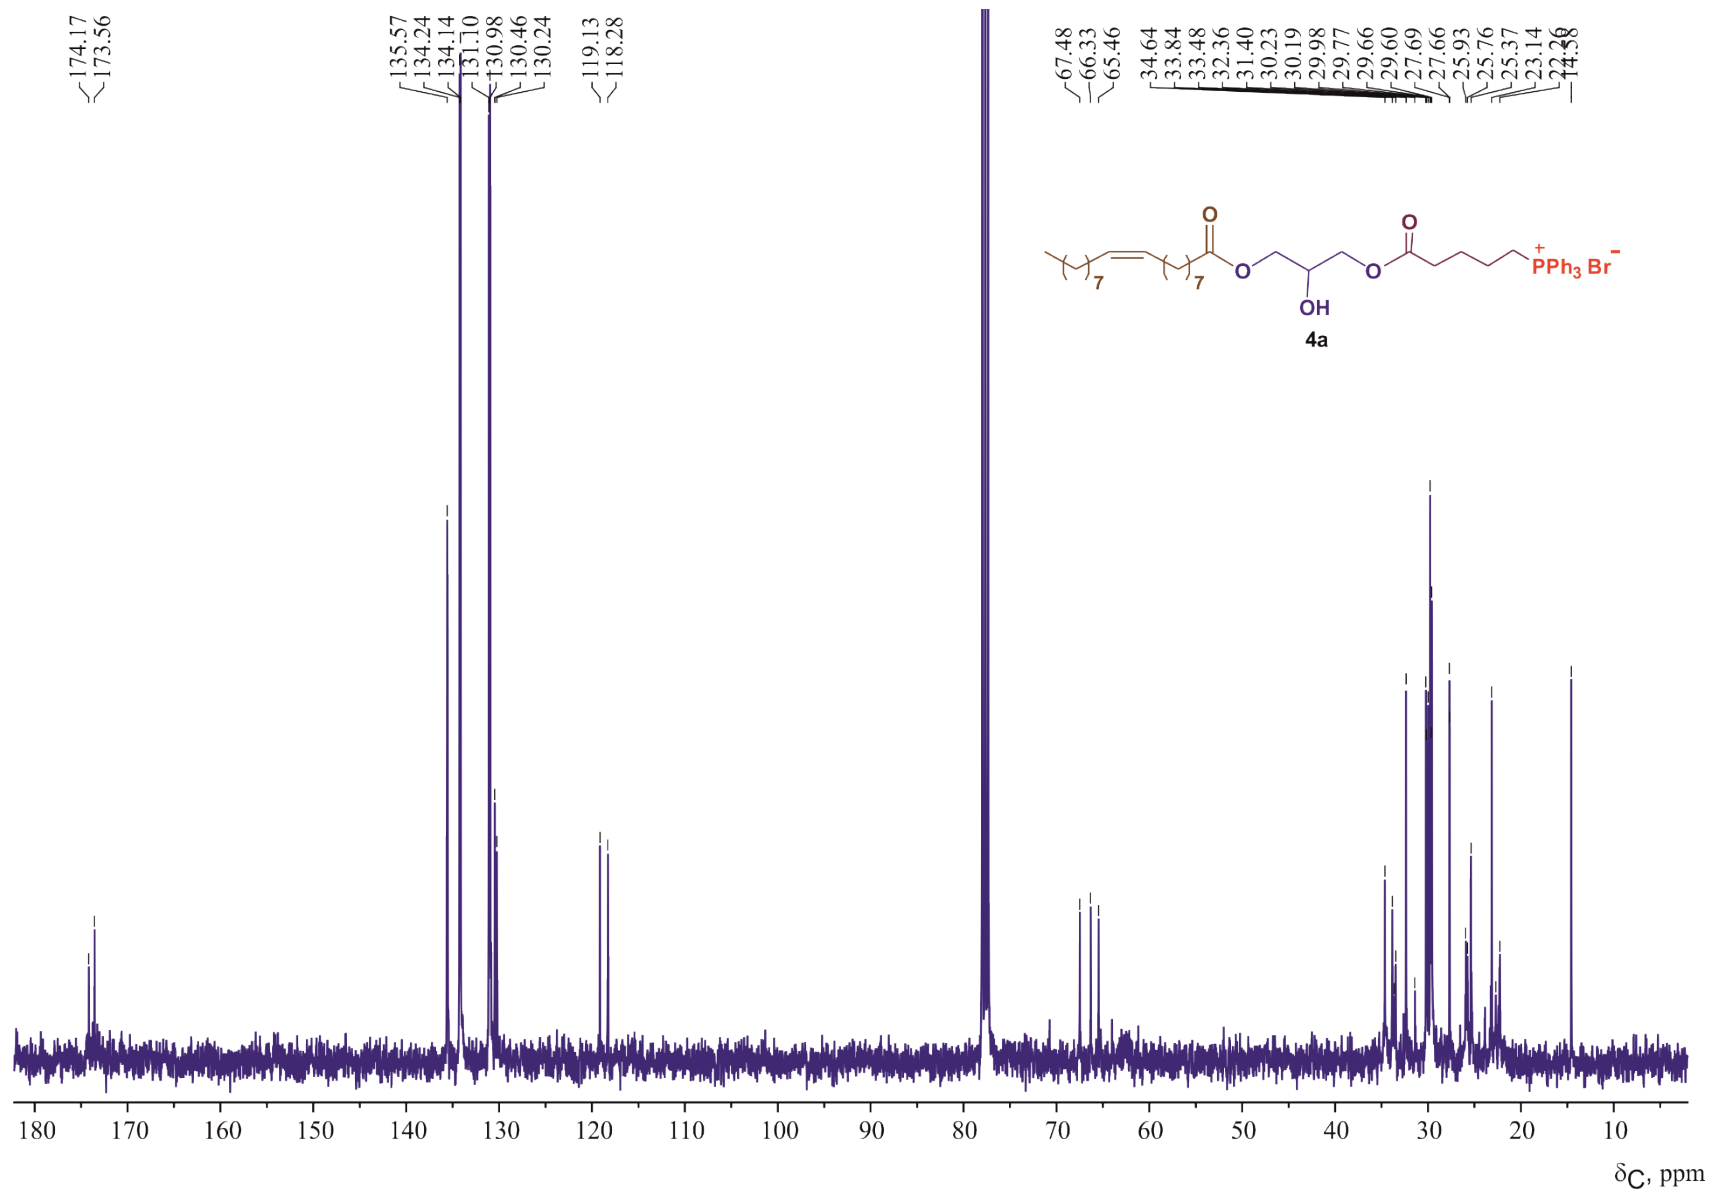

Figure S22. <sup>13</sup>C-<sup>1</sup>H NMR (CDCl<sub>3</sub>, 100.6 MHz) spectrum of **4a**.

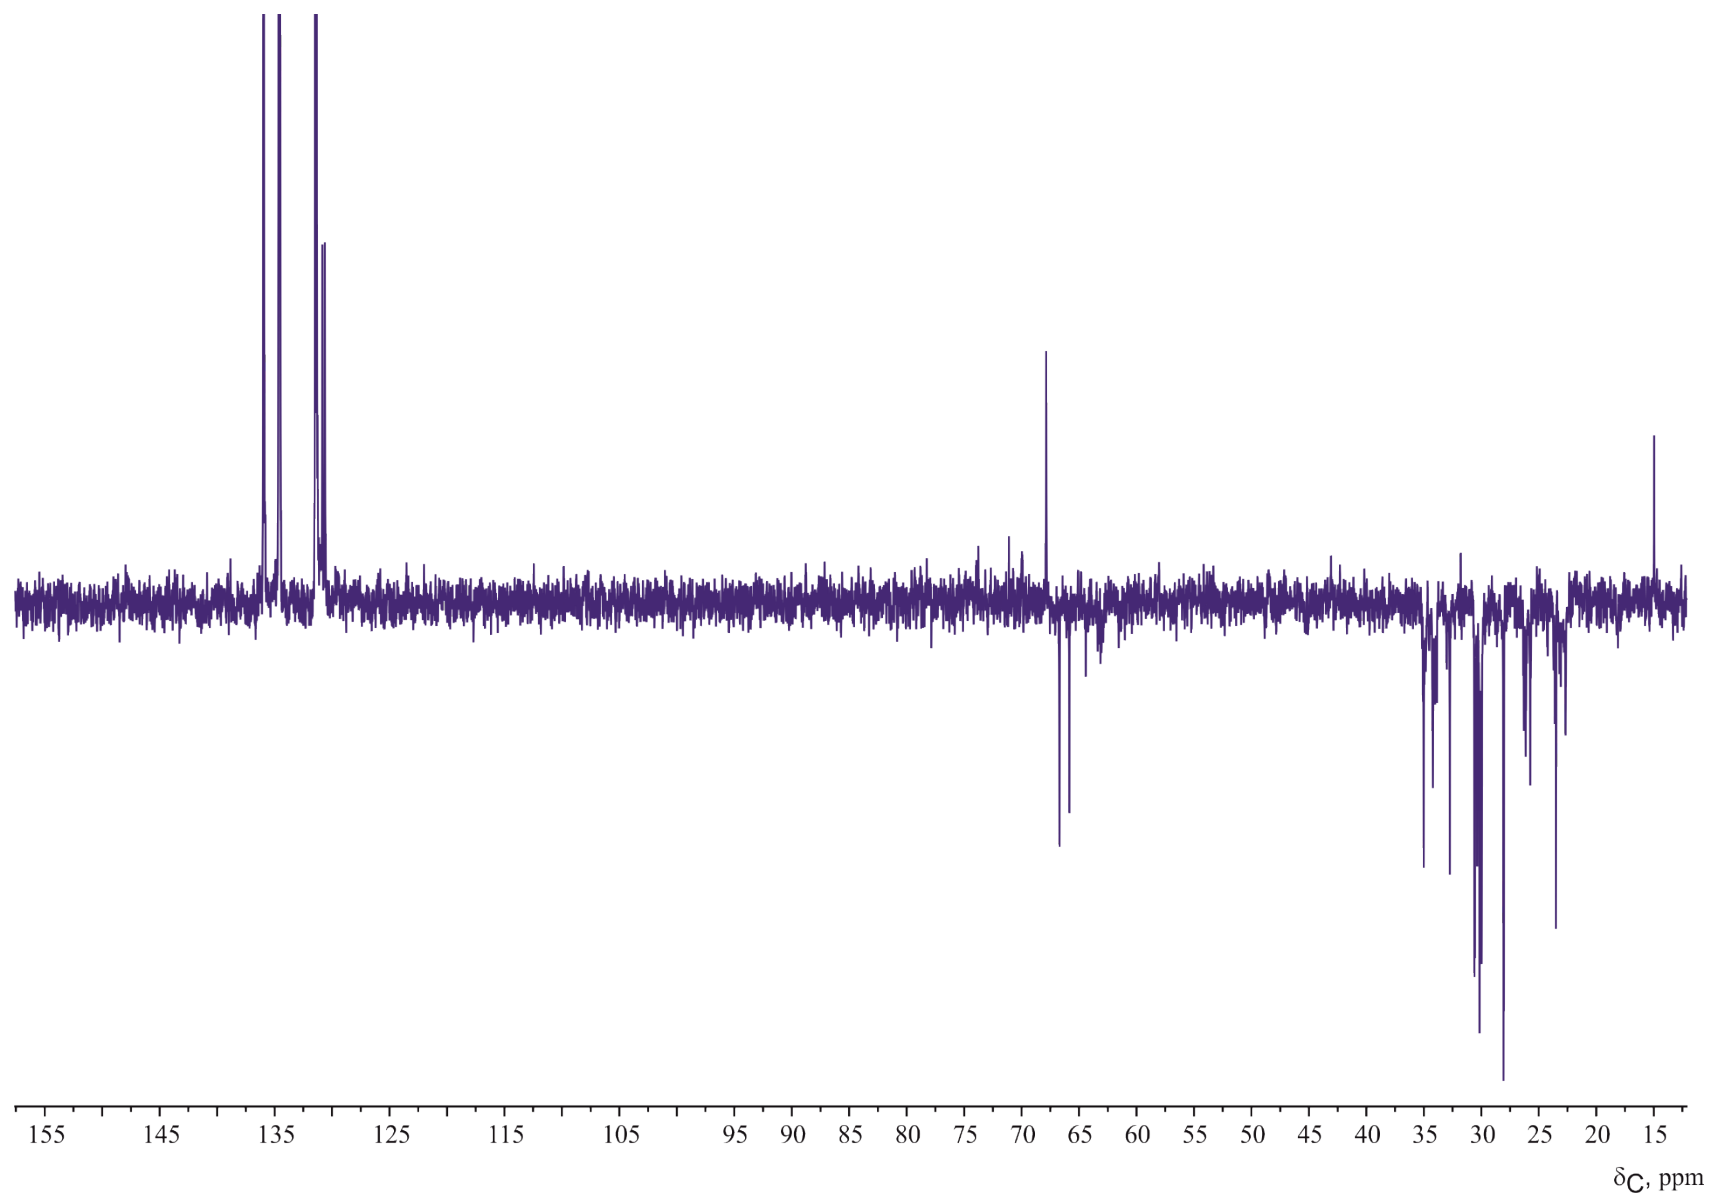

Figure S23.  $^{13}\text{C}$ - $\{^1\text{H}\}$  apt NMR ( $\text{CDCl}_3$ , 100.6 MHz) spectrum of **4a**.

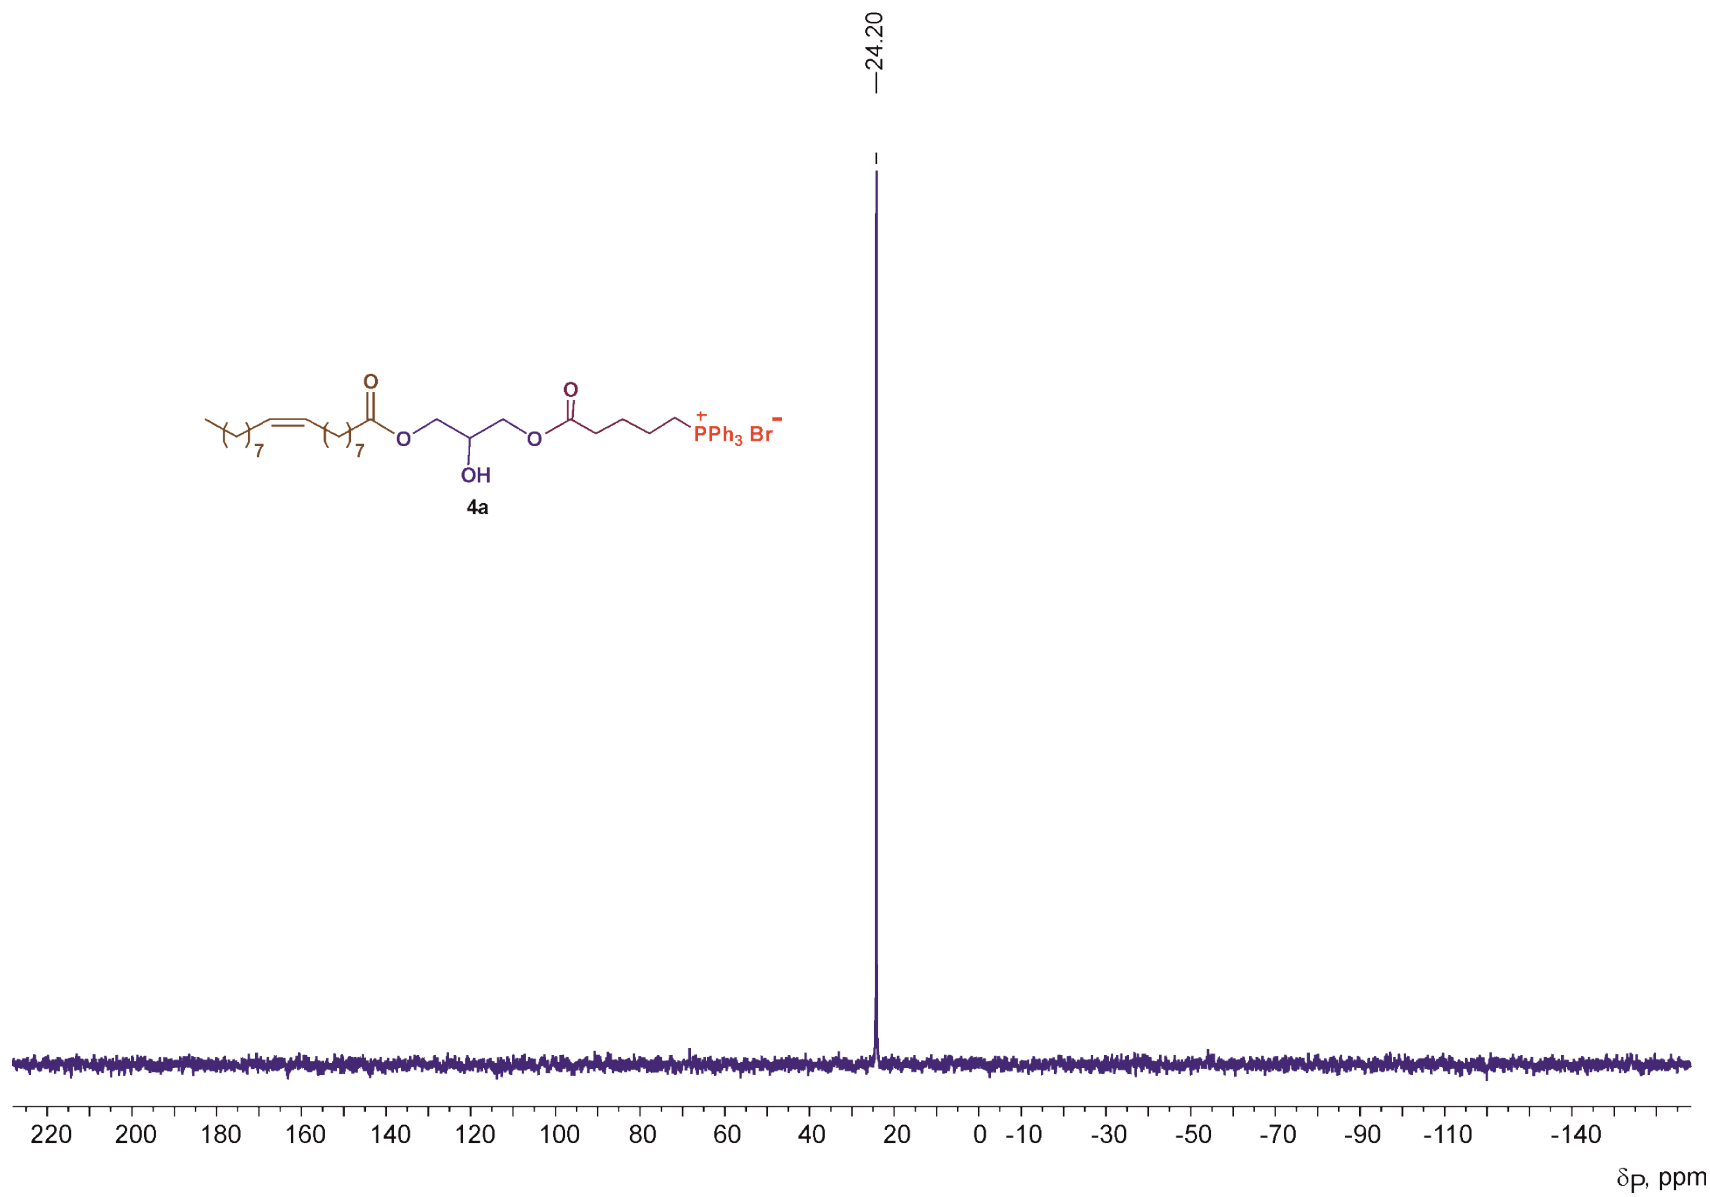

Figure S24.  $^{31}\text{P}\{-^1\text{H}\}$  NMR ( $\text{CDCl}_3$ , 162 MHz) spectrum of **4a**.

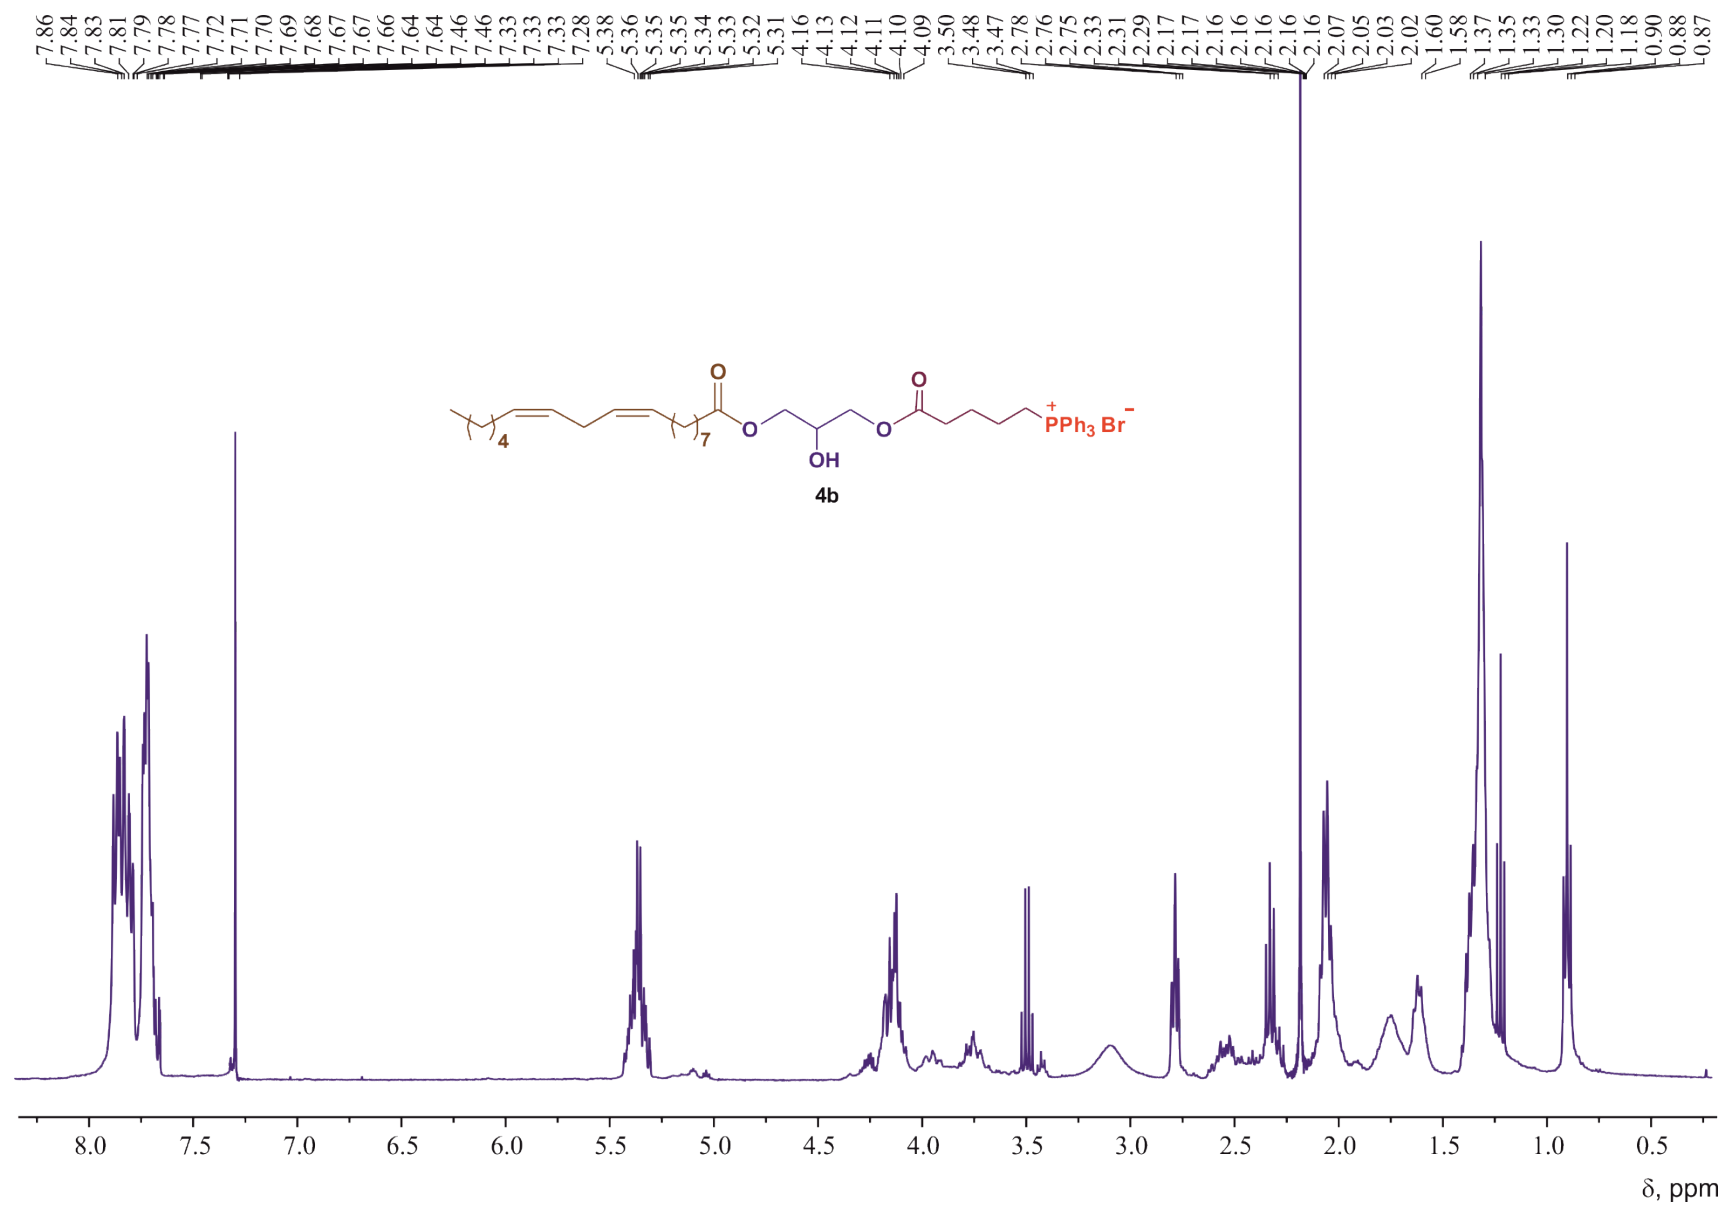

Figure S25.  $^1\text{H}$  NMR spectrum (400 MHz,  $\text{CDCl}_3$ ) of compound **4b**.

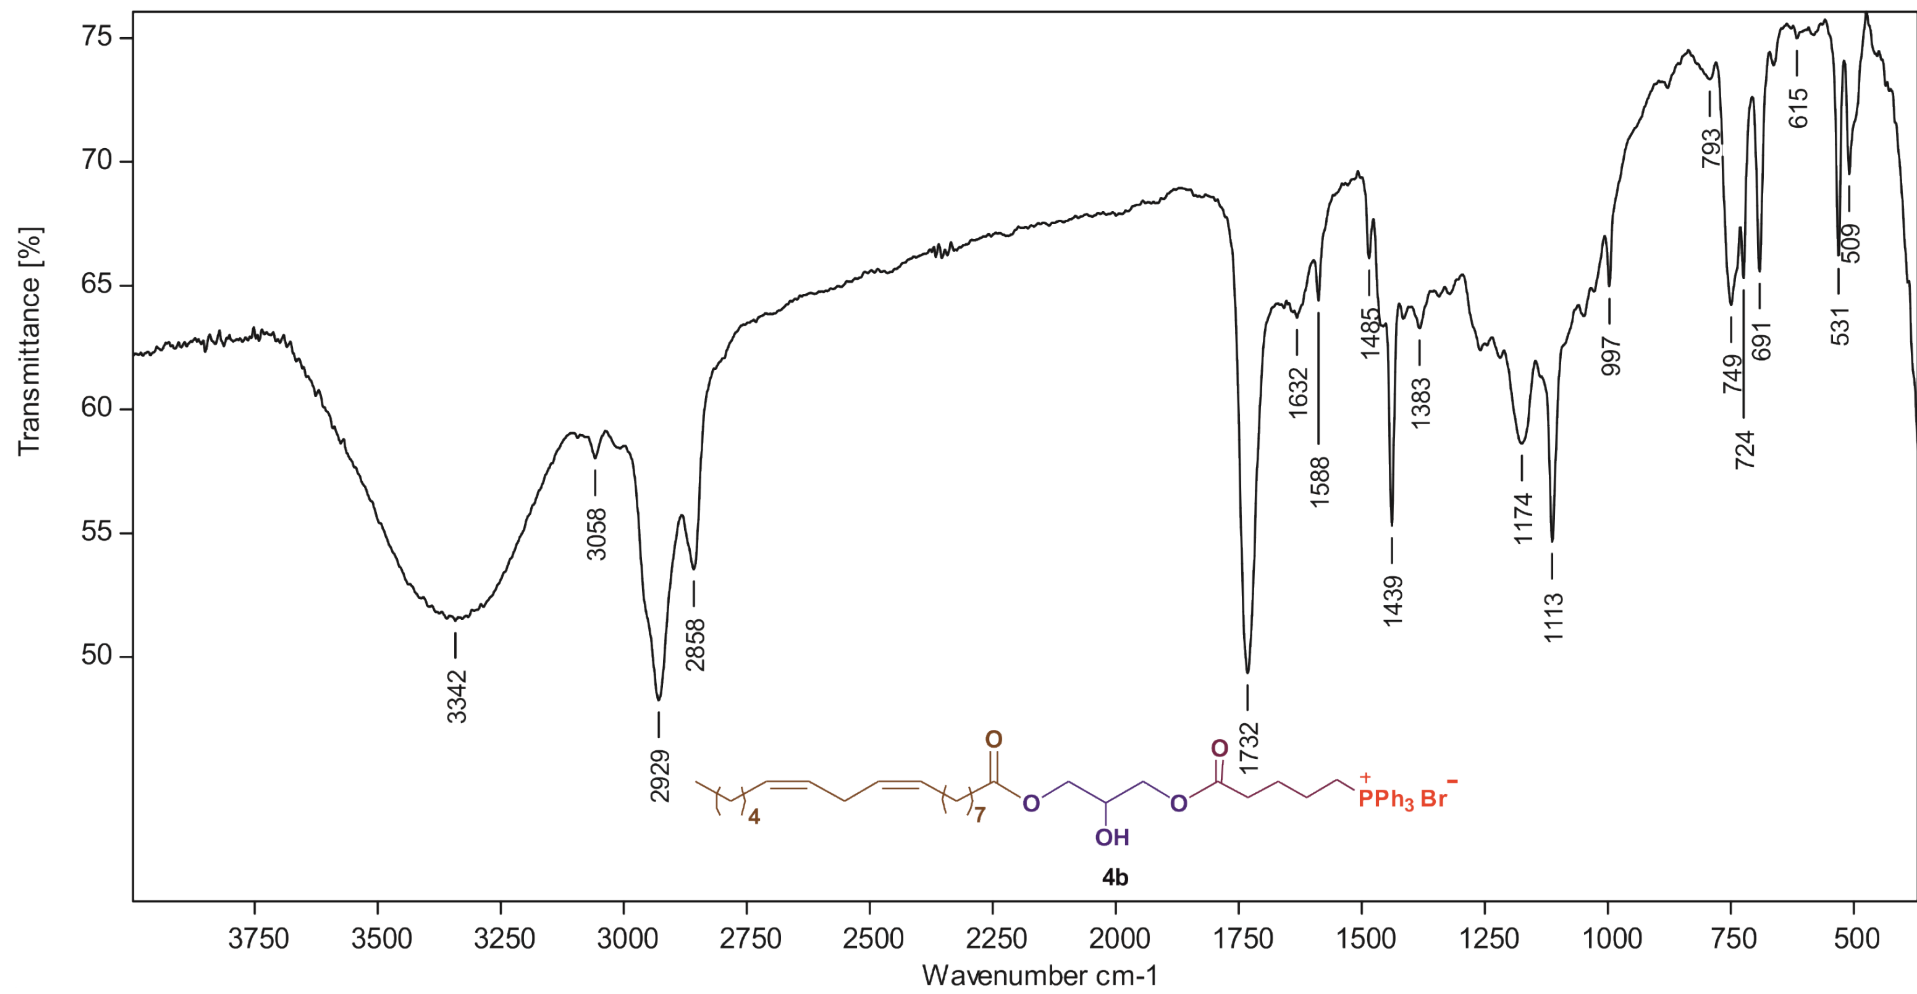

Figure S26. IR (KBr) spectrum of **4b**.

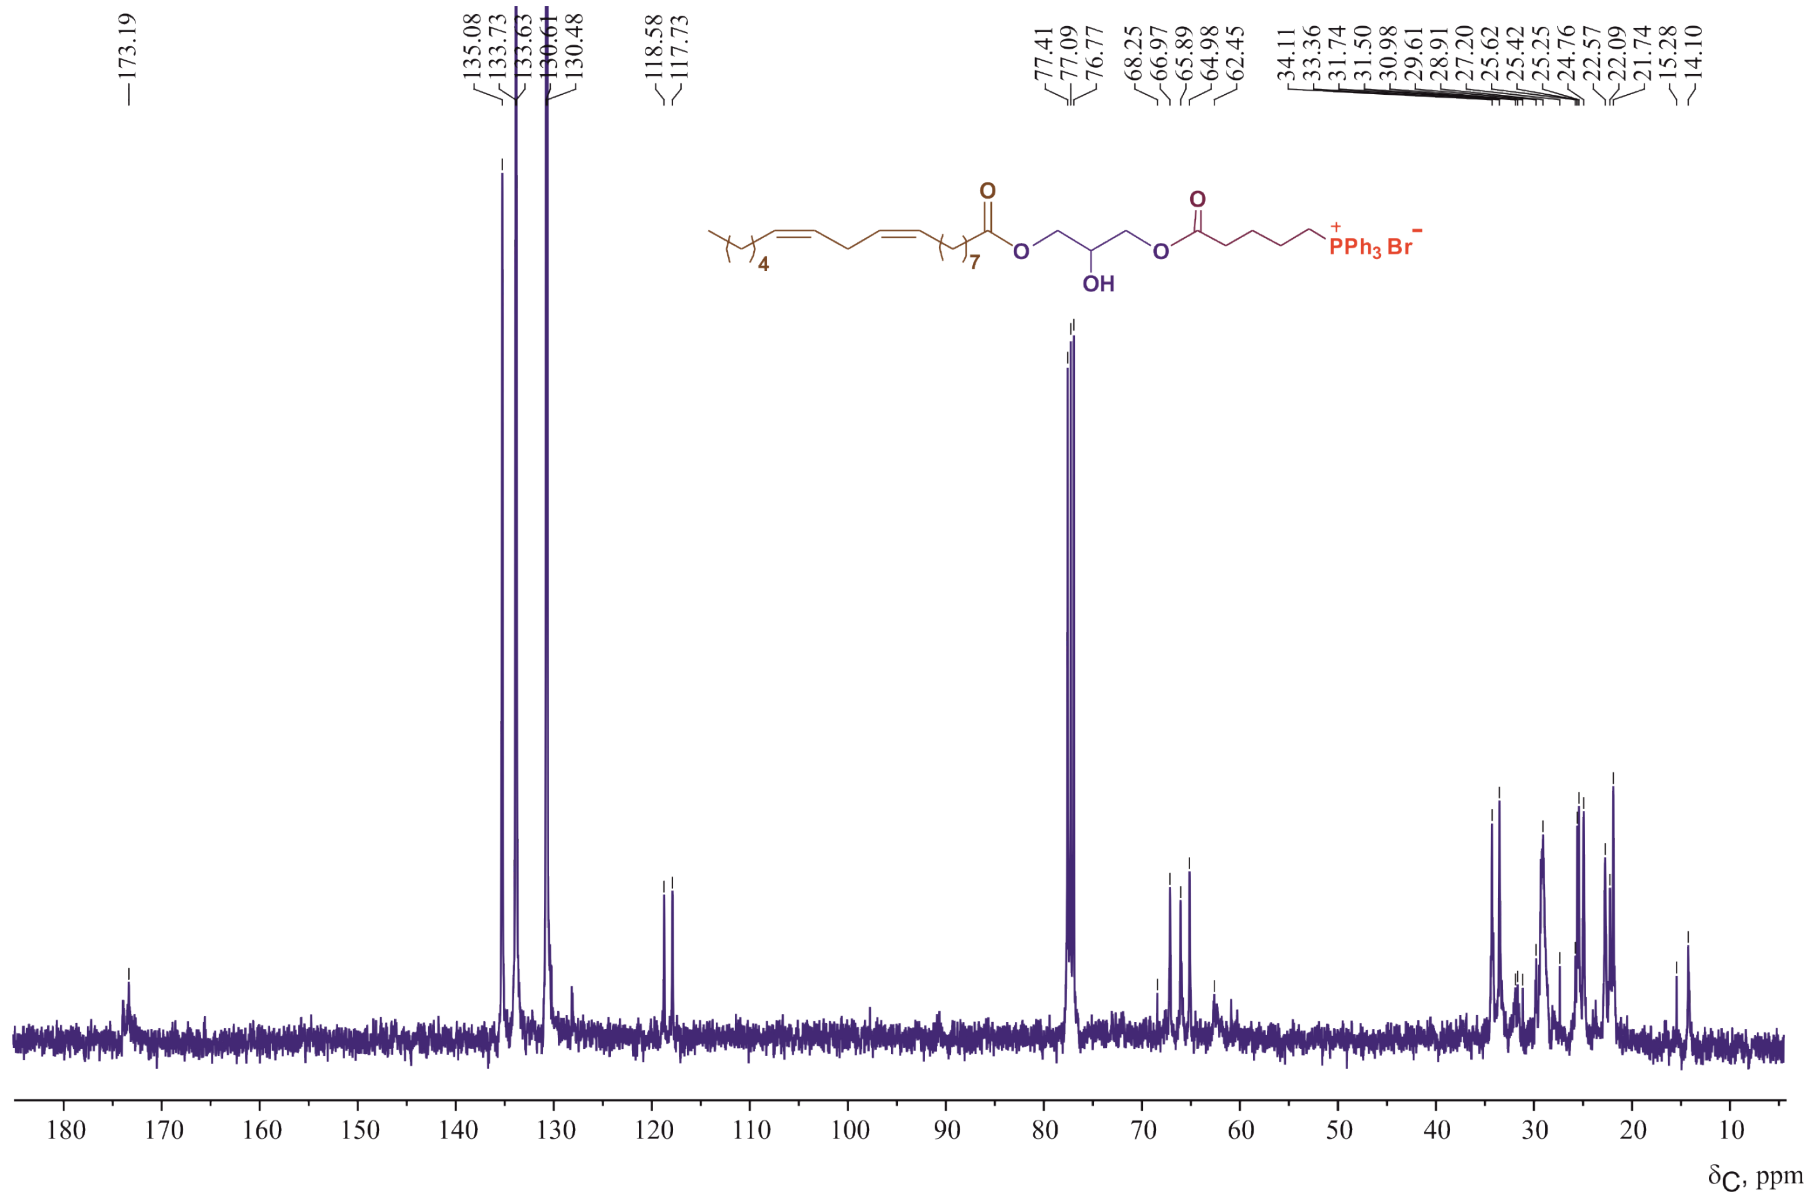

Figure S27.  $^{13}\text{C}$ - $\{^1\text{H}\}$  NMR ( $\text{CDCl}_3$ , 100.6 MHz) spectrum of **4b**.

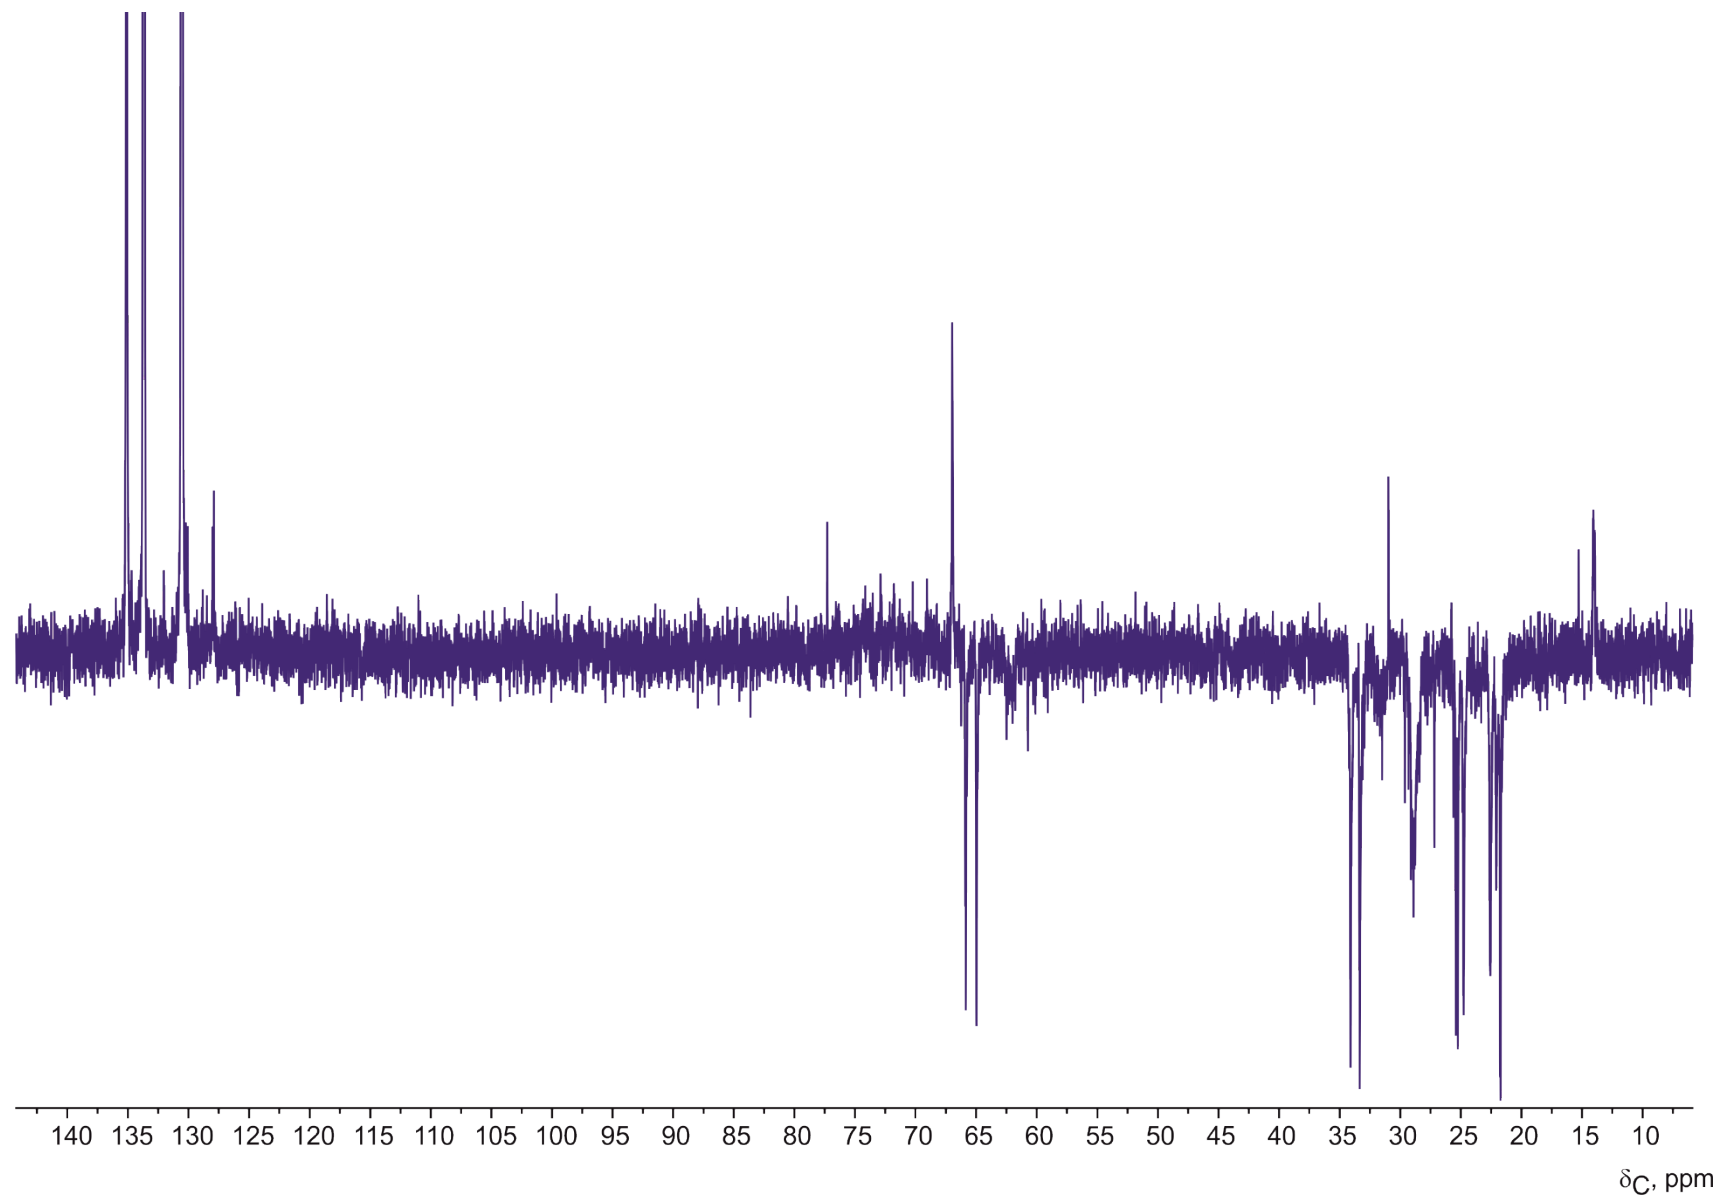

Figure S28.  $^{13}\text{C}$ - $\{^1\text{H}\}$  apt NMR ( $\text{CDCl}_3$ , 100.6 MHz) spectrum of **4b**.



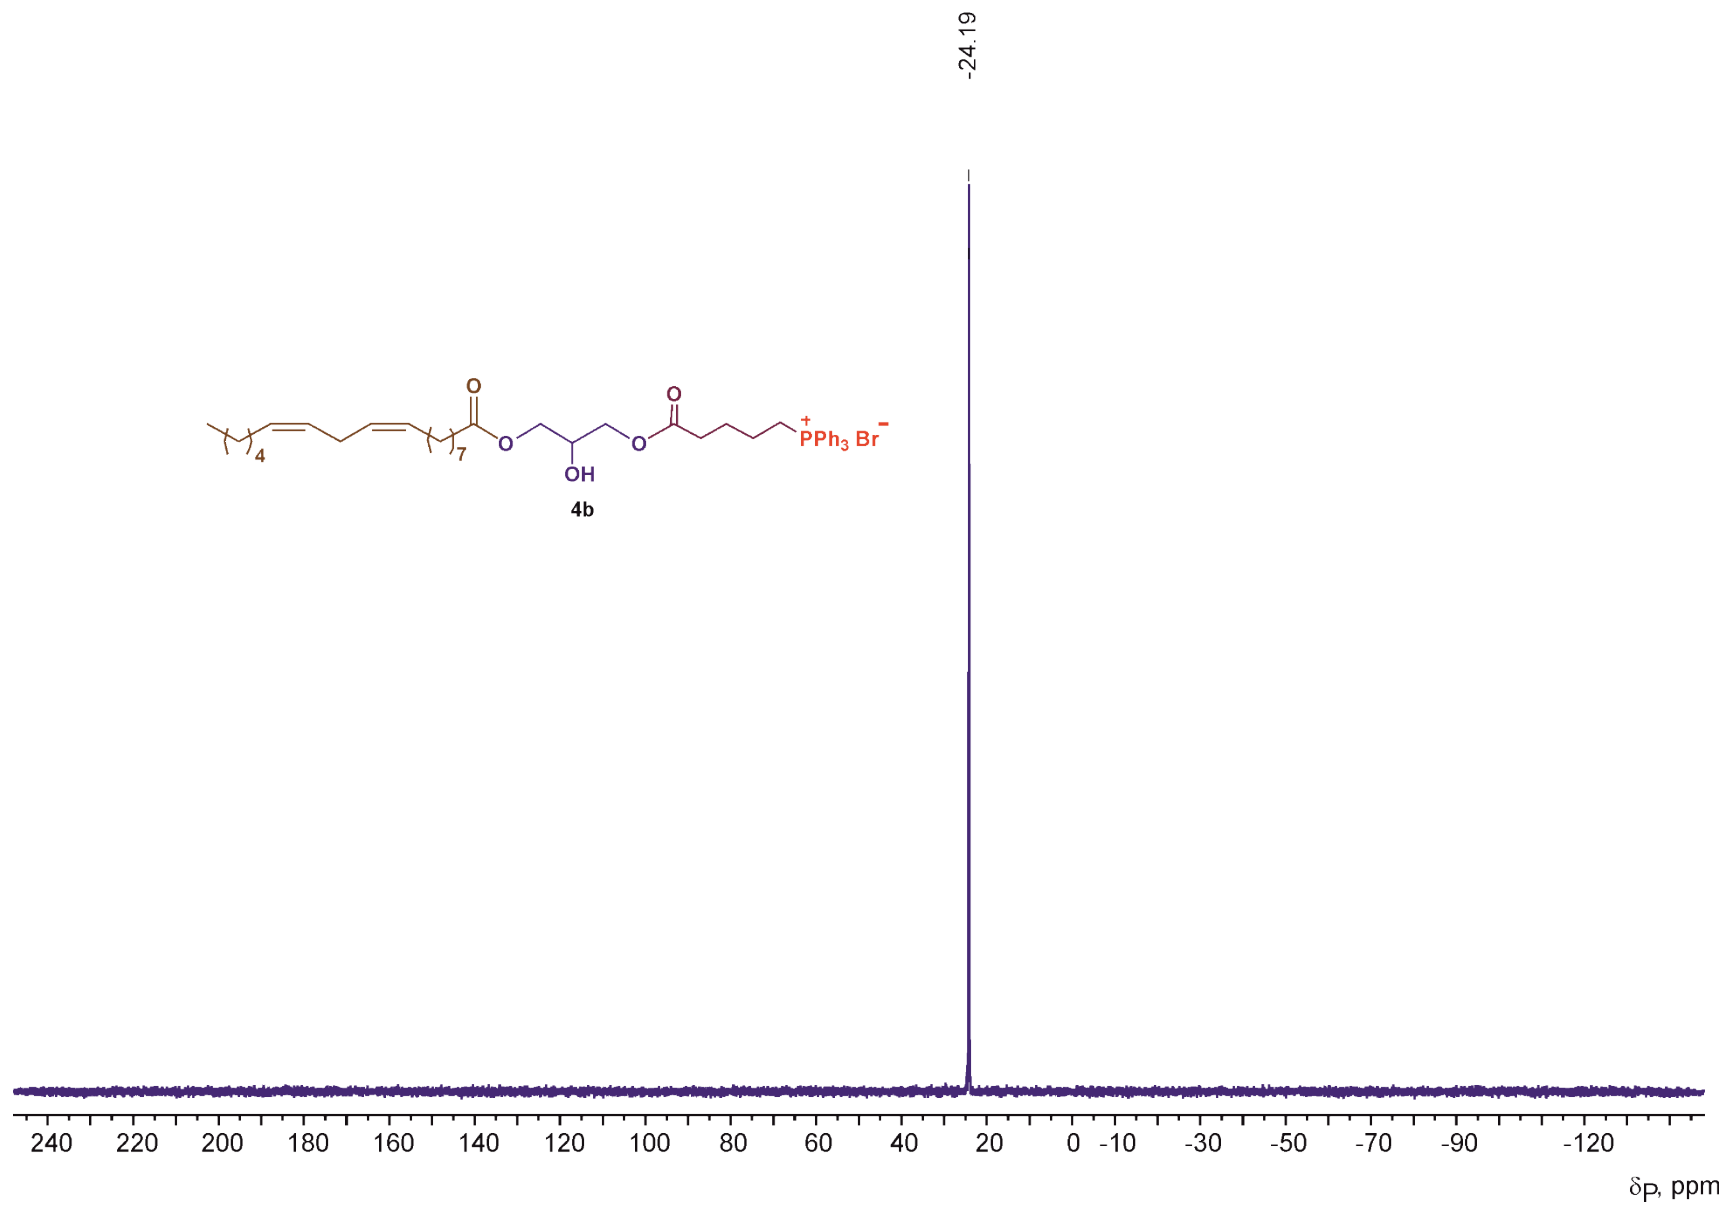

Figure S29.  $^{31}\text{P}\{-^1\text{H}\}$  NMR ( $\text{CDCl}_3$ , 162 MHz) spectrum of **4b**.

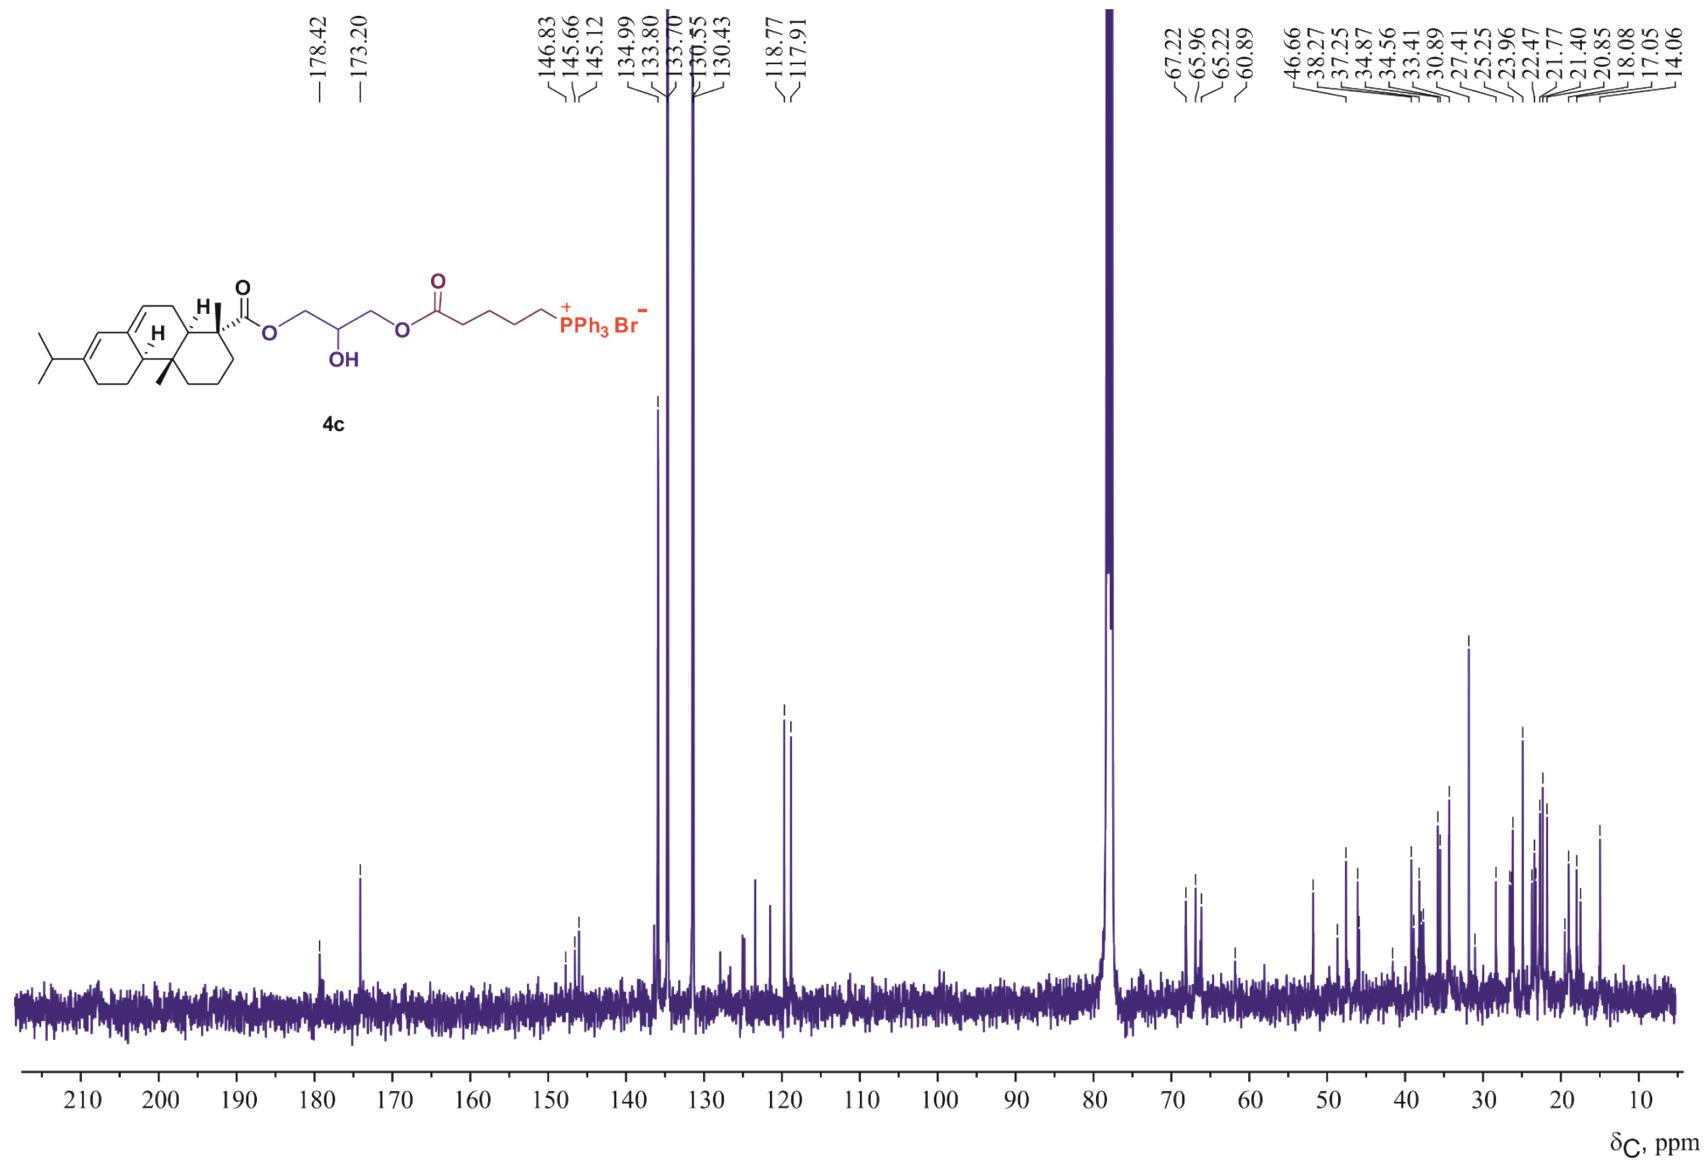

Figure S30.  $^{13}\text{C}$ - $\{^1\text{H}\}$  NMR (CDCl<sub>3</sub>, 100.6 MHz) spectrum of **4c**.

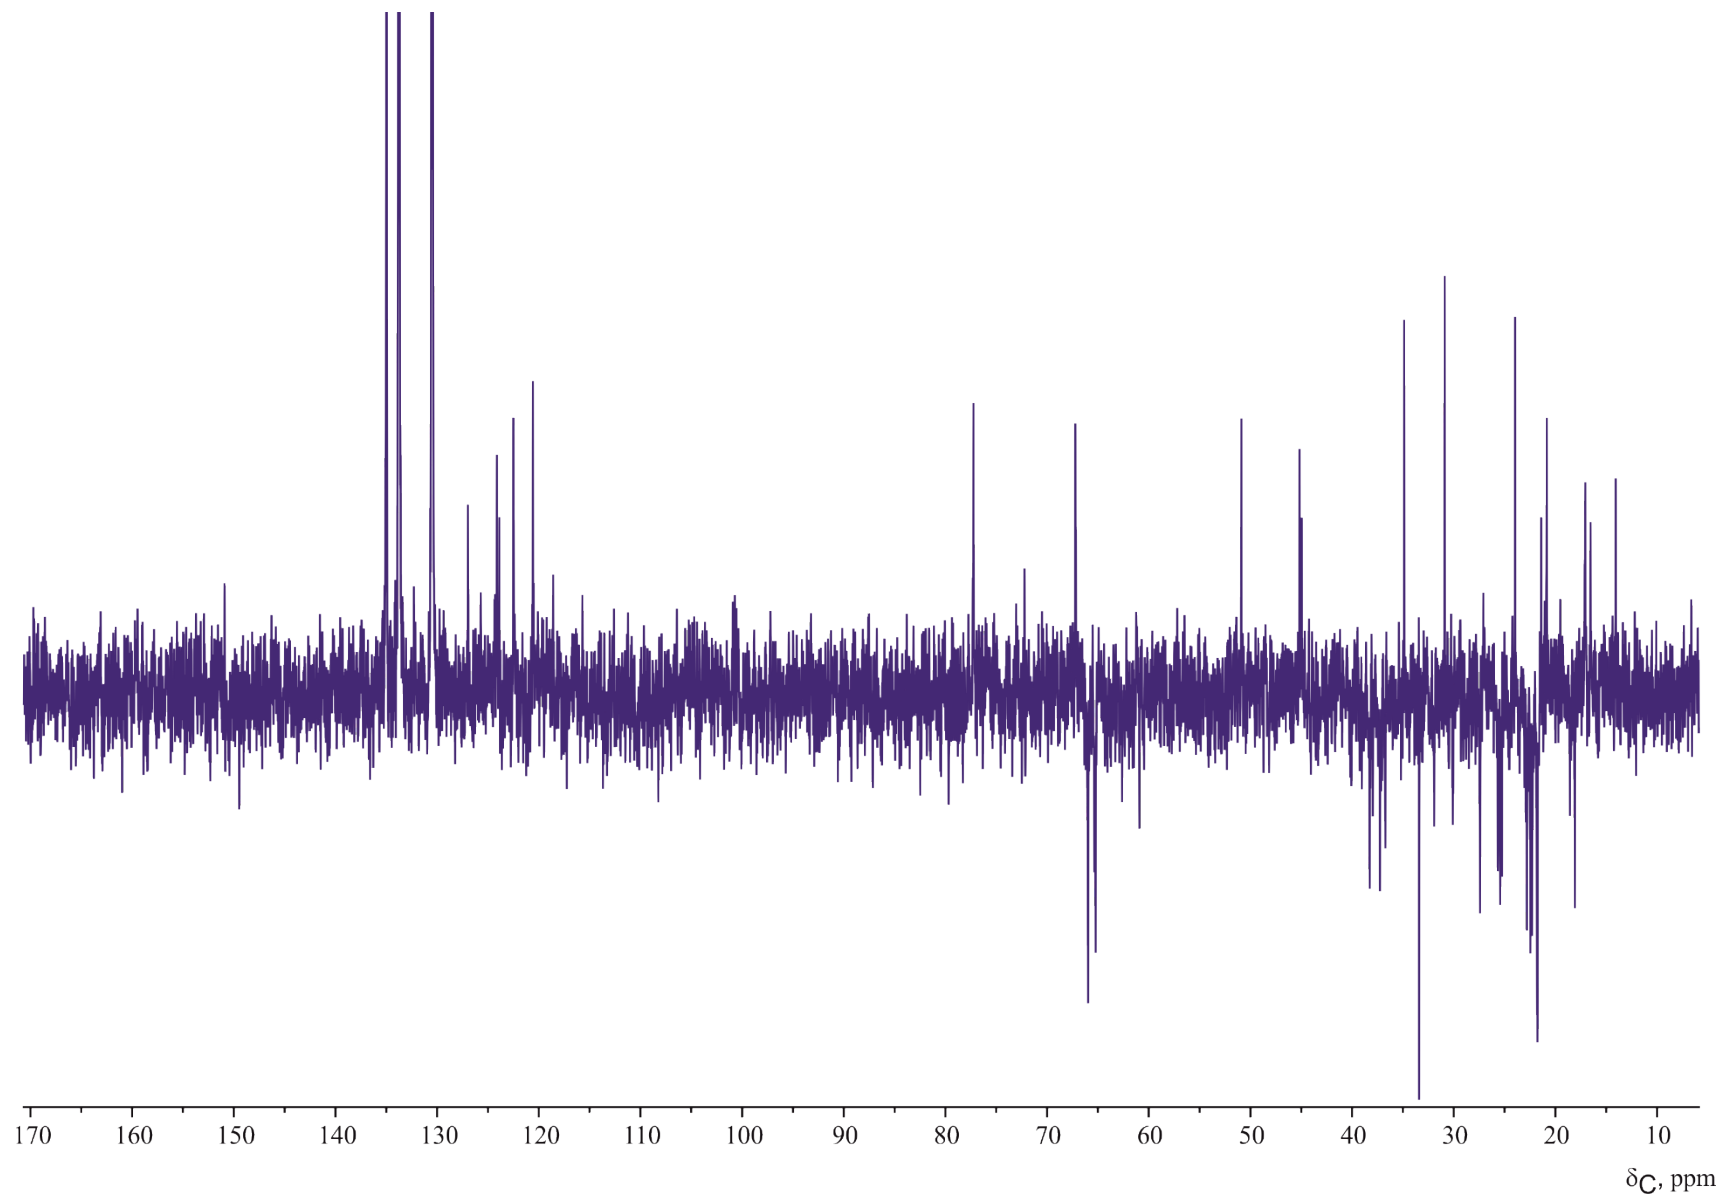

Figure S31.  $^{13}\text{C}$ - $\{^1\text{H}\}$  apt NMR ( $\text{CDCl}_3$ , 100.6 MHz) spectrum of **4c**.

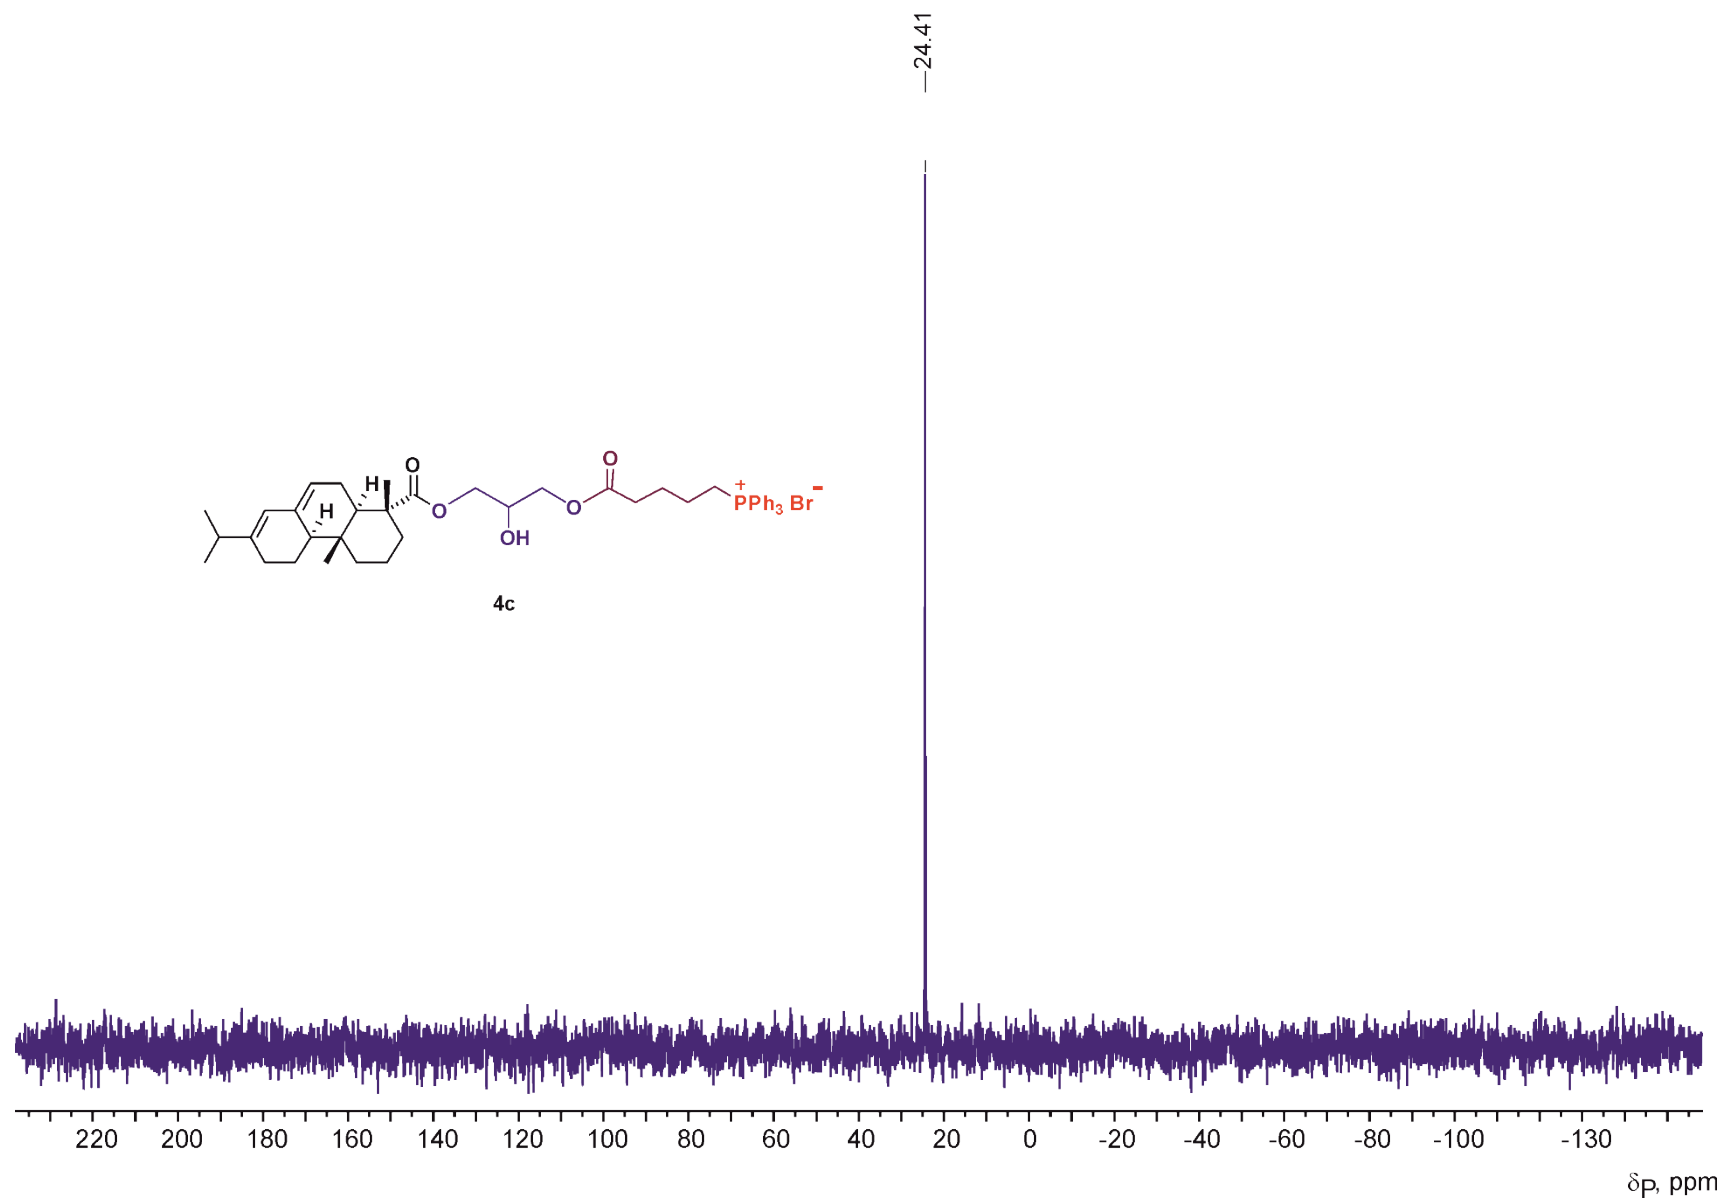

Figure S32.  $^{31}\text{P}$ - $\{^1\text{H}\}$  NMR ( $\text{CDCl}_3$ , 162 MHz) spectrum of **4c**.

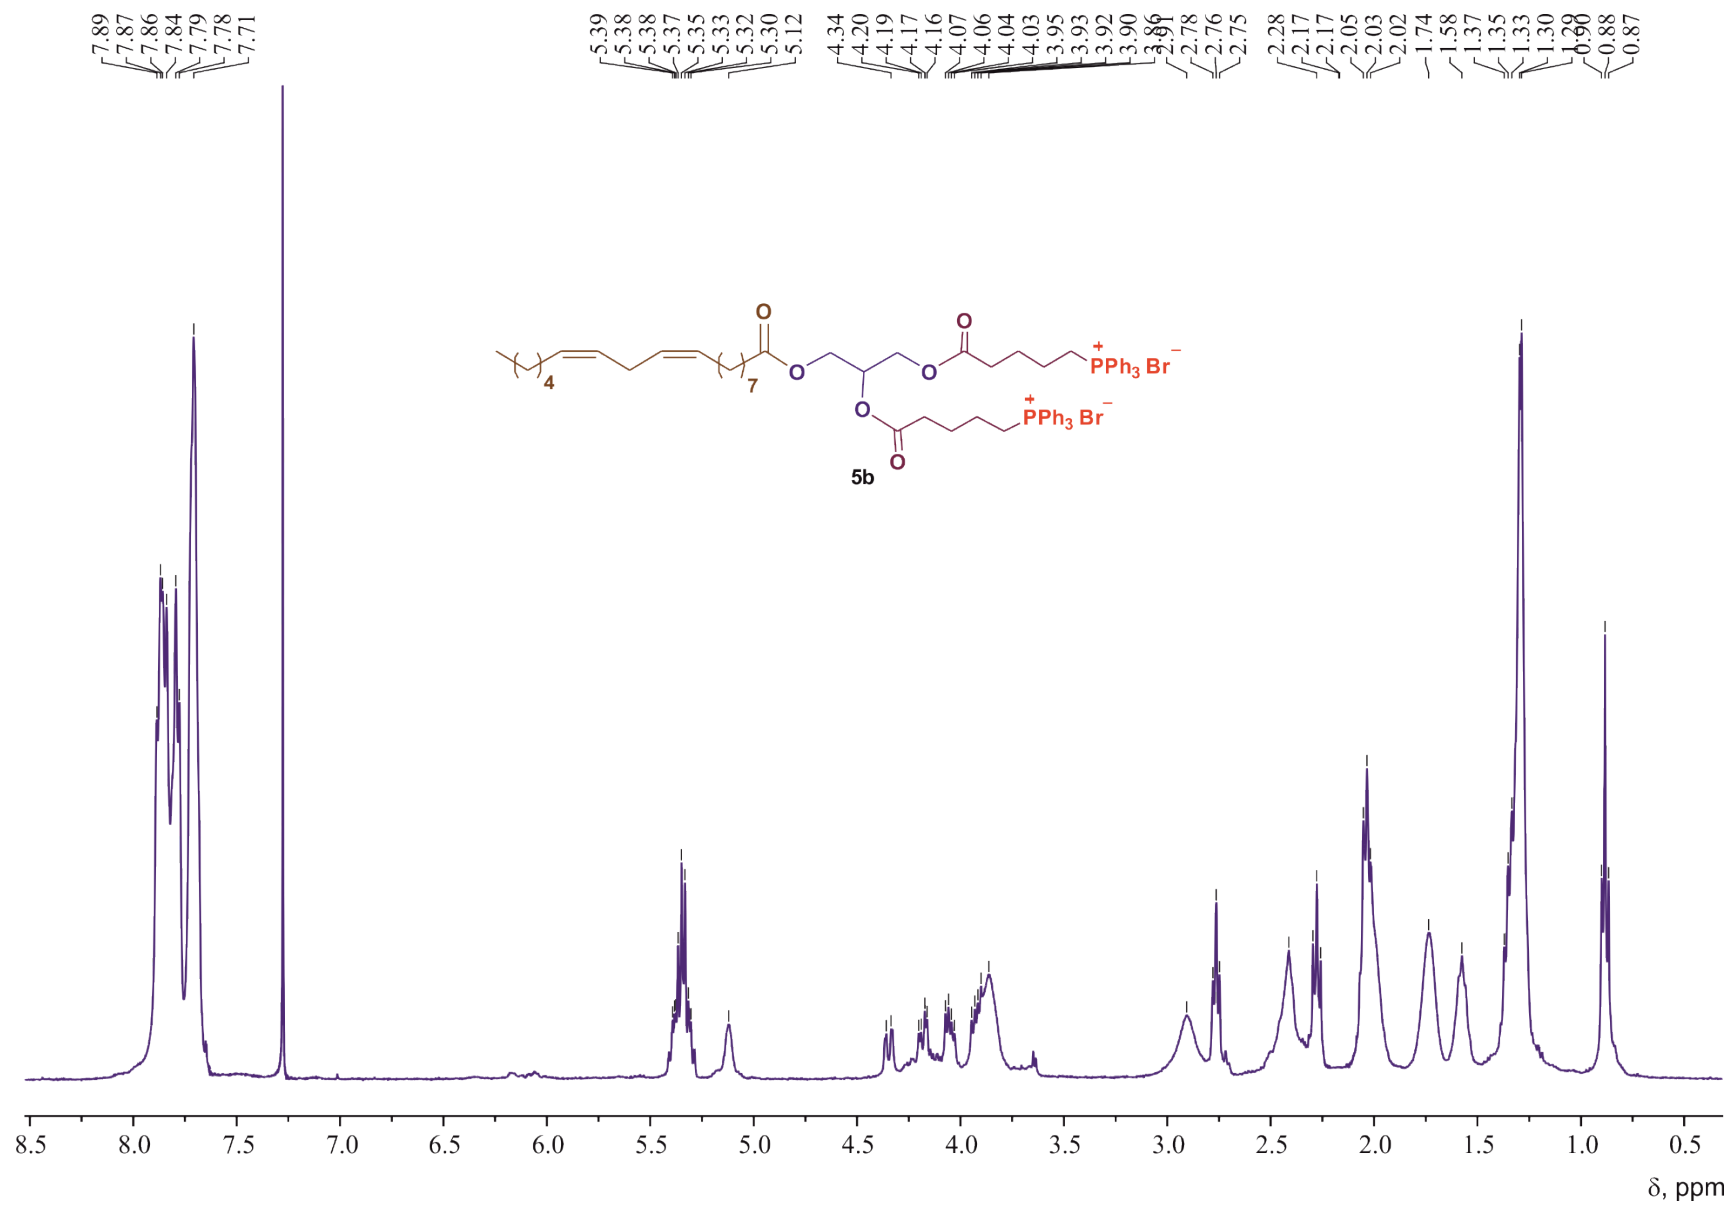

Figure S33. <sup>1</sup>H NMR spectrum (400 MHz, CDCl<sub>3</sub>) of compound **5b**.

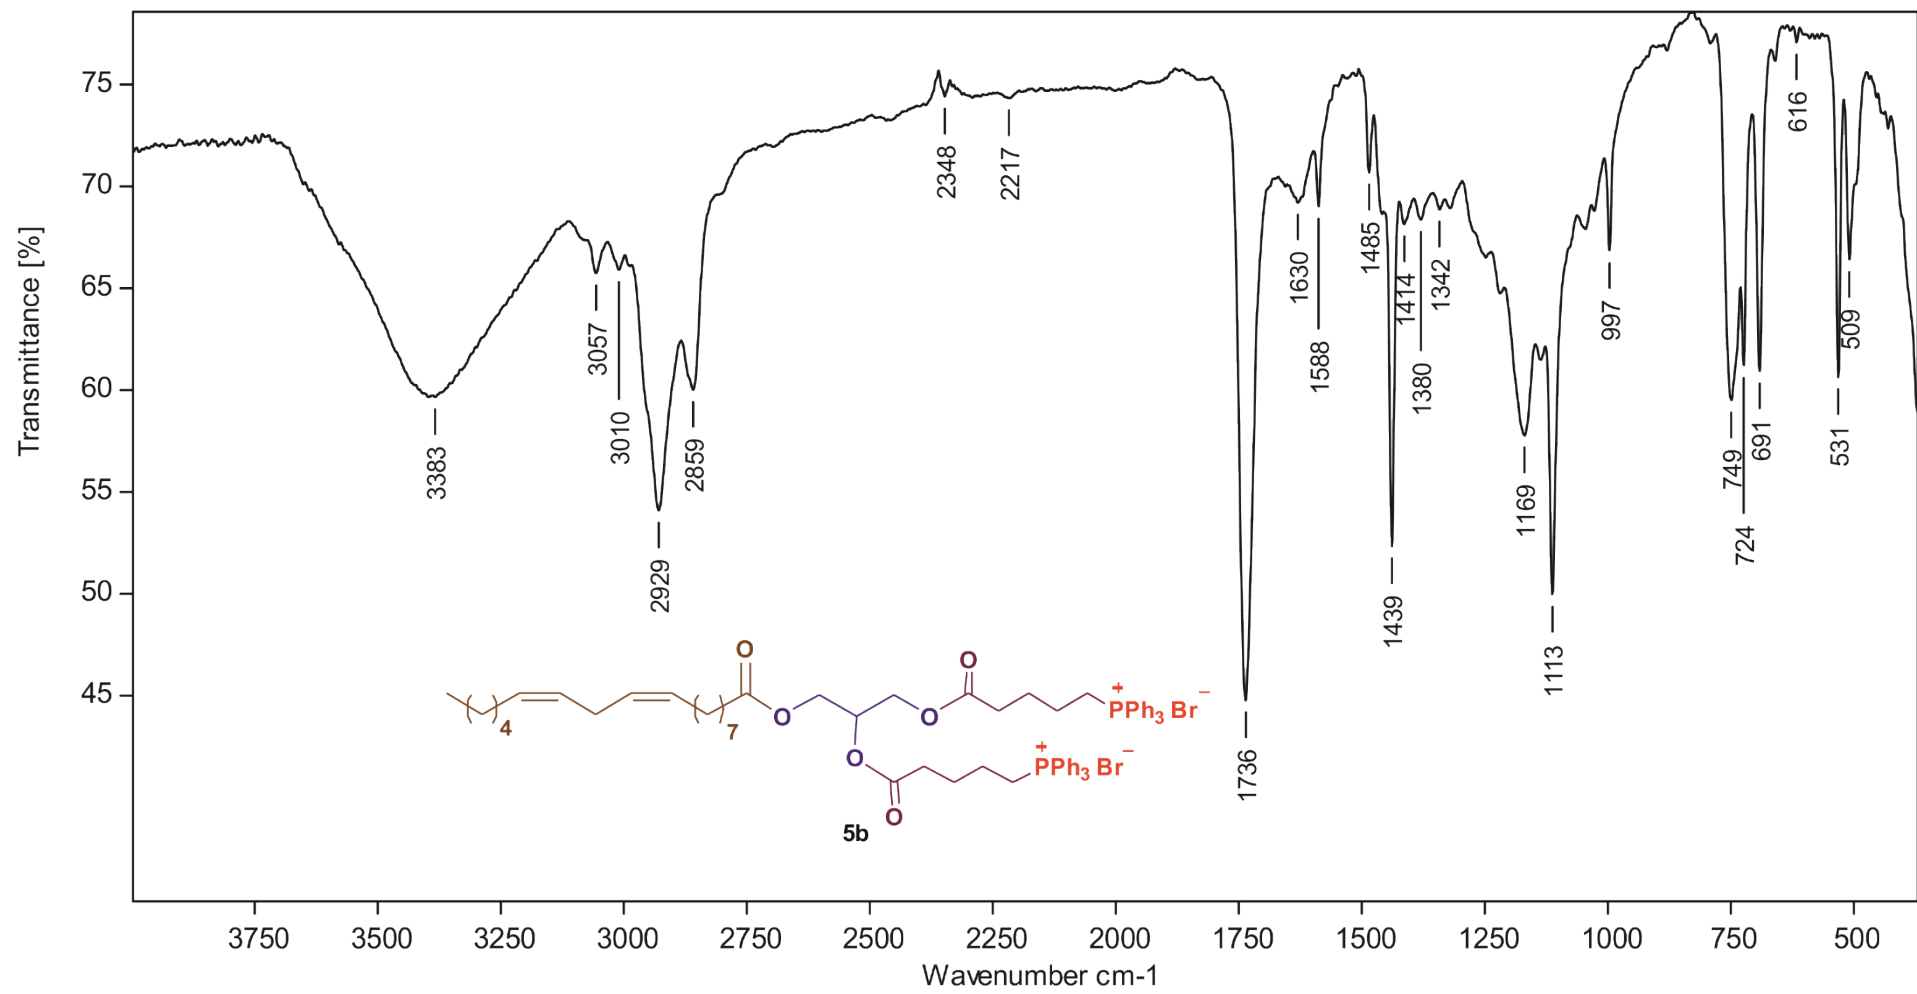

Figure S34. IR (KBr) spectrum of **5b**.

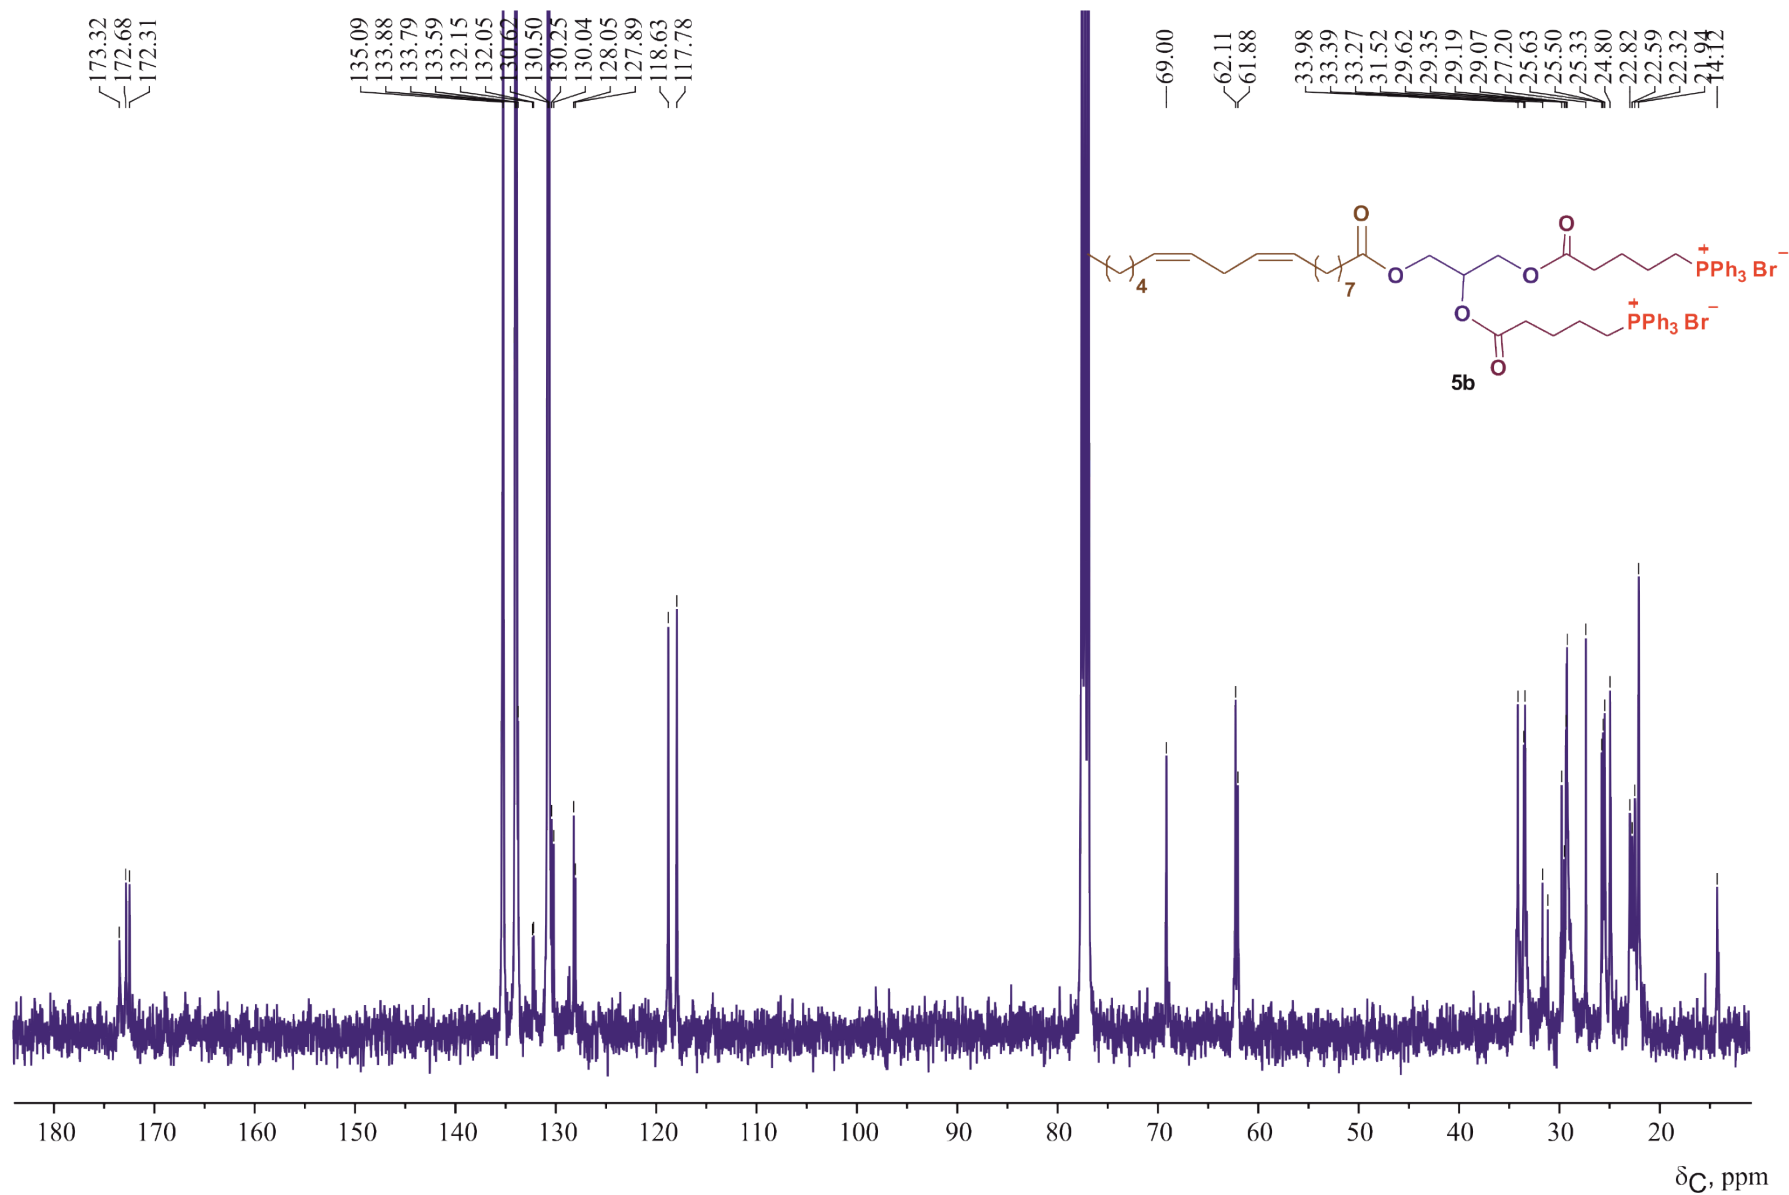

Figure S35.  $^{13}\text{C}$ - $\{^1\text{H}\}$  NMR ( $\text{CDCl}_3$ , 100.6 MHz) spectrum of **5b**.

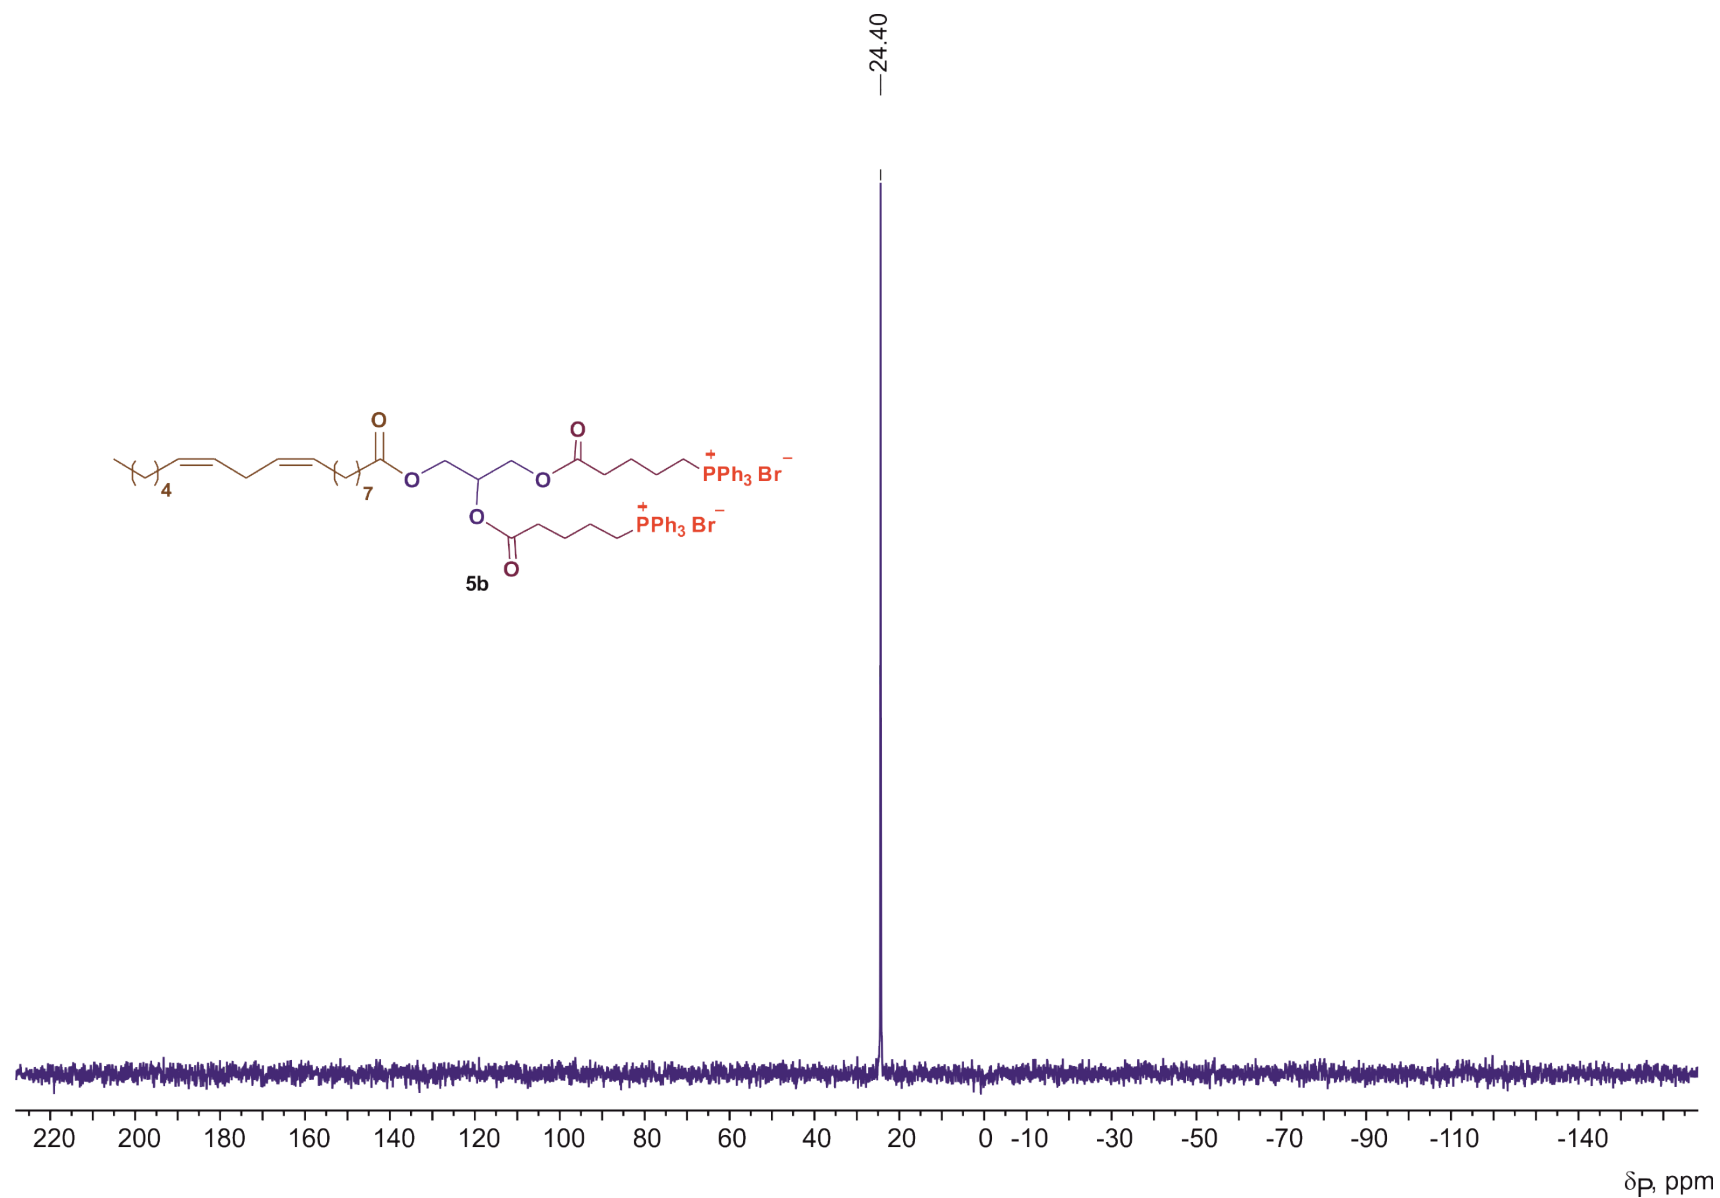

Figure S36.  $^{31}\text{P}$ - $\{^1\text{H}\}$  NMR ( $\text{CDCl}_3$ , 162 MHz) spectrum of **5b**.



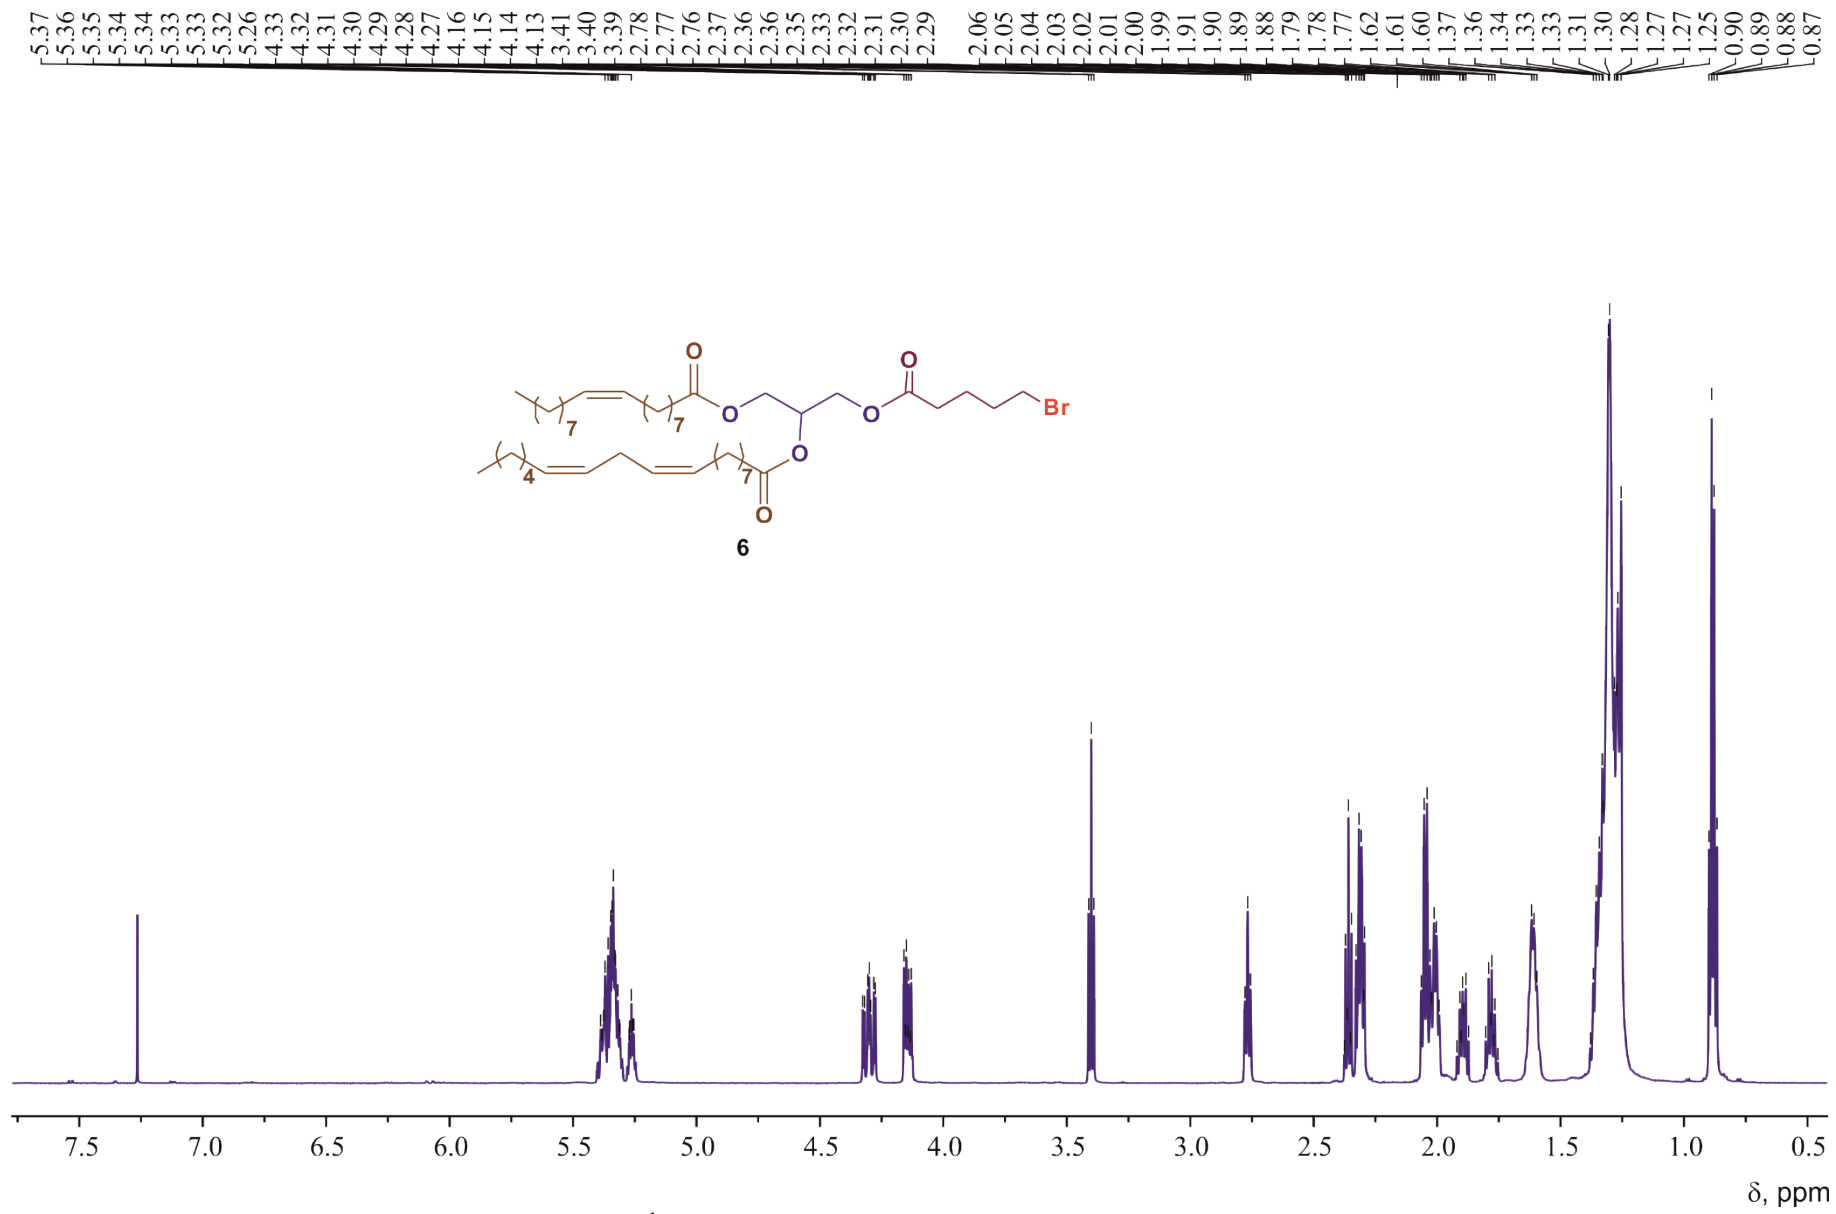

Figure S37.  $^1\text{H}$  NMR spectrum (400 MHz,  $\text{CDCl}_3$ ) of compound **6**.

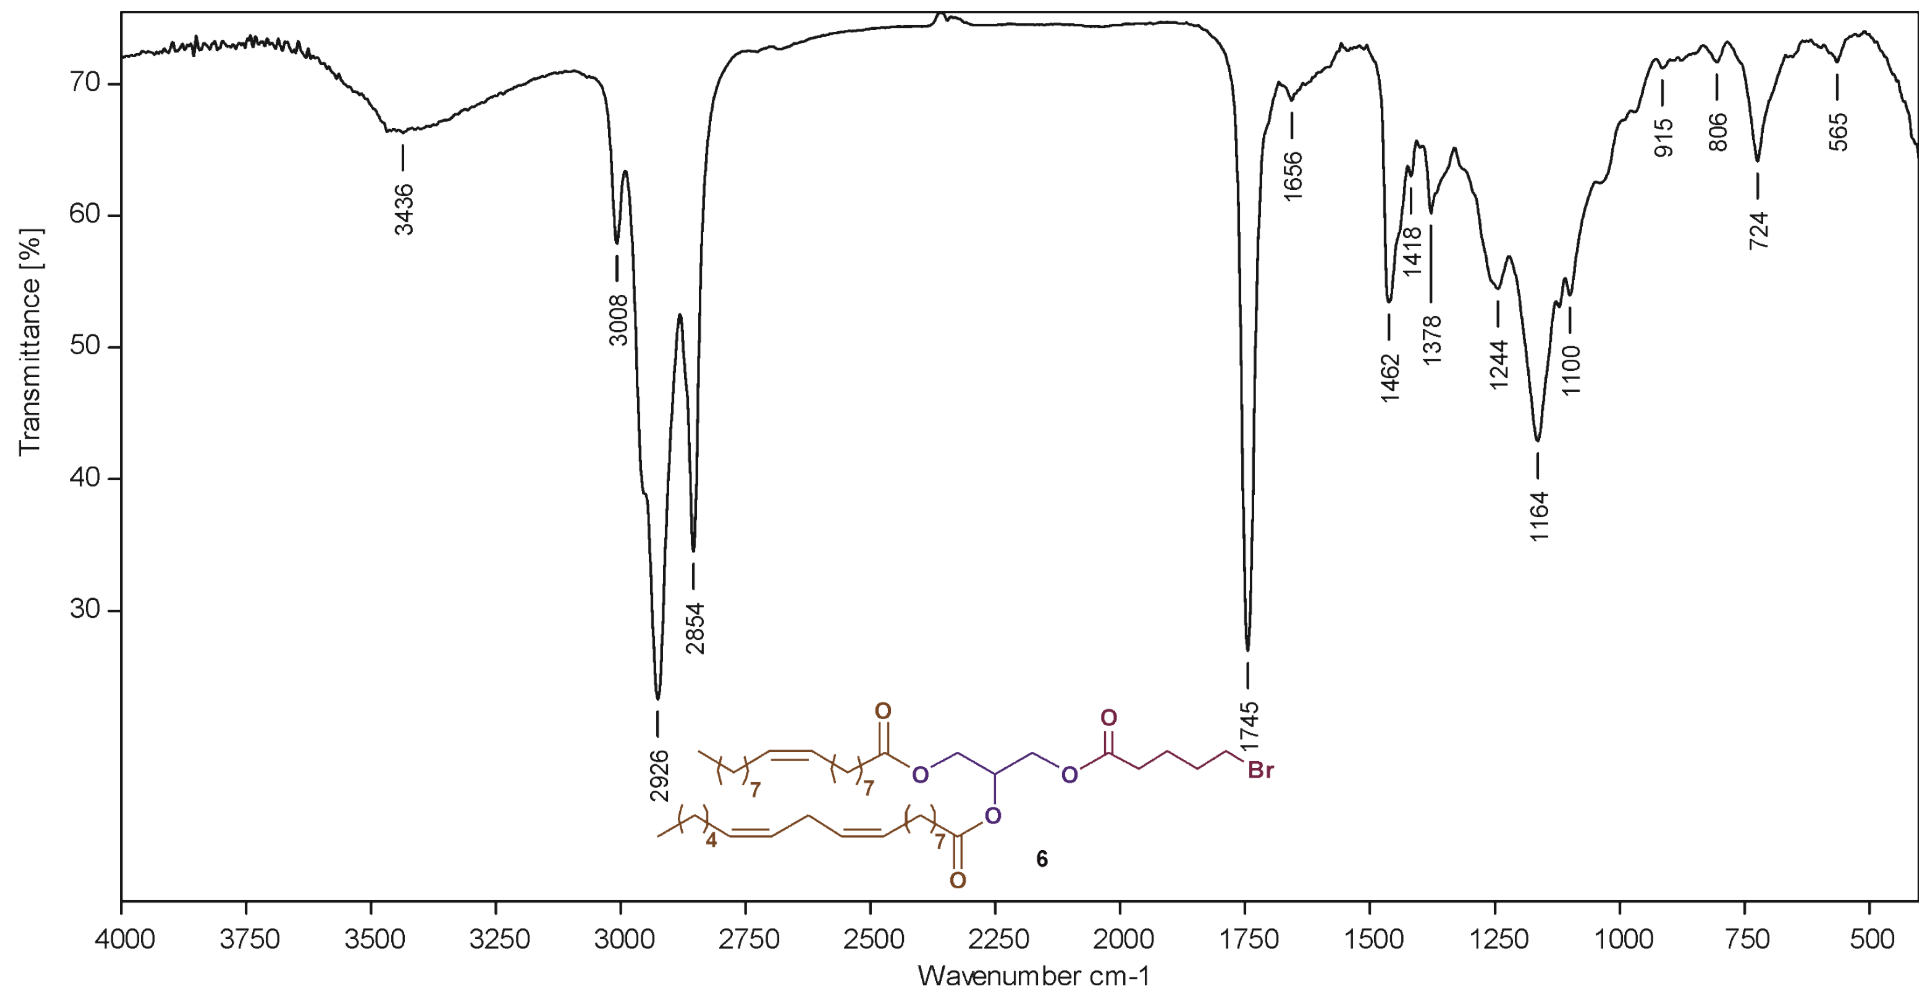

Figure S38. IR (KBr) spectrum of **6**.

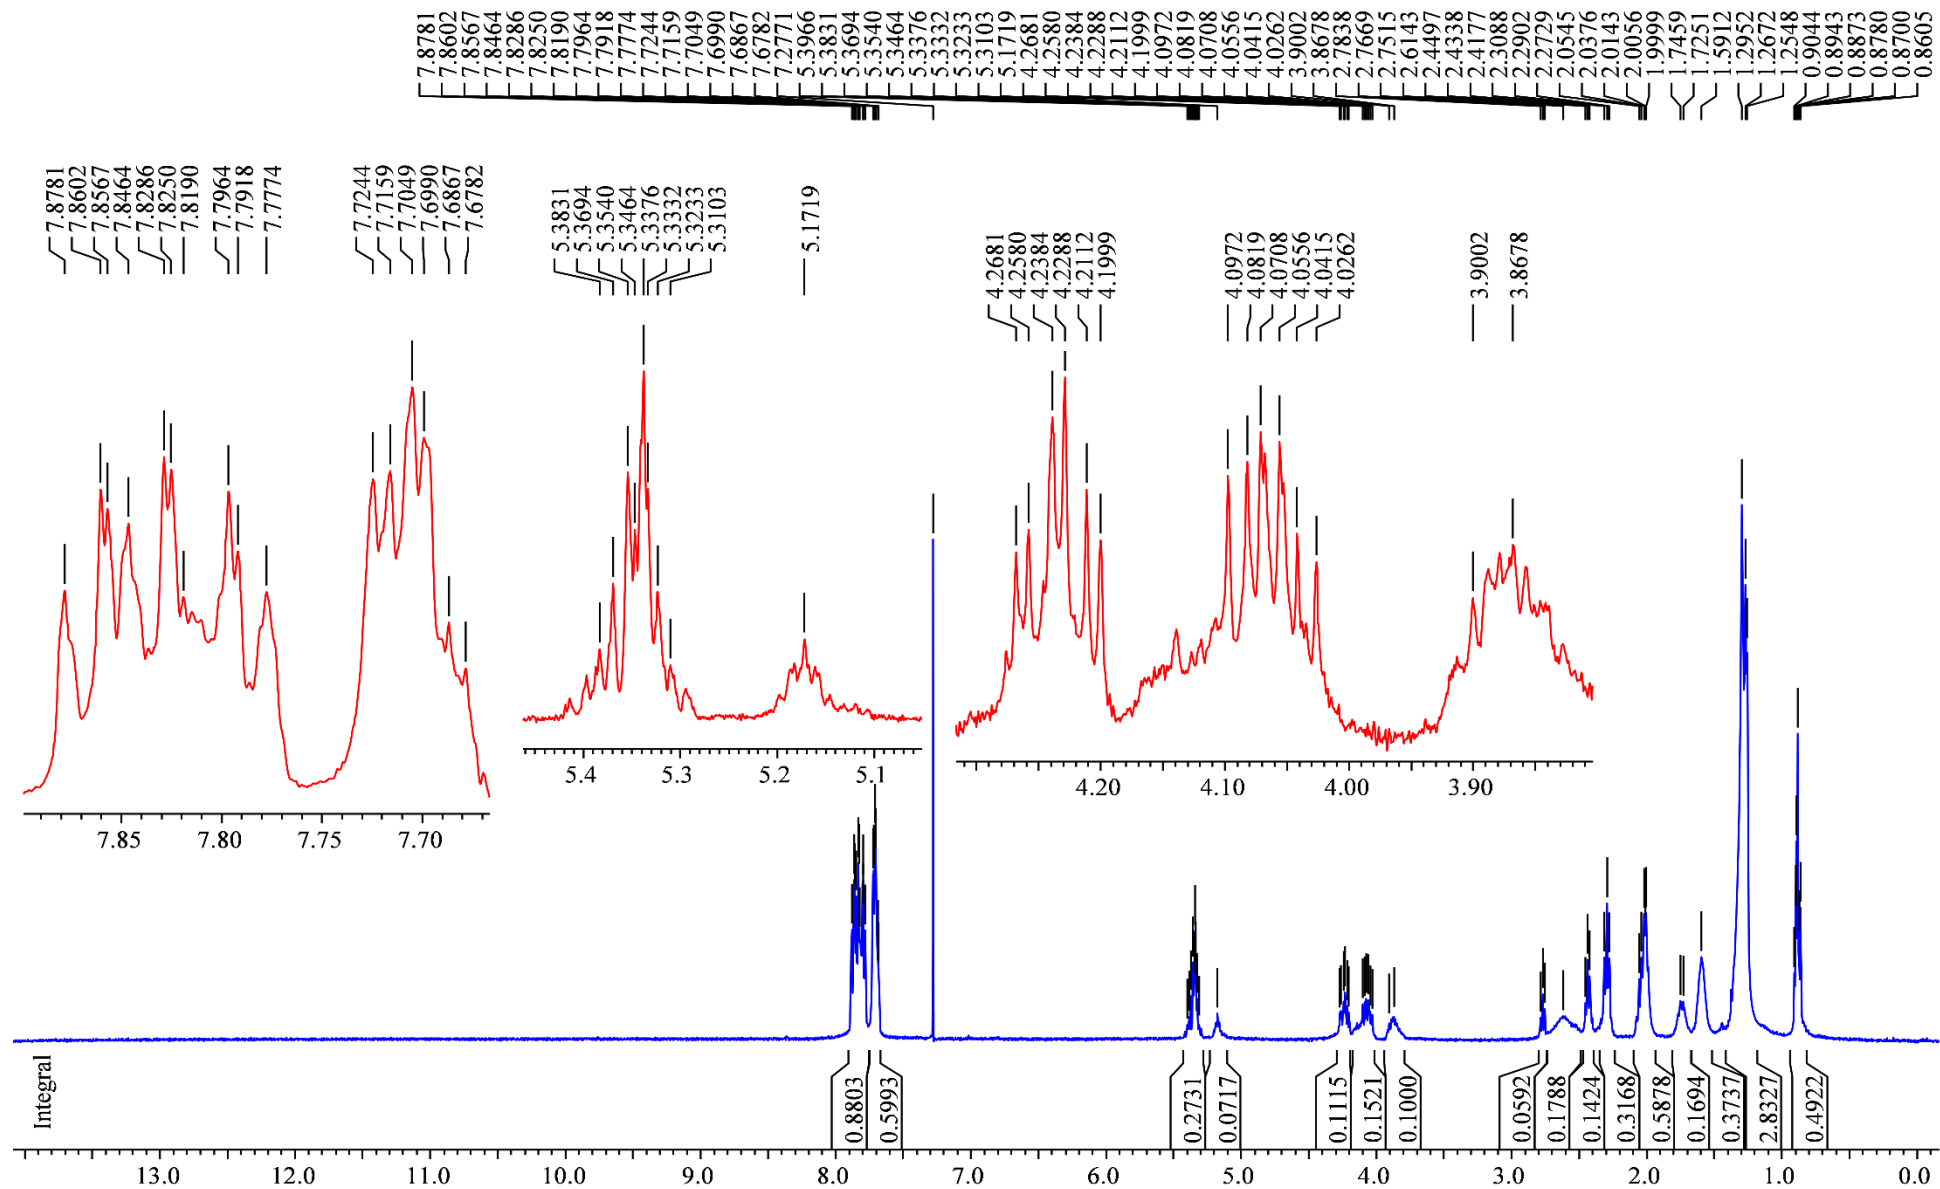

Figure S39.  $^1\text{H}$  NMR spectrum (400 MHz,  $\text{CDCl}_3$ ) of compound 7.

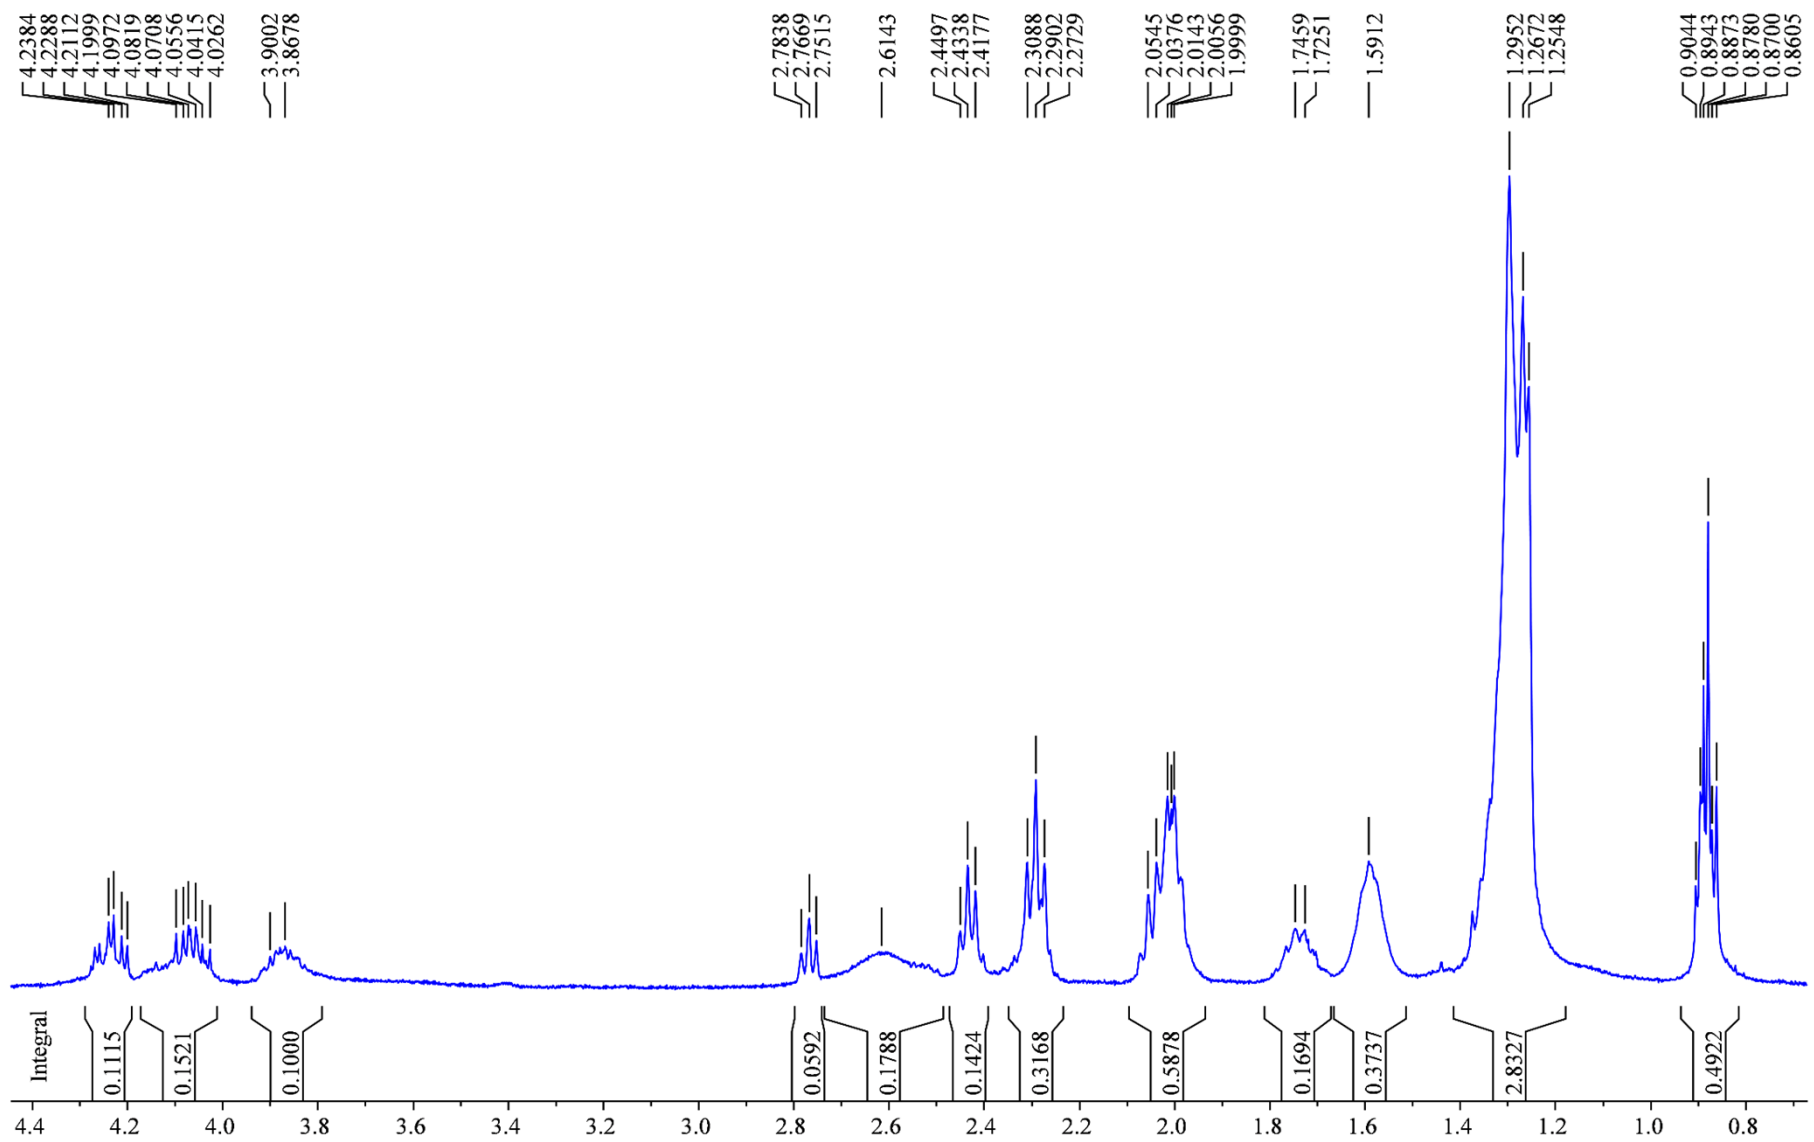

Figure S40. High-field region of <sup>1</sup>H NMR spectrum (400 MHz, CDCl<sub>3</sub>) of compound 7.

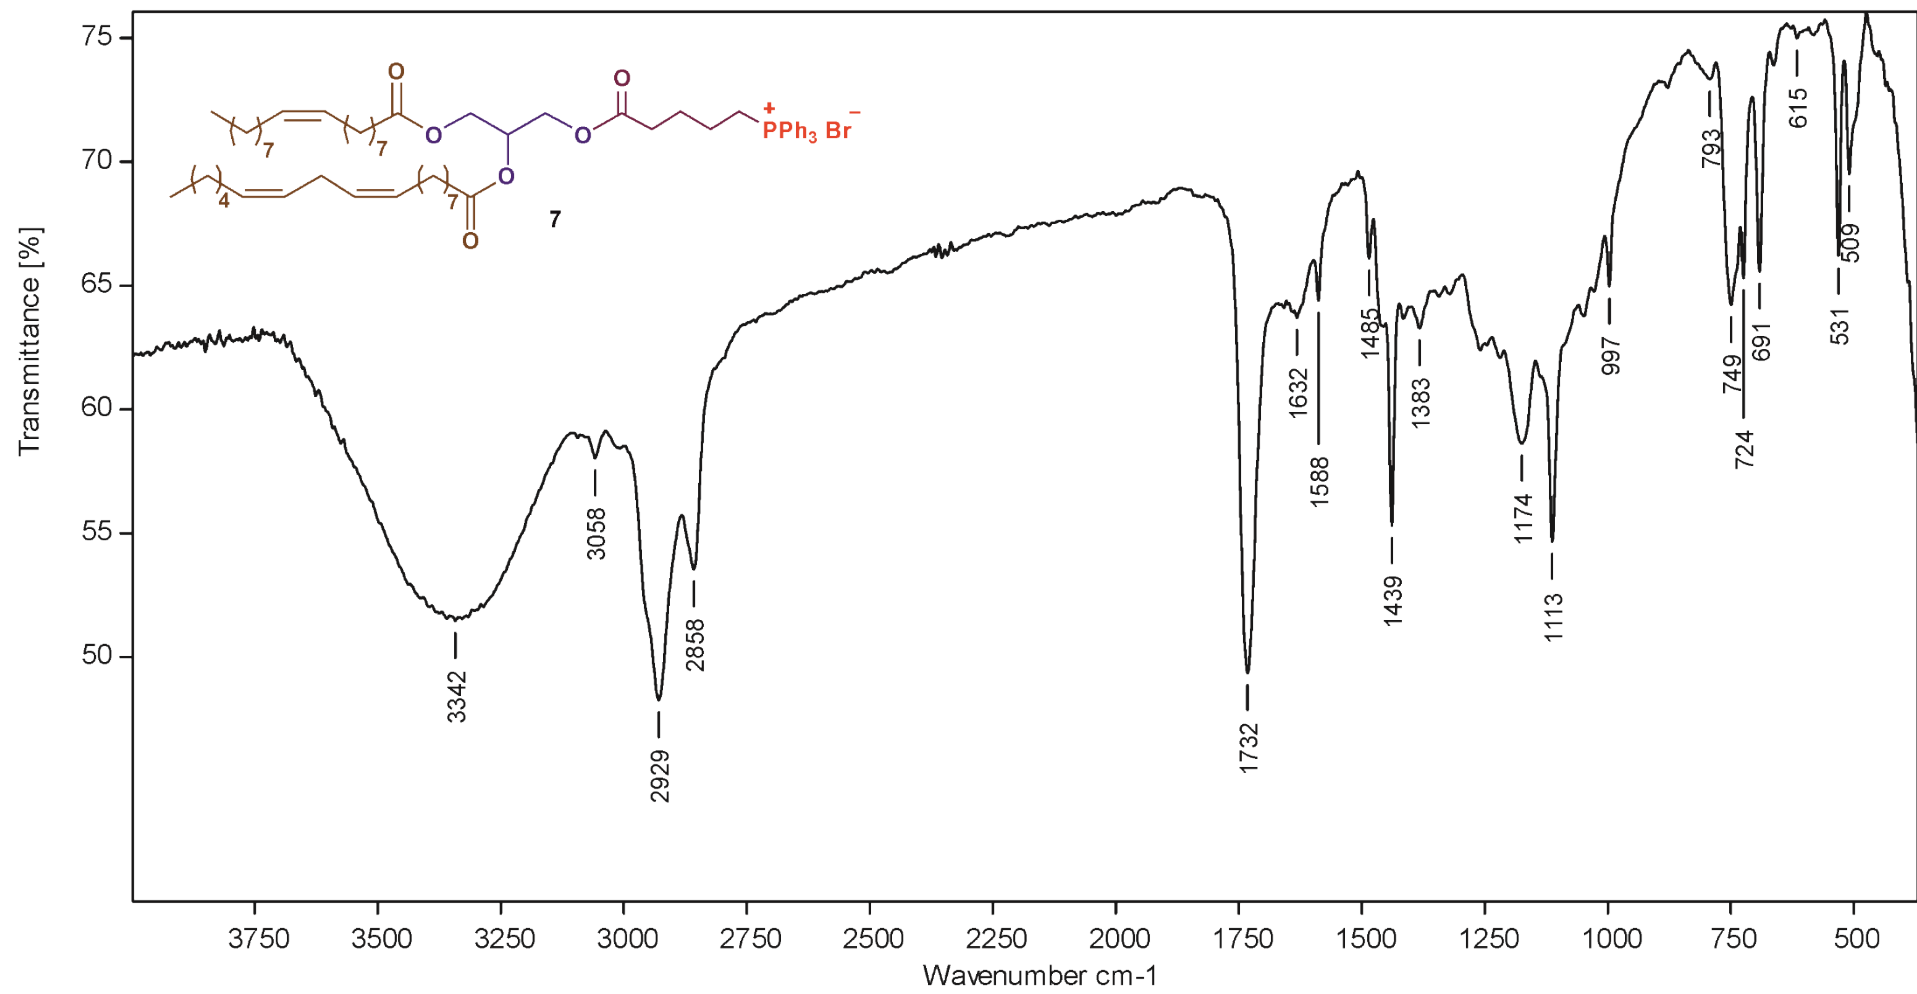

Figure S41. IR (KBr) spectrum of 7.

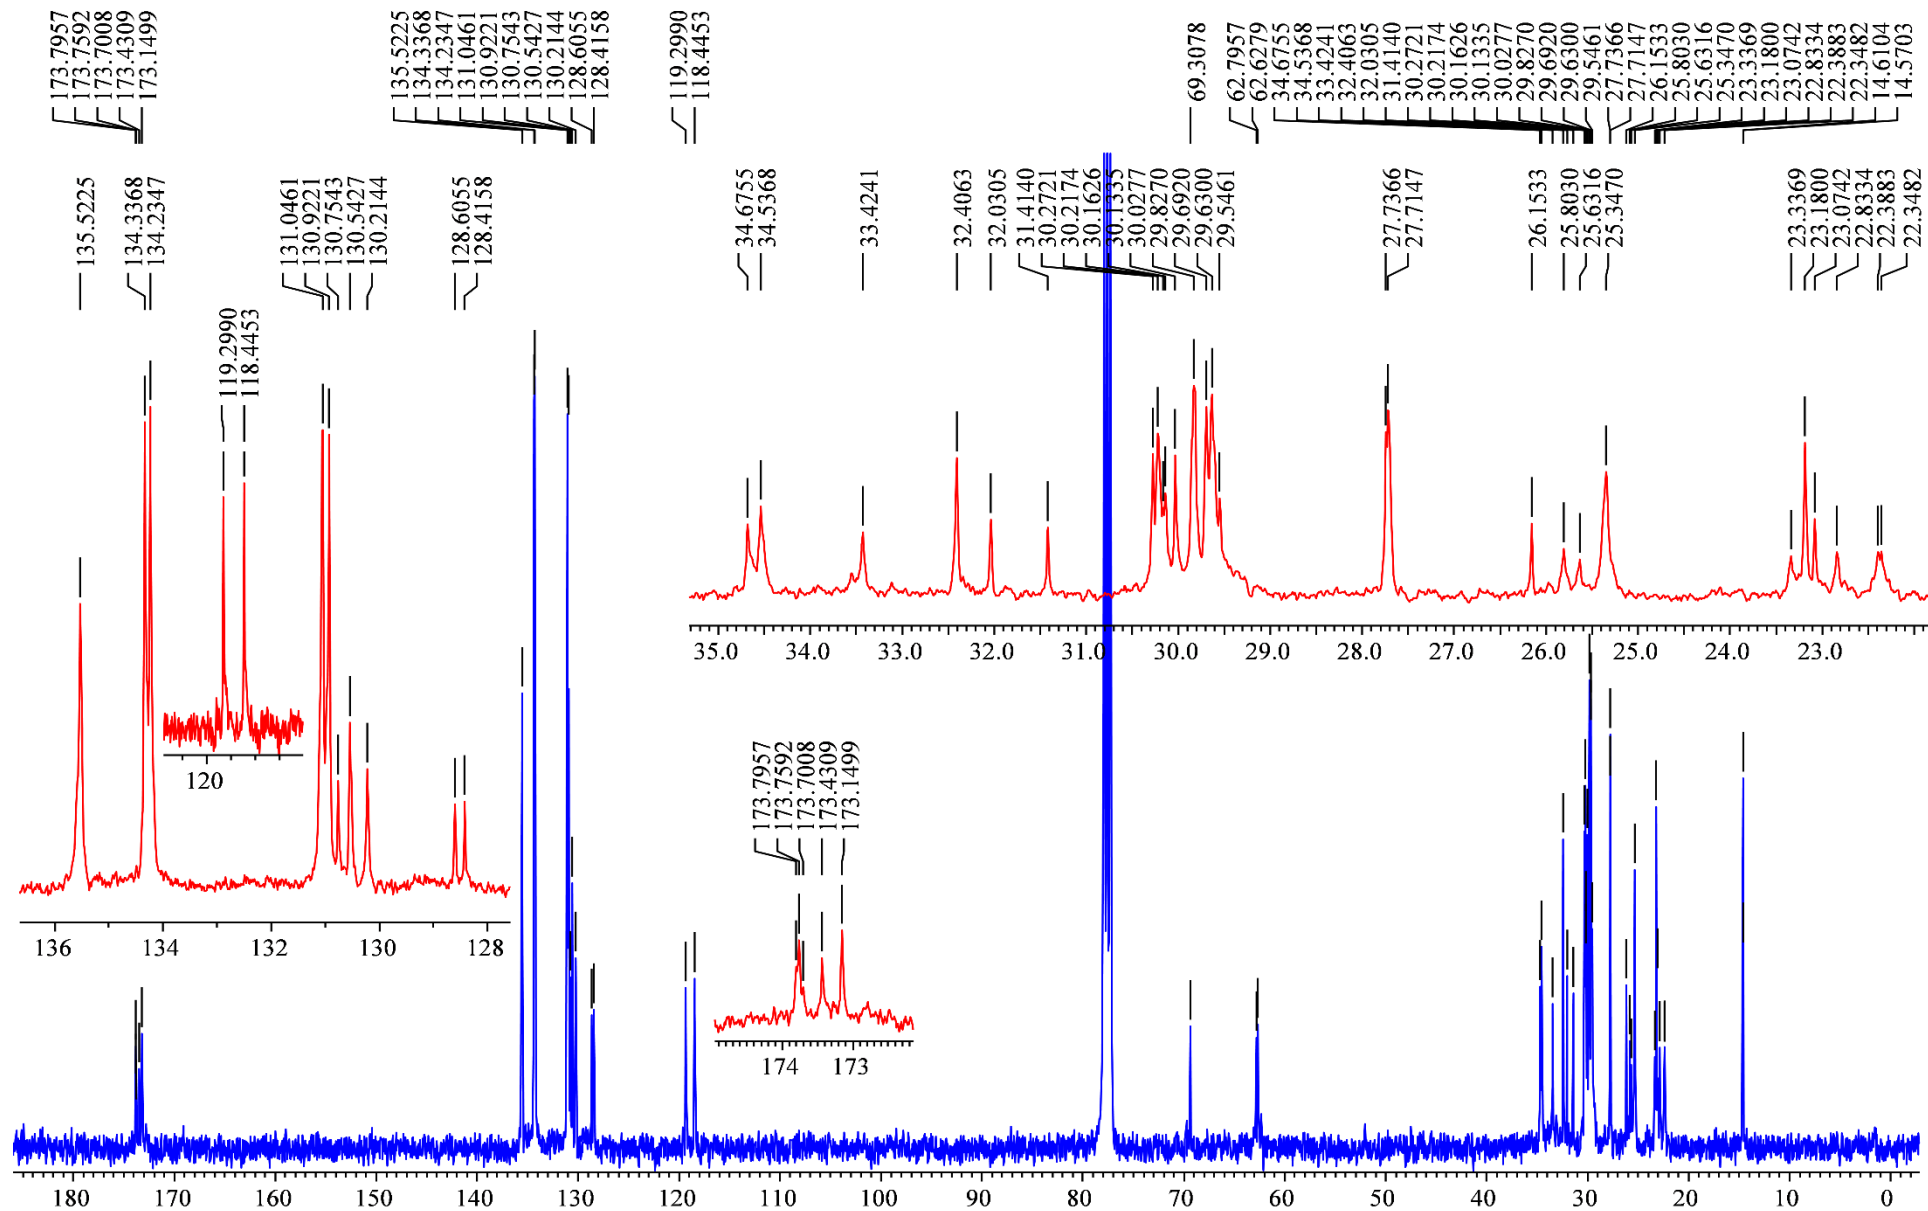

Figure S42.  $^{13}\text{C}$ - $\{^1\text{H}\}$  NMR spectrum (100.6 MHz,  $\text{CDCl}_3$ ) of compound 7.

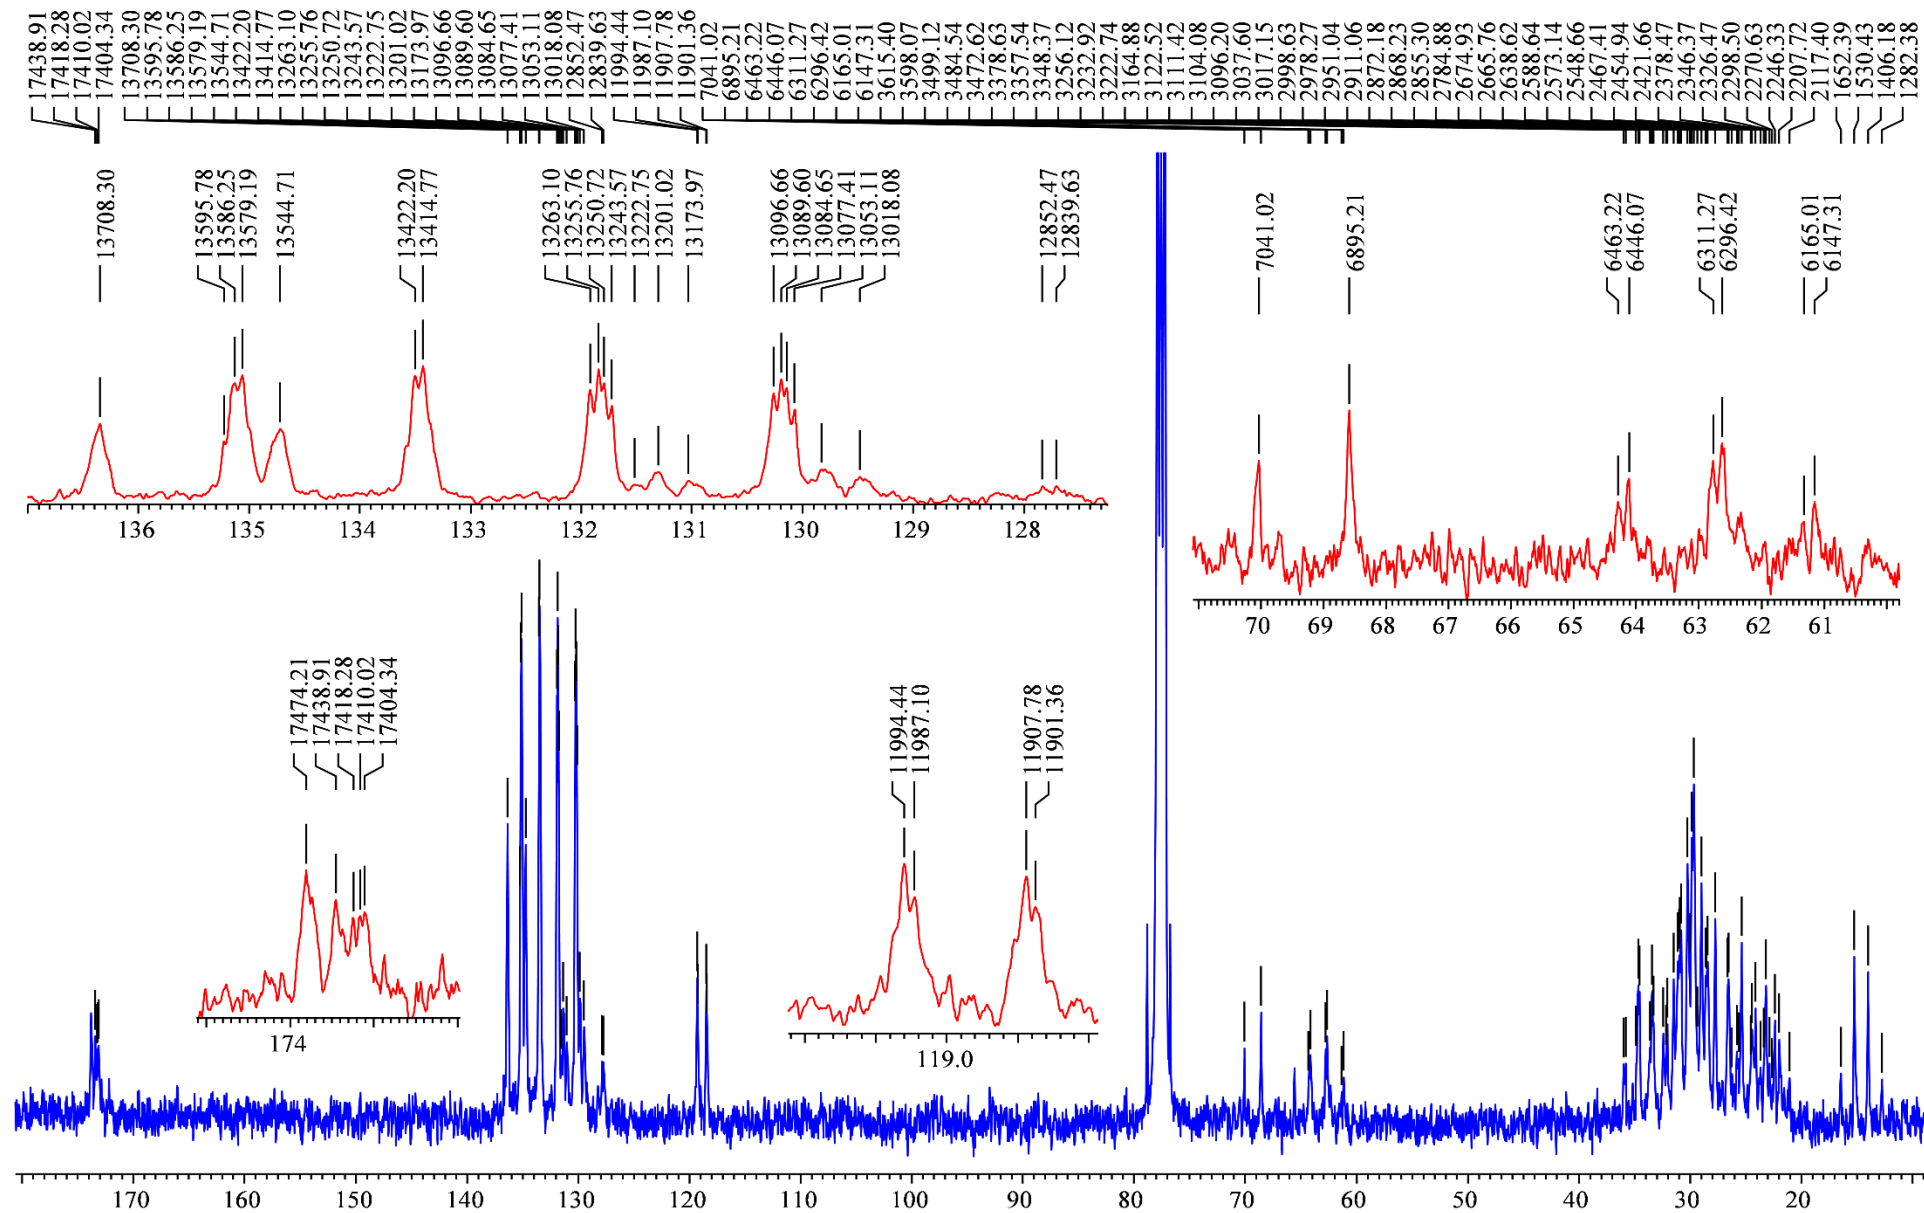

Figure S43.  $^{13}\text{C}$  NMR spectrum (100.6 MHz,  $\text{CDCl}_3$ ) of compound 7.

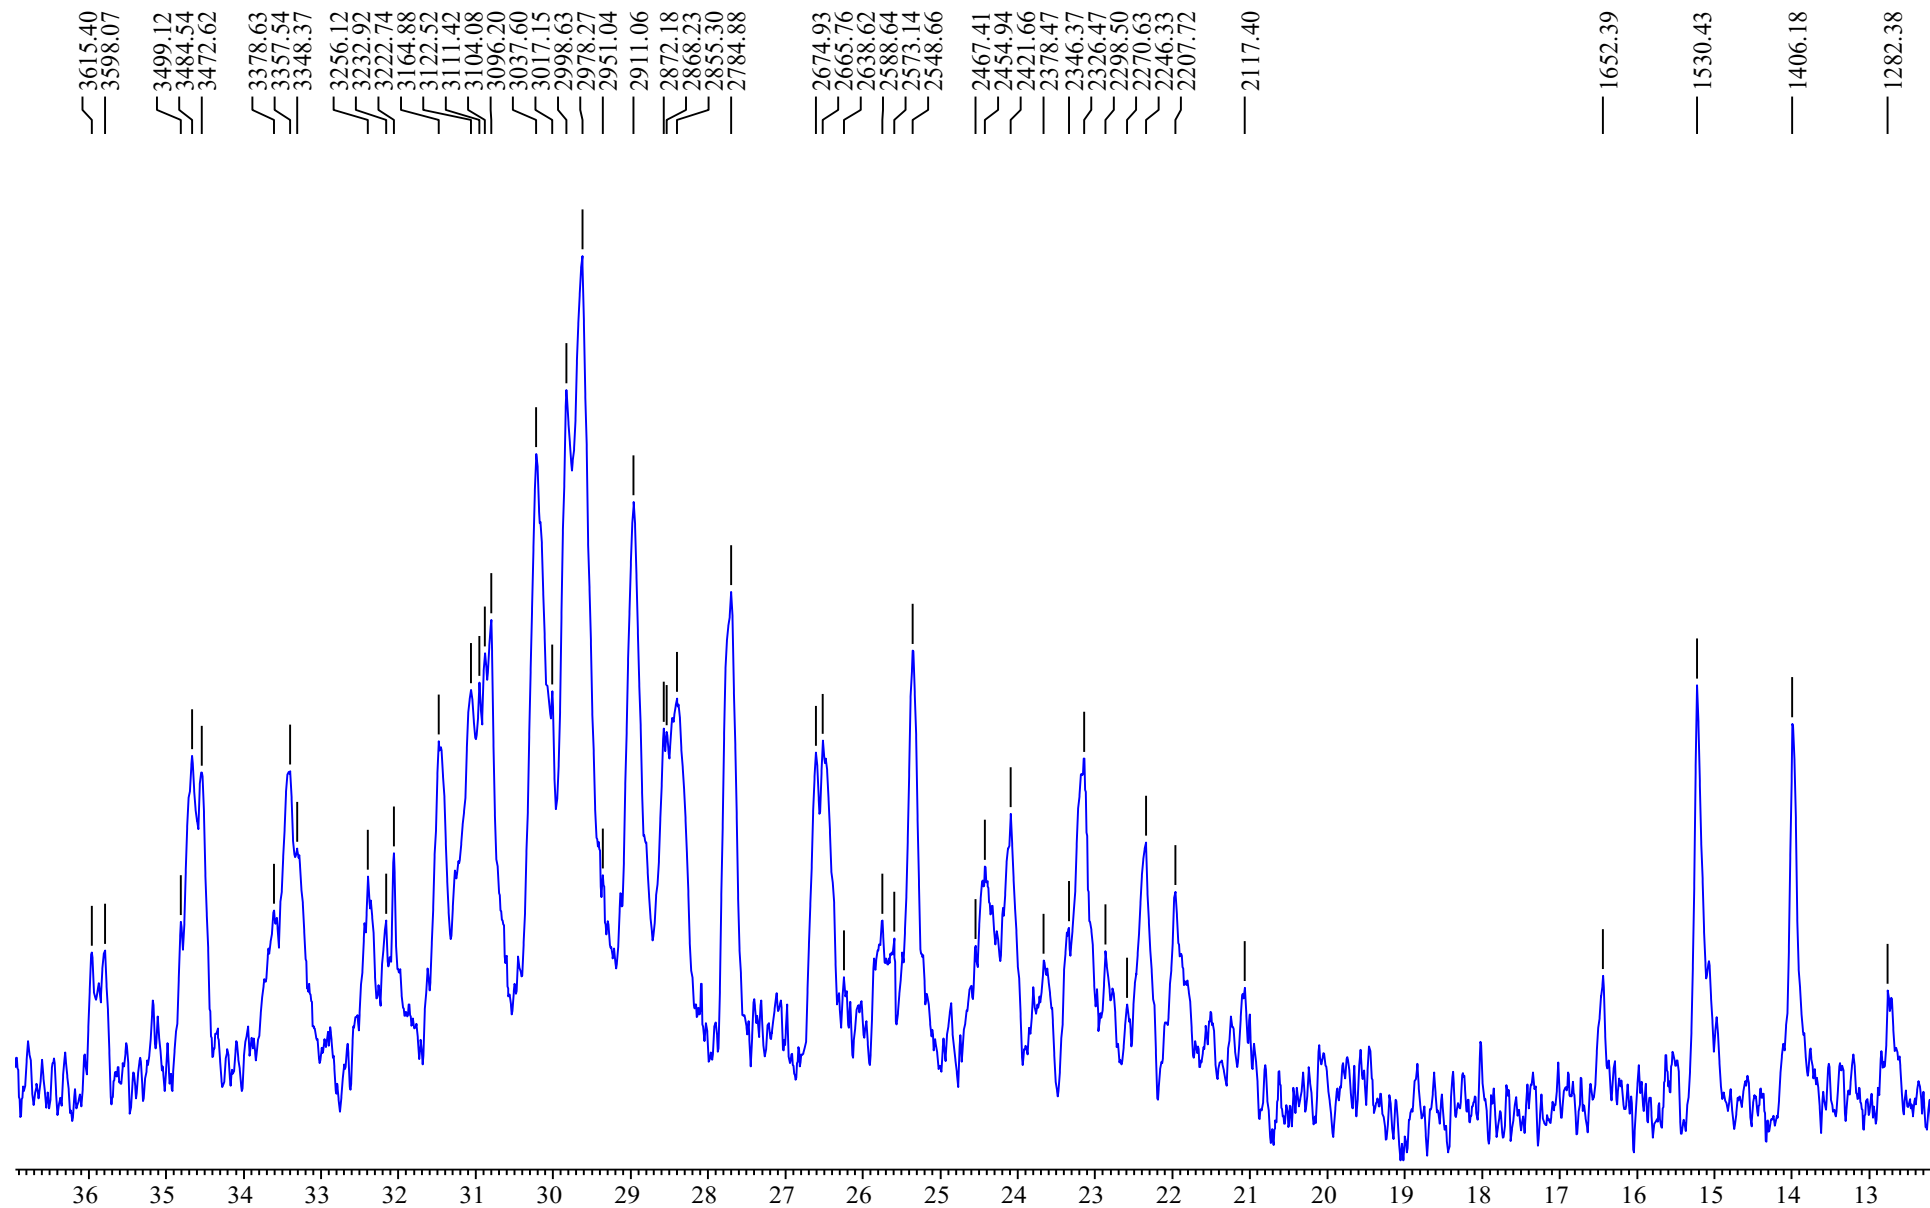

Figure S44. High-field region of  $^{13}\text{C}$  NMR spectrum (100.6 MHz,  $\text{CDCl}_3$ ) of compound 7.



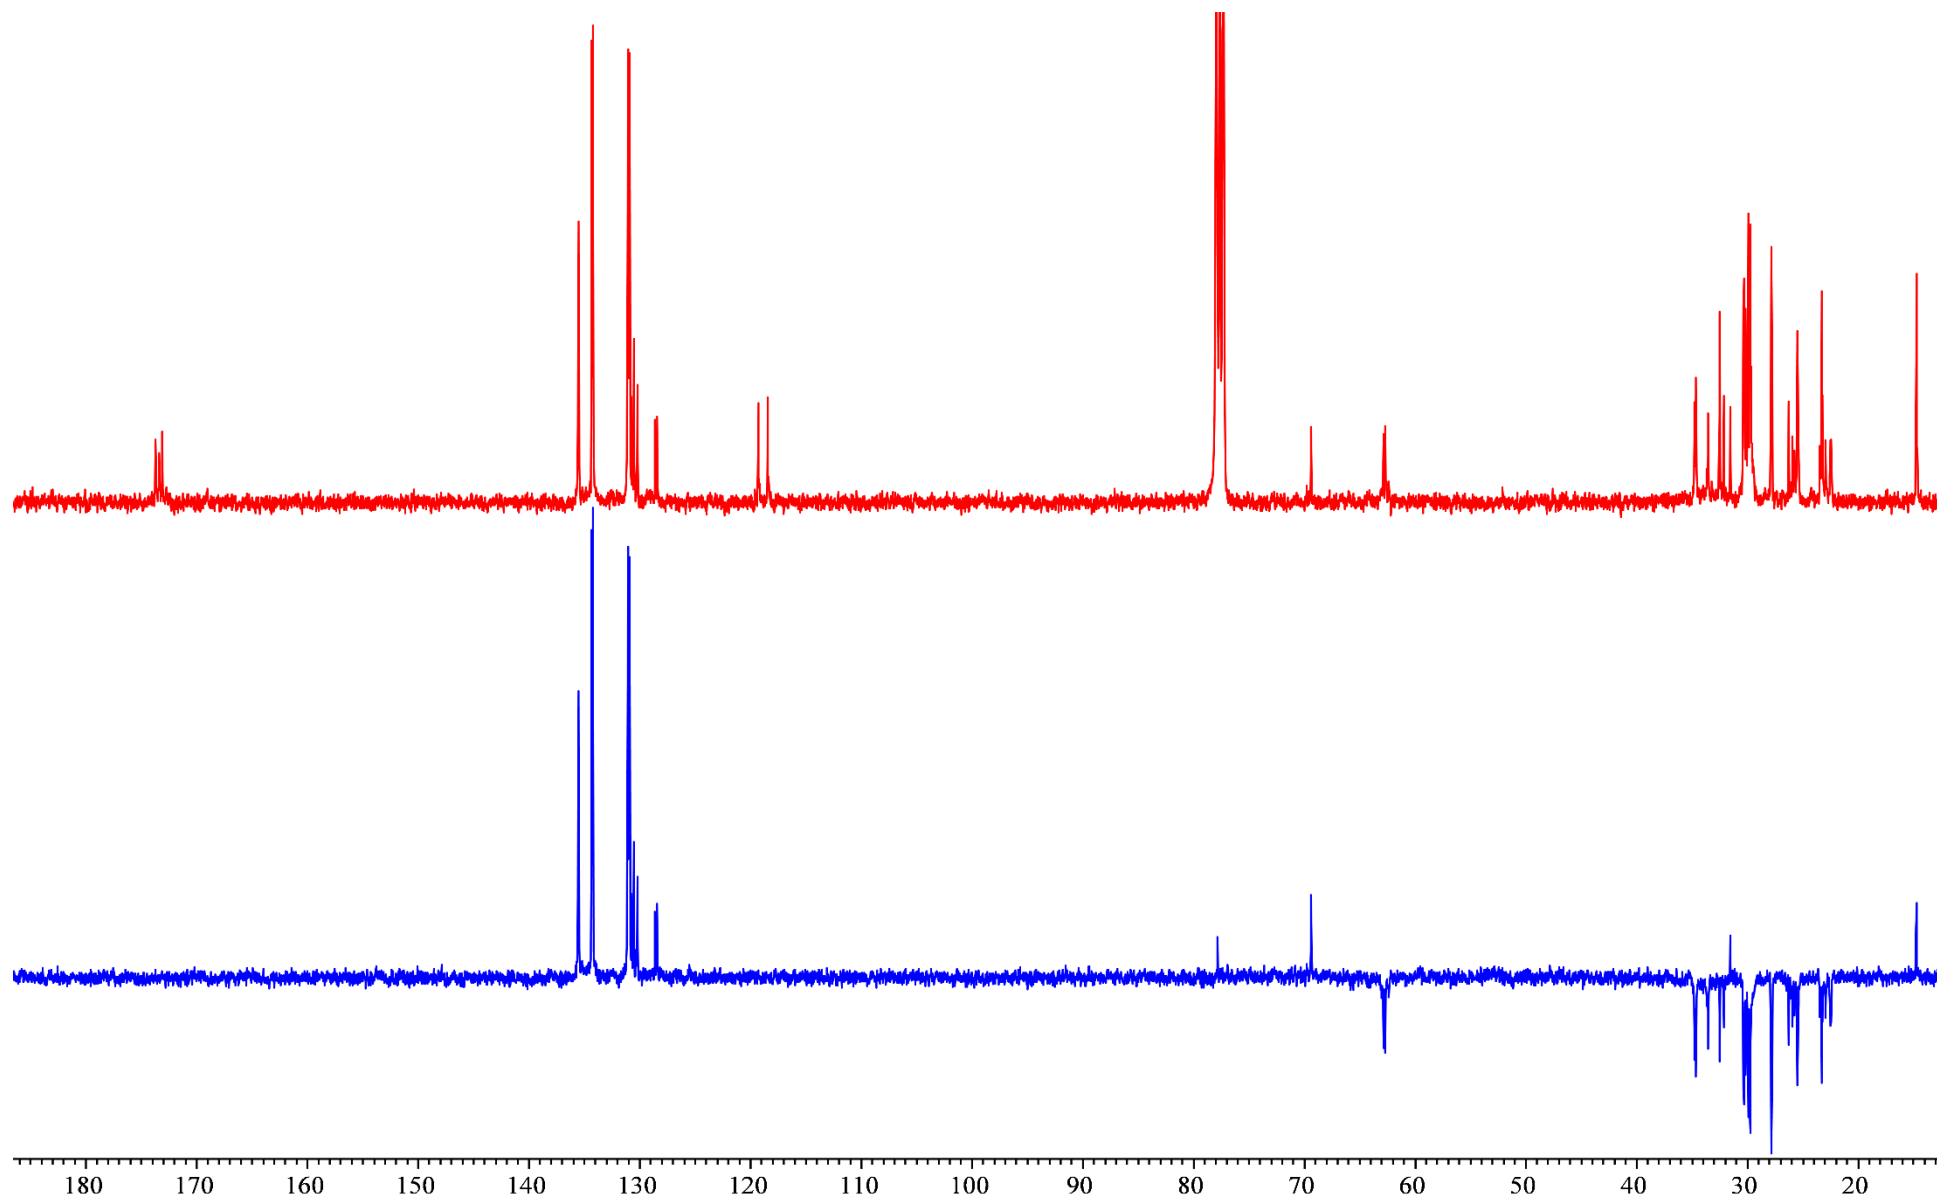

Figure S45.  $^{13}\text{C}$ - $\{^1\text{H}\}$  and  $^{13}\text{C}$ - $\{^1\text{H}\}$ -dept NMR spectra (100.6 MHz,  $\text{CDCl}_3$ ) of compound 7.

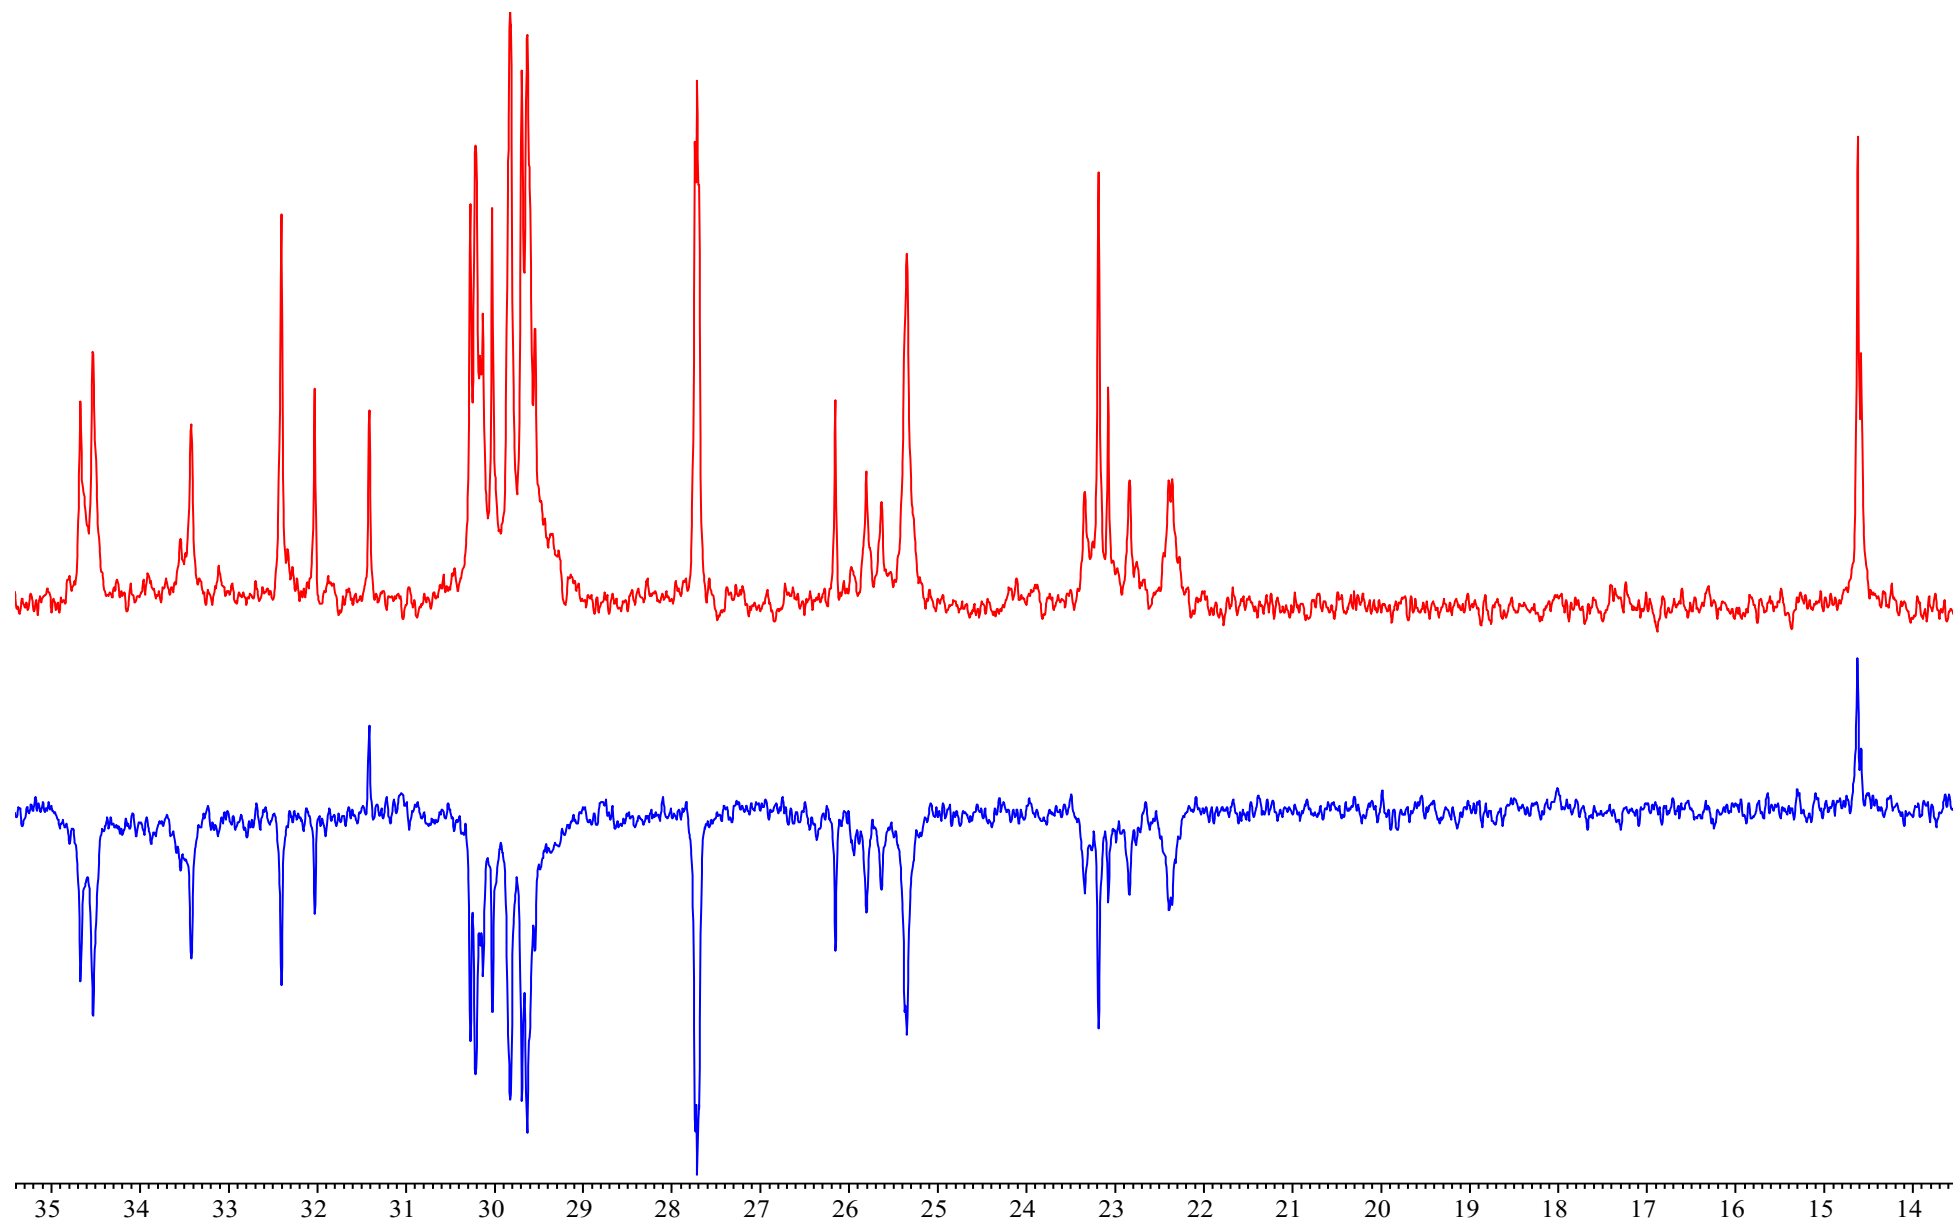

Figure S46. High-field region of  $^{13}\text{C}\{-^1\text{H}\}$  and  $^{13}\text{C}\{-^1\text{H}\}$ -dept NMR spectra (100.6 MHz,  $\text{CDCl}_3$ ) of compound 7.

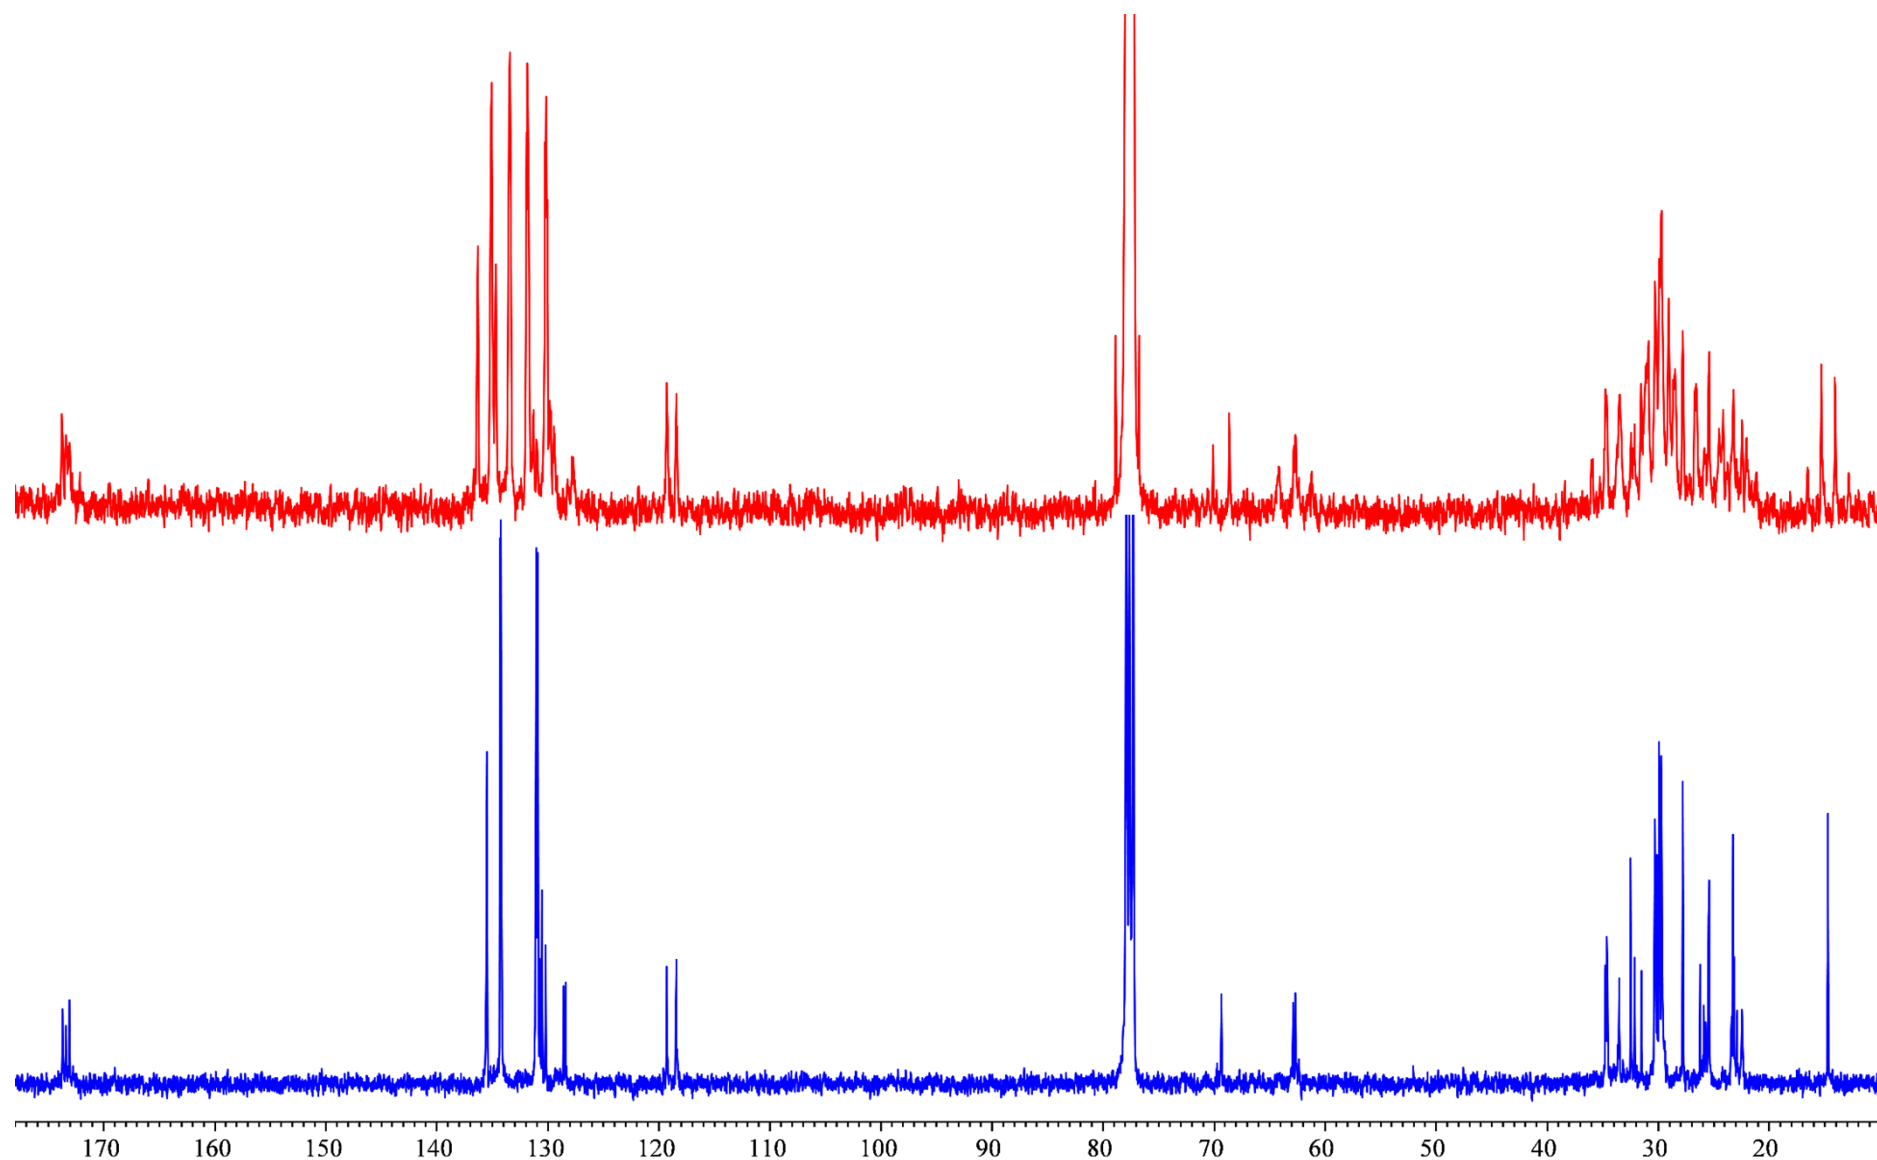

Figure S47.  $^{13}\text{C}\{-^1\text{H}\}$  and  $^{13}\text{C}$  NMR spectra (100.6 MHz,  $\text{CDCl}_3$ ) of compound 7.

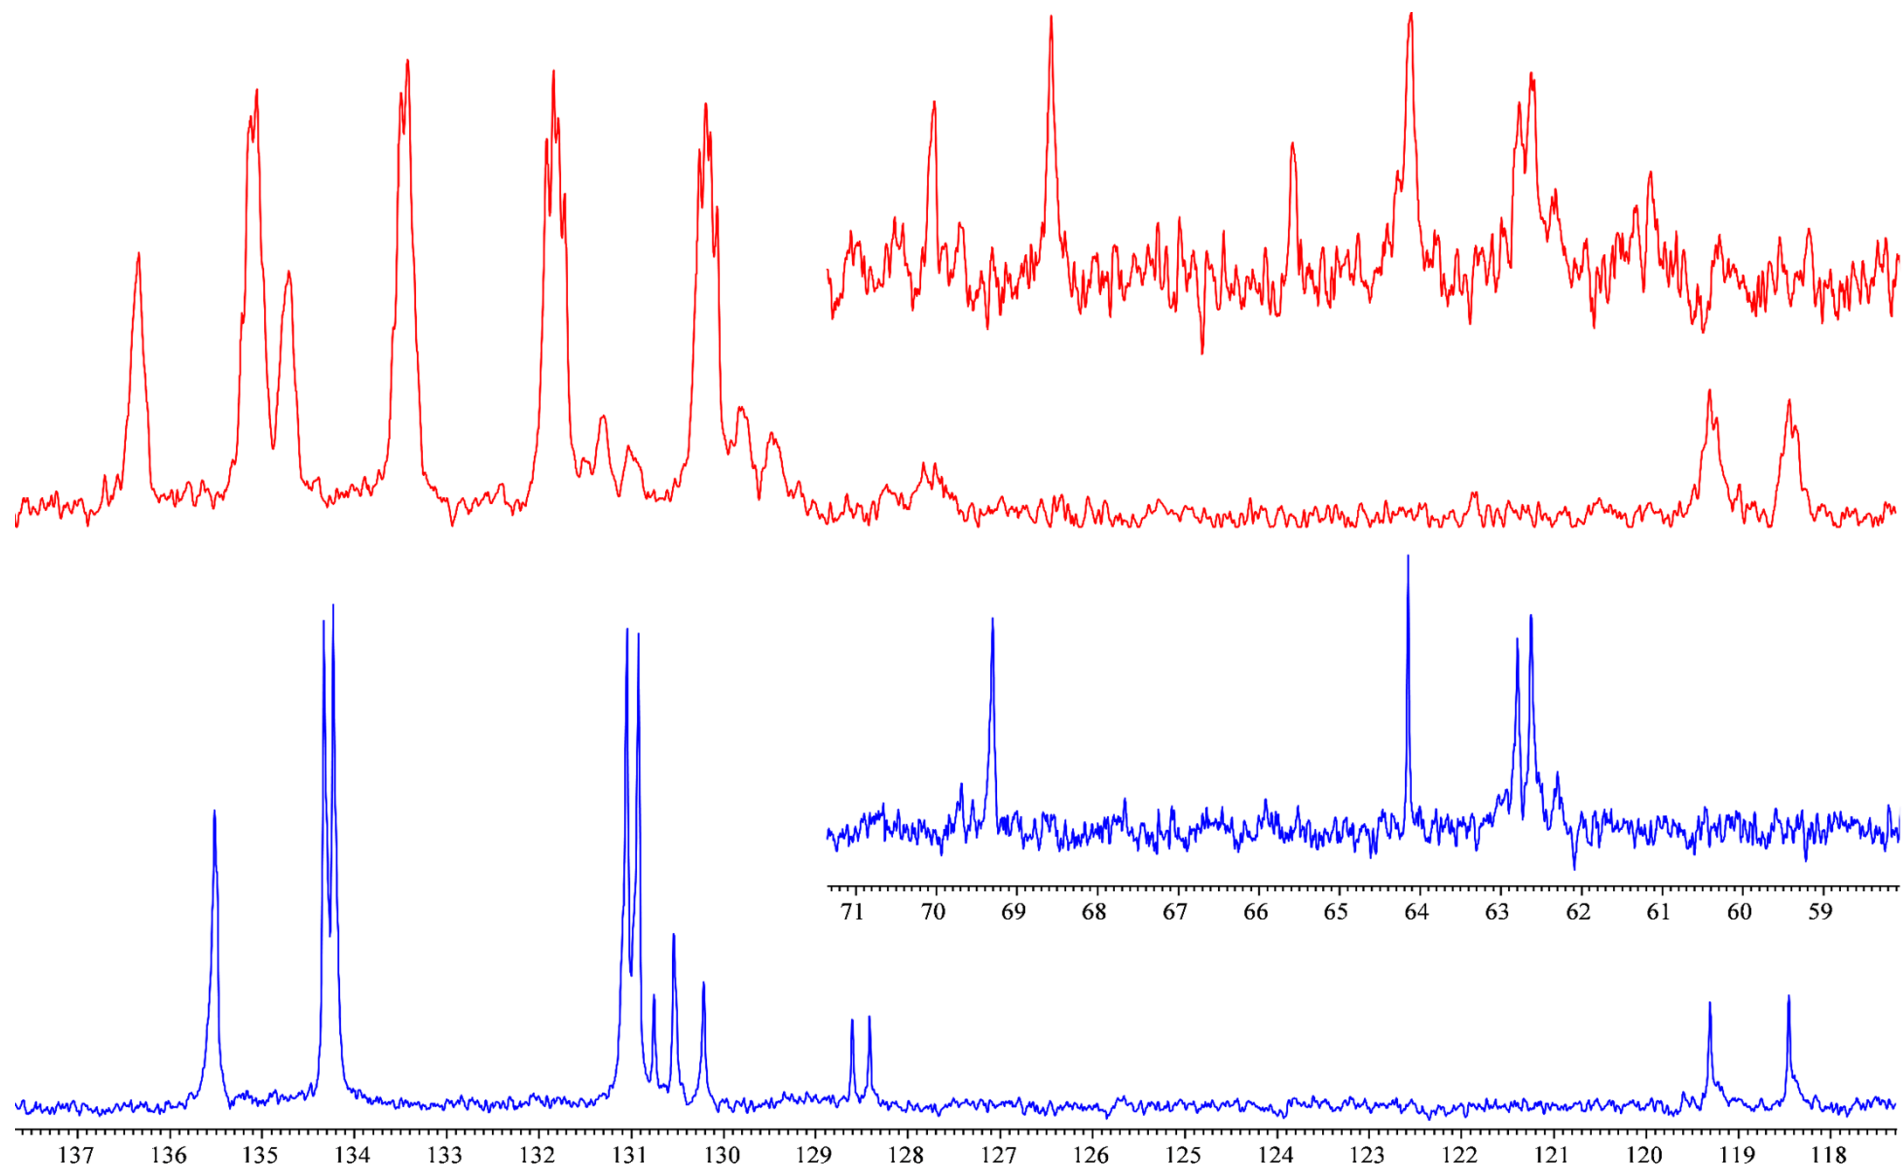

Figure S48. Aromatic carbons region of  $^{13}\text{C}$ - $\{^1\text{H}\}$  and  $^{13}\text{C}$  NMR spectra (100.6 MHz,  $\text{CDCl}_3$ ) of compound 7.

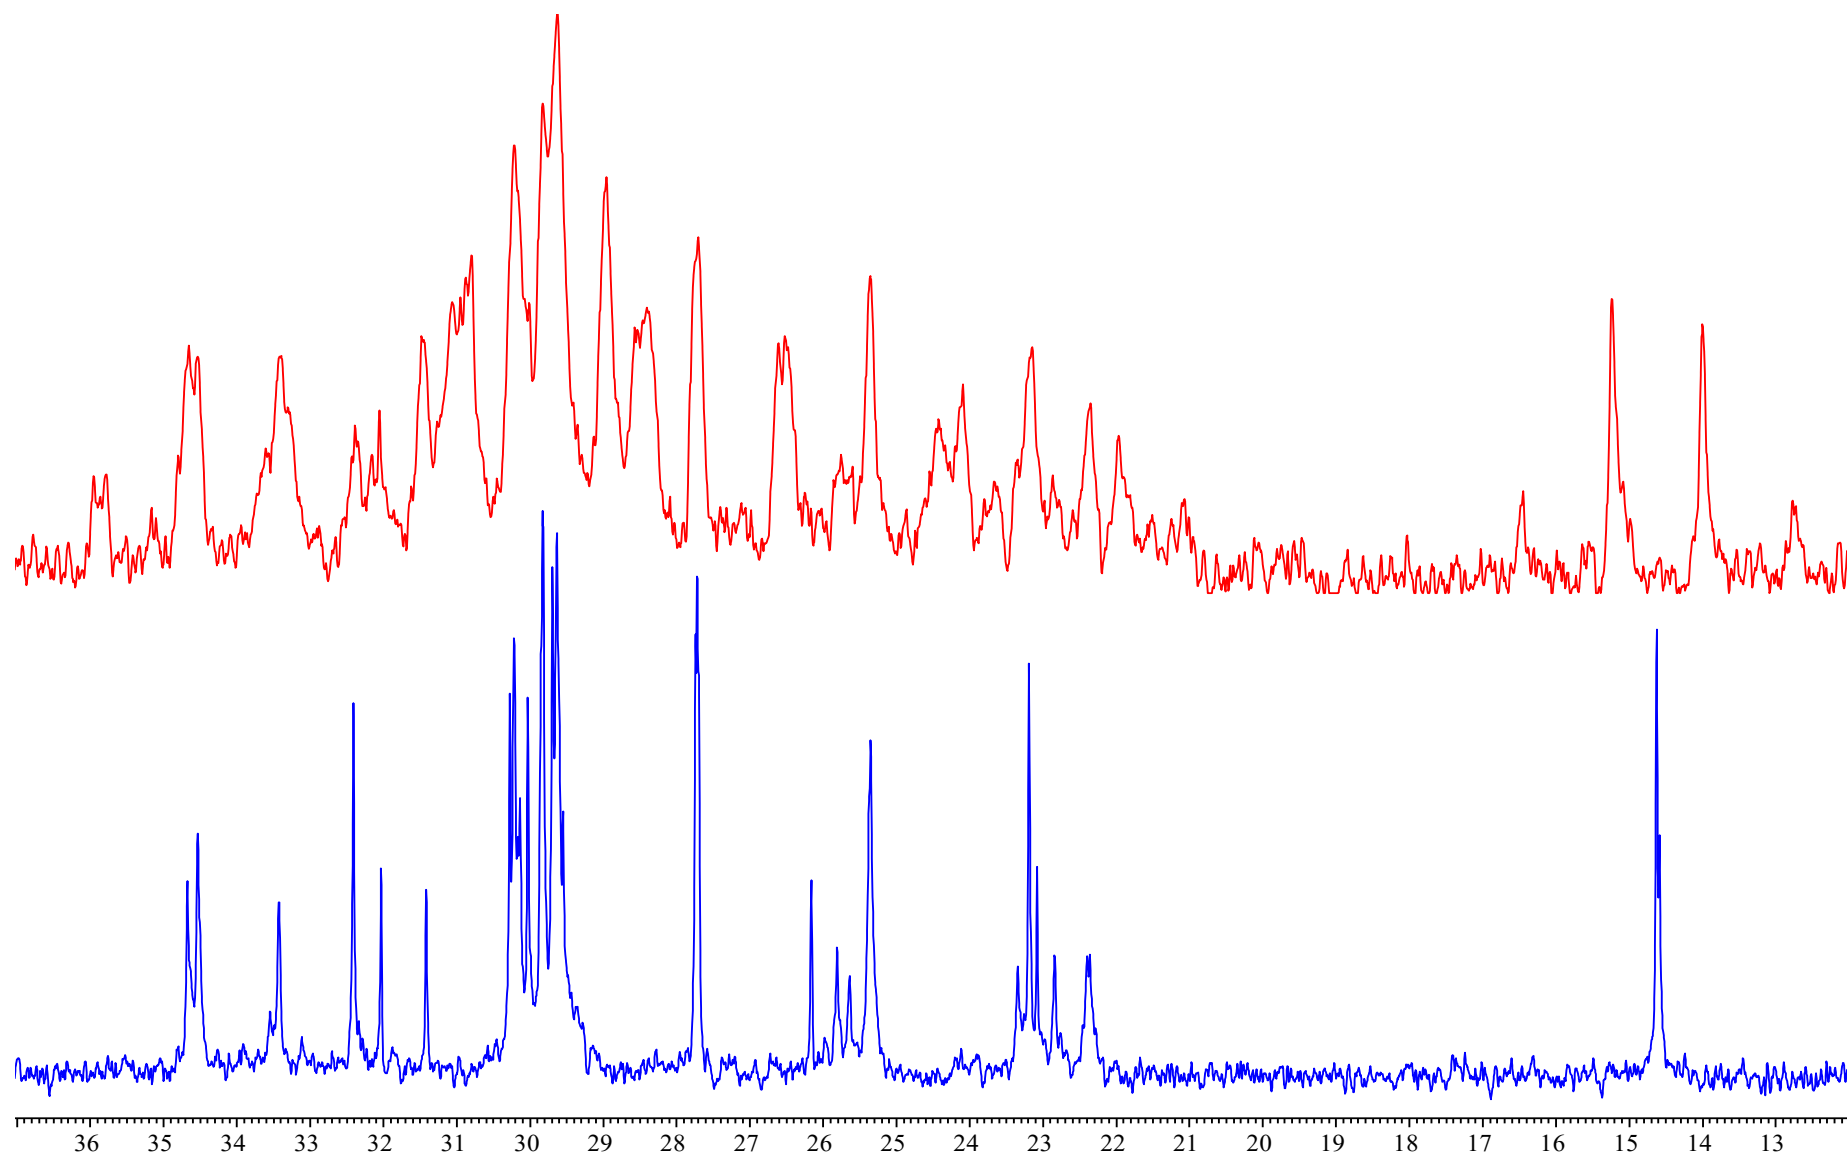

Figure S49. High-field region of  $^{13}\text{C}\{-^1\text{H}\}$  and  $^{13}\text{C}$  NMR spectra (100.6 MHz,  $\text{CDCl}_3$ ) of compound 7.

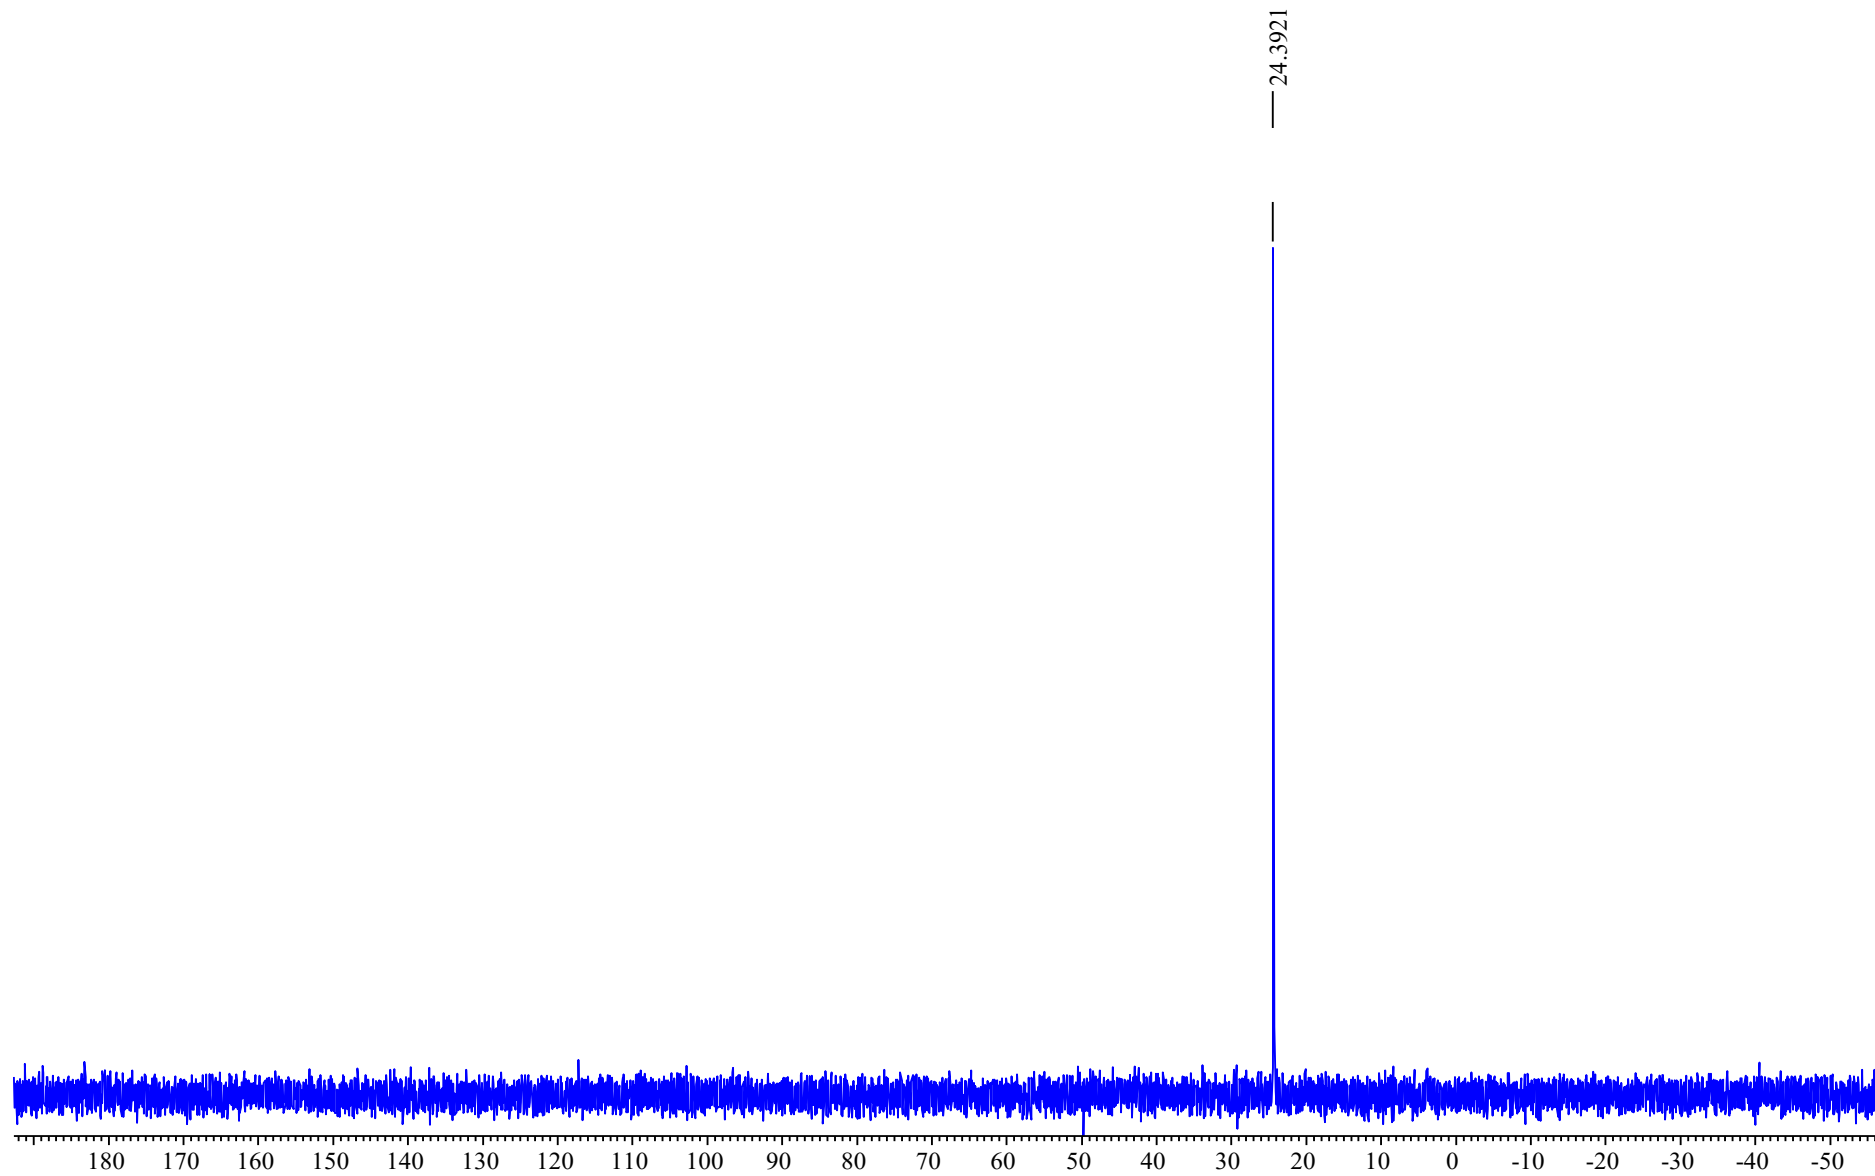

Figure S50.  $^{31}\text{P}\{-^1\text{H}\}$  NMR spectrum (162 MHz,  $\text{CDCl}_3$ ) of compound 7.

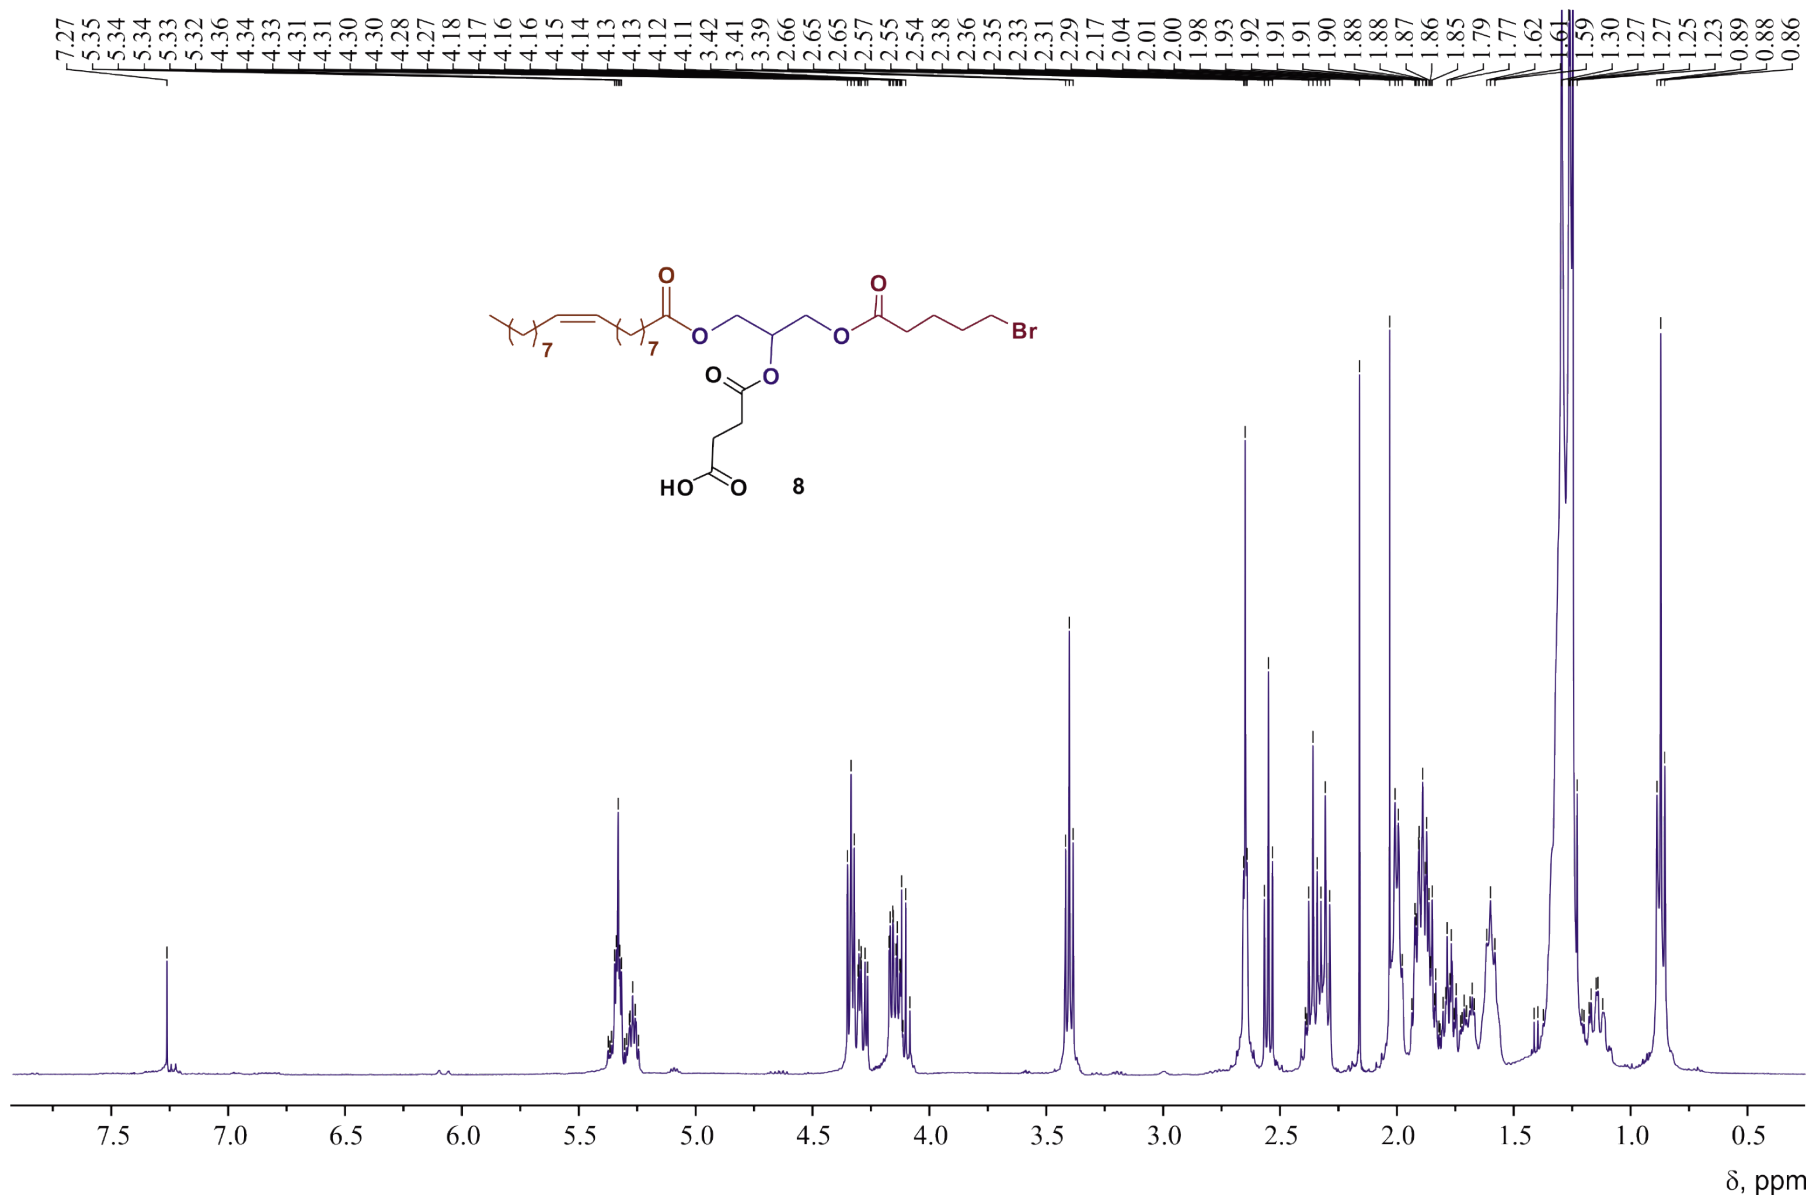

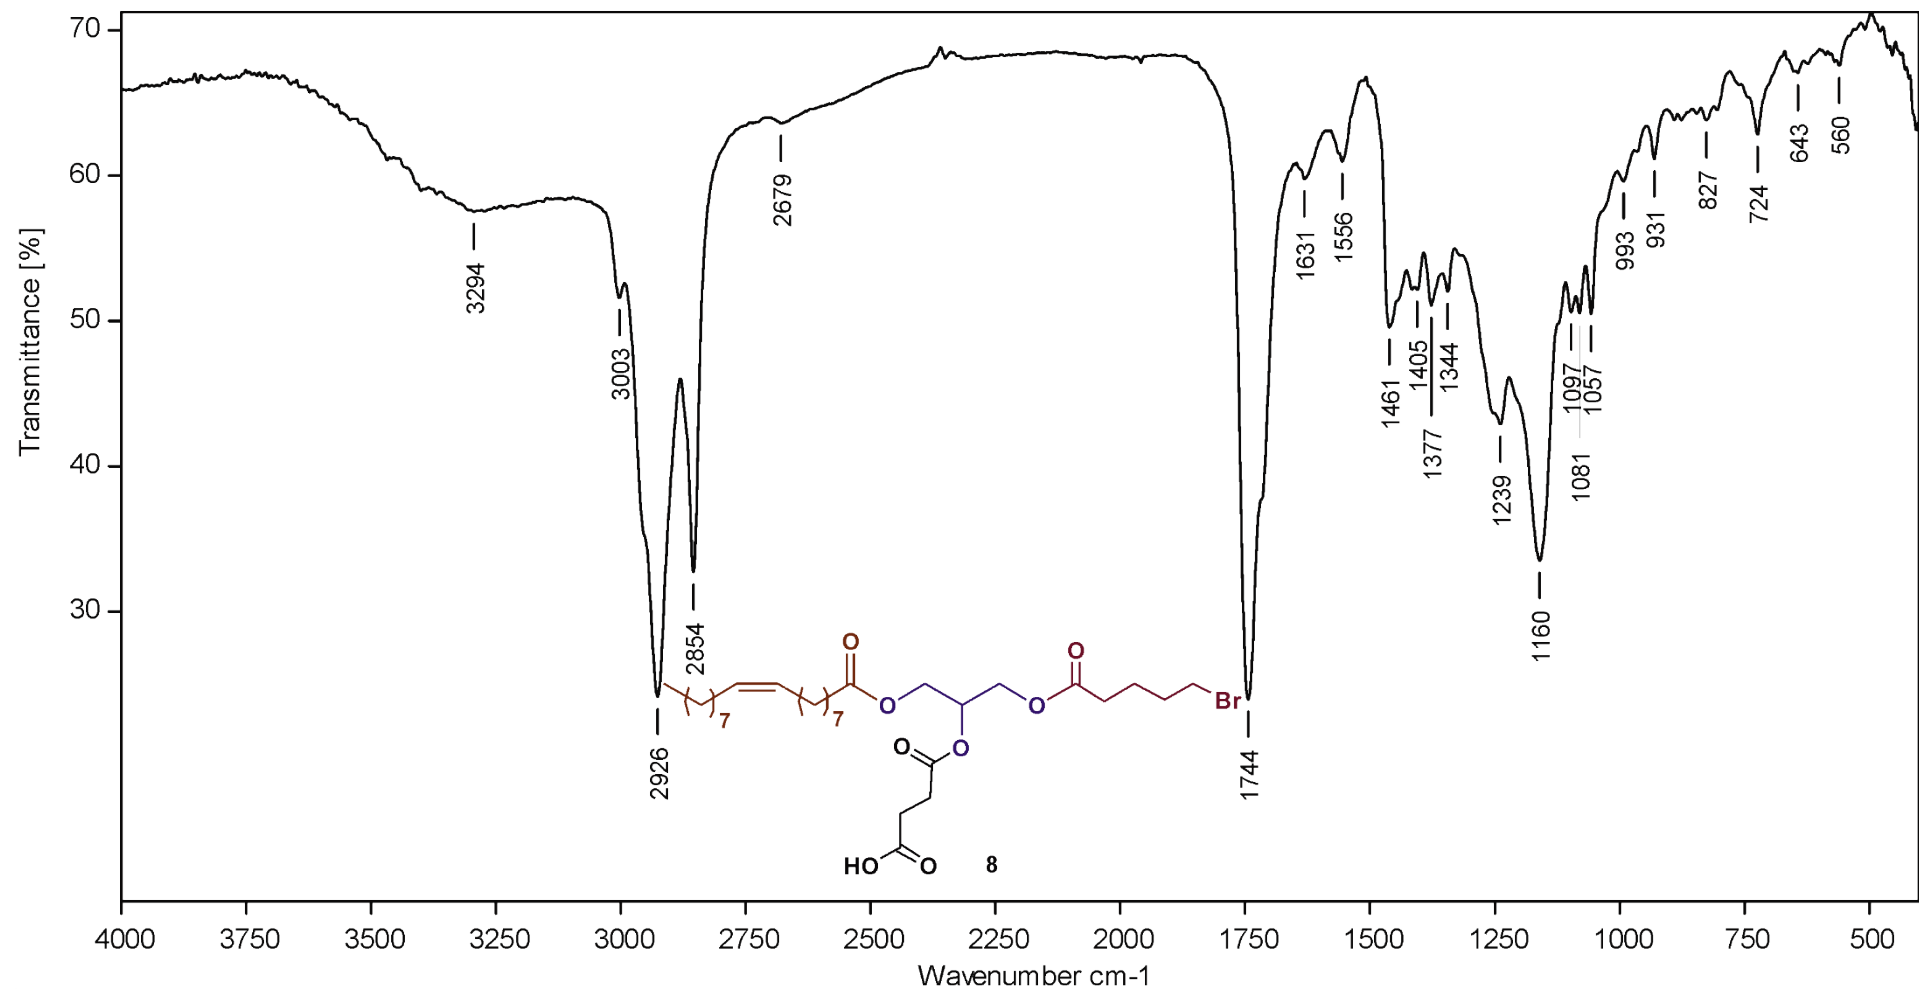

Figure S52. IR (KBr) spectrum of **8**.



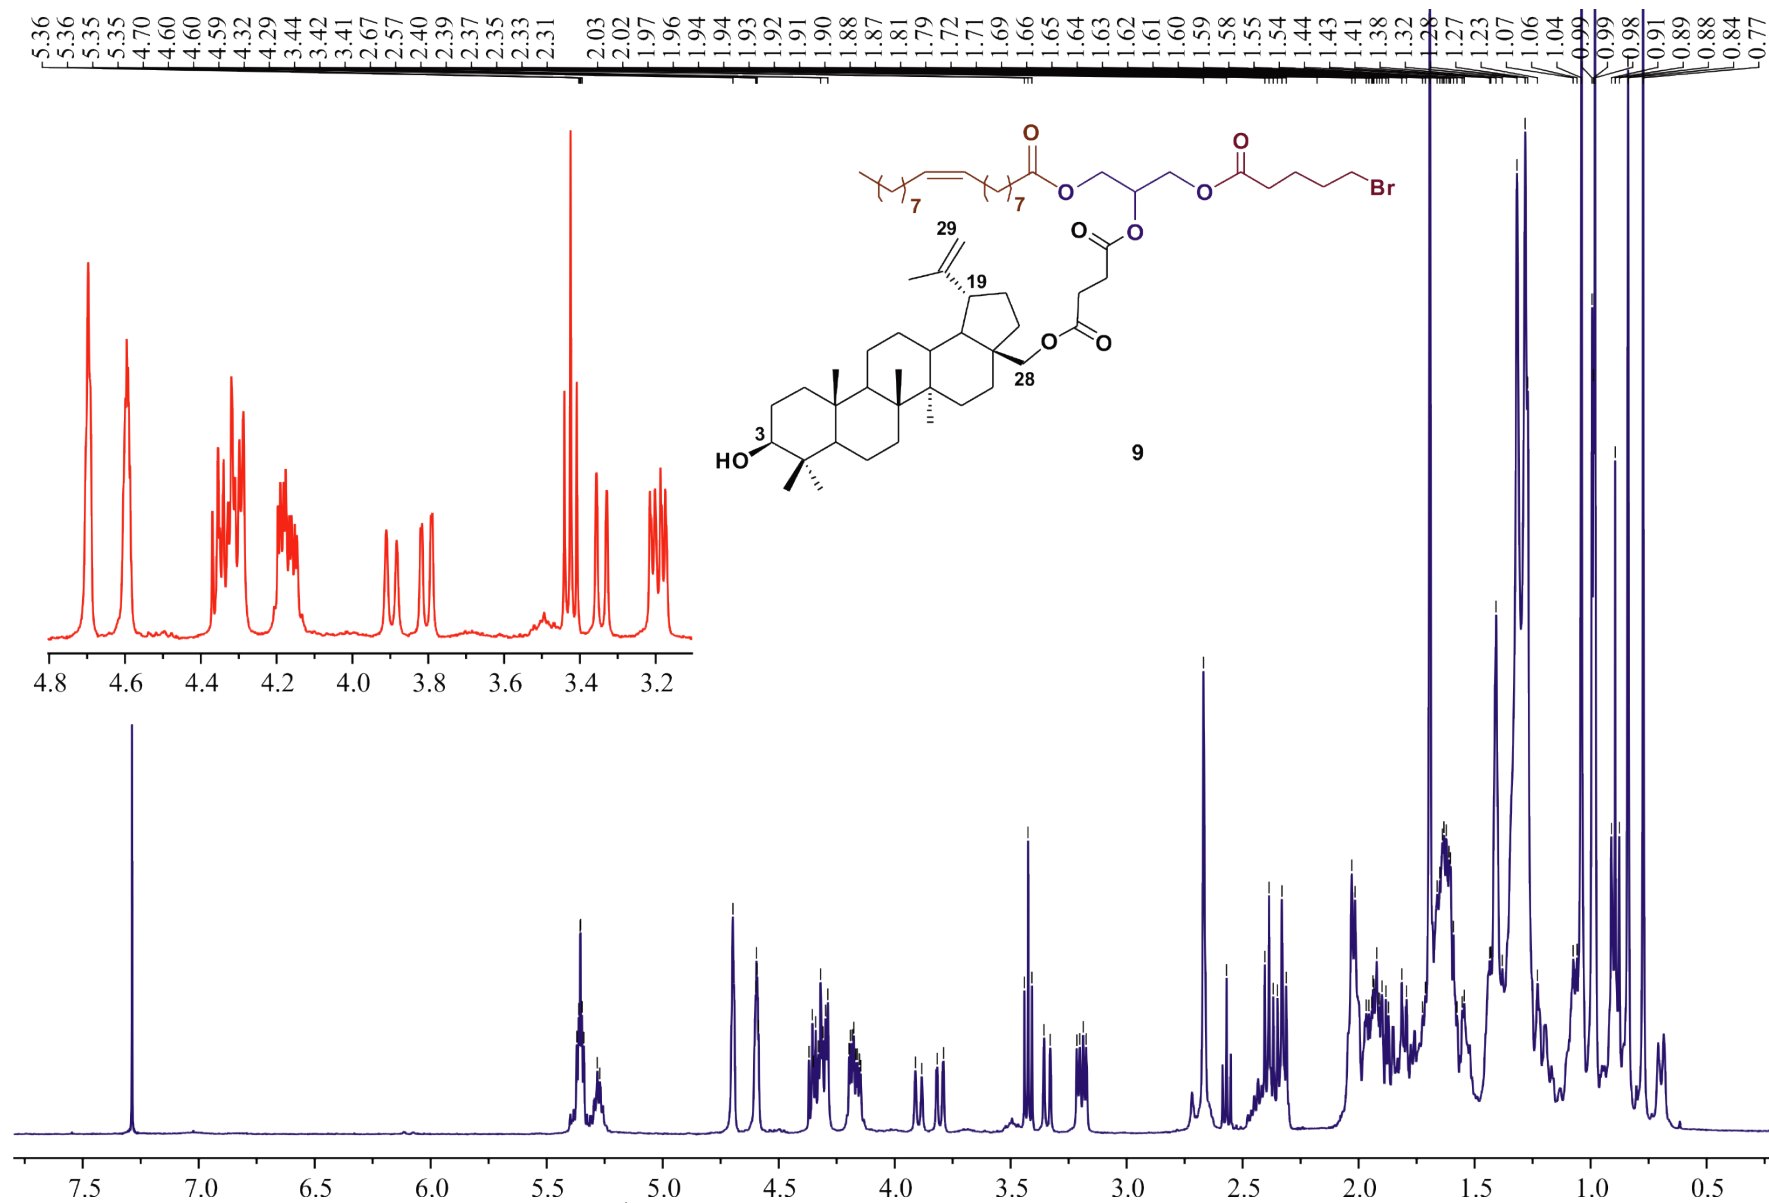

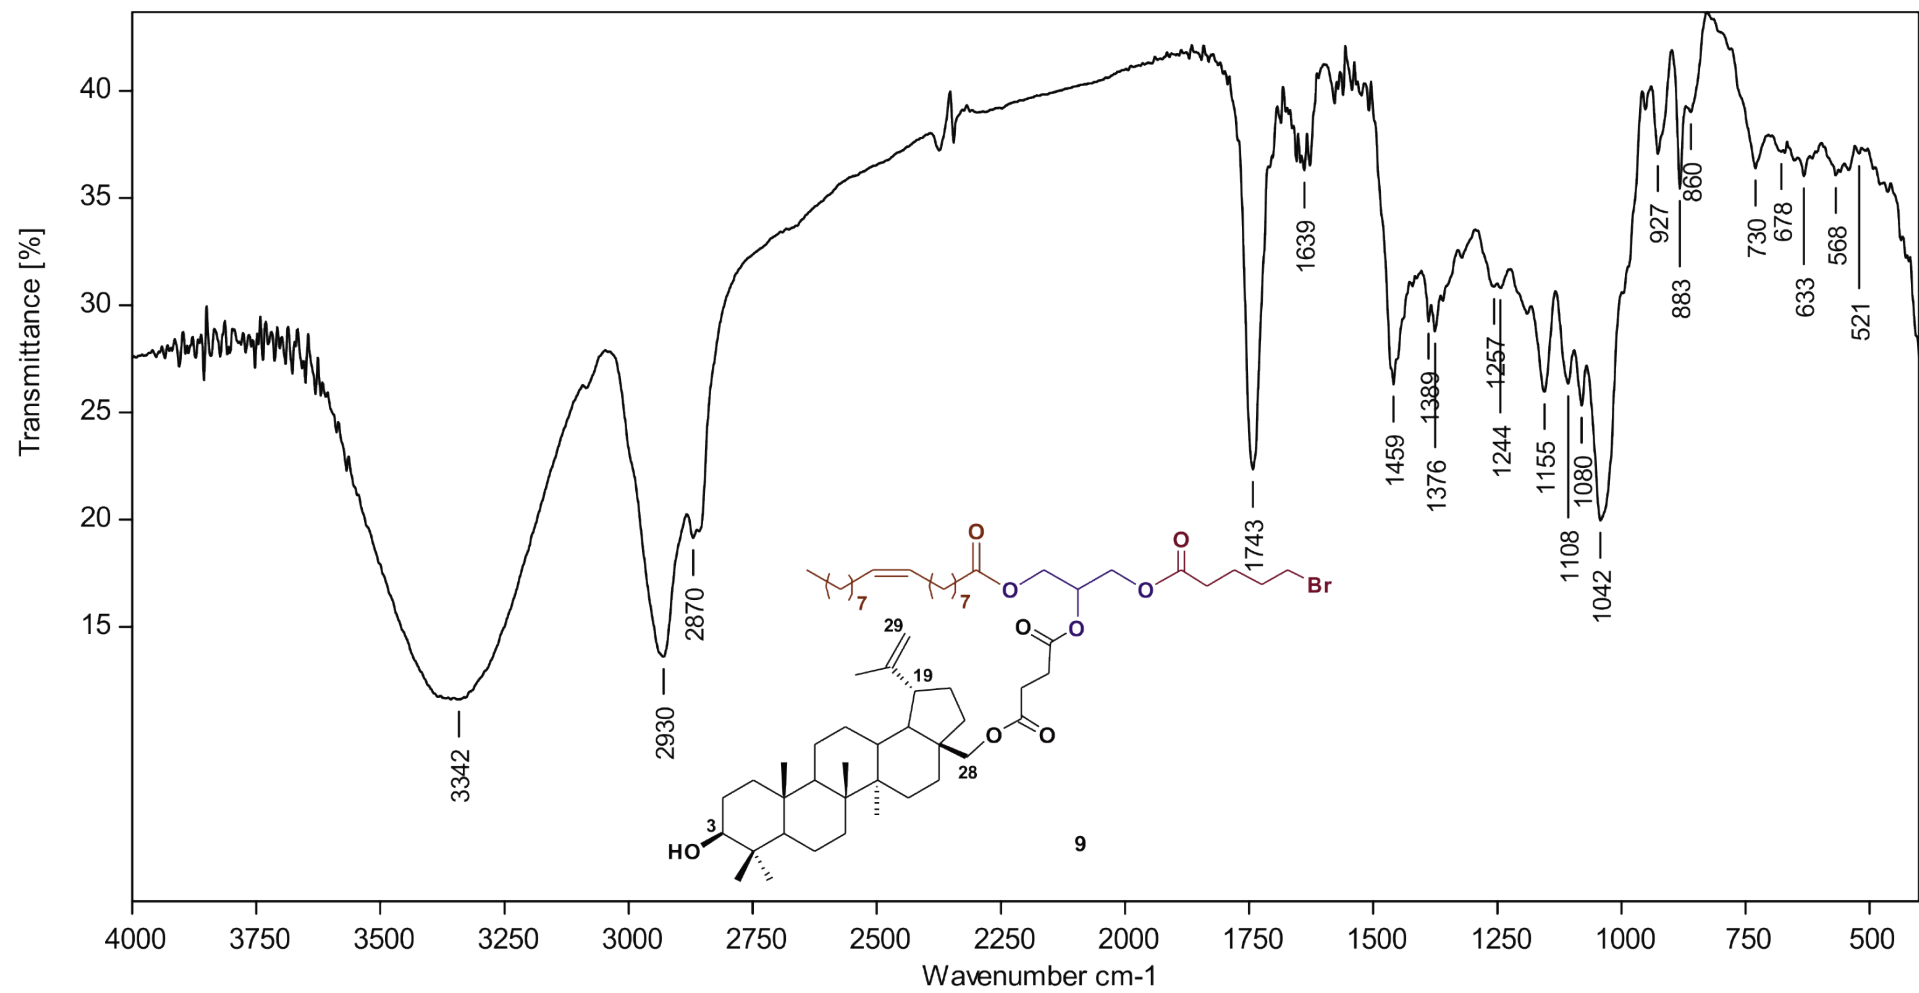

Figure S54. IR (KBr) spectrum of **9**.

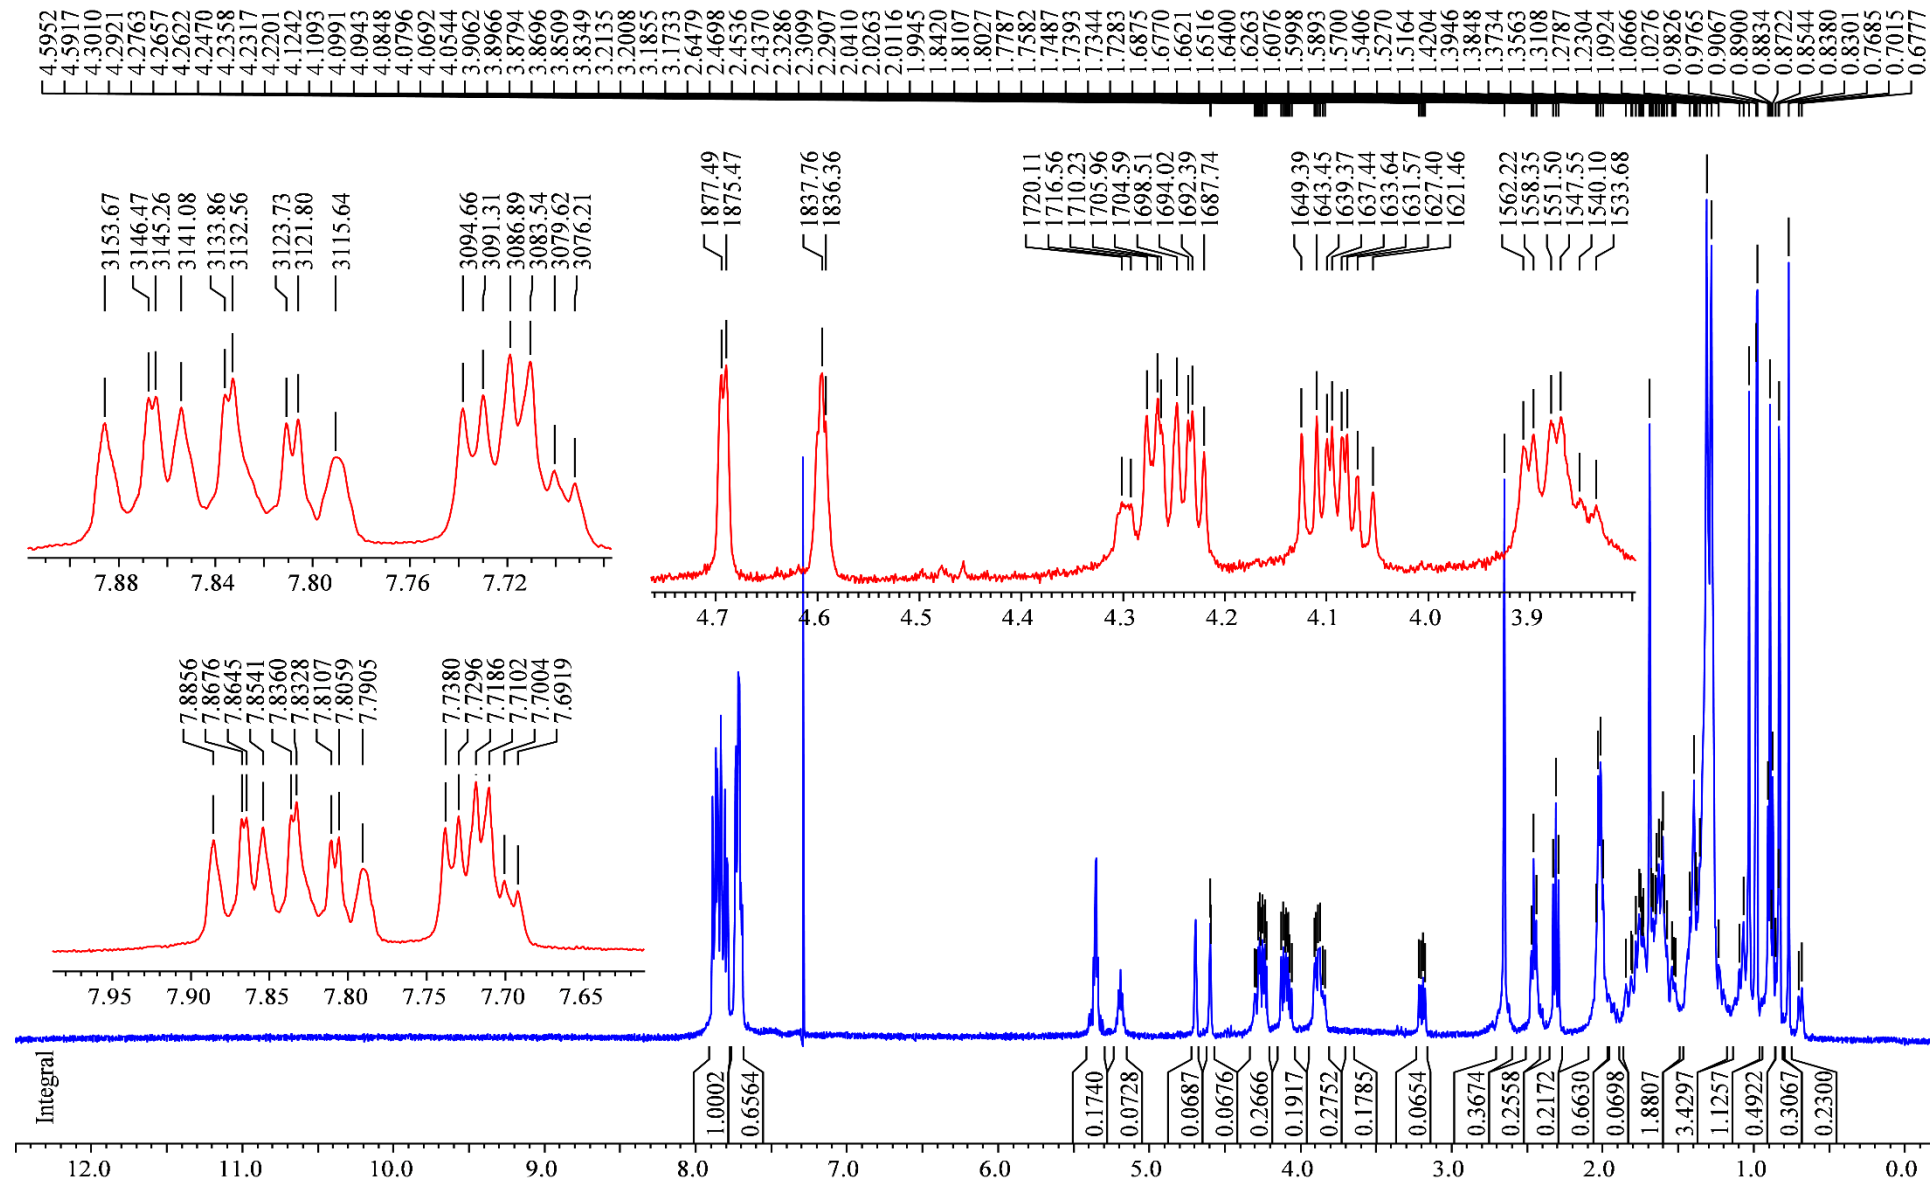

Figure S55. <sup>1</sup>H NMR spectrum (400 MHz, CDCl<sub>3</sub>) of compound 10.

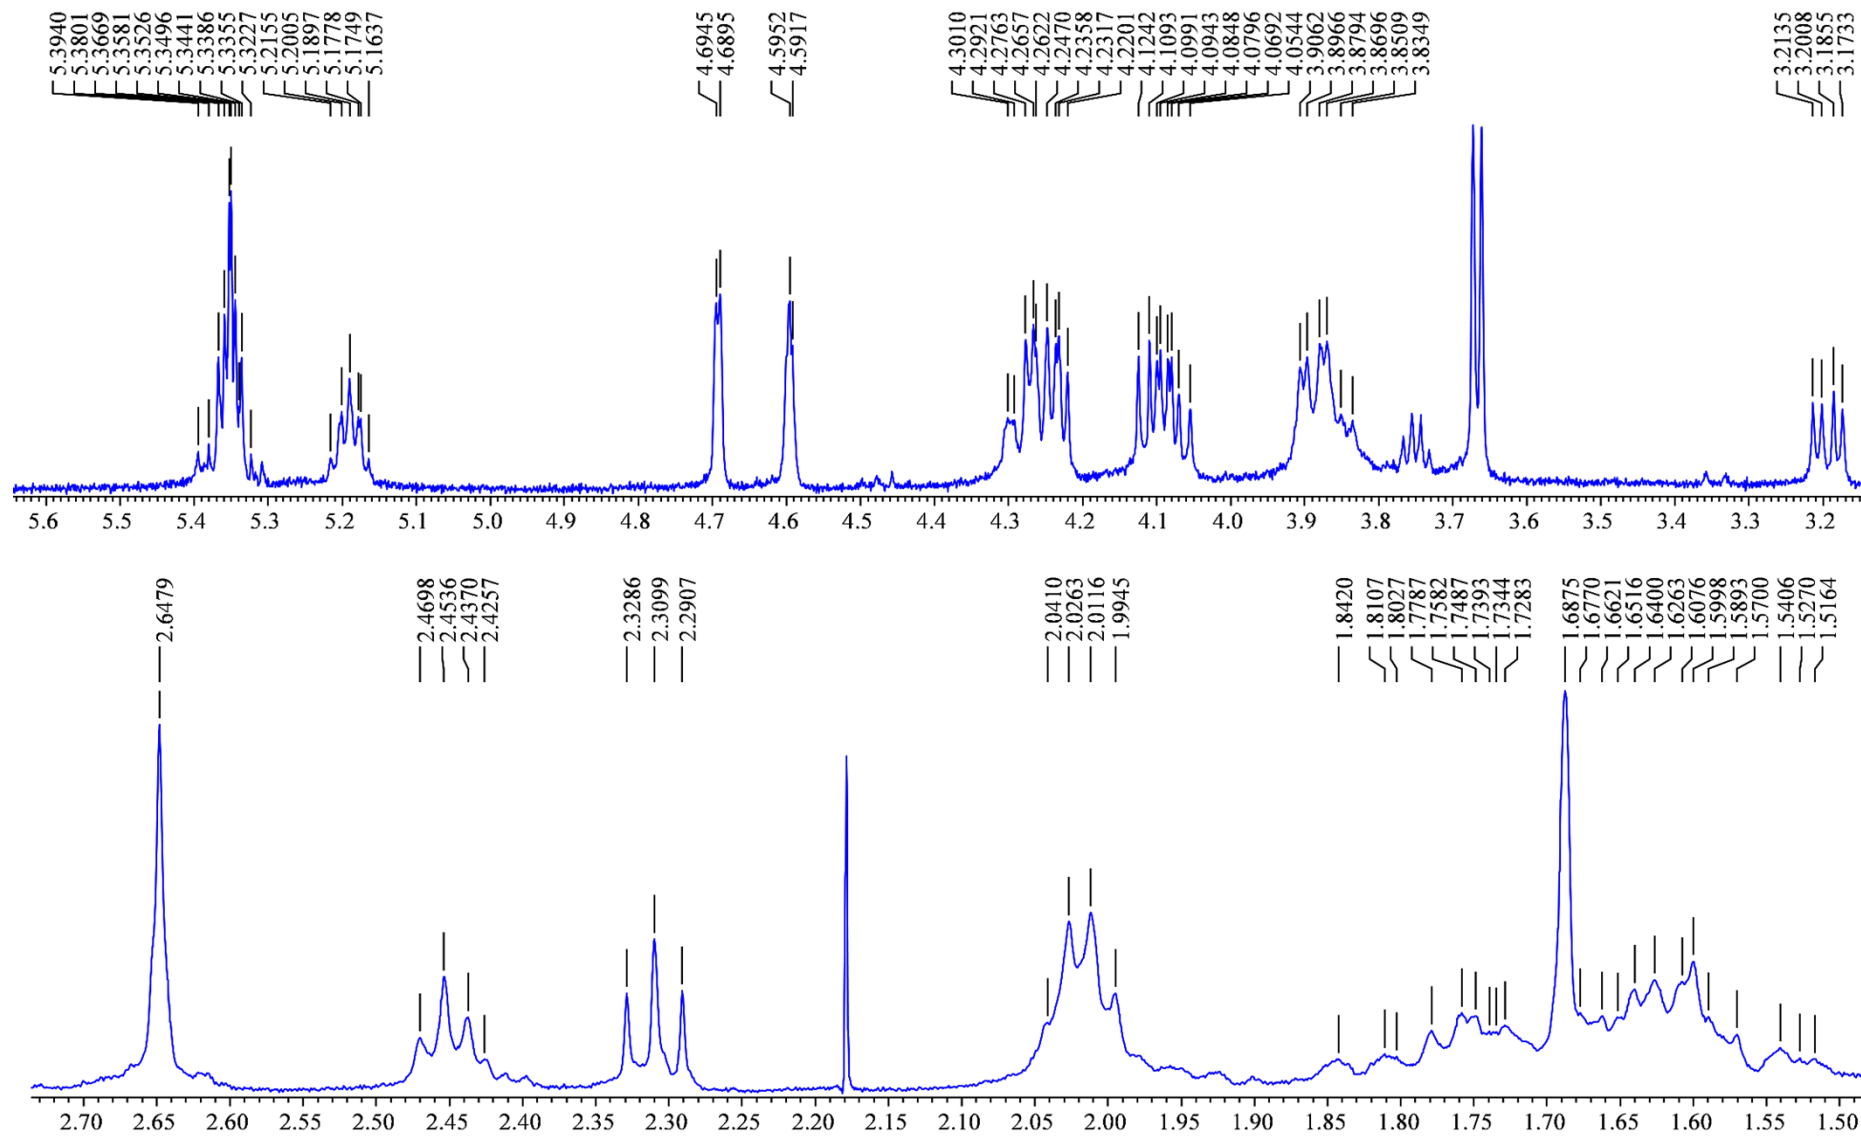

Figure S56. Fragments of  $^1\text{H}$  NMR spectrum (400 MHz,  $\text{CDCl}_3$ ) of compound **10**.

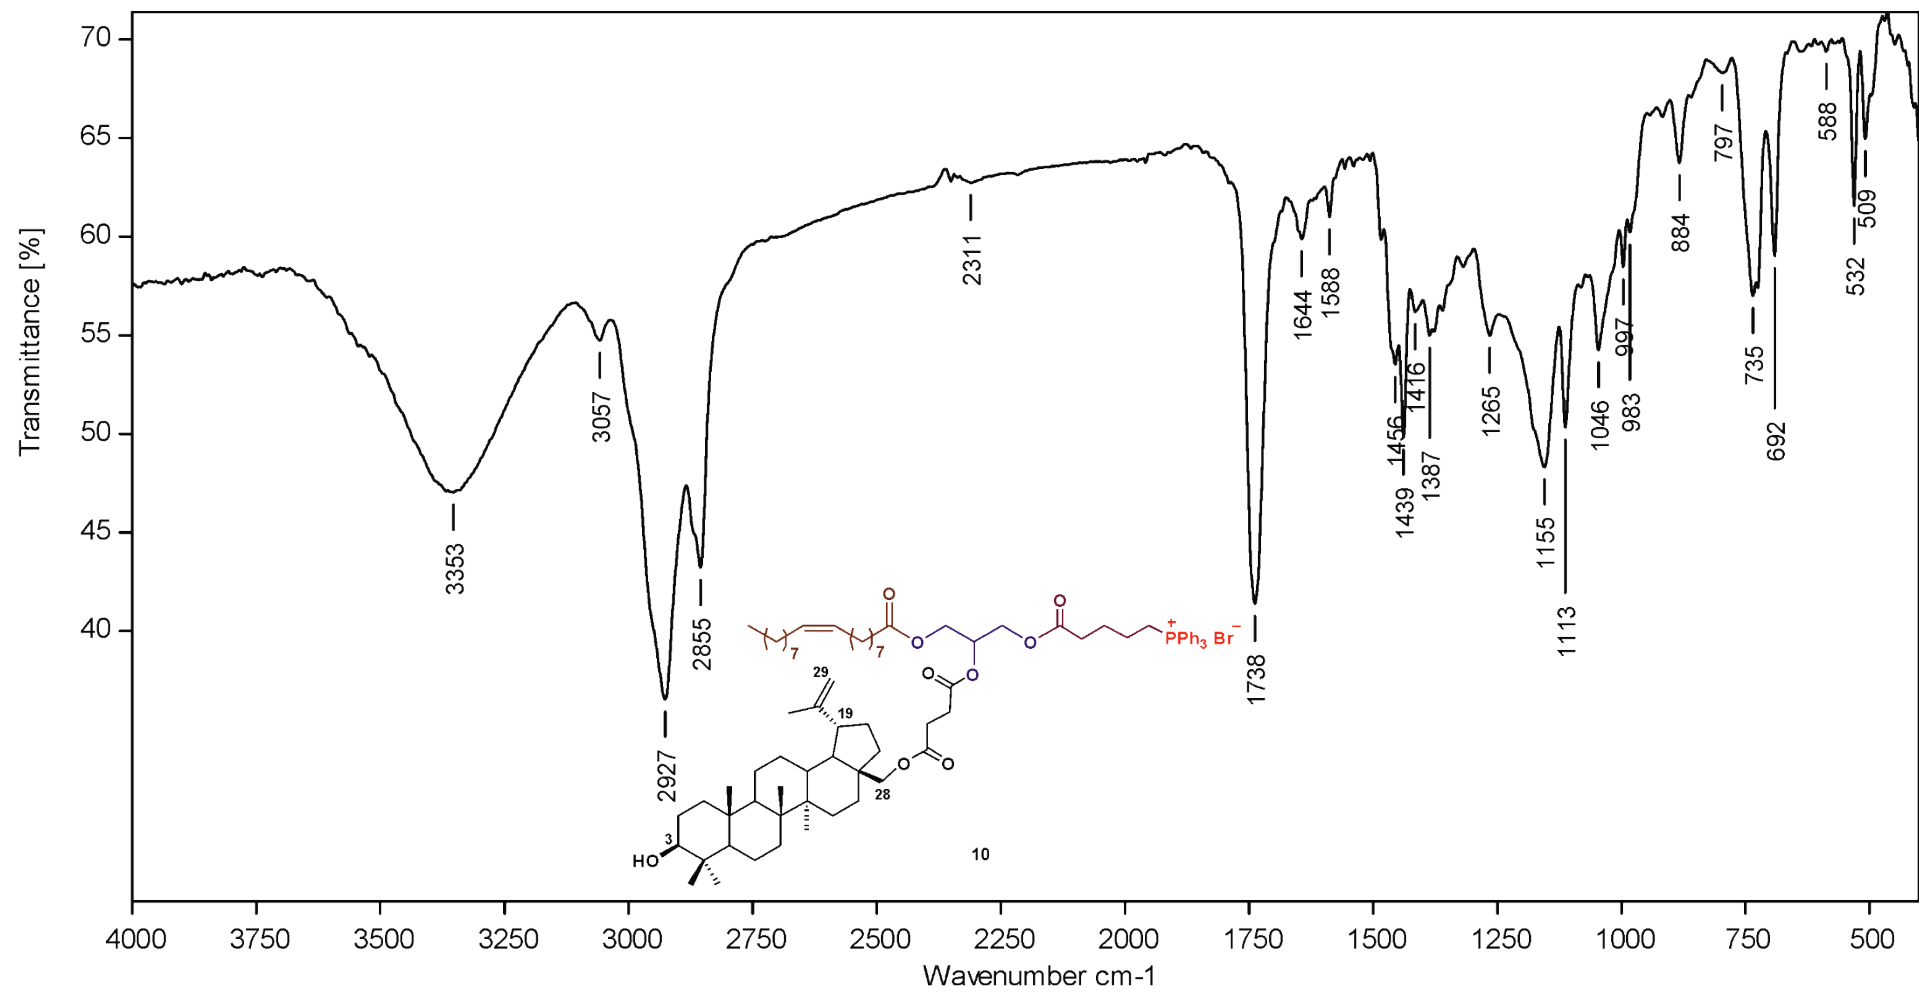

Figure S57. IR (KBr) spectrum of **10**.

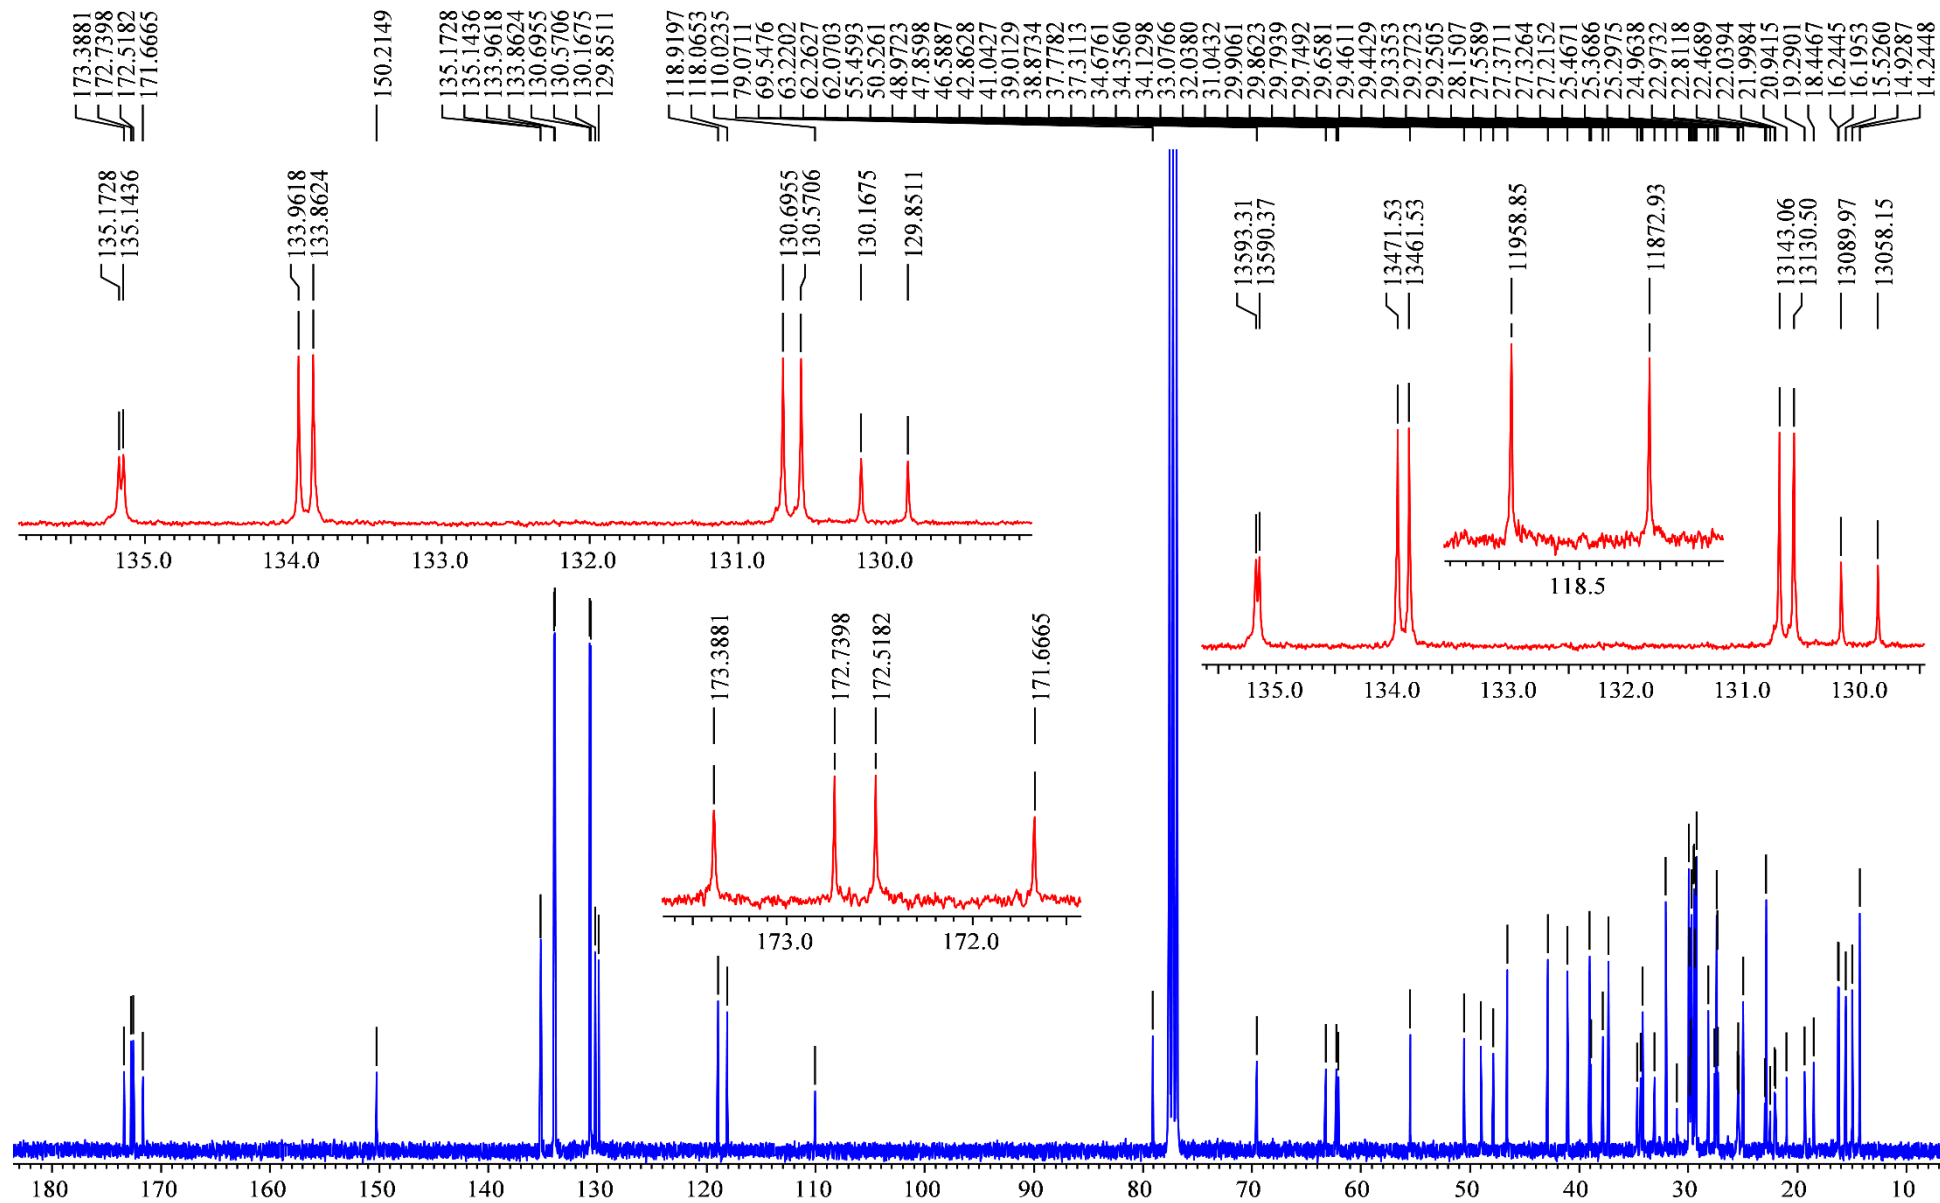

Figure S58.  $^{13}\text{C}$ - $\{^1\text{H}\}$  NMR spectrum (100.6 MHz,  $\text{CDCl}_3$ ) of compound **10**.

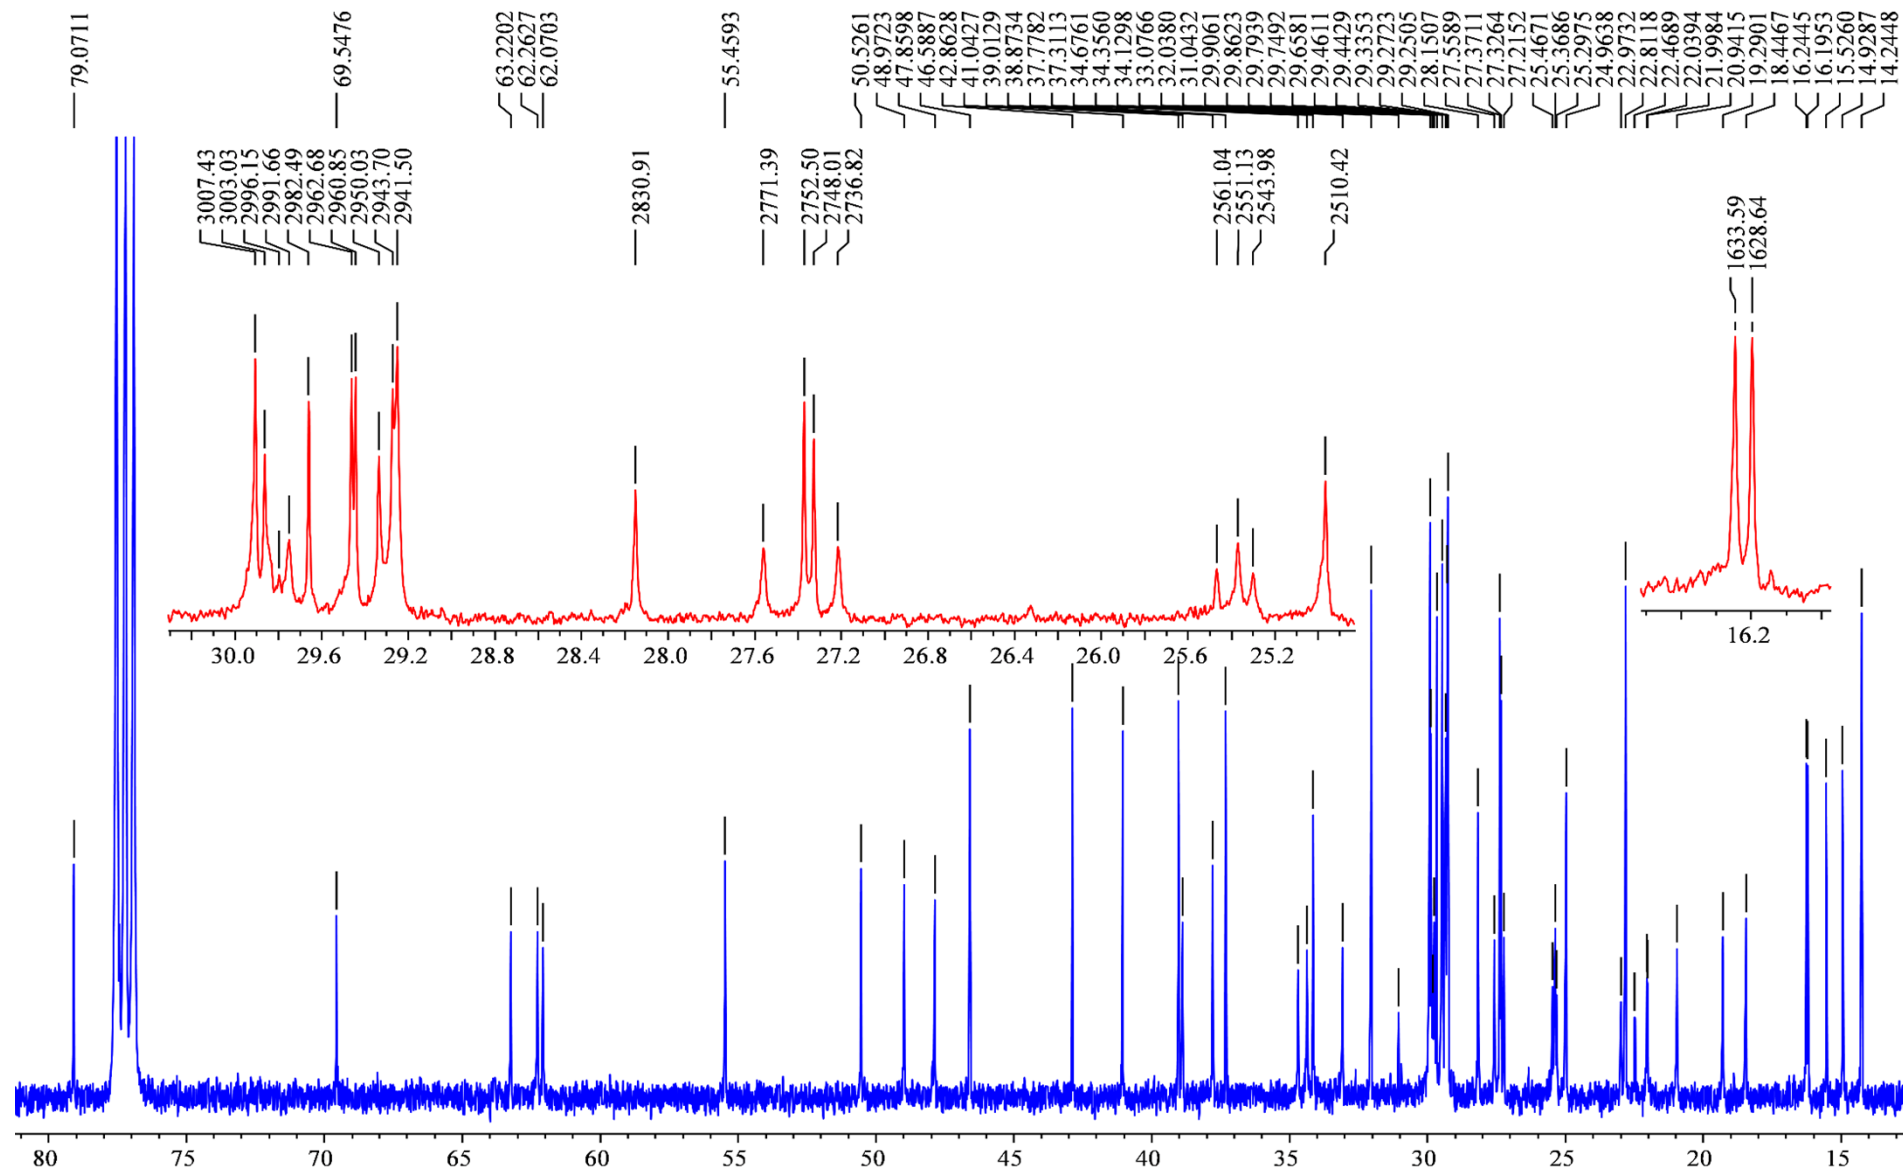

Figure S59. High-field region of  $^{13}\text{C}\{-^1\text{H}\}$  NMR spectrum (100.6 MHz,  $\text{CDCl}_3$ ) of compound **10**.

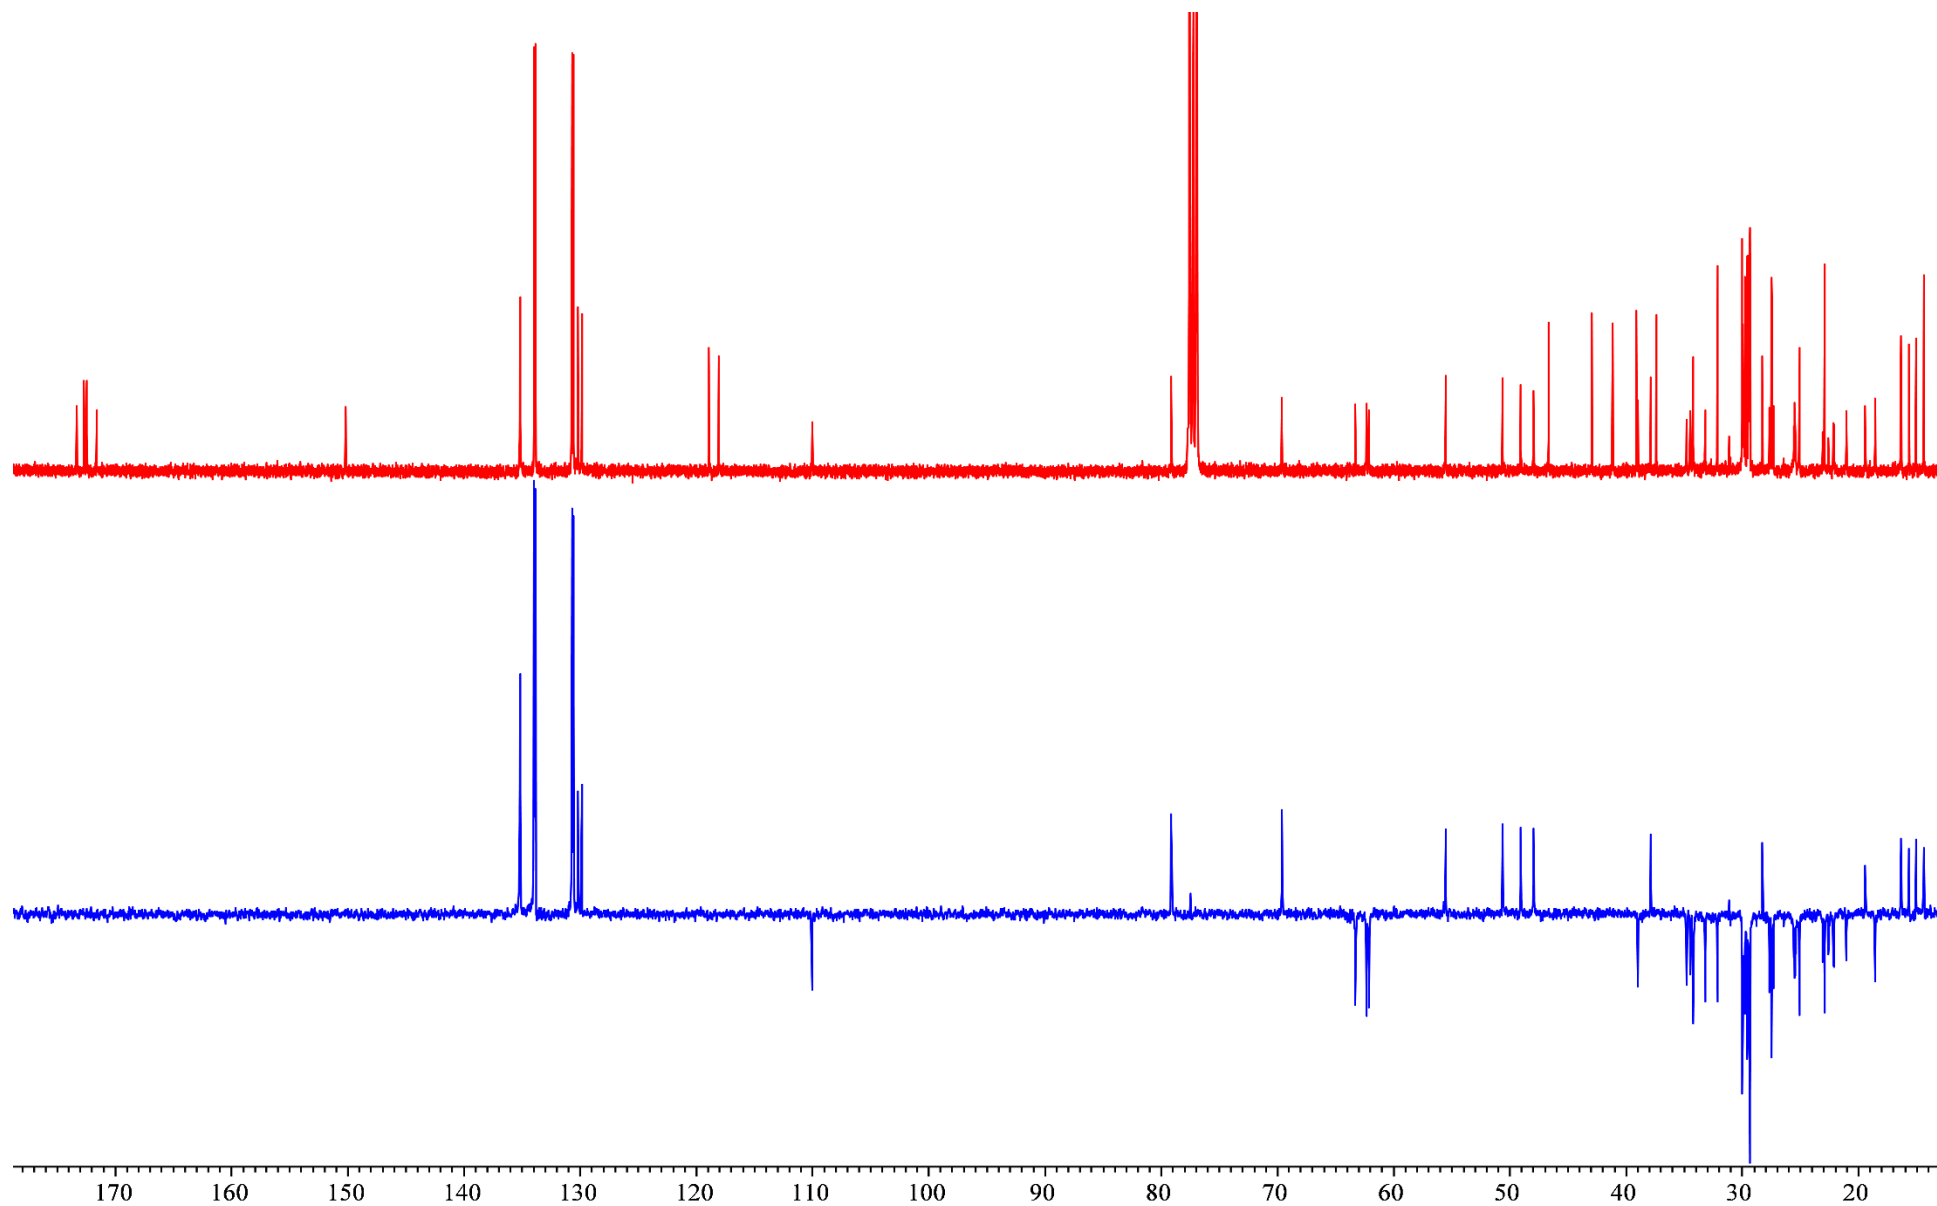

Figure S60.  $^{13}\text{C}$ - $\{^1\text{H}\}$  and  $^{13}\text{C}$ - $\{^1\text{H}\}$ -dept NMR spectra (100.6 MHz,  $\text{CDCl}_3$ ) of compound **10**.



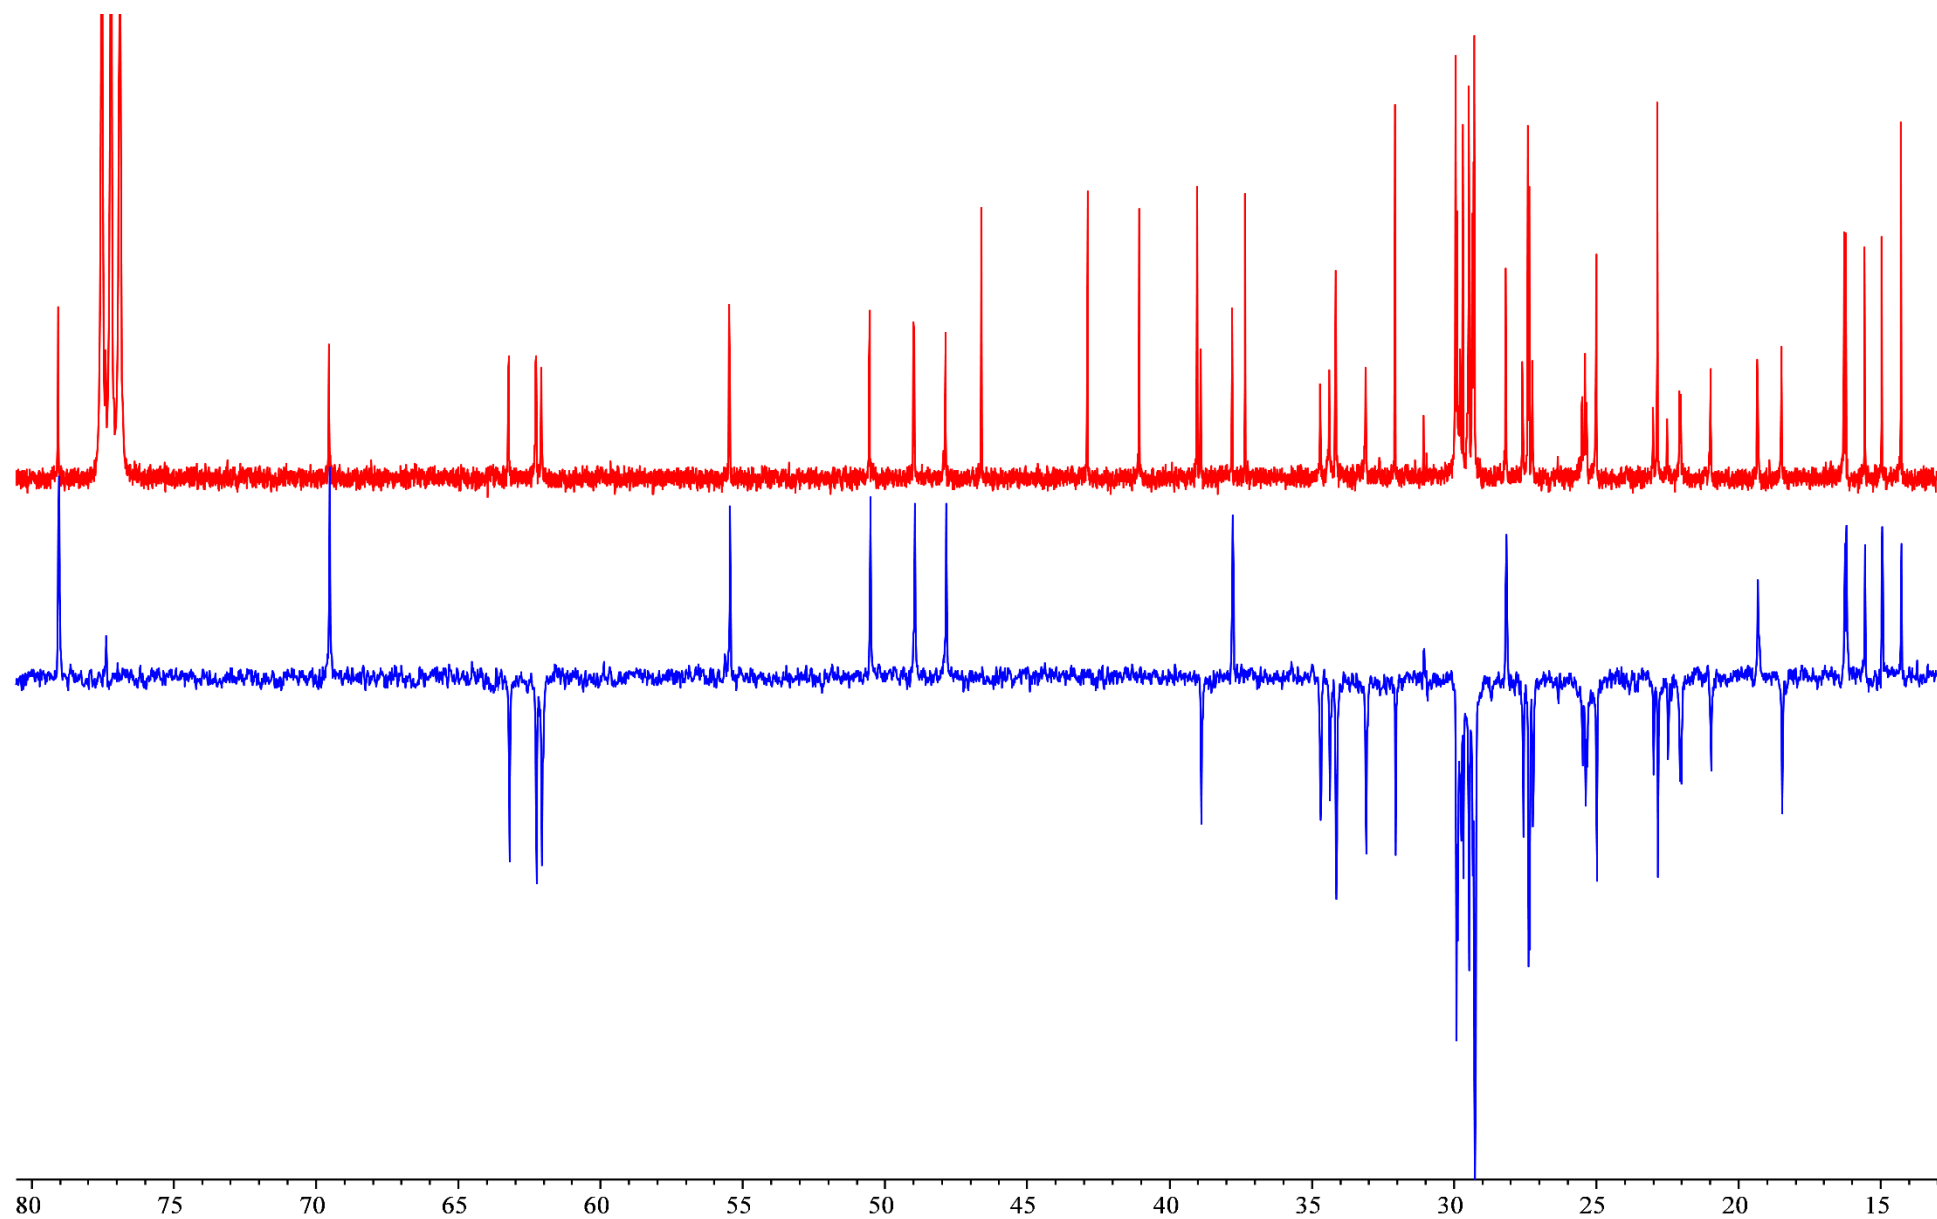

Figure S61. High-field region of  $^{13}\text{C}\{-^1\text{H}\}$  and  $^{13}\text{C}\{-^1\text{H}\}$ -dept NMR spectra (100.6 MHz,  $\text{CDCl}_3$ ) of compound **10**.

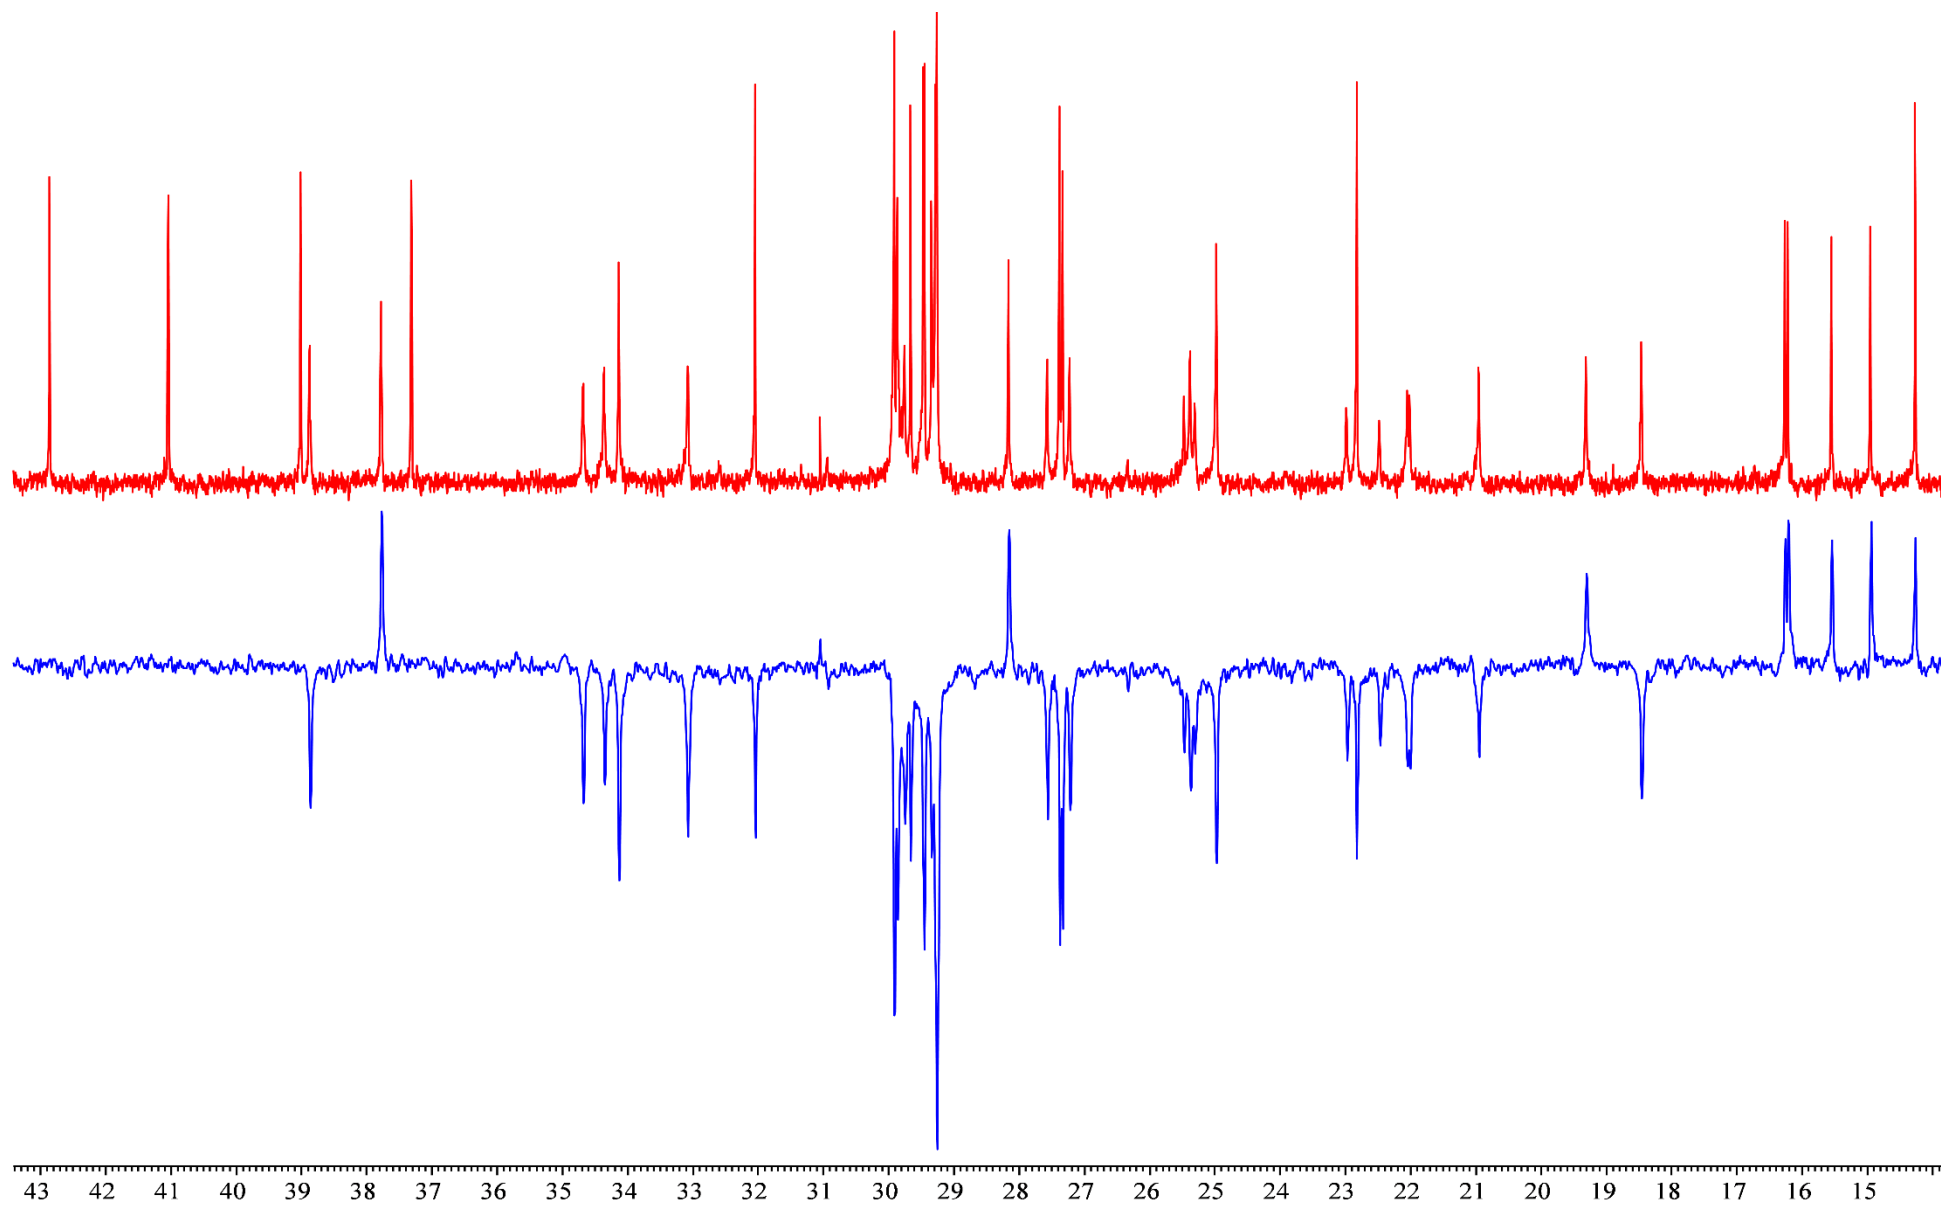

Figure S62. The 14-44 ppm region of  $^{13}\text{C}$ - $\{^1\text{H}\}$  and  $^{13}\text{C}$ - $\{^1\text{H}\}$ -dept NMR spectra (100.6 MHz,  $\text{CDCl}_3$ ) of compound **10**.

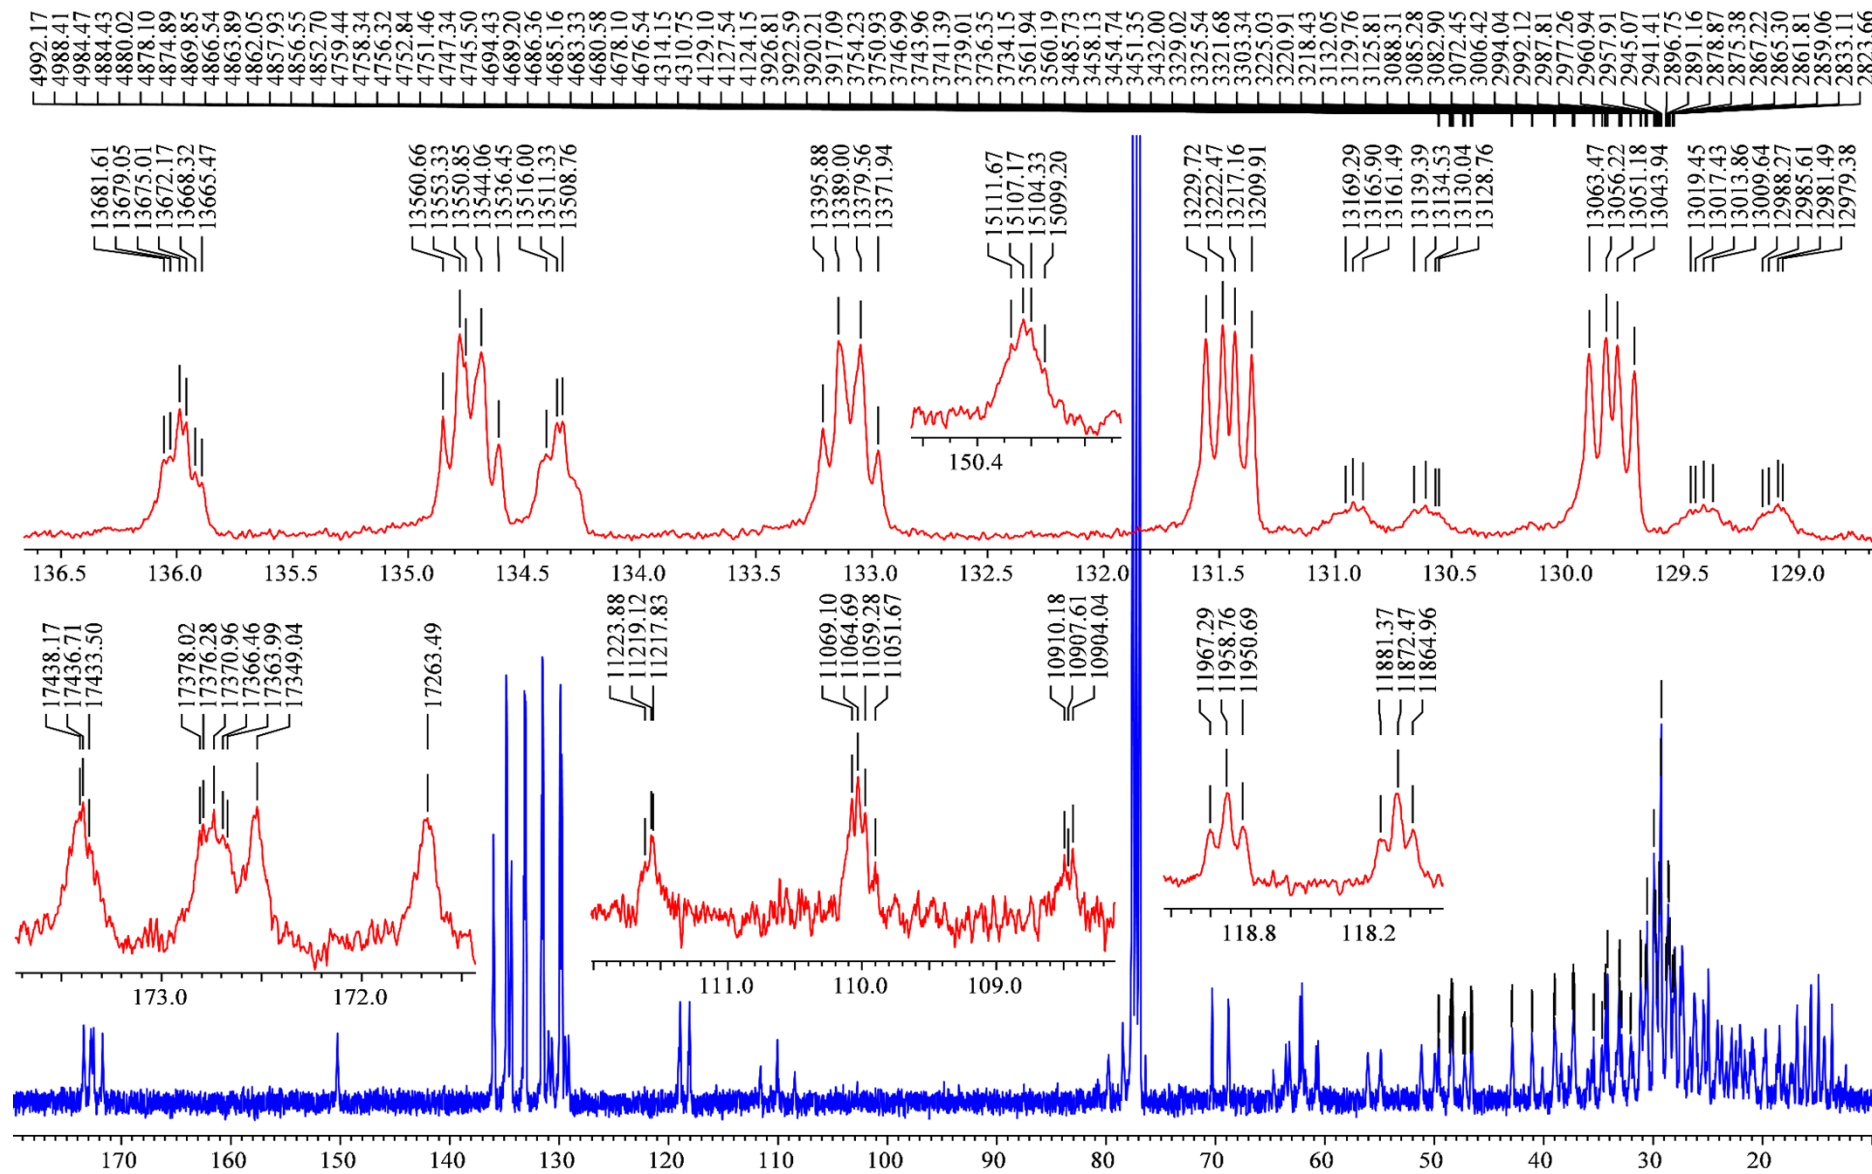

Figure S63. <sup>13</sup>C NMR spectrum (100.6 MHz, CDCl<sub>3</sub>) of compound 10.

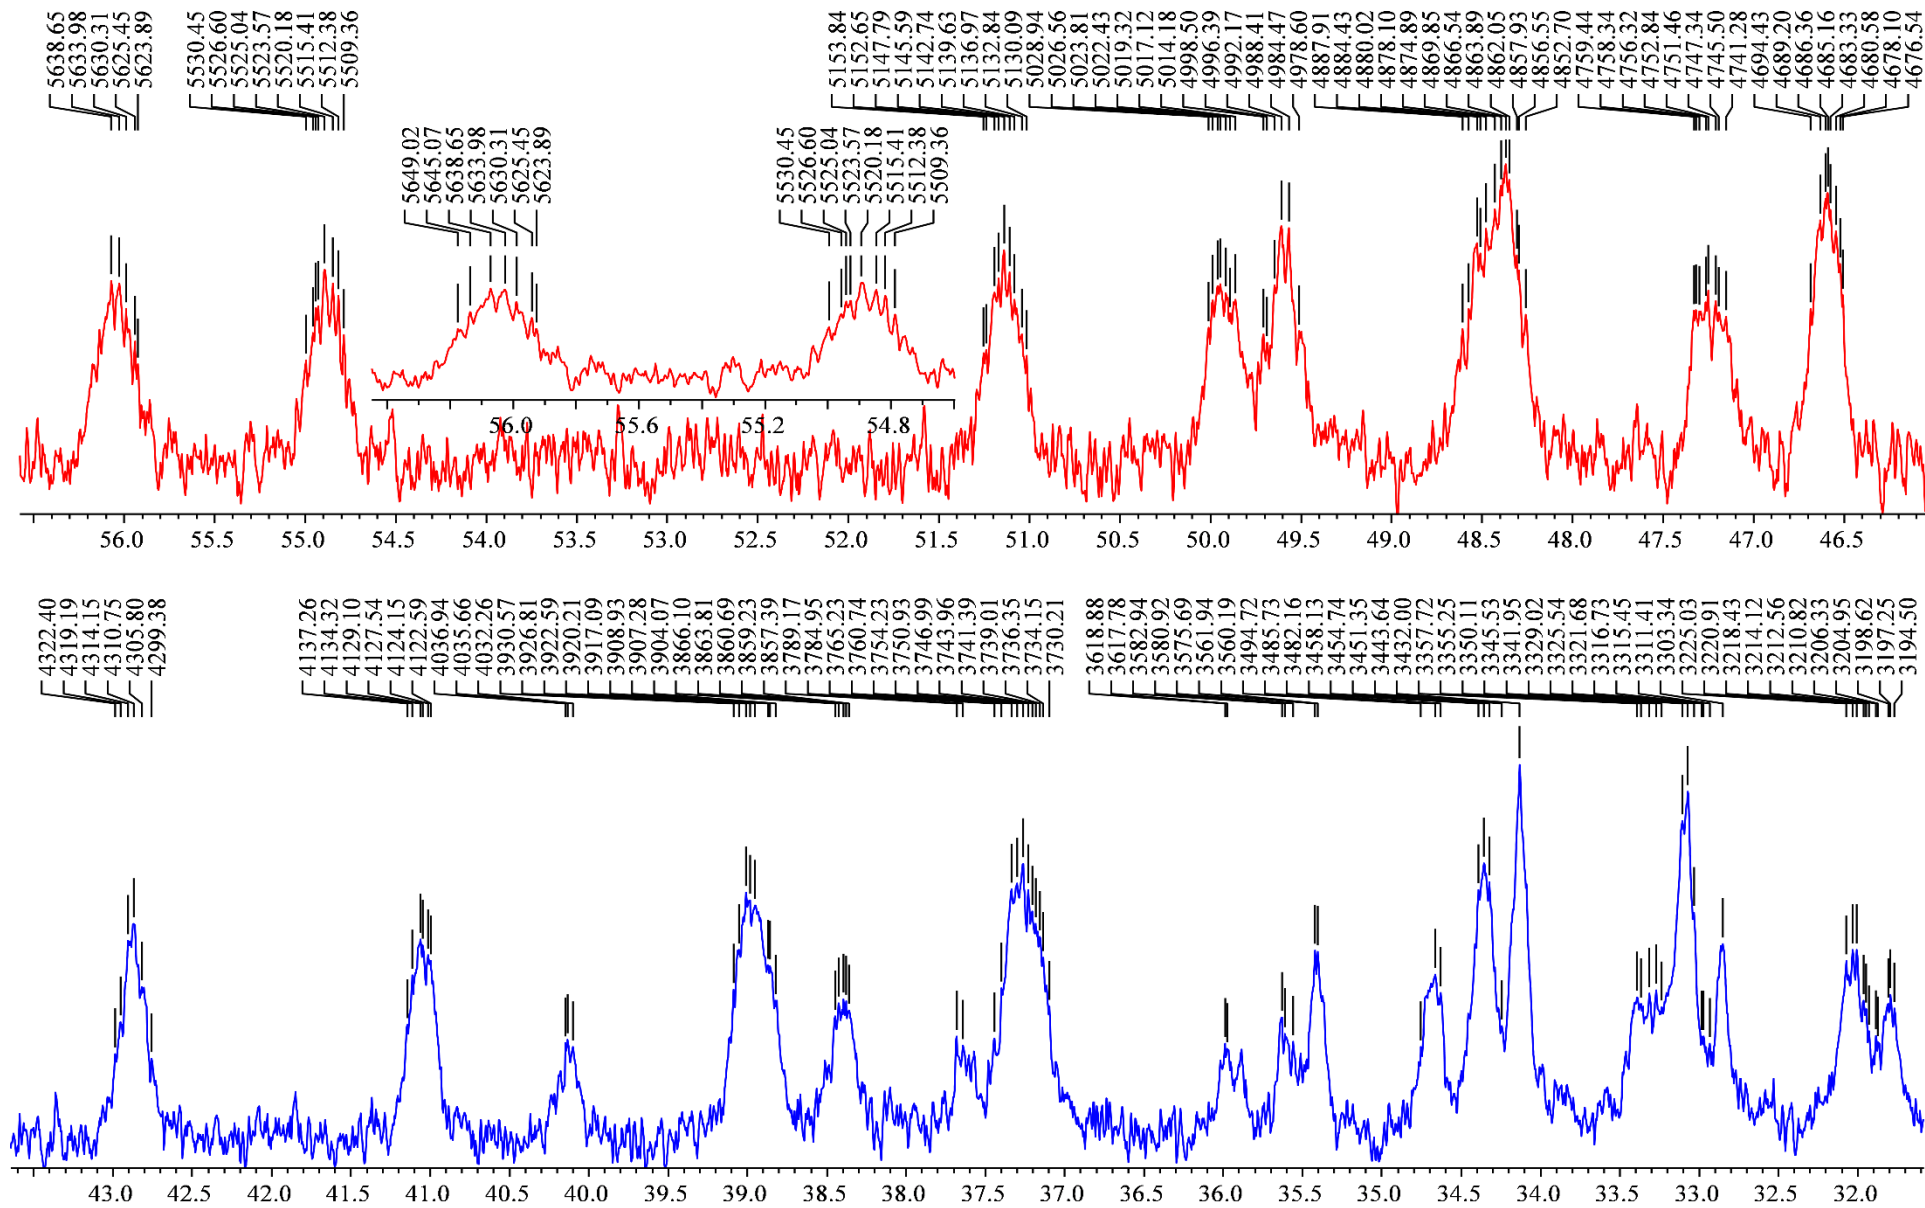

Figure S64. The 46-57 and 31-44 ppm regions of  $^{13}\text{C}$  NMR spectrum (100.6 MHz,  $\text{CDCl}_3$ ) of compound **10**.

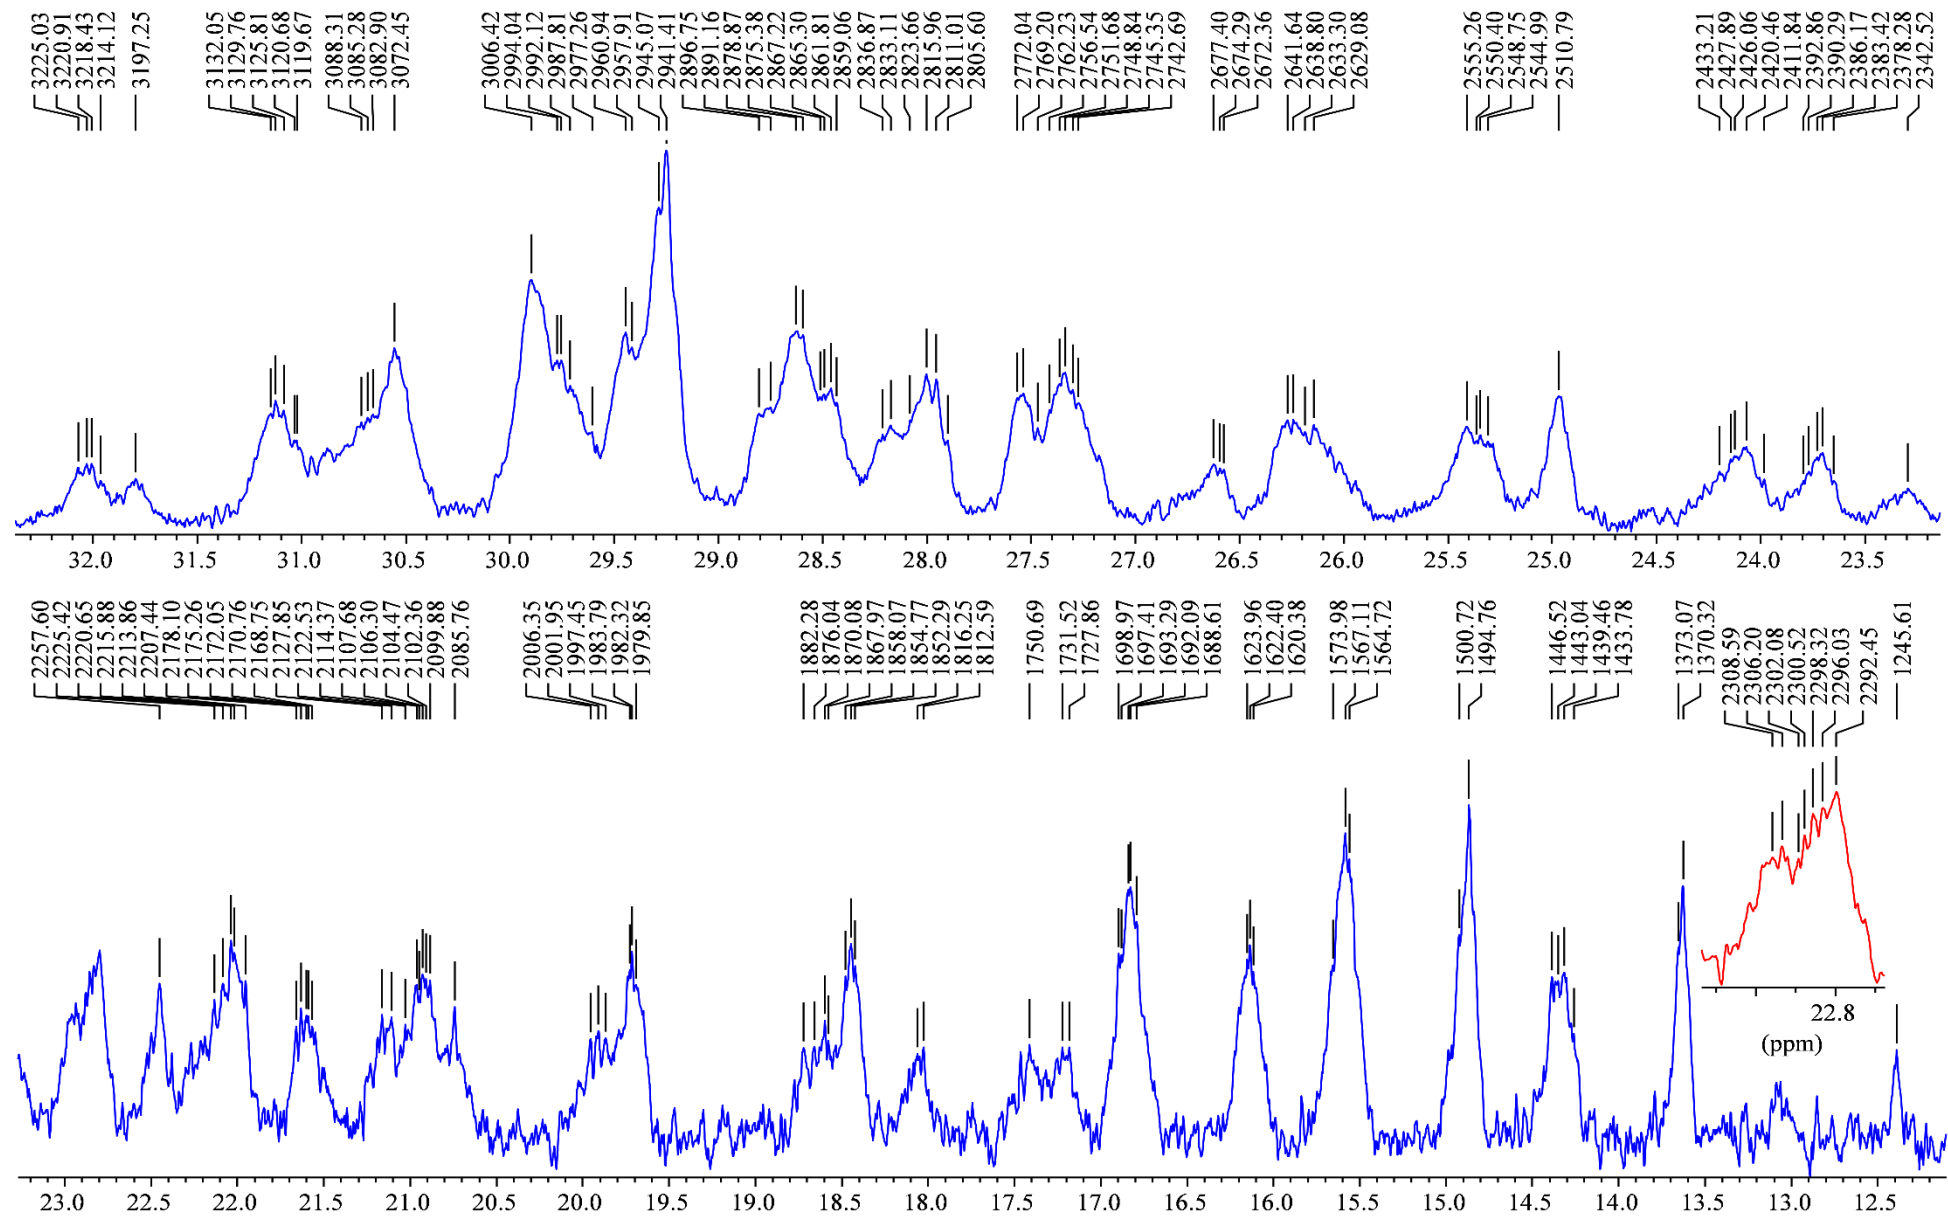

Figure S65. The 12-32 ppm region of  $^{13}\text{C}$  NMR spectrum (100.6 MHz,  $\text{CDCl}_3$ ) of compound **10**.

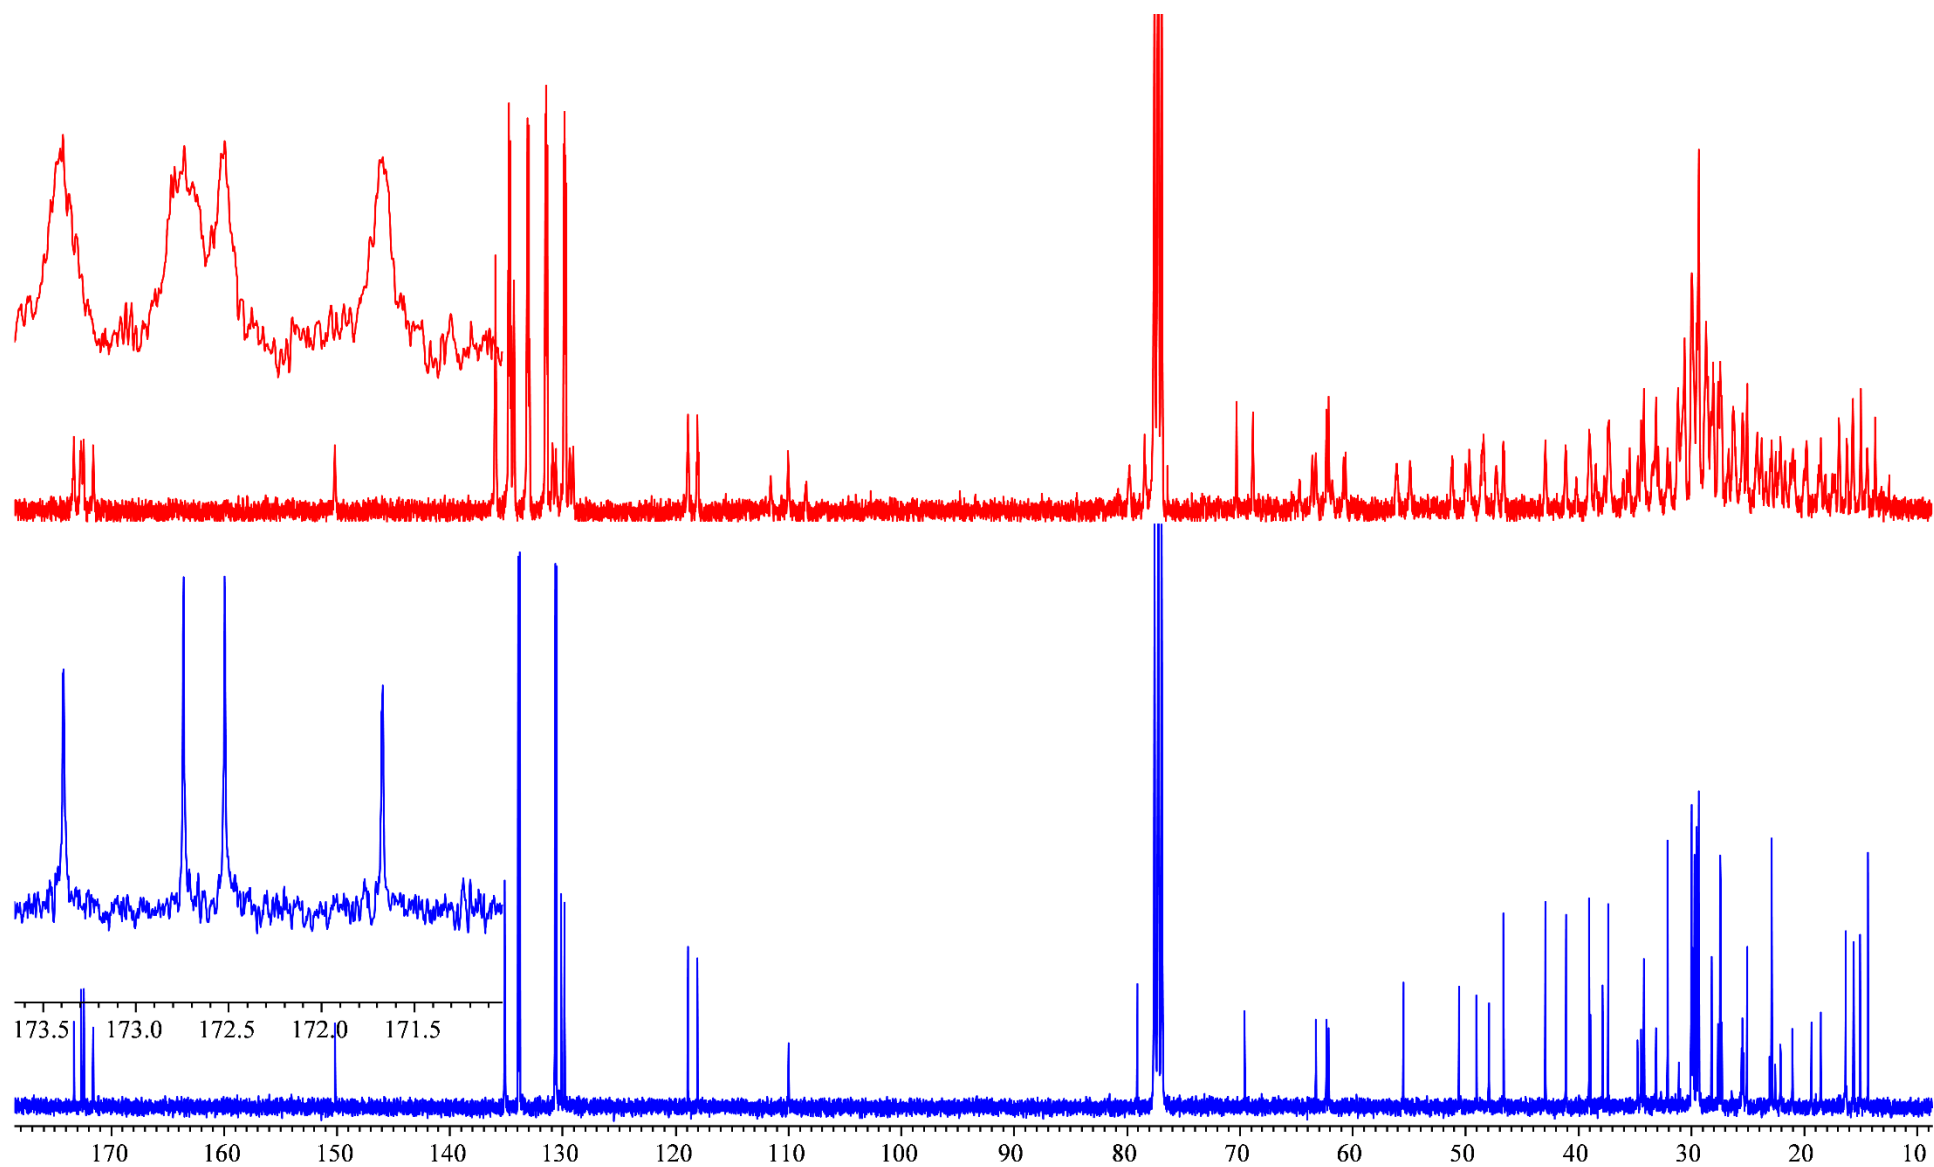

Figure S66.  $^{13}\text{C}\{-^1\text{H}\}$  and  $^{13}\text{C}$  NMR spectra (100.6 MHz,  $\text{CDCl}_3$ ) of compound **10**.

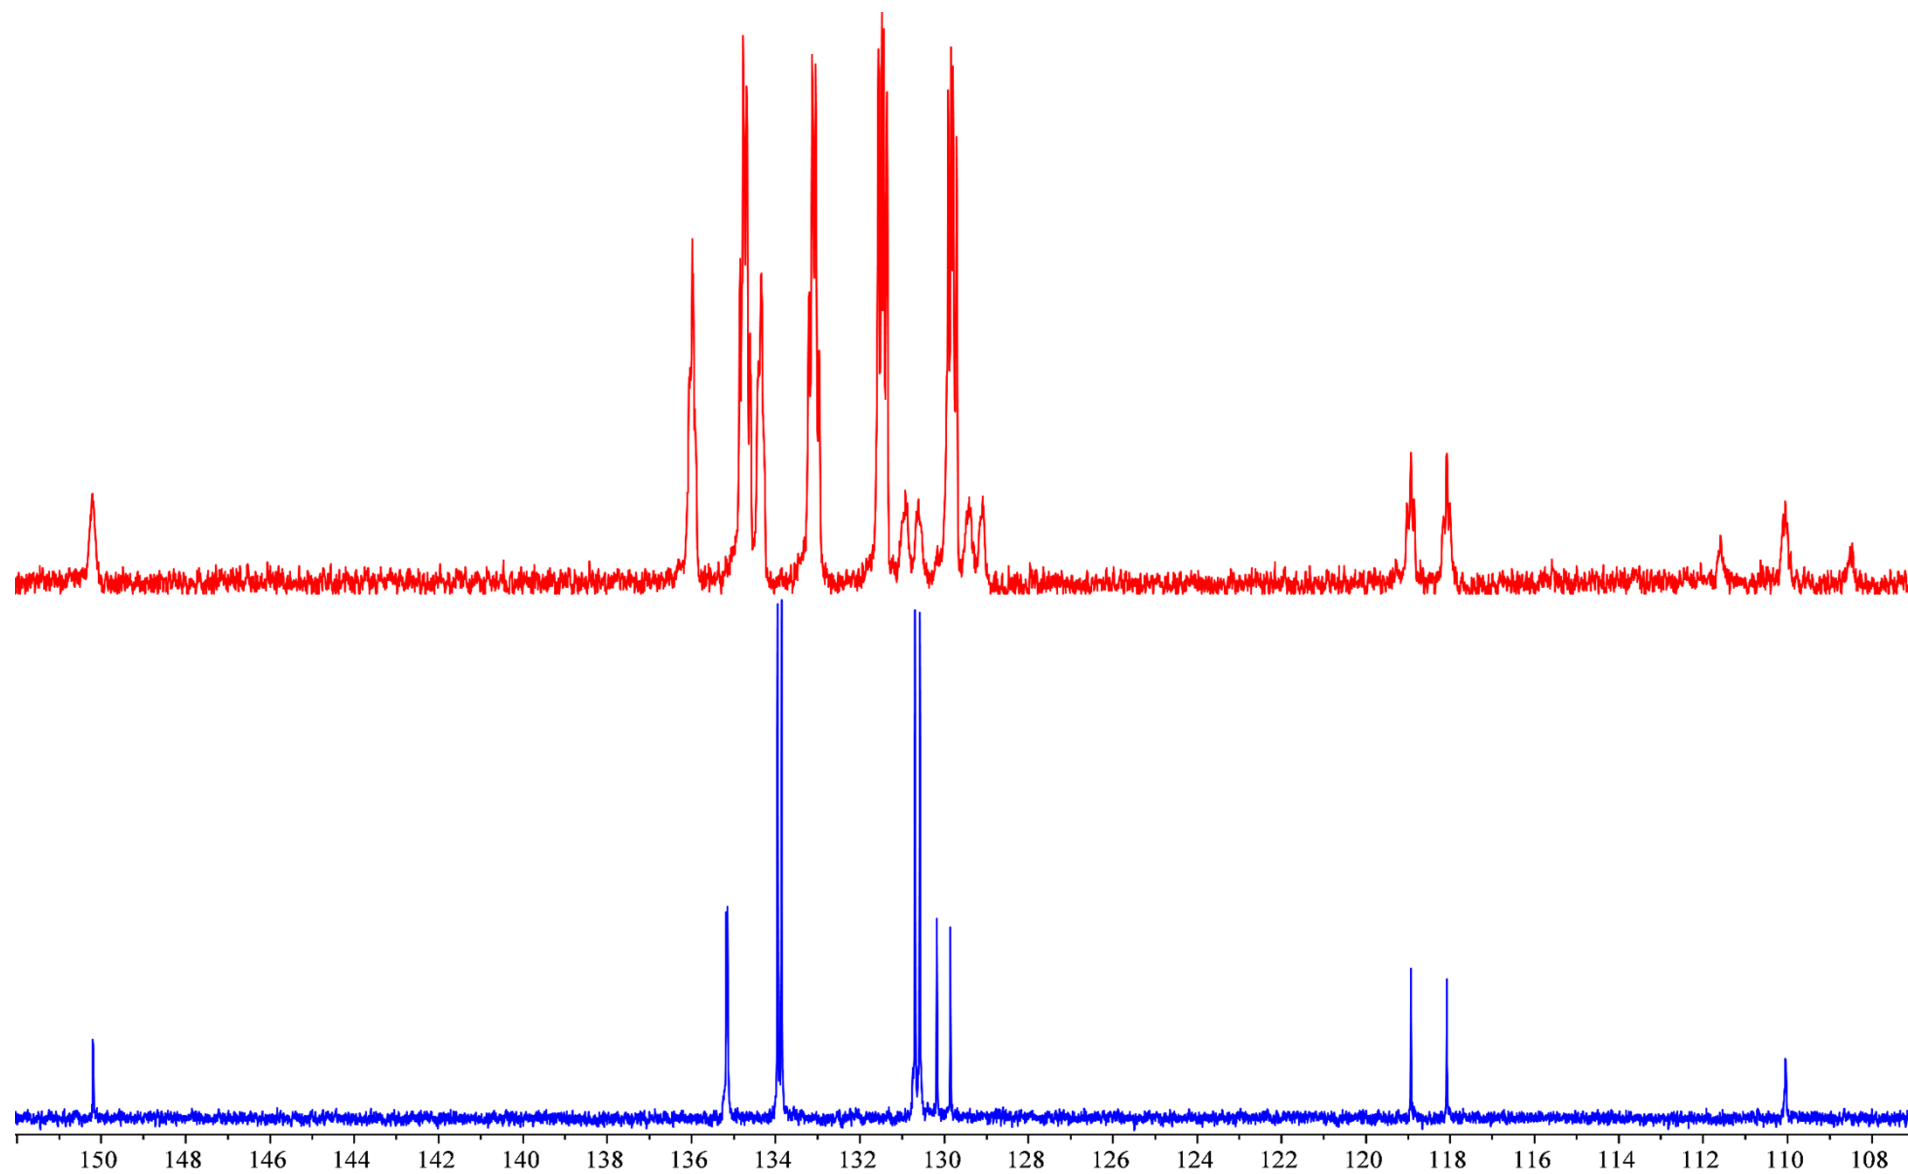

Figure S67. Down-field region of  $^{13}\text{C}\{-^1\text{H}\}$  and  $^{13}\text{C}$  NMR spectra (100.6 MHz,  $\text{CDCl}_3$ ) of compound **10**.

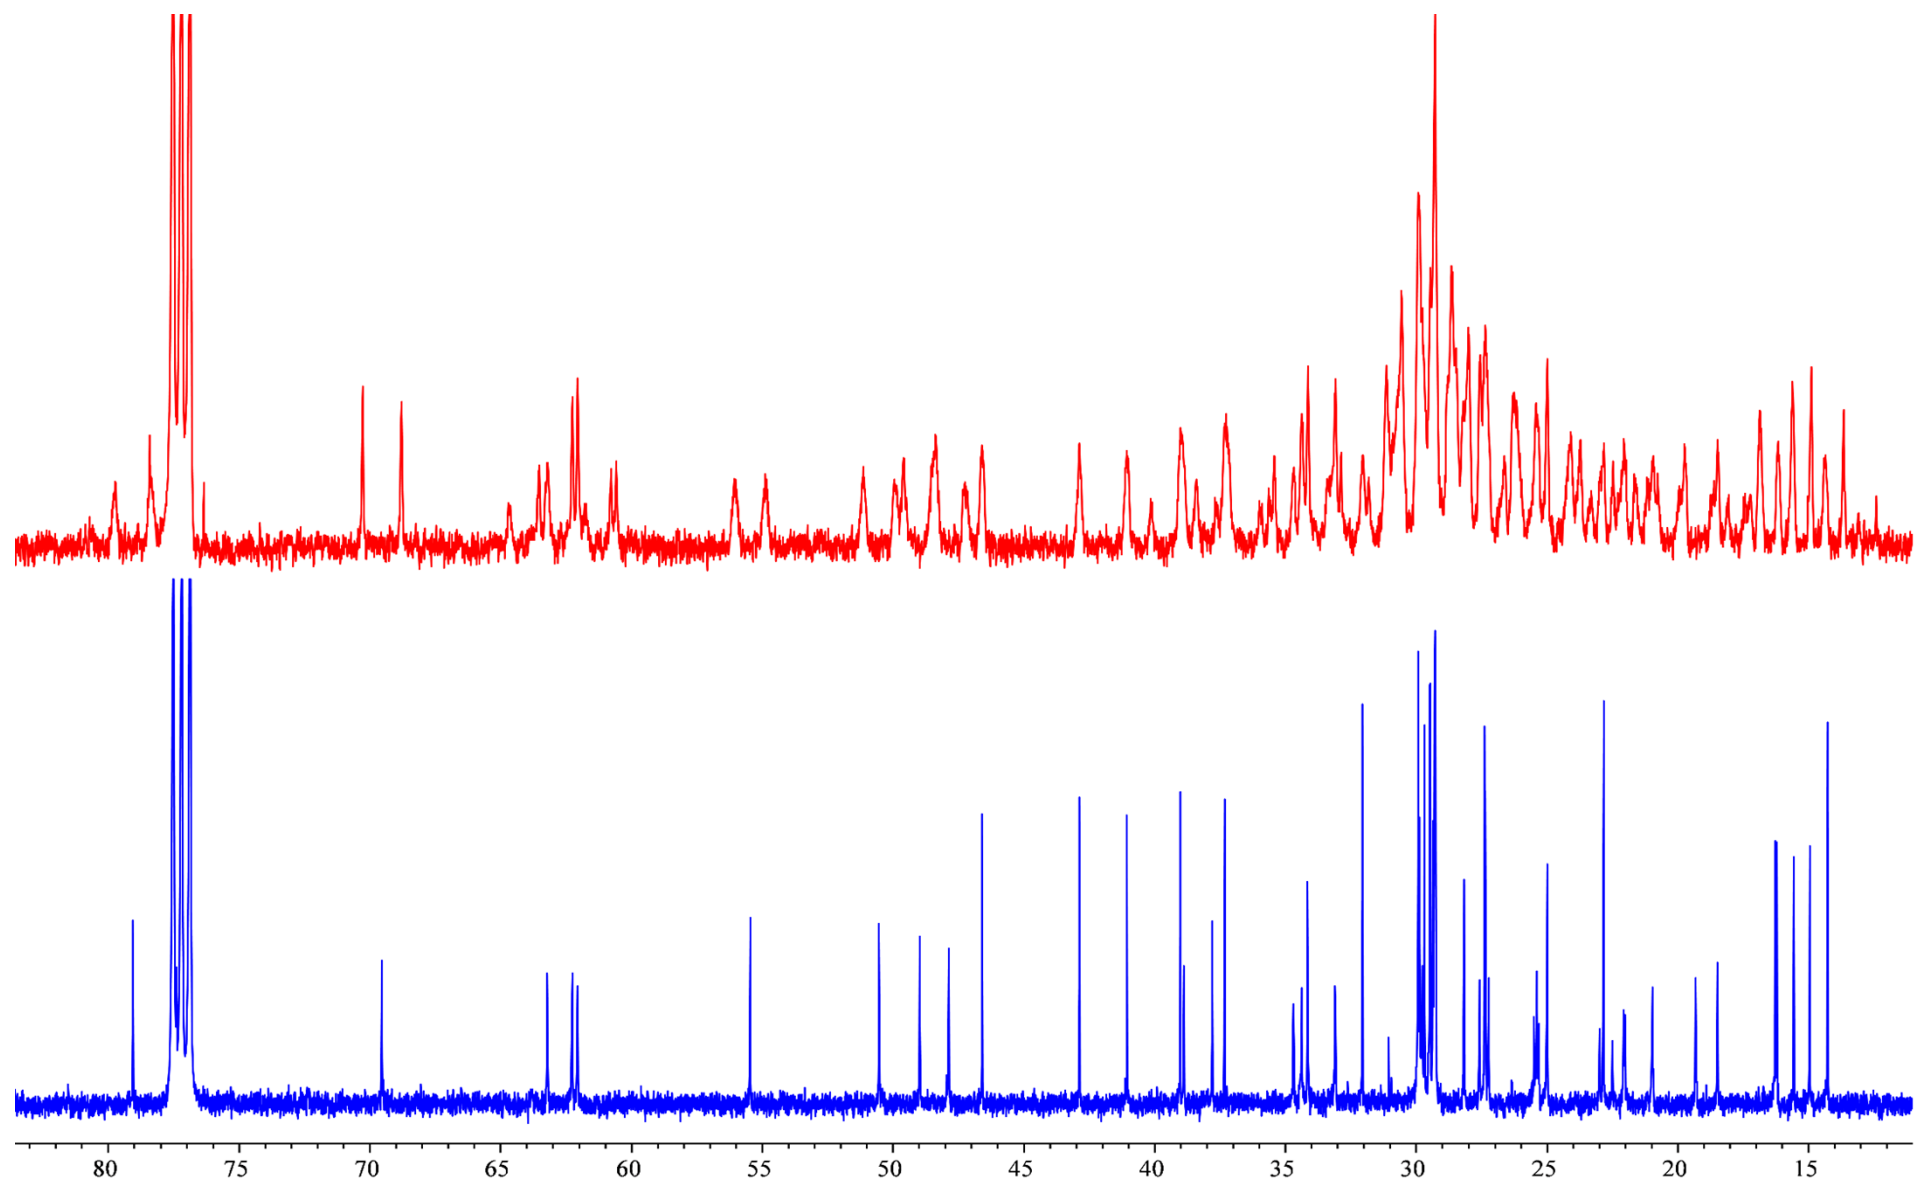

Figure S68. High-field region of  $^{13}\text{C}\{-^1\text{H}\}$  and  $^{13}\text{C}$  NMR spectra (100.6 MHz,  $\text{CDCl}_3$ ) of compound **10**.



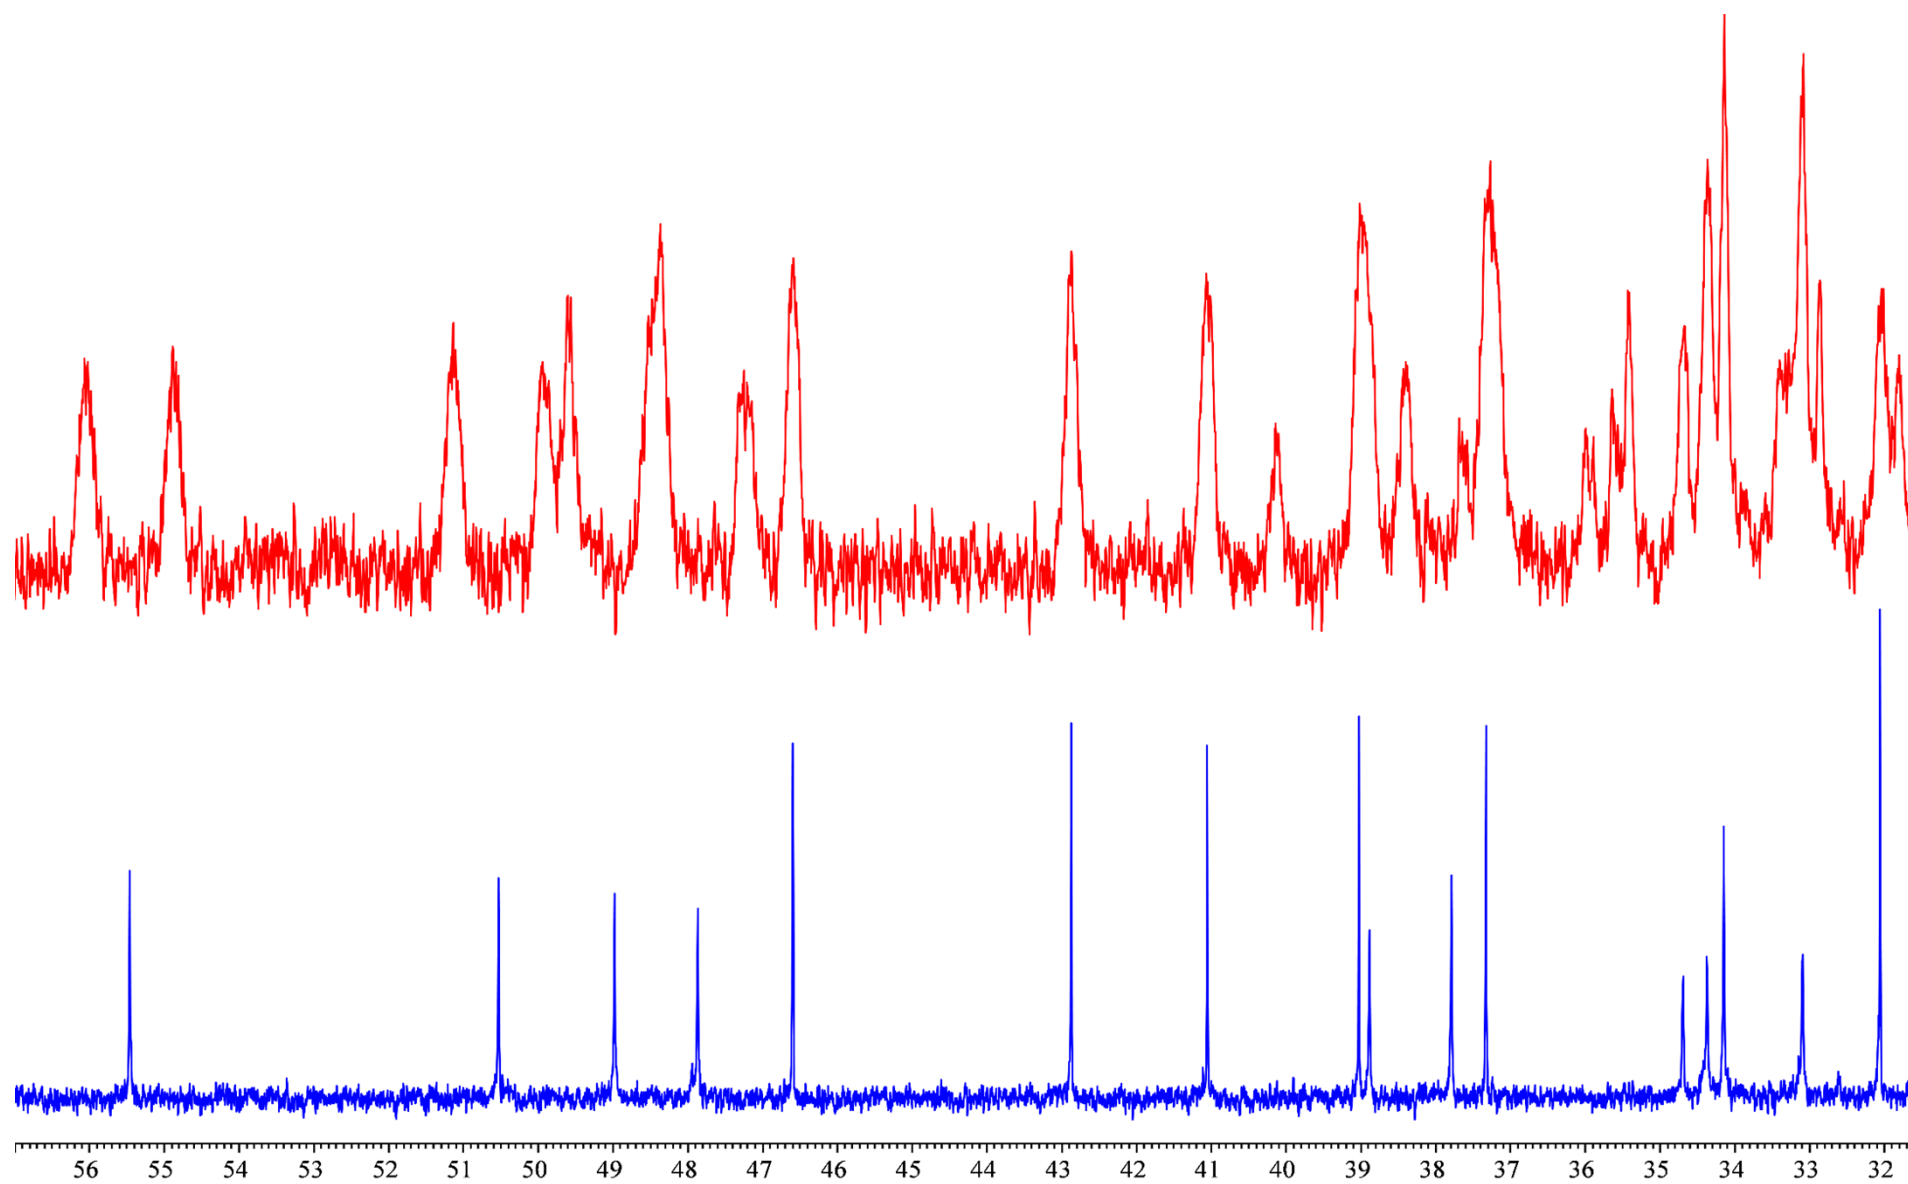

Figure S69. The 32-57 ppm region of  $^{13}\text{C}\{-^1\text{H}\}$  and  $^{13}\text{C}$  NMR spectra (100.6 MHz,  $\text{CDCl}_3$ ) of compound **10**.

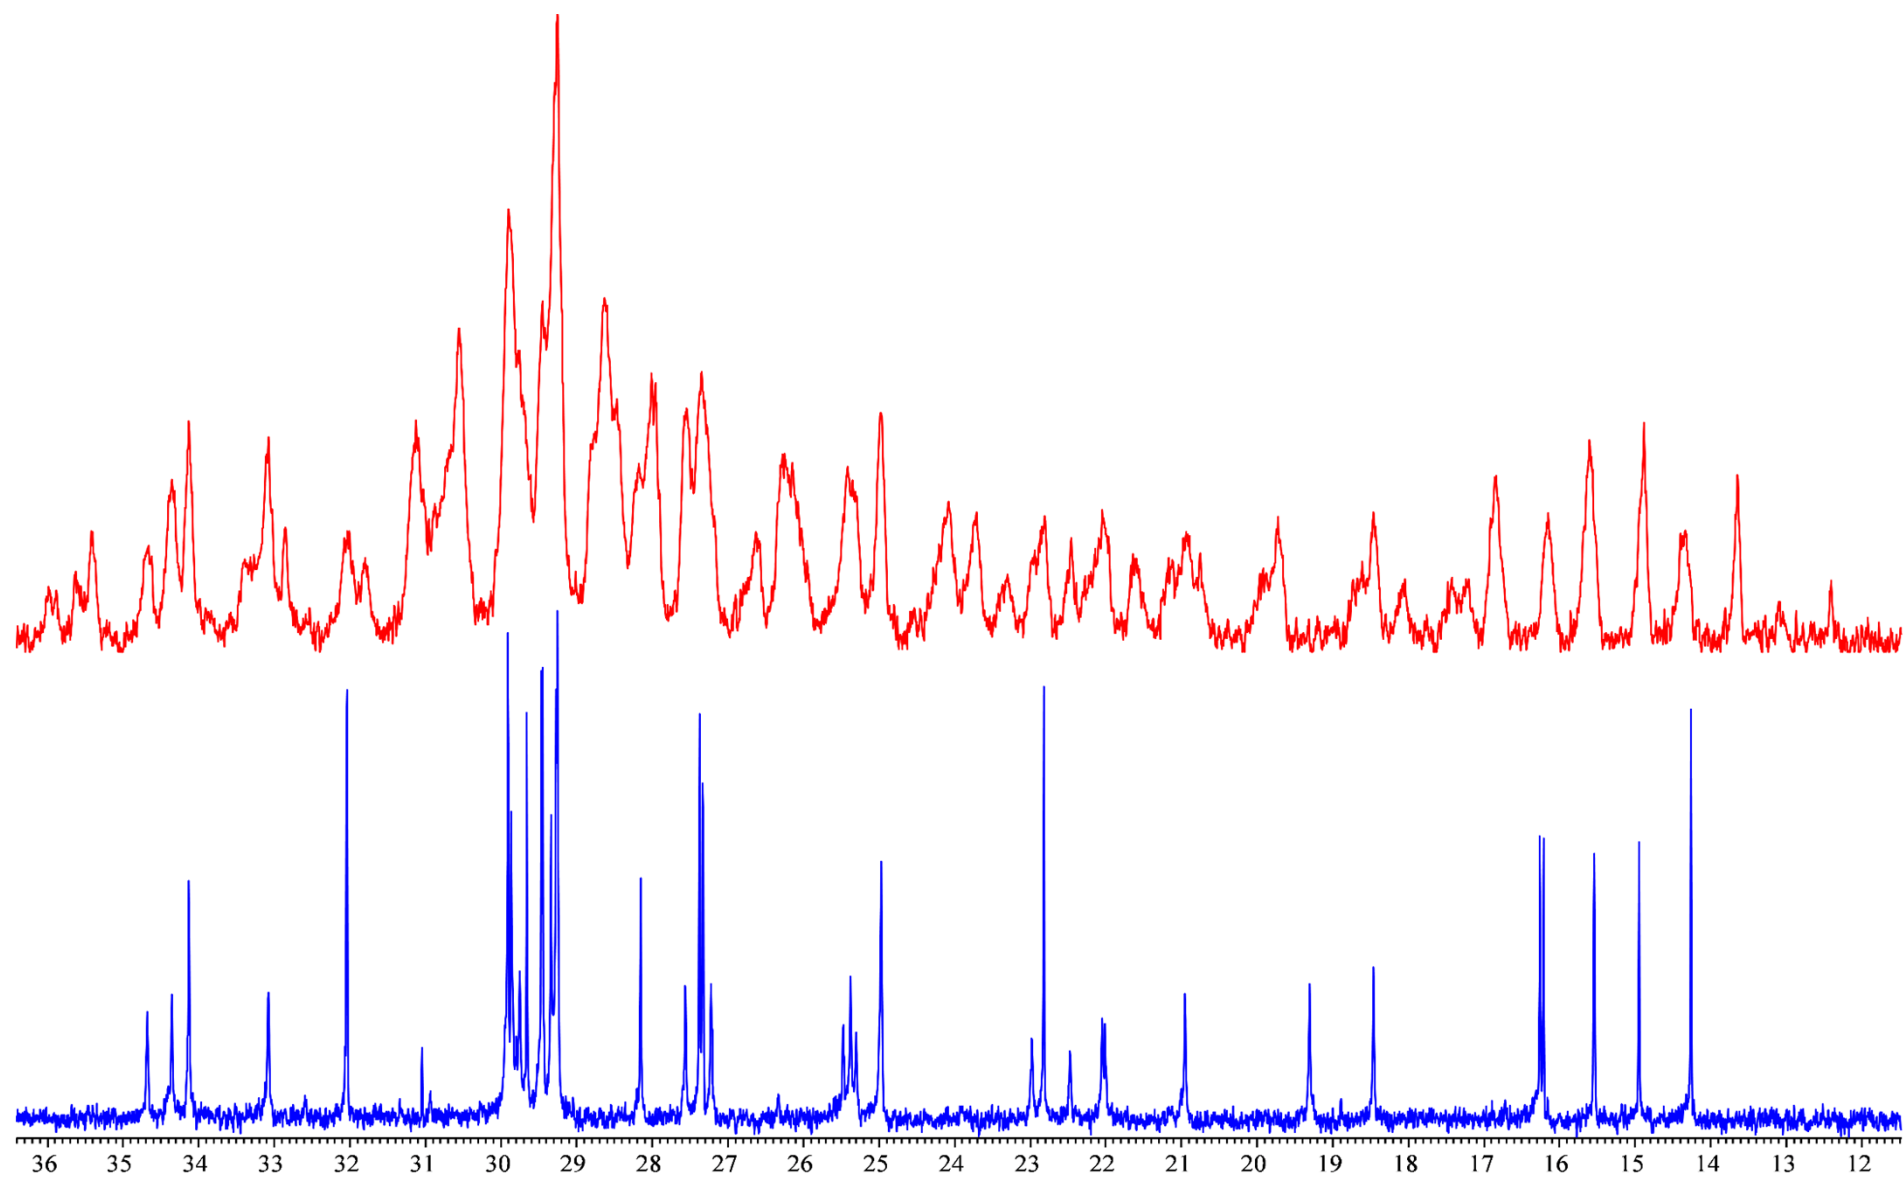

Figure S70. The 12-36 ppm region of  $^{13}\text{C}\{-^1\text{H}\}$  and  $^{13}\text{C}$  NMR spectra (100.6 MHz,  $\text{CDCl}_3$ ) of compound **10**.

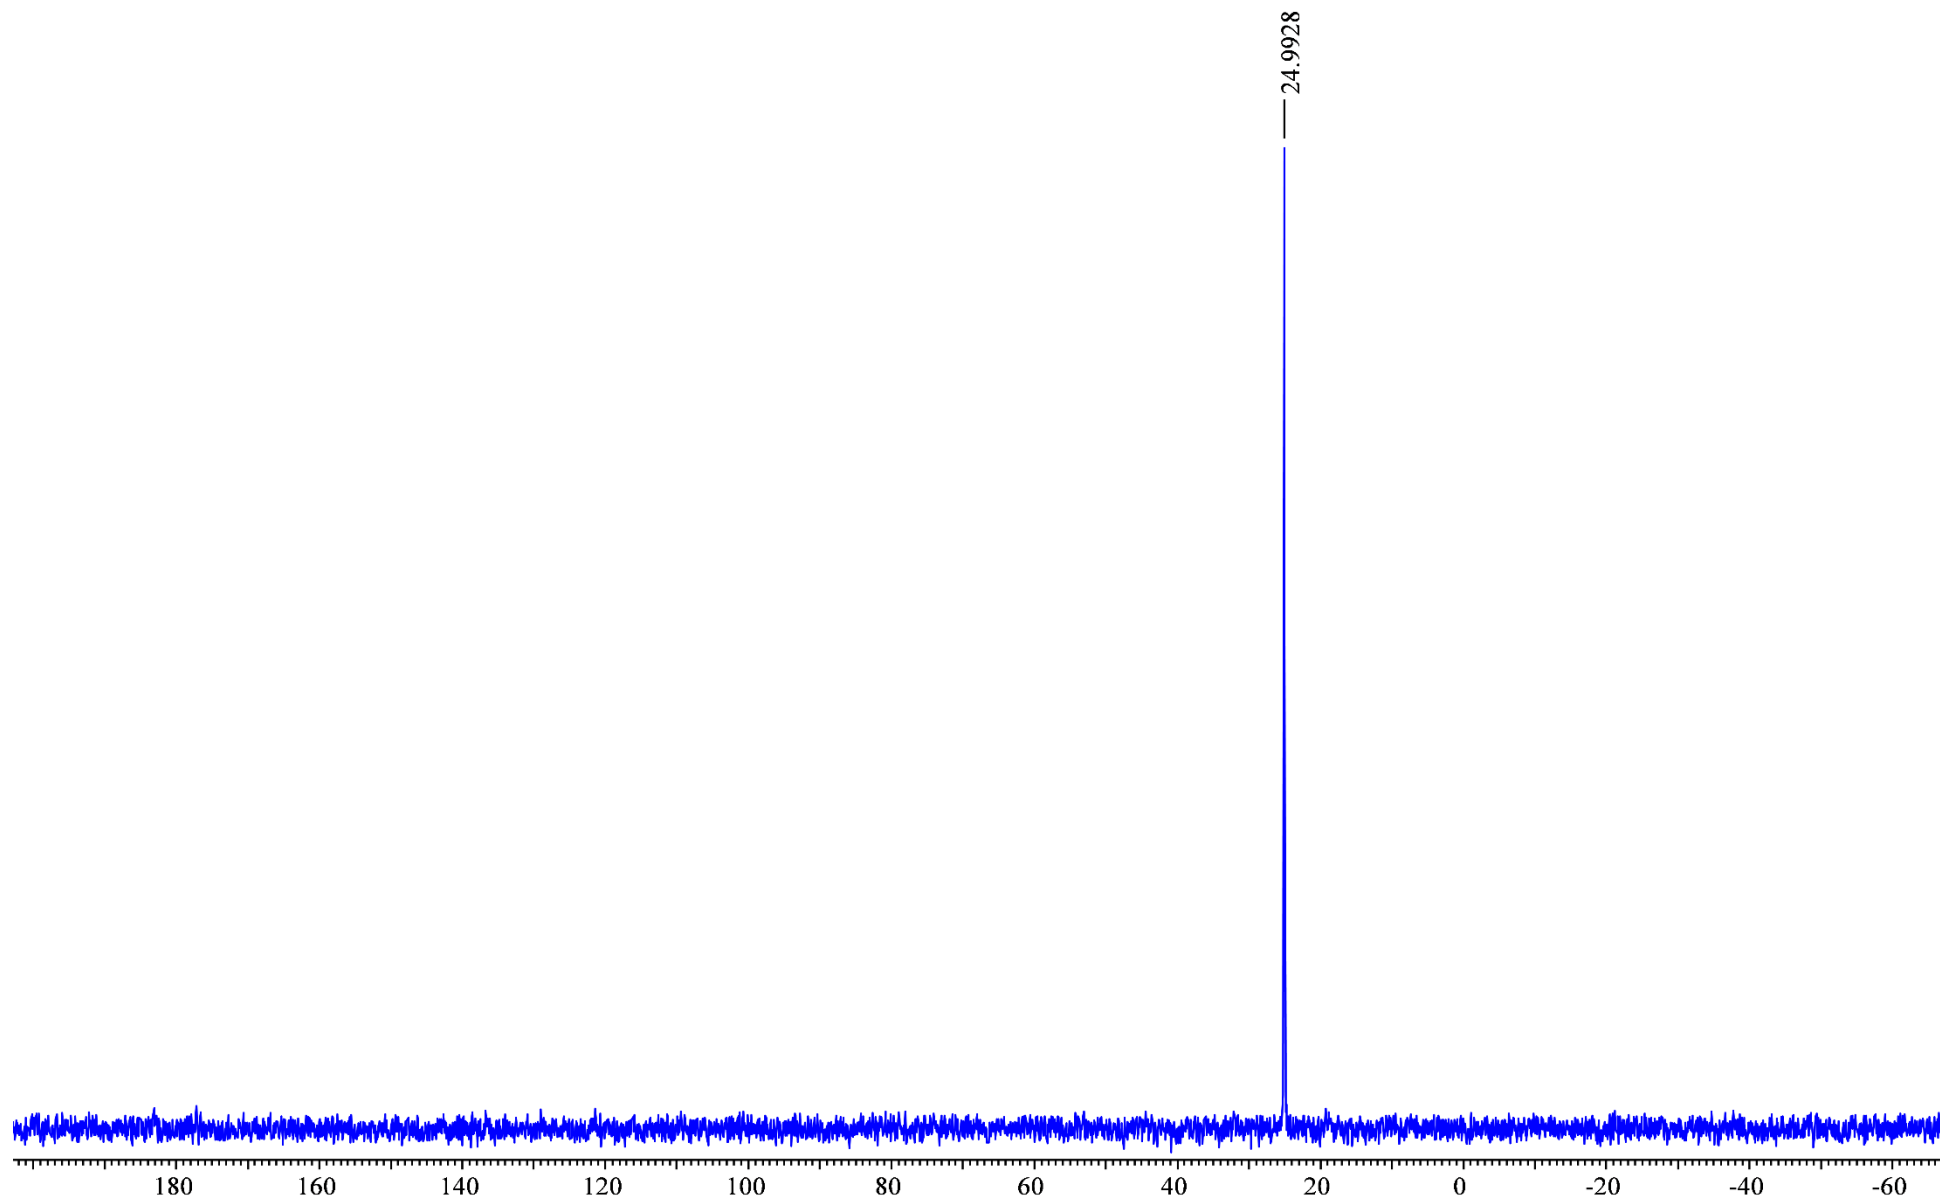

Figure S71.  $^{31}\text{P}$ - $\{^1\text{H}\}$  NMR spectrum (162 MHz,  $\text{CDCl}_3$ ) of compound **10**.

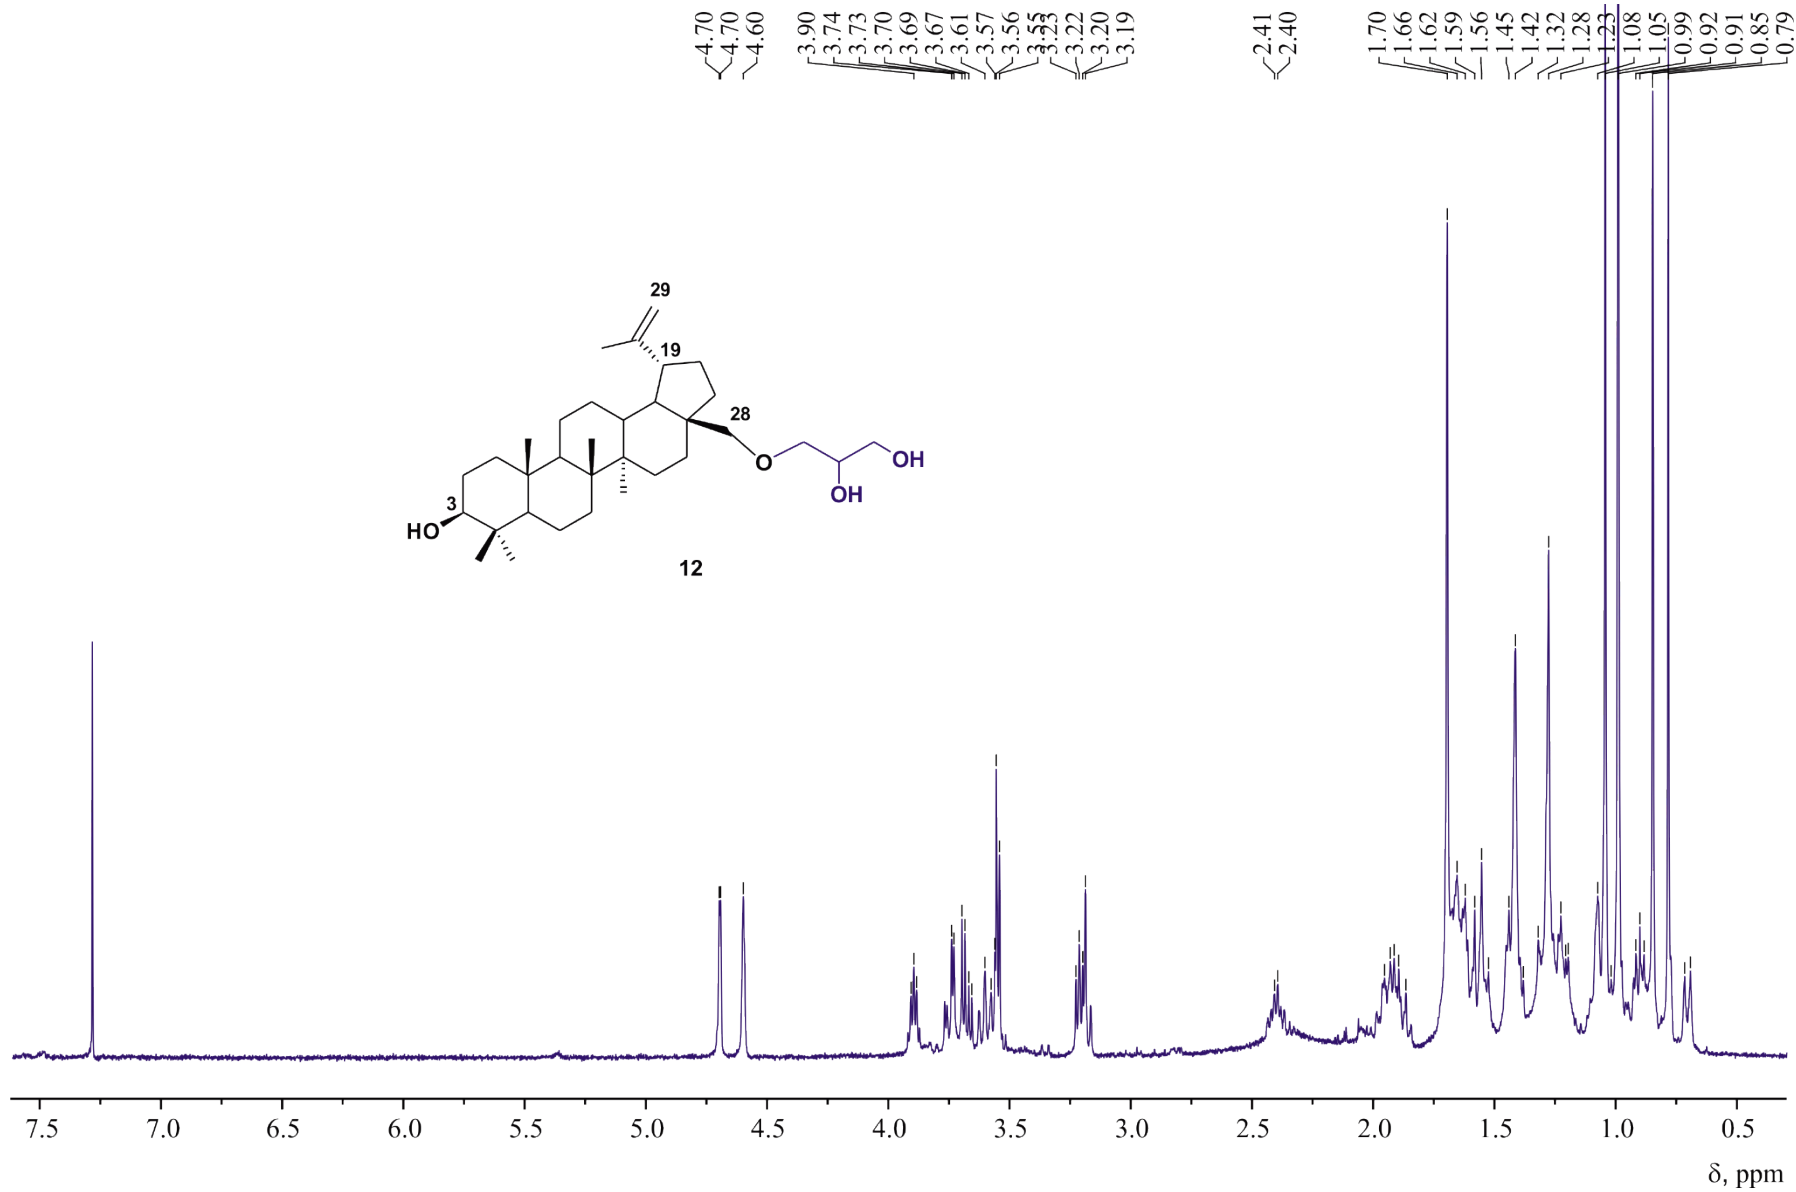

Figure S72.  $^1\text{H}$  NMR spectrum (400 MHz,  $\text{CDCl}_3$ ) of compound **12**.

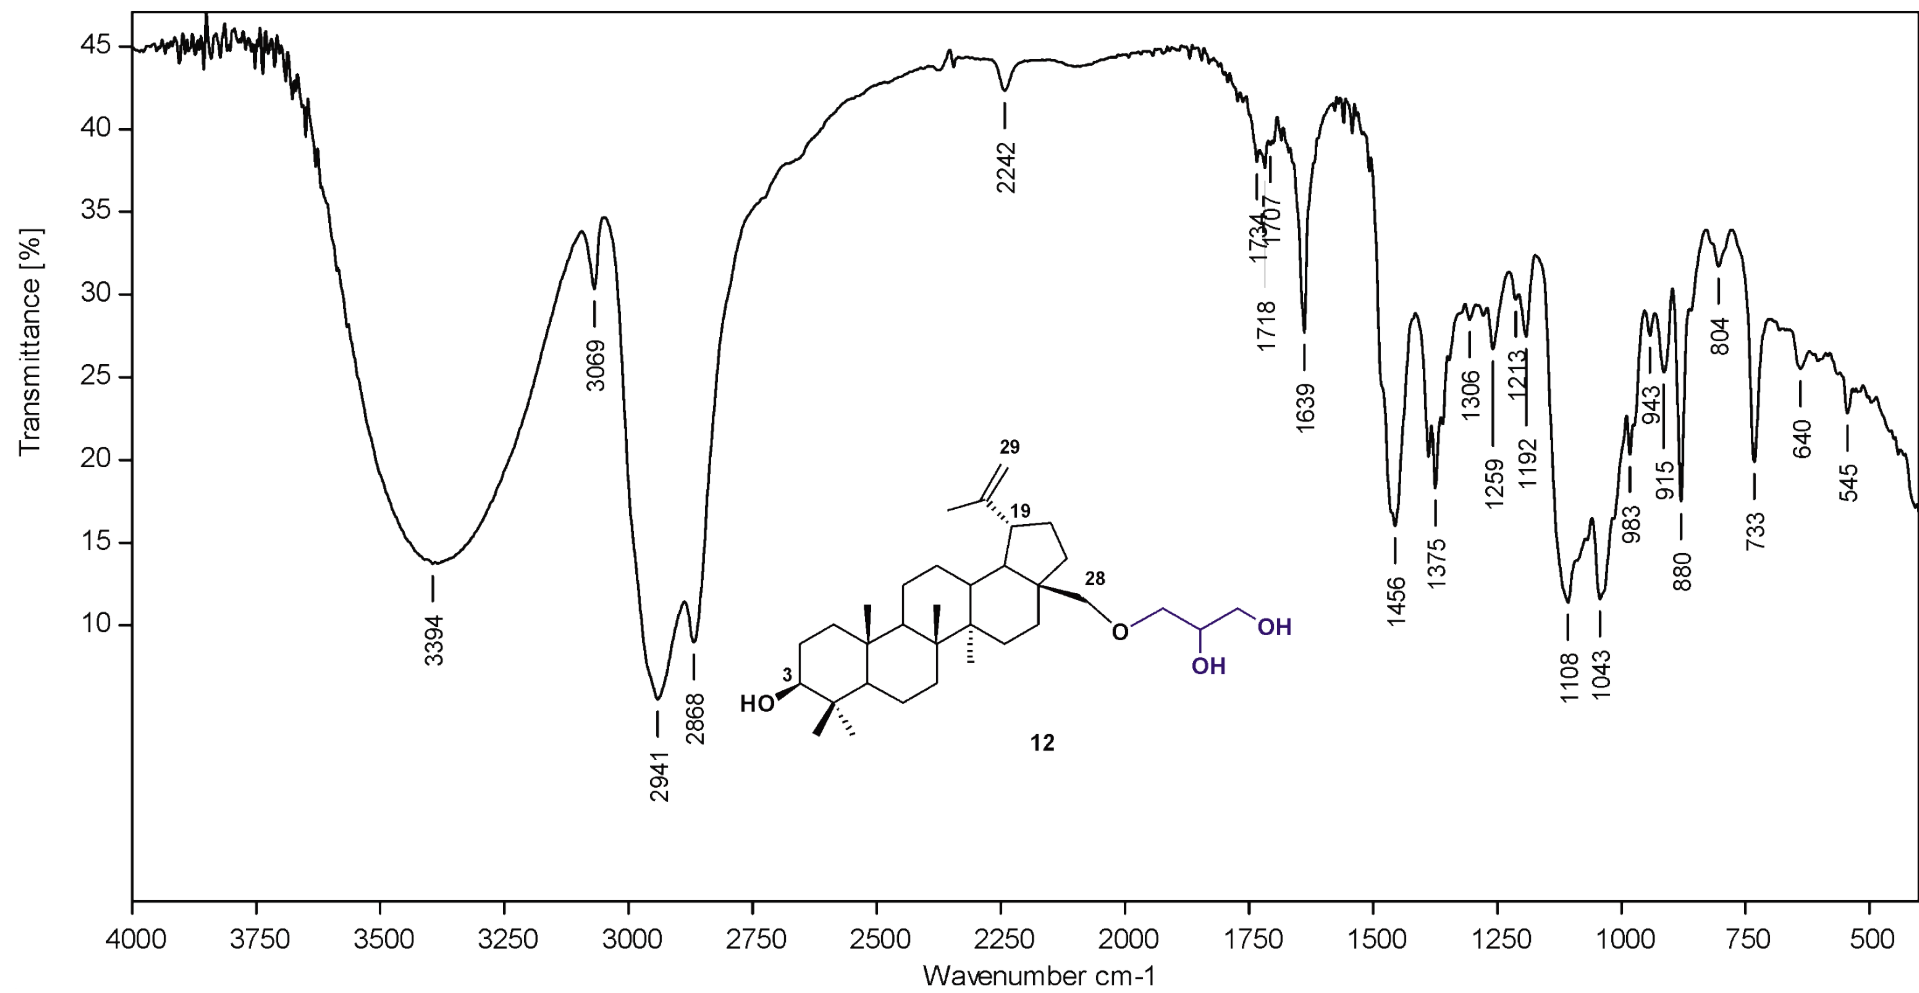

Figure S73. IR (KBr) spectrum of **12**.

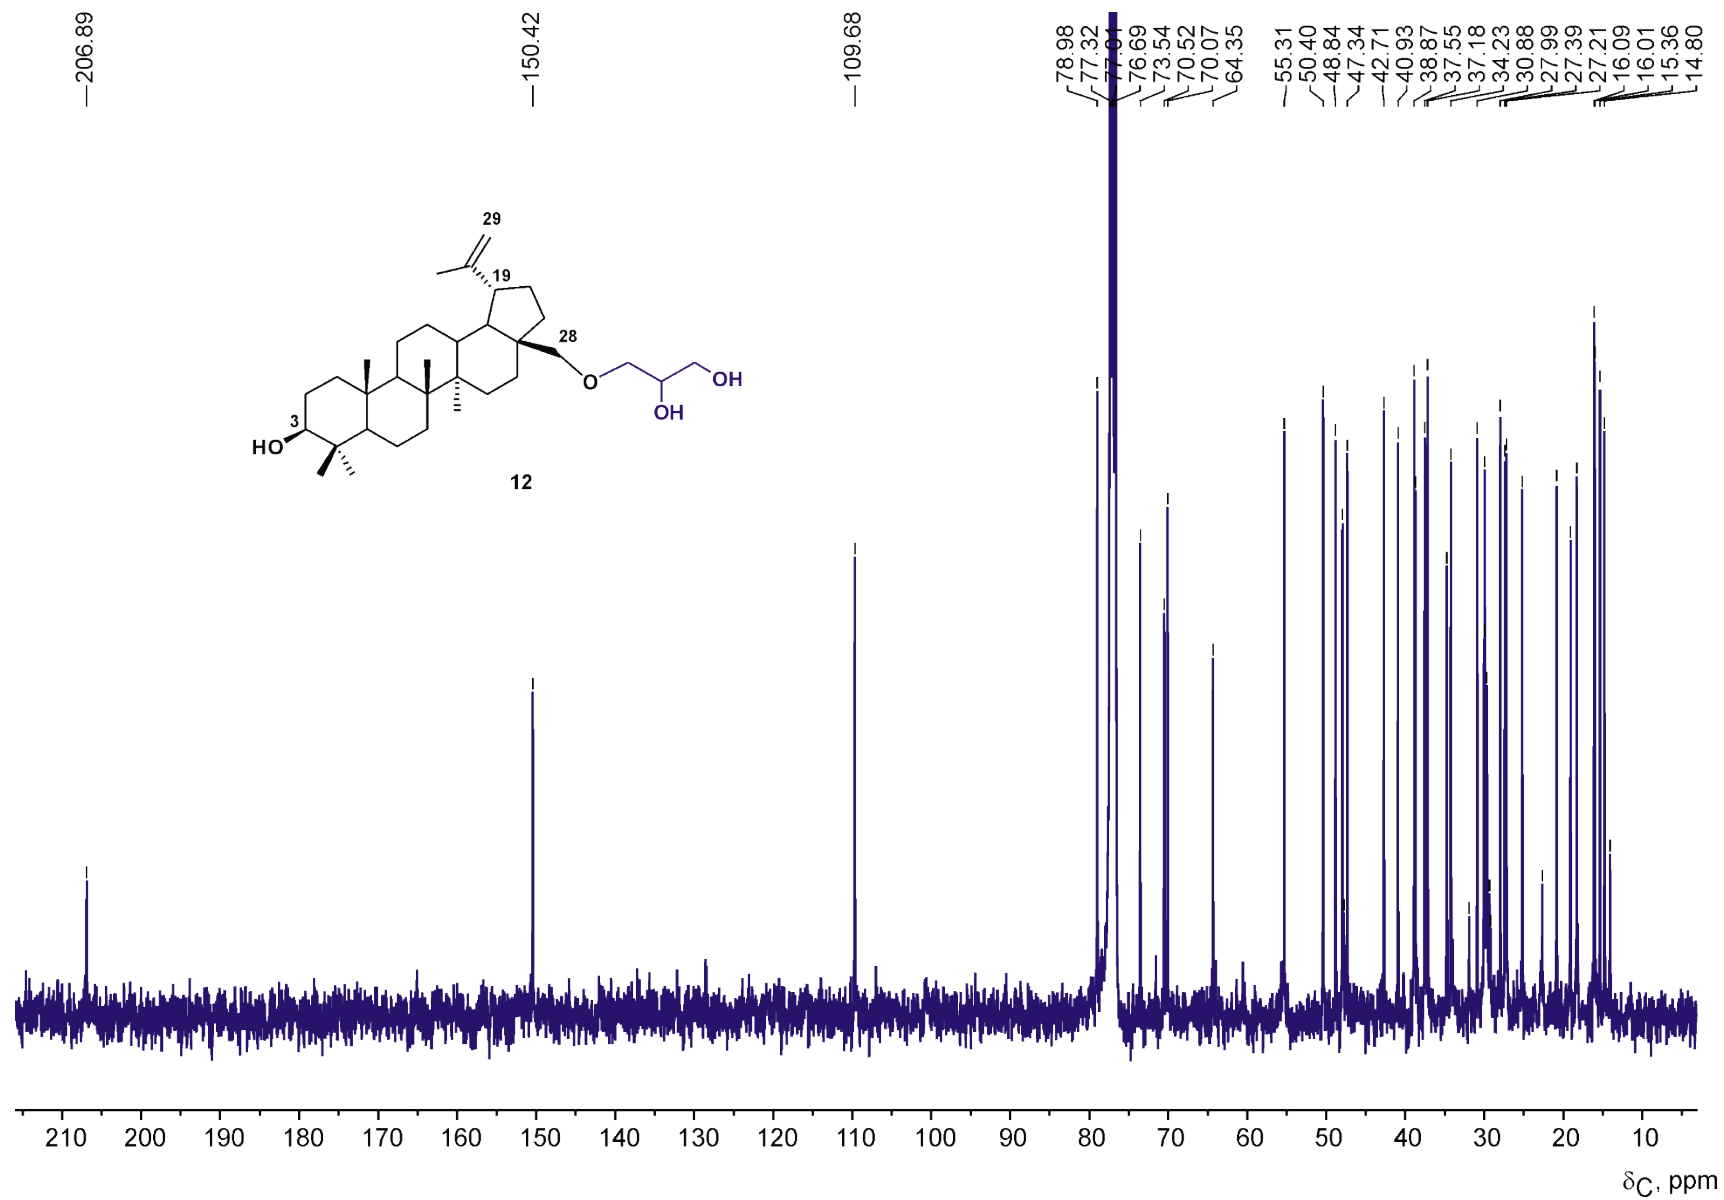

Figure S74.  $^{13}\text{C}$ - $\{^1\text{H}\}$  NMR (CDCl<sub>3</sub>, 100.6 MHz) spectrum of **12**.

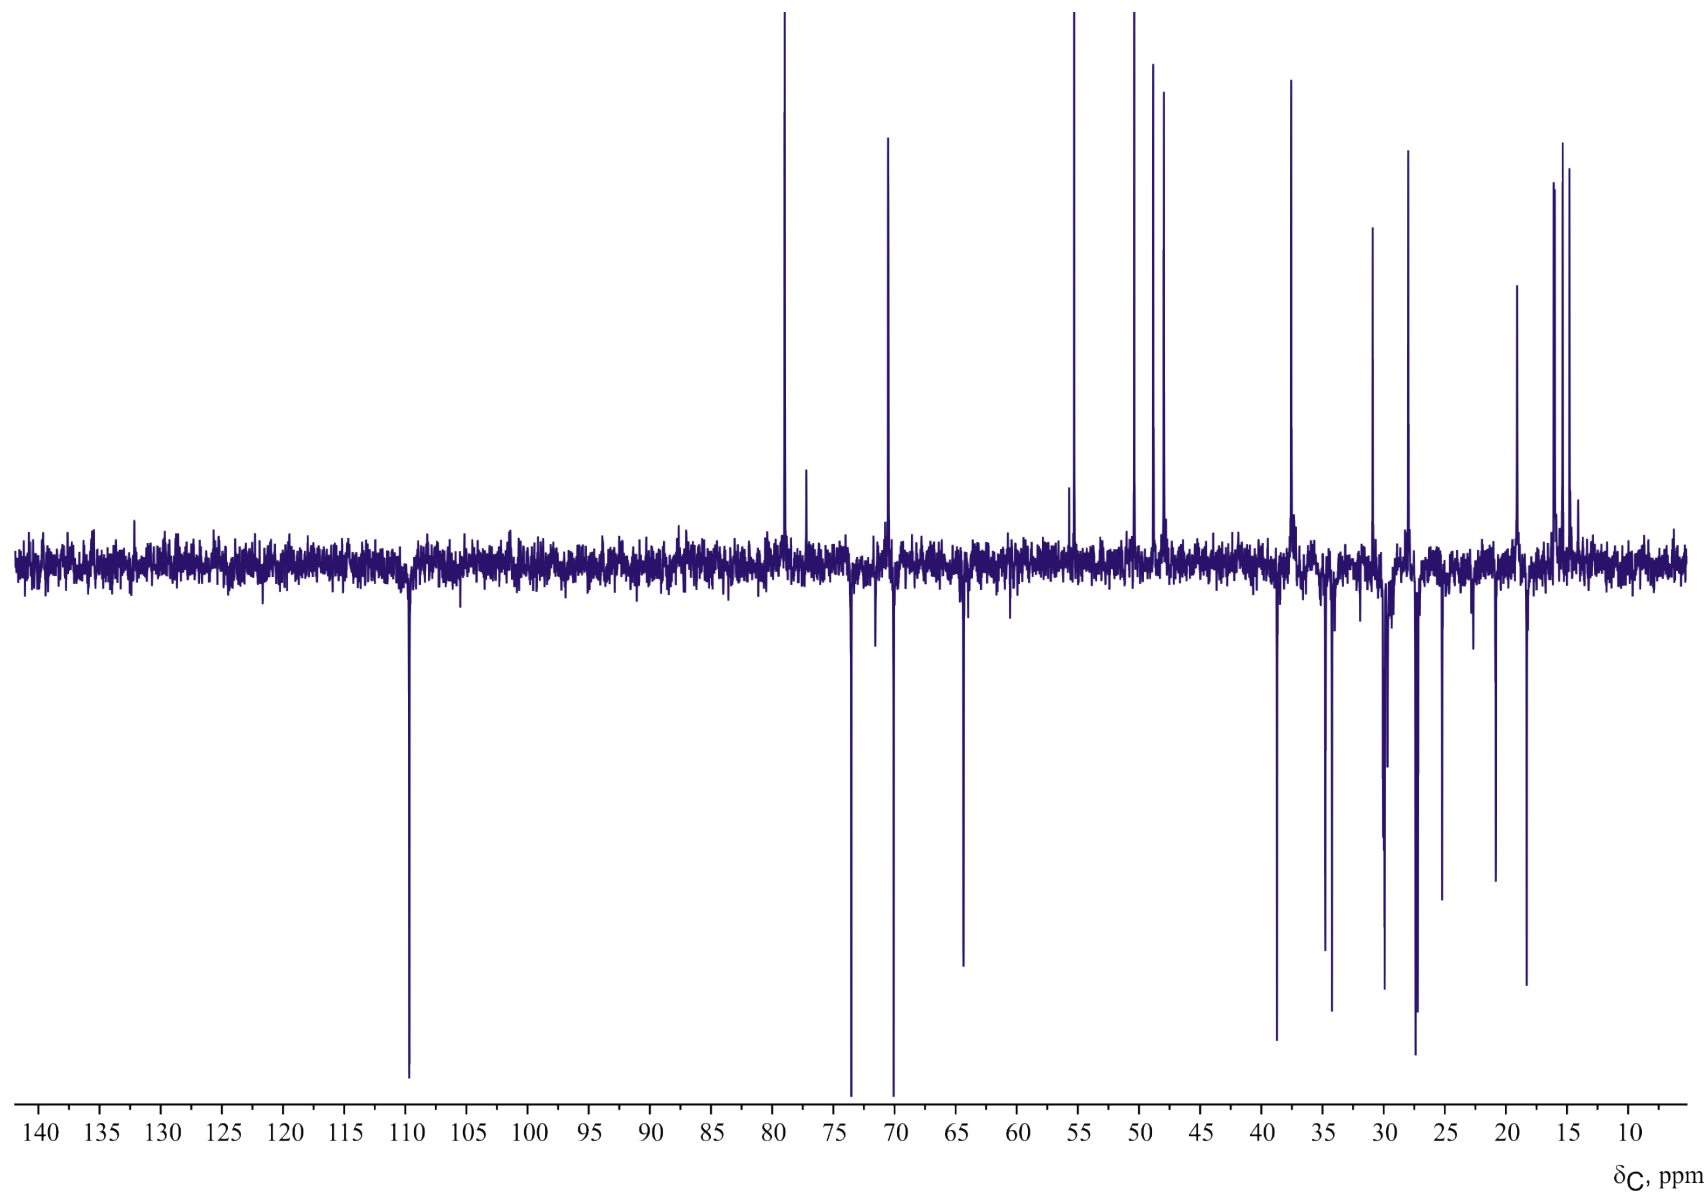

Figure S75.  $^{13}\text{C}$ - $\{^1\text{H}\}$  apt NMR ( $\text{CDCl}_3$ , 100.6 MHz) spectrum of **12**.

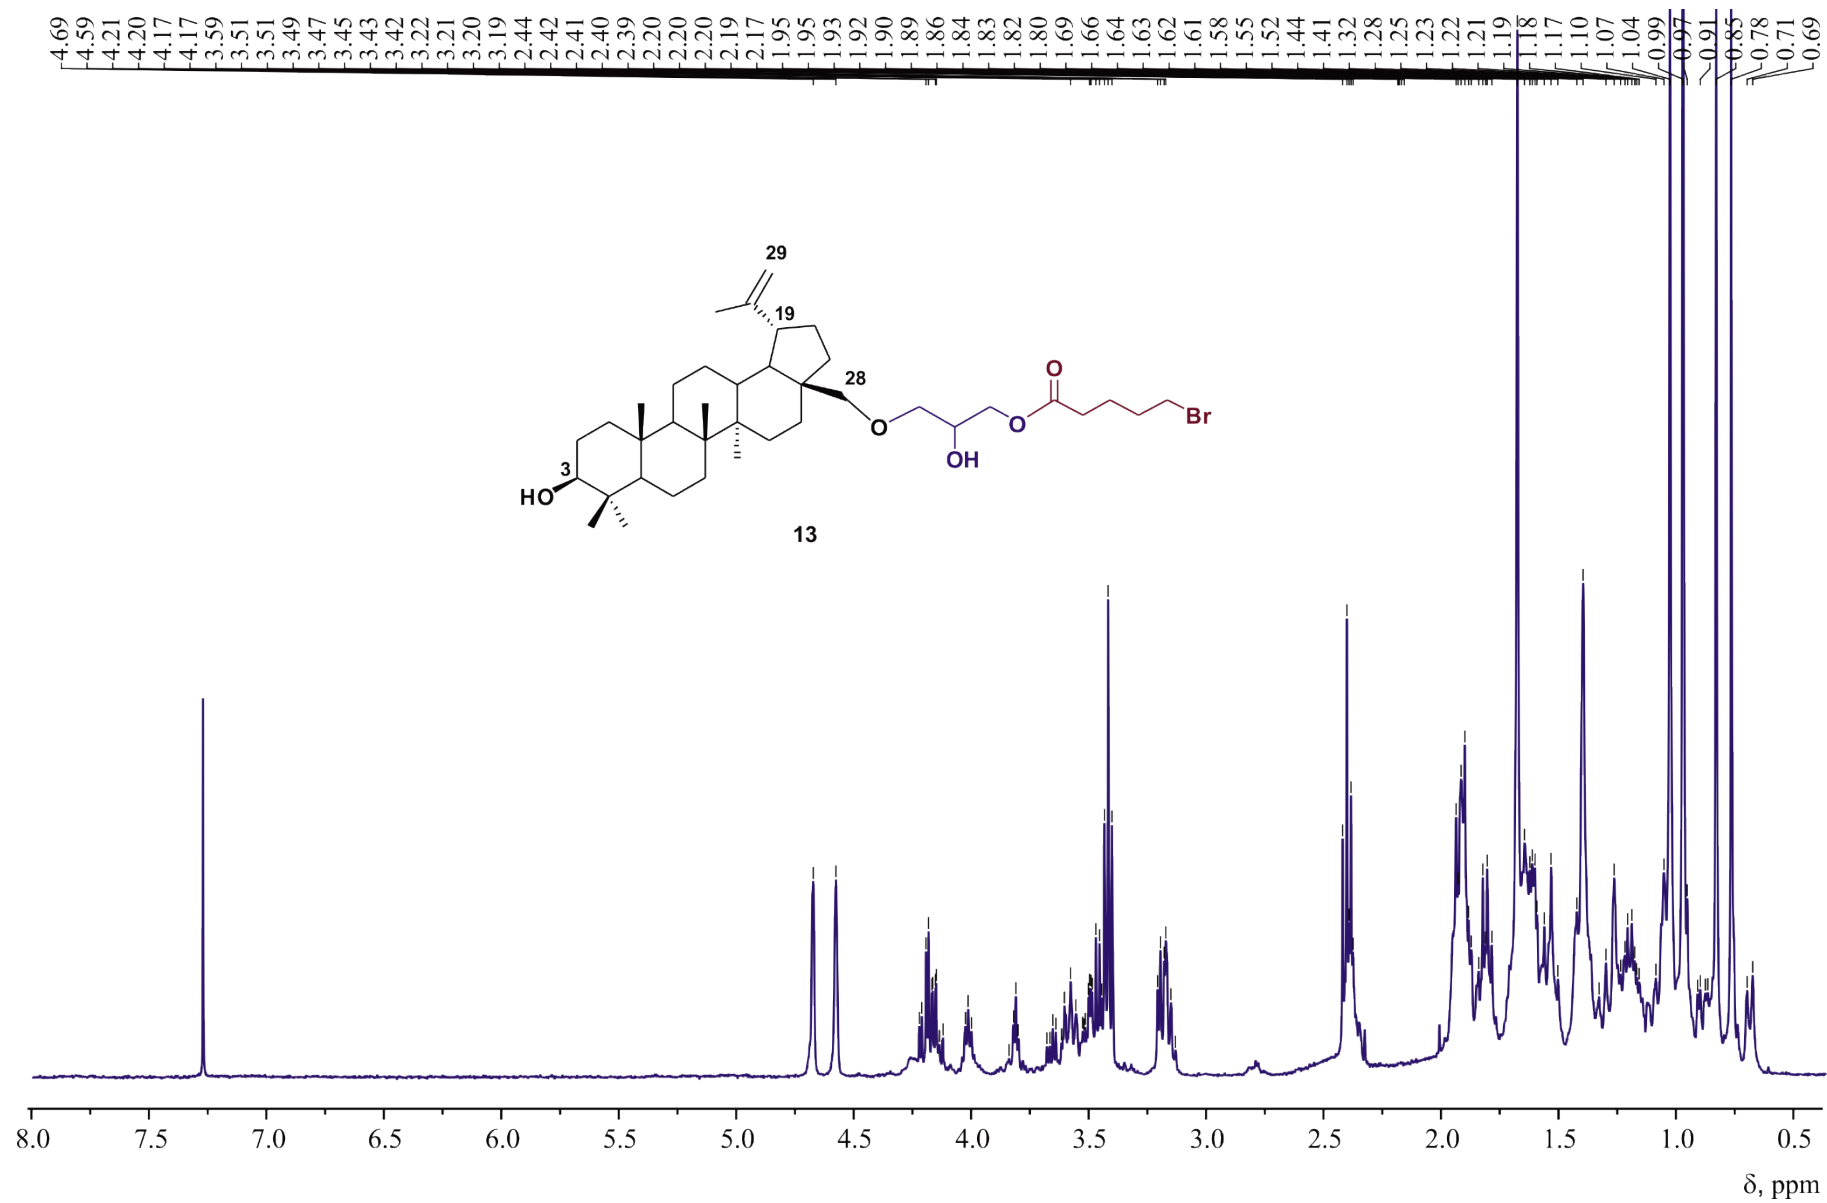

Figure S76. <sup>1</sup>H NMR spectrum (400 MHz, CDCl<sub>3</sub>) of compound 13.



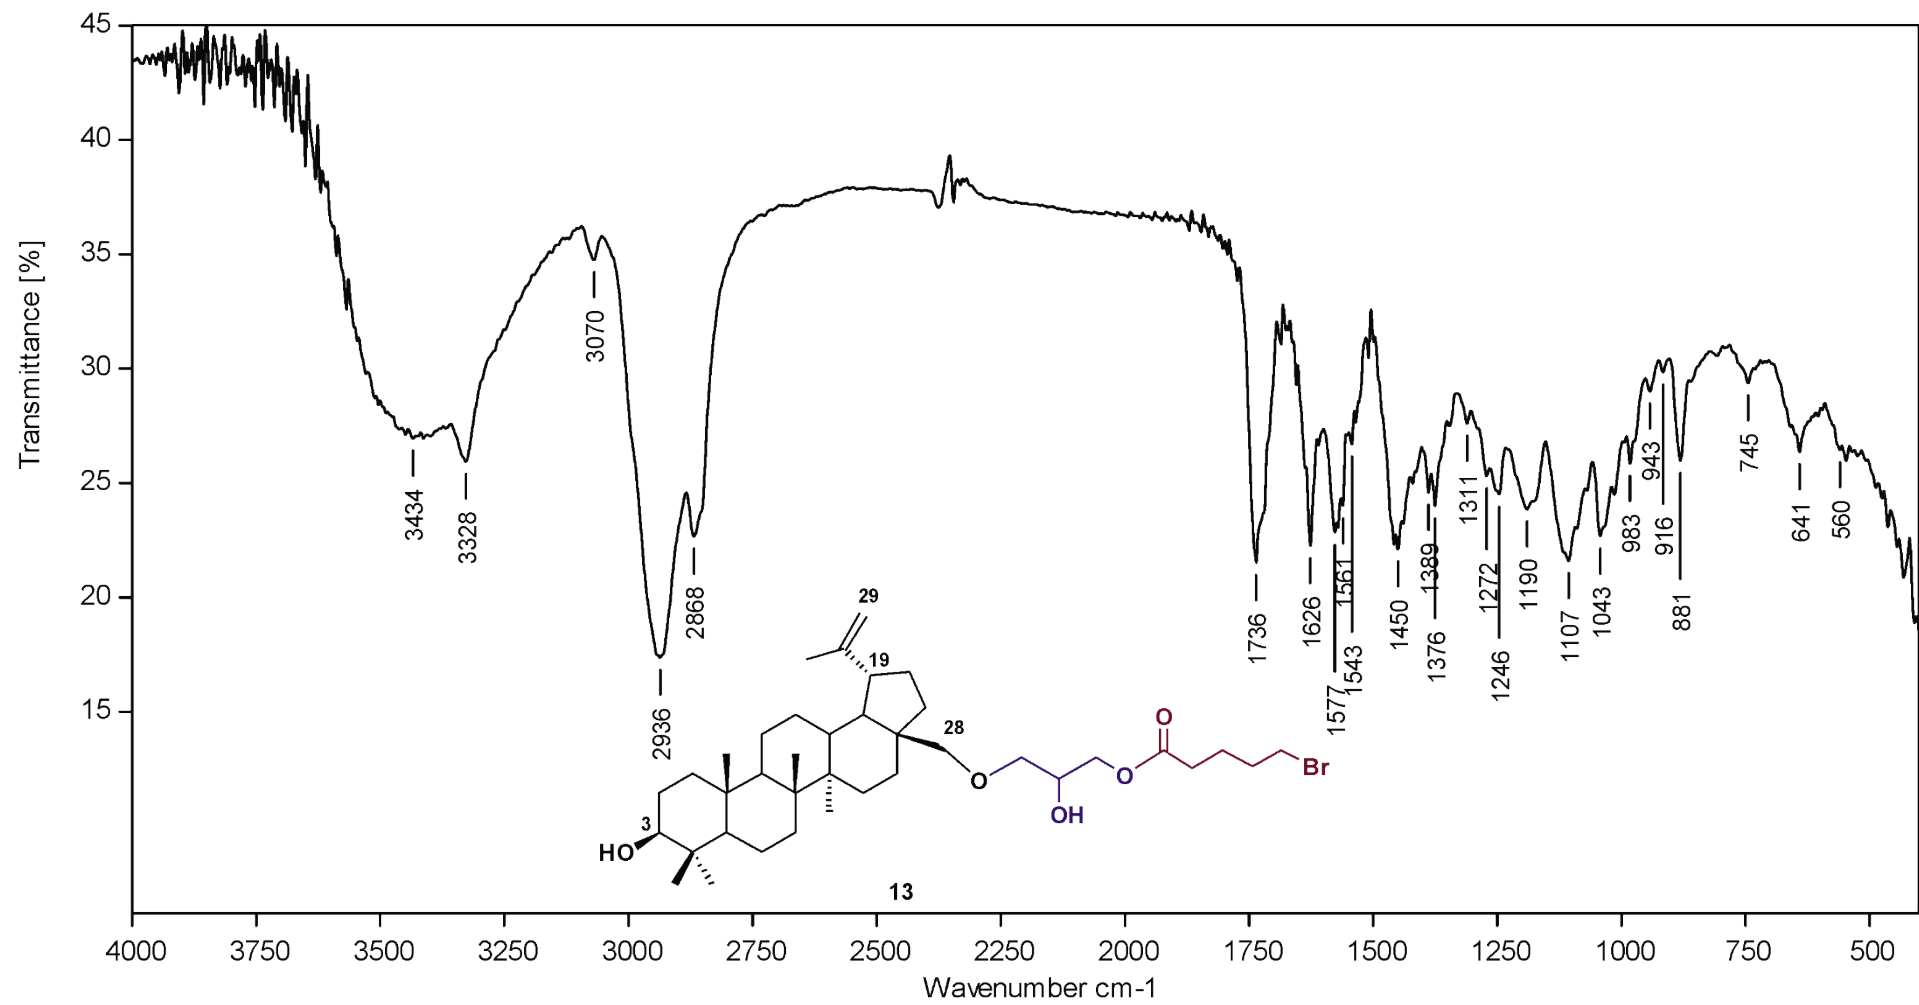

Figure S77. IR (KBr) spectrum of **13**.

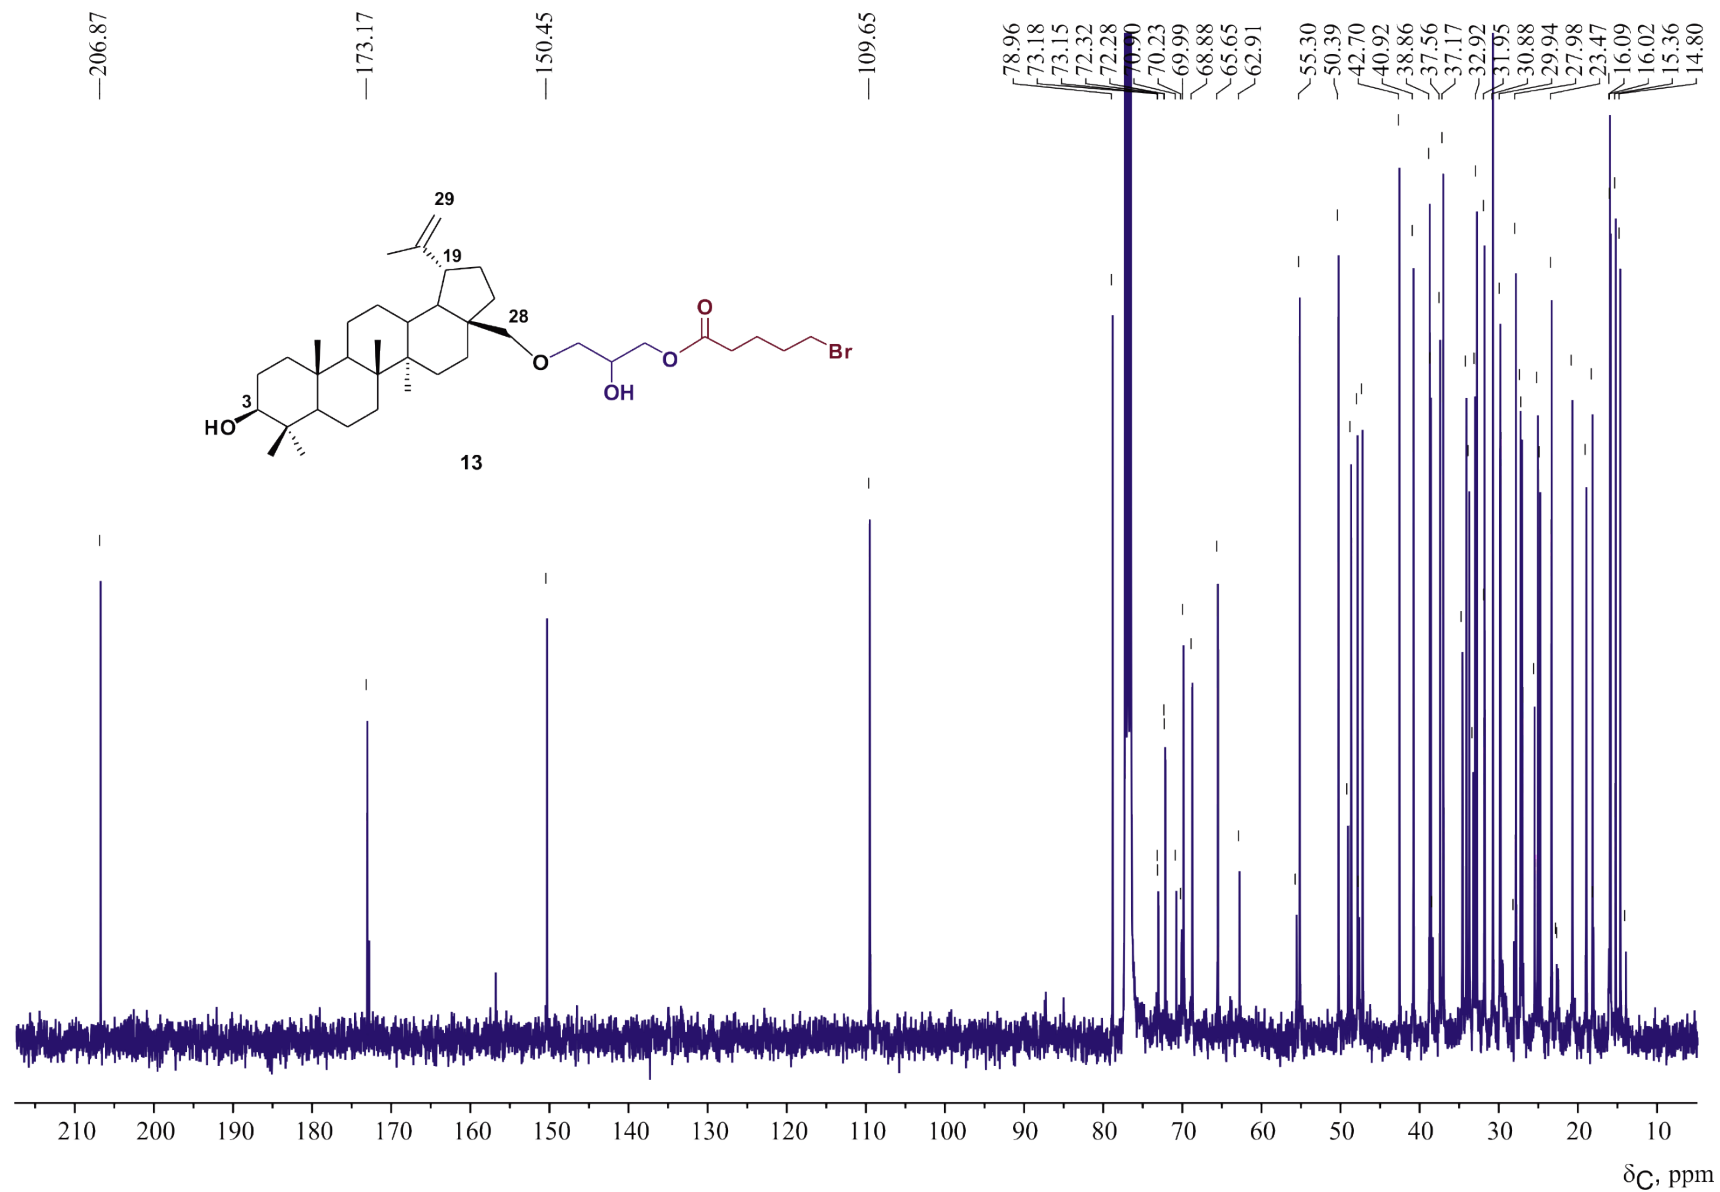

Figure S78.  $^{13}\text{C}$ - $\{^1\text{H}\}$  NMR (CDCl<sub>3</sub>, 100.6 MHz) spectrum of **13**.

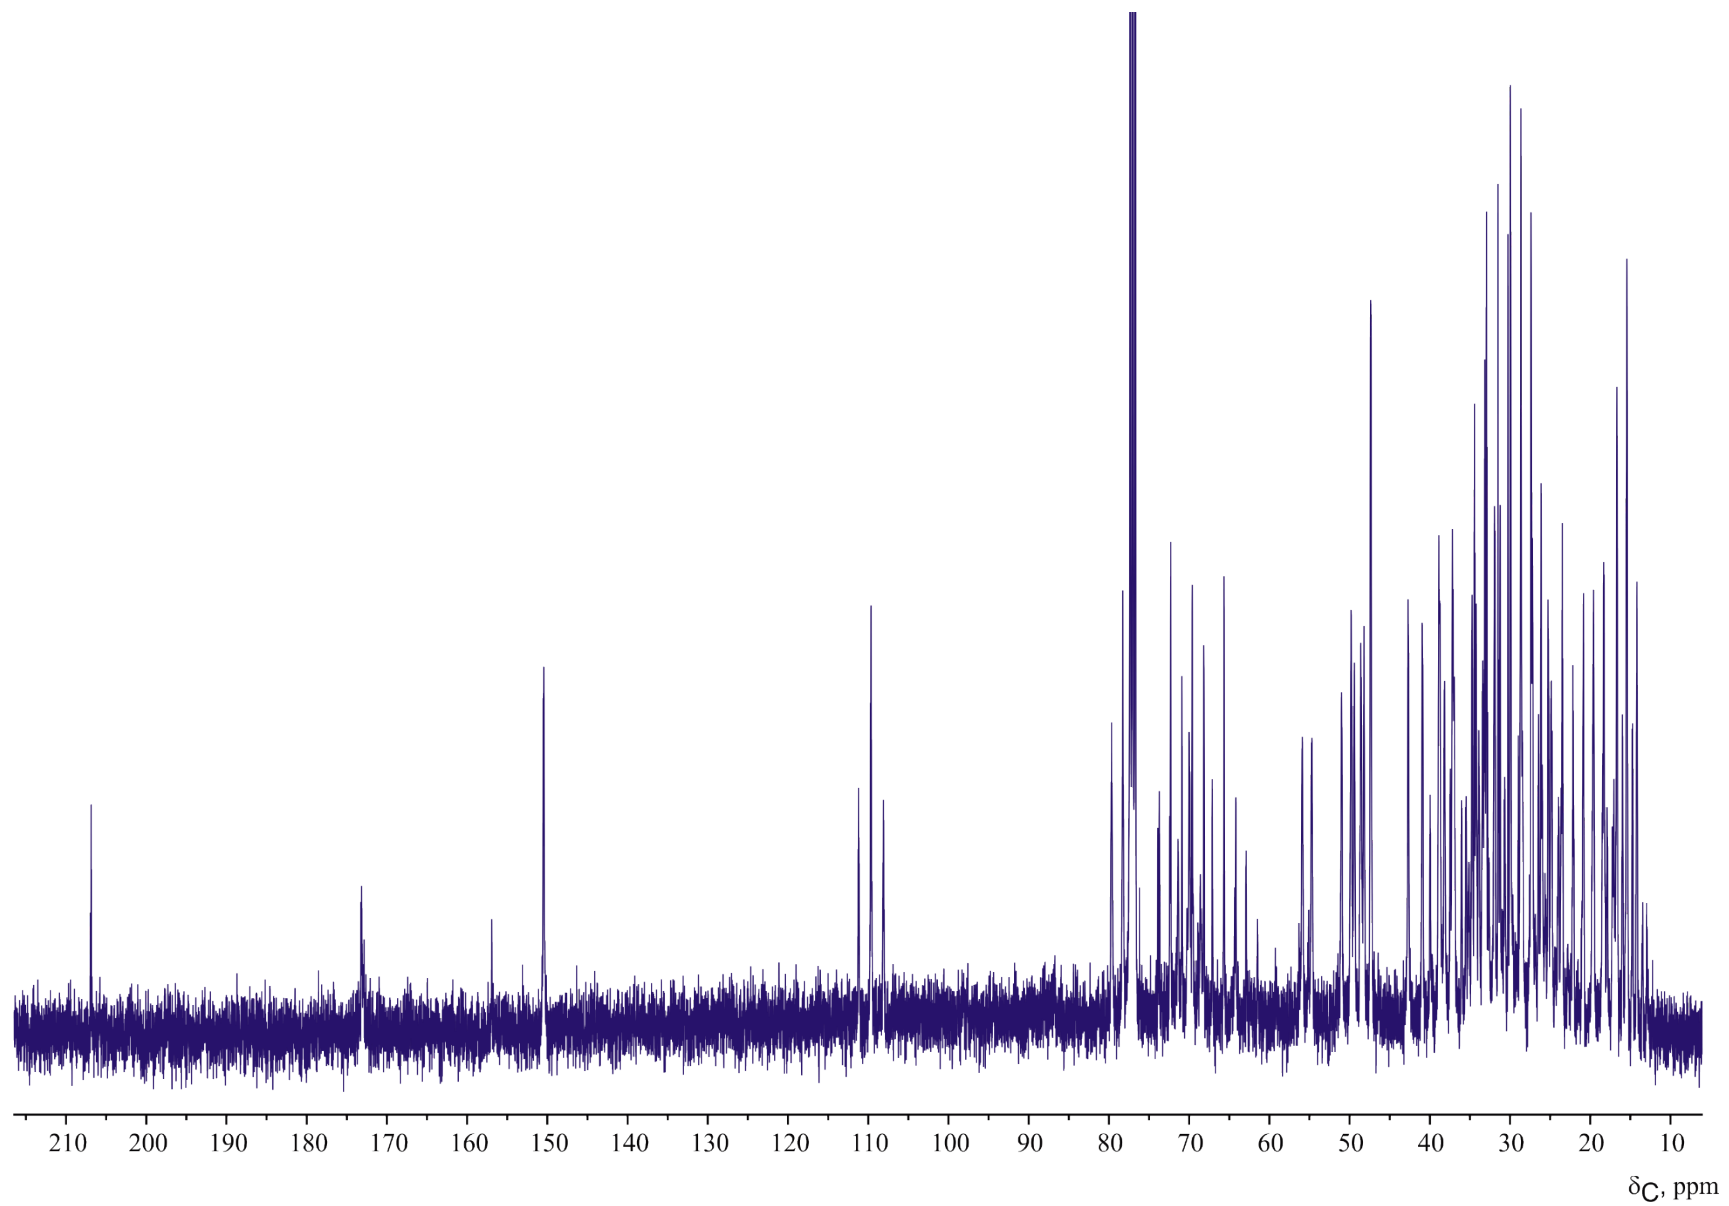

Figure S79.  $^{13}\text{C}$  NMR ( $\text{CDCl}_3$ , 100.6 MHz) spectrum of **13**.

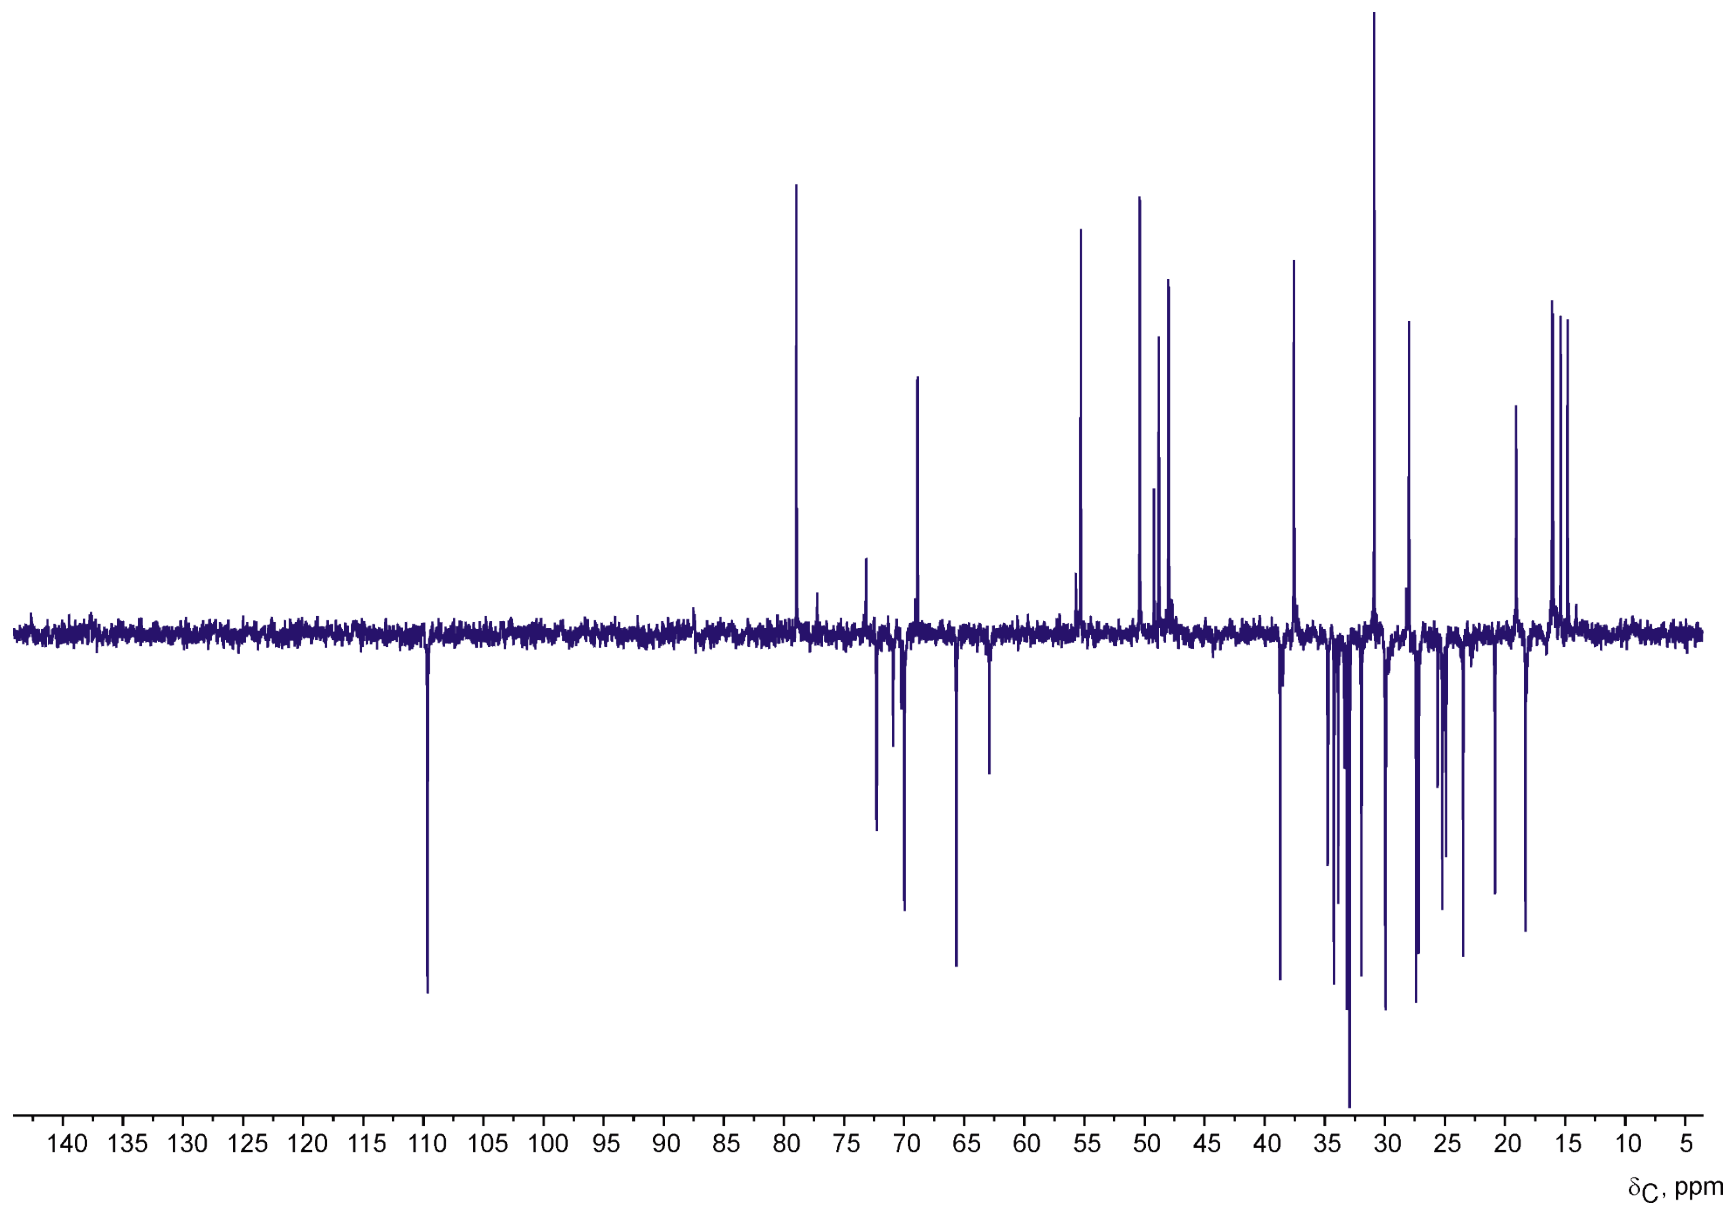

Figure S80.  $^{13}\text{C}$ - $\{^1\text{H}\}$  apt NMR ( $\text{CDCl}_3$ , 100.6 MHz) spectrum of **13**.

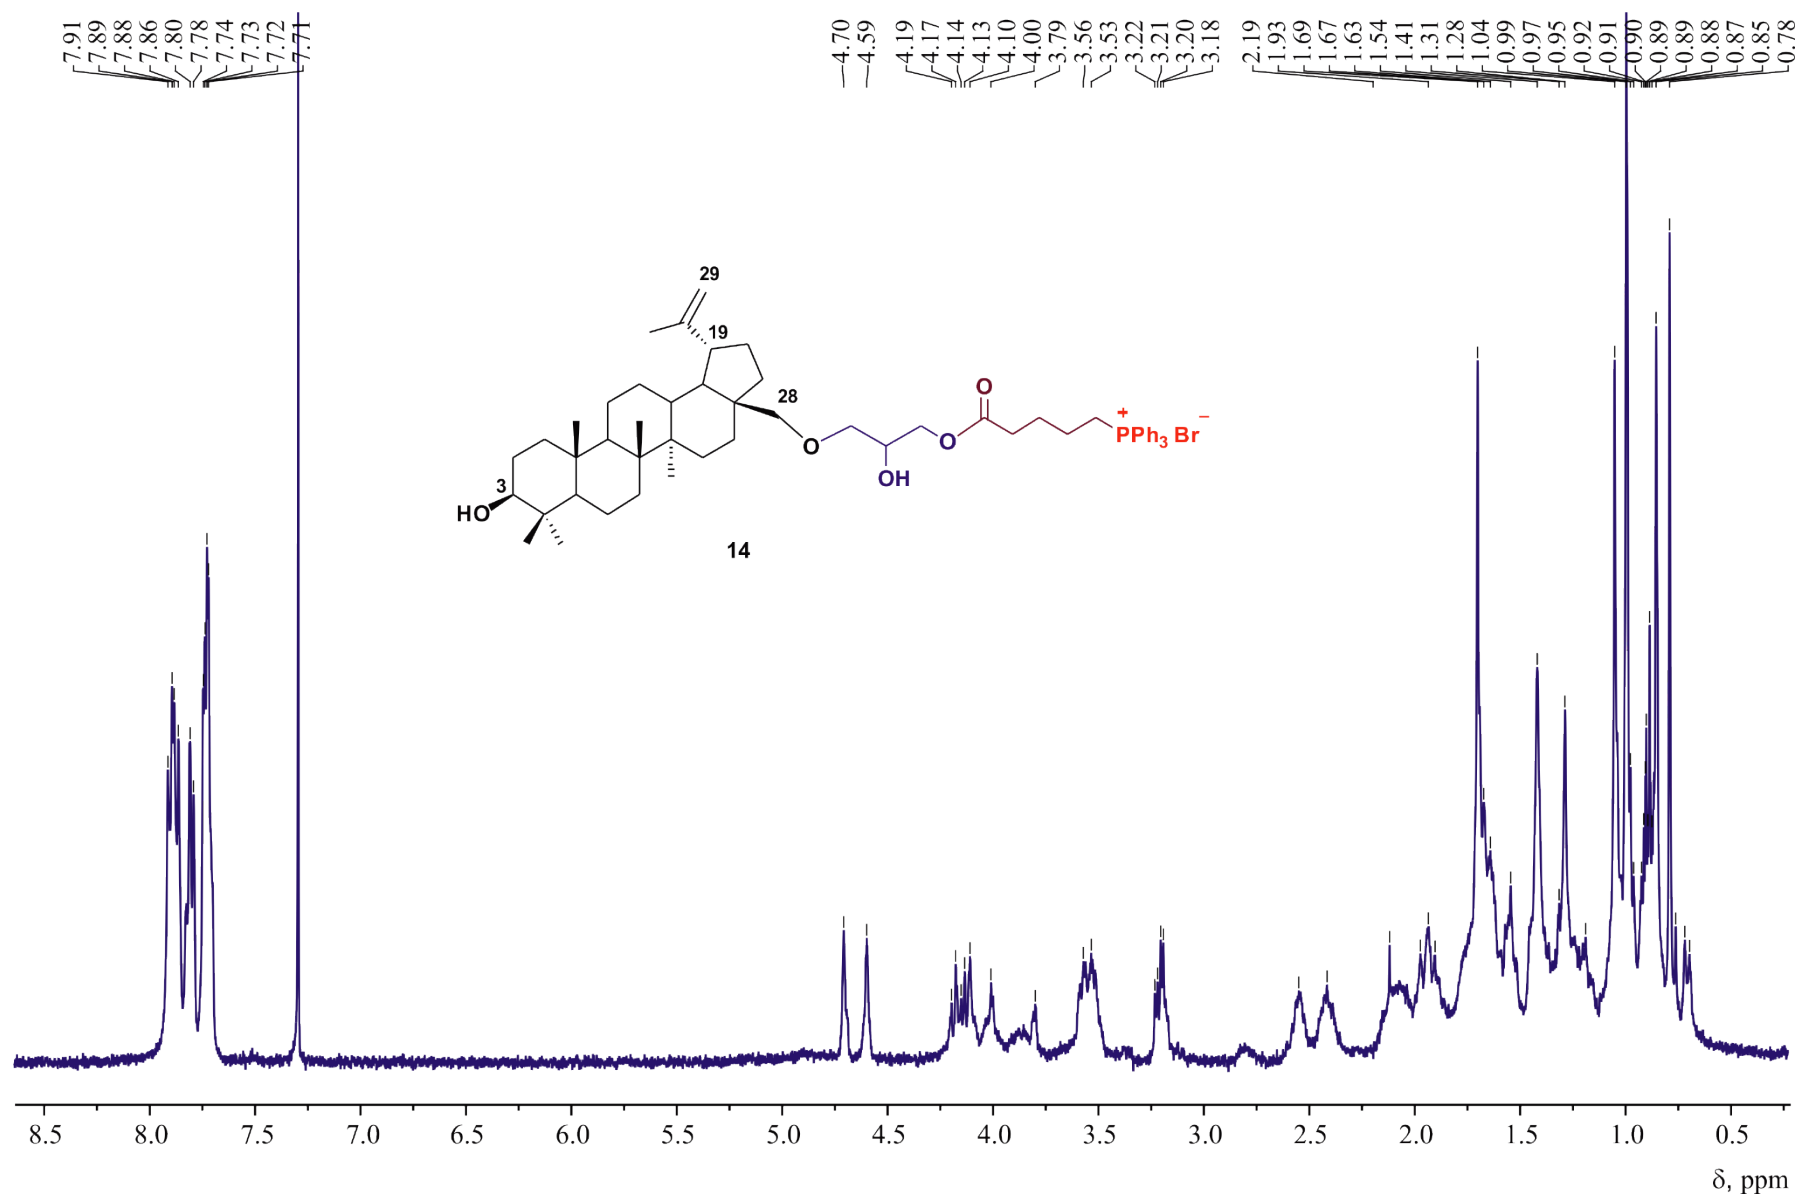

Figure S81. <sup>1</sup>H NMR spectrum (400 MHz, CDCl<sub>3</sub>) of compound 14.

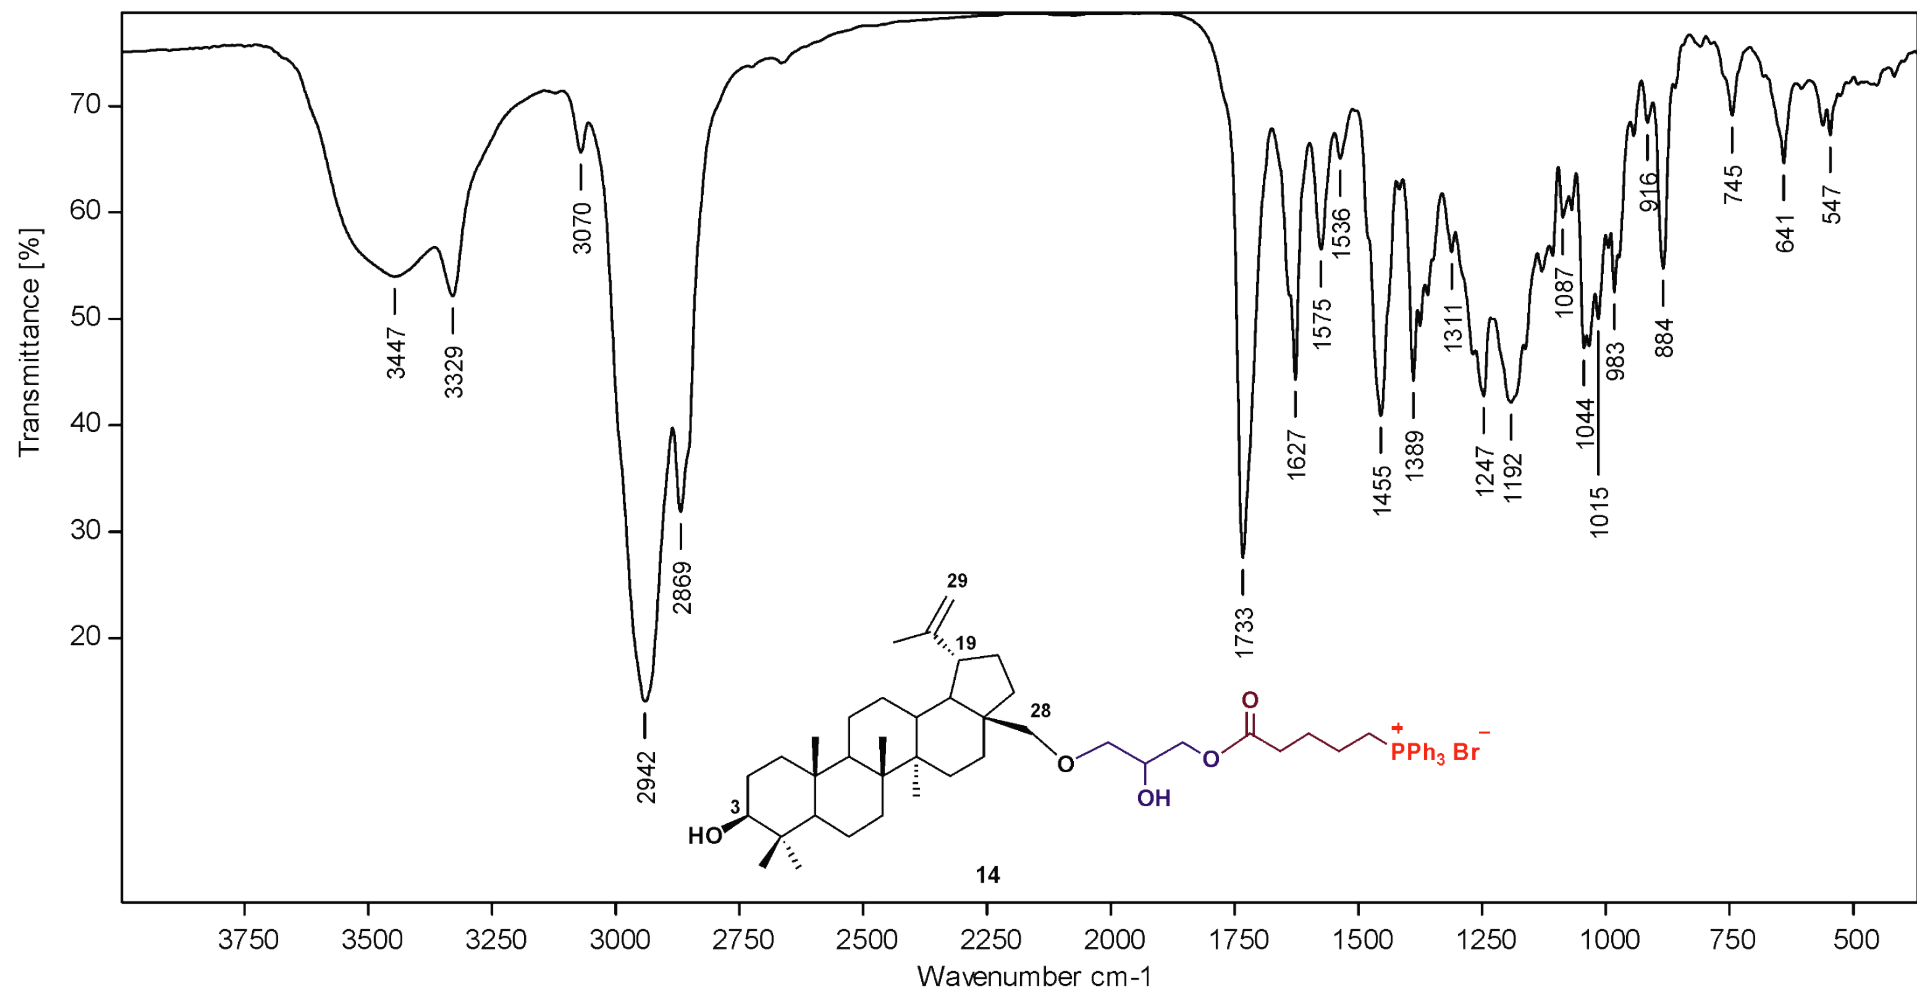

Figure S82. IR (KBr) spectrum of **14**.

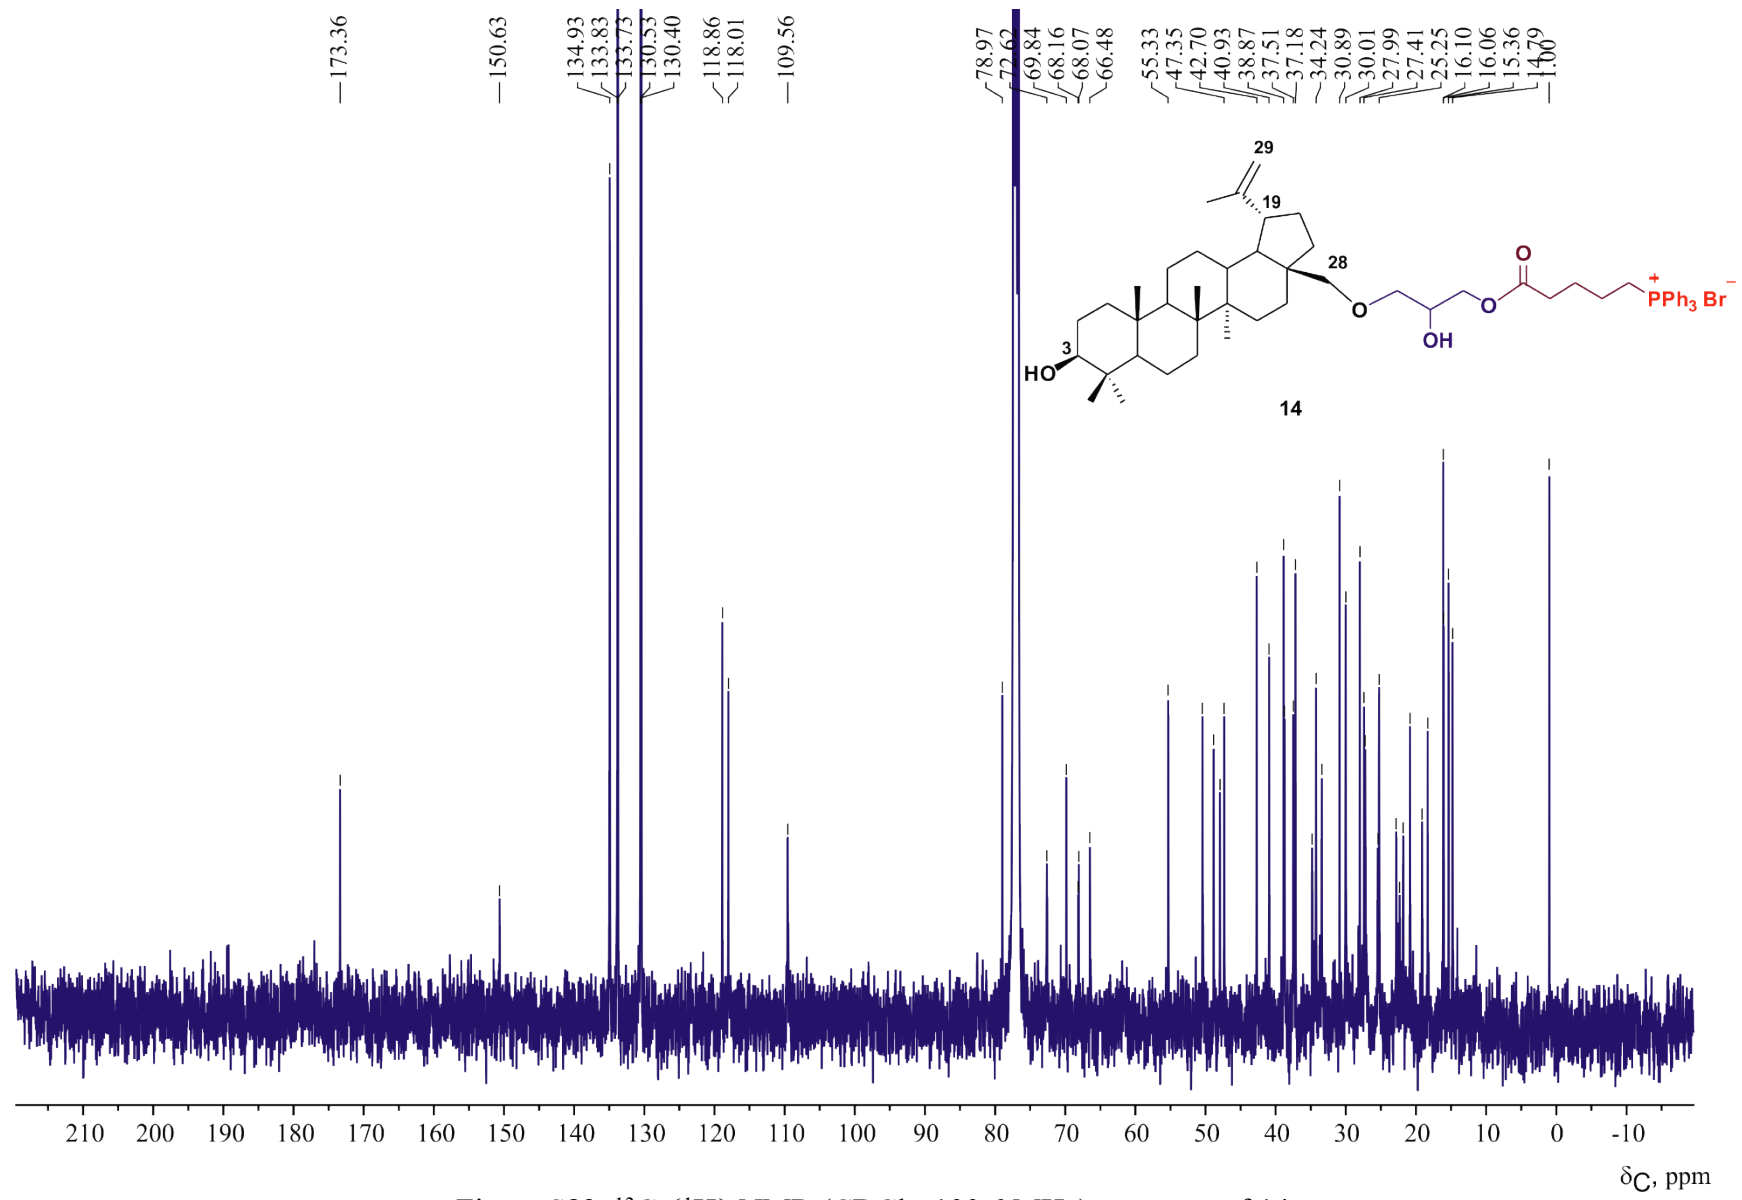

Figure S83.  $^{13}\text{C}\{-^1\text{H}\}$  NMR ( $\text{CDCl}_3$ , 100.6 MHz) spectrum of **14**.

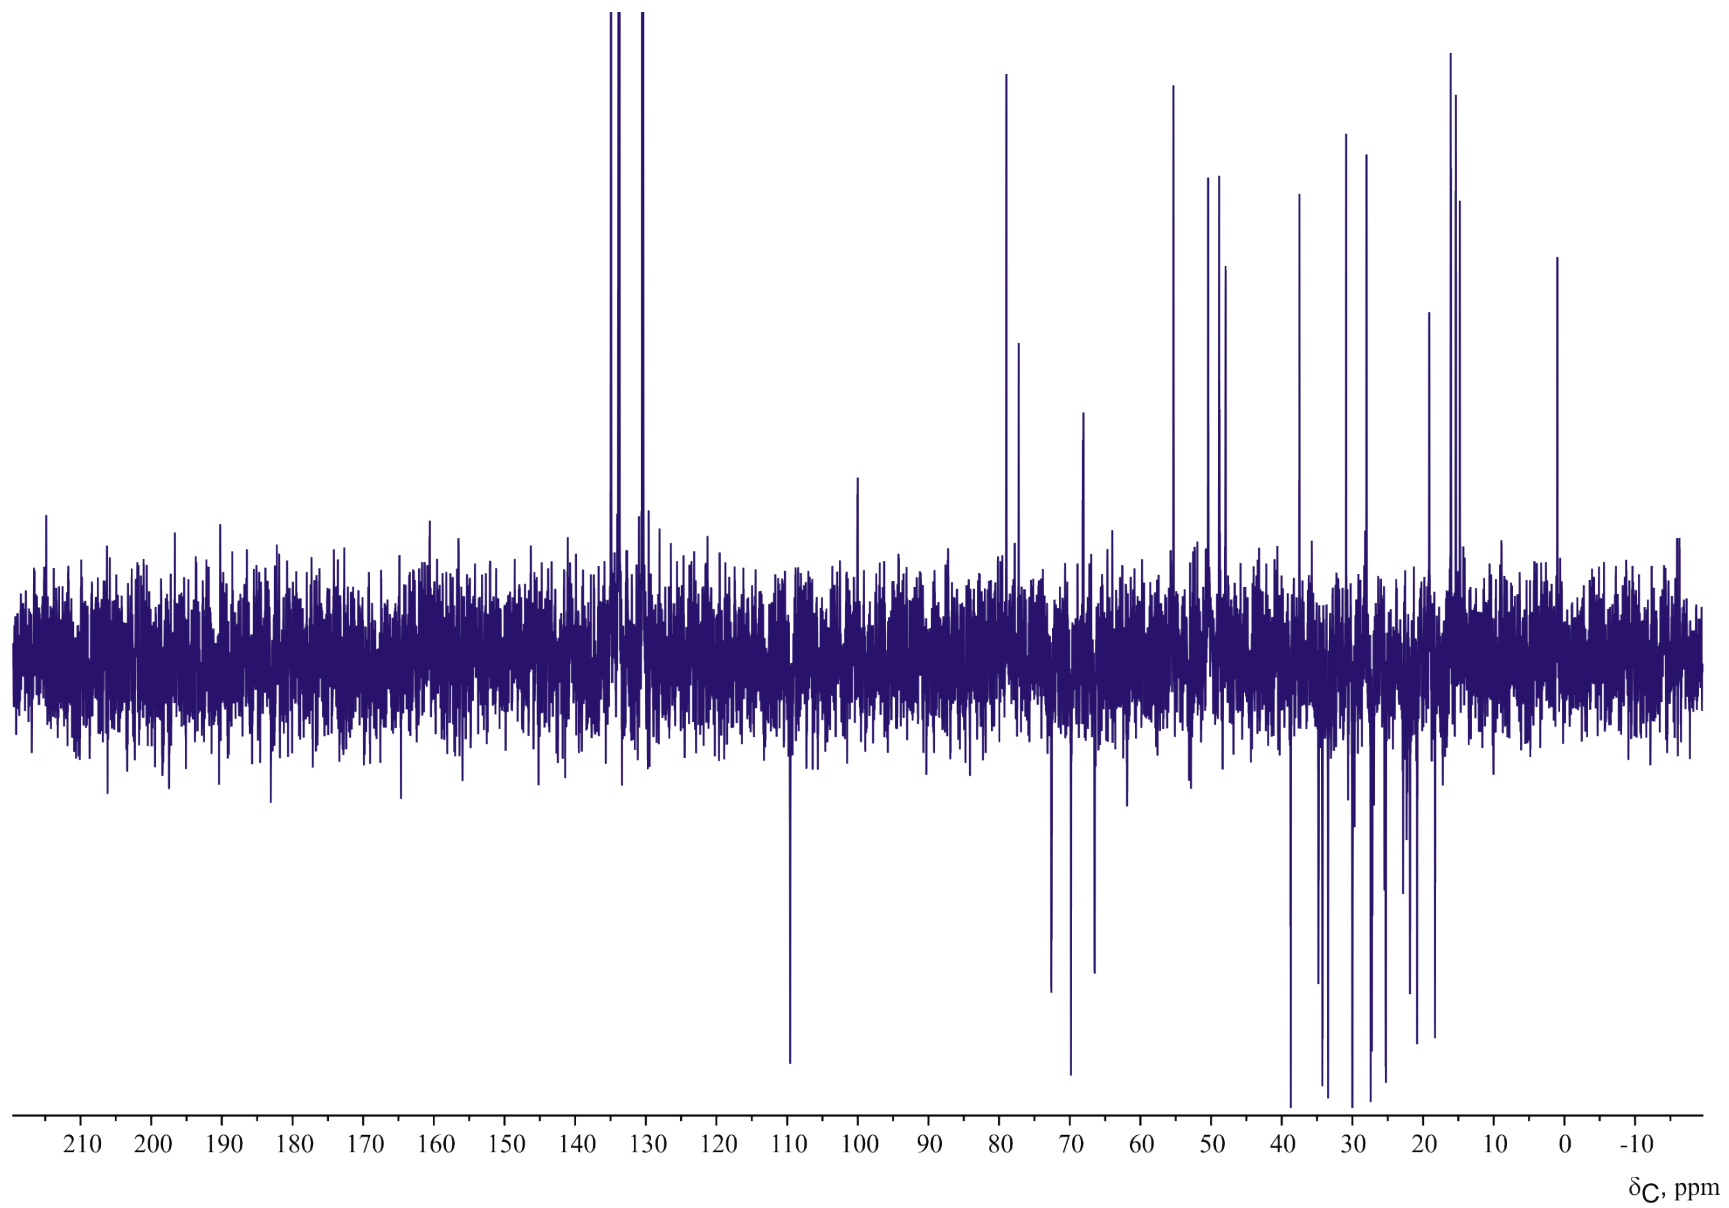

Figure S84.  $^{13}\text{C}$ - $\{^1\text{H}\}$  apt NMR ( $\text{CDCl}_3$ , 100.6 MHz) spectrum of **14**.



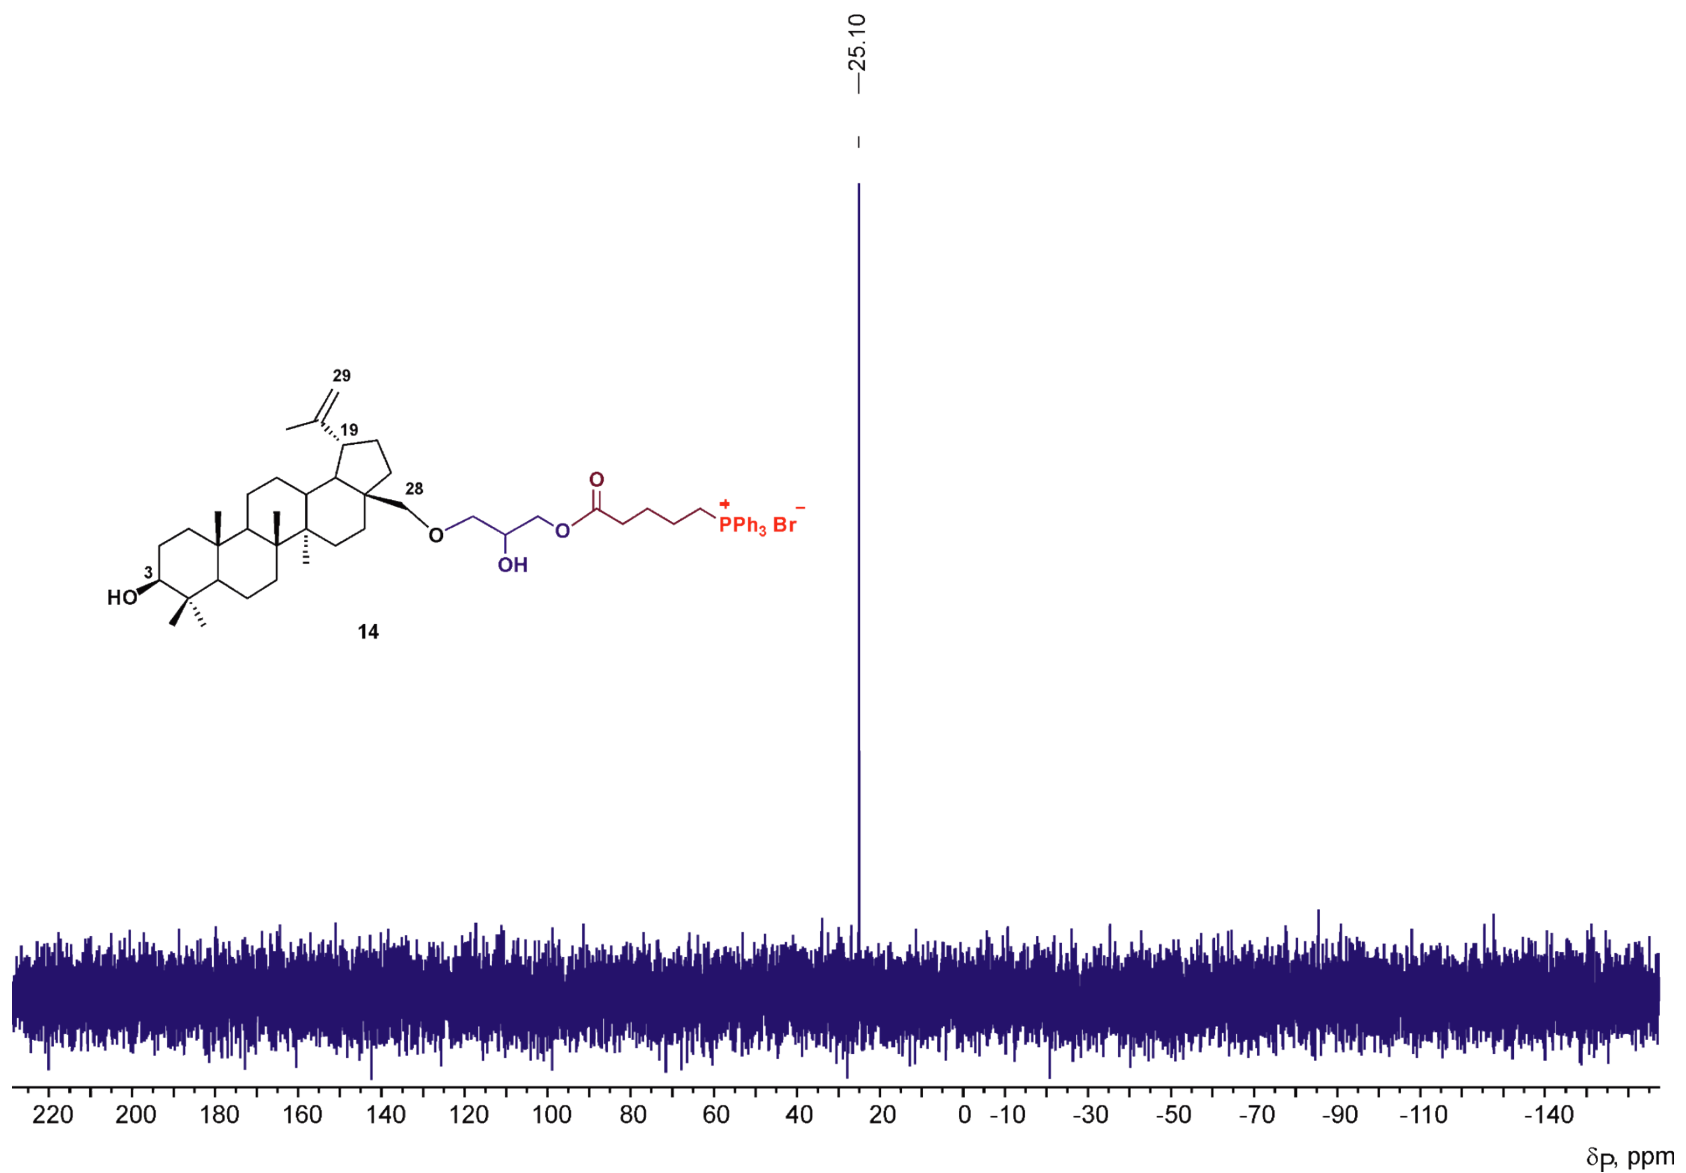

Figure S85.  $^{31}\text{P}$ - $\{^1\text{H}\}$  NMR ( $\text{CDCl}_3$ , 162 MHz) spectrum of **14**.
